# Supplementary material for: A deep-learning algorithm to classify skin lesions from mpox virus infection
Source: PubMed Central journal article supplement (PMC10033450; doi:10.1038/s41591-023-02225-7), 2023-03-02
Supplement: 41591_2023_2225_MOESM1_ESM.pdf [file 41591_2023_2225_MOESM1_ESM.pdf]

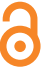

---

# A deep-learning algorithm to classify skin lesions from mpox virus infection

---

In the format provided by the authors and unedited

## Table of Contents

|                                                                                                                                            |            |
|--------------------------------------------------------------------------------------------------------------------------------------------|------------|
| <b>Supplementary Table 1: Frequency Table of Diagnoses in the non-MPXV Dataset</b>                                                         | <b>3</b>   |
| <b>Supplementary Table 2: Frequency Table and False Positive Rates of Diagnoses in the non-MPXV testing cohort</b>                         | <b>29</b>  |
| <b>Supplementary Table 3: Frequency Table and False Positive Rates of Diagnoses in the Esteva Dataset</b>                                  | <b>55</b>  |
| <b>Supplementary Table 4: Frequency Table and False Positive Rates of Diagnoses in the DanderM Repository</b>                              | <b>80</b>  |
| <b>Supplementary Table 5: Frequency Table and False Positive Rates of Diagnoses in the DermIS Repository</b>                               | <b>86</b>  |
| <b>Supplementary Table 6: Frequency Table and False Positive Rates of Diagnoses in the DermNet dataset</b>                                 | <b>101</b> |
| <b>Supplementary Table 7: Frequency Table of Diagnoses in the DermNet NZ Repository</b>                                                    | <b>117</b> |
| <b>Supplementary Table 8: Frequency Table and False Positive Rates of Diagnoses in the Fitzpatrick 17k Dataset</b>                         | <b>127</b> |
| <b>Supplementary Table 9: Frequency Table and False Positive Rates of Diagnoses in the HDA Repository</b>                                  | <b>135</b> |
| <b>Supplementary Table 10: Frequency Table and False Positive Rates of Diagnoses in the PAD-uefs 20 Dataset</b>                            | <b>145</b> |
| <b>Supplementary Table 11: Frequency Tables and False Positive Rates of Diagnoses of the non-MPXV dataset as Excel File</b>                | <b>146</b> |
| <b>Supplementary Table 12: Performance in the detection of MPXV skin lesions using different model architectures.</b>                      | <b>147</b> |
| <b>Supplementary Figure 1: True Positive Rates of the MPXV-CNN in the testing cohort in coalesced and non-coalesced MPXV skin lesions.</b> | <b>148</b> |
| <b>Supplementary Figure 2: False Positive Rates by category of non-MPXV skin disease in the testing cohort.</b>                            | <b>149</b> |
| <b>Supplementary Figure 3: False Positive Rates by differential diagnoses of MPXV in the testing cohort.</b>                               | <b>150</b> |
| <b>Supplementary Figure 4: False Positive Rates by body region of non-MPXV images in the testing cohort (DermIS repository).</b>           | <b>151</b> |
| <b>Supplementary Figure 5: False Positive Rates by age group in non-MPXV images of the testing cohort (DermIS repository).</b>             | <b>152</b> |
| <b>Supplementary Figure 6: False Positive Rates by sex in the testing cohort (DermIS and PAD-uefs 20).</b>                                 | <b>153</b> |
| <b>Supplementary Figure 7: Screenshot of PoxApp for the question on the presence of a skin lesion.</b>                                     | <b>154</b> |
| <b>Supplementary Figure 8: Screenshot of PoxApp of interface for taking or selecting a picture of a skin lesion.</b>                       | <b>155</b> |
| <b>Supplementary Figure 10: Screenshot of PoxApp for date of onset of symptoms.</b>                                                        | <b>157</b> |

|                                                                                                                                  |            |
|----------------------------------------------------------------------------------------------------------------------------------|------------|
| <b>Supplementary Figure 11: Screenshot of PoxApp for the question on risk contacts.</b>                                          | <b>158</b> |
| <b>Supplementary Figure 12: Screenshot of PoxApp for the question on the date of risk contact.</b>                               | <b>159</b> |
| <b>Supplementary Figure 13: Screenshot of PoxApp for the question on sexual preferences.</b>                                     | <b>160</b> |
| <b>Supplementary Figure 14: Screenshot of PoxApp for the zip code question.</b>                                                  | <b>161</b> |
| <b>Supplementary Figure 15: Logic decision tree of PoxApp for MPXV infection risk classification incorporating the MPXV-CNN.</b> | <b>162</b> |
| <b>Supplementary Note 1: Bibliography of sources with images of MPXV lesions.</b>                                                | <b>163</b> |
| <b>Supplementary Note 2: URLs of non-MPXV images from Danderm, DermIS and HDA.</b>                                               | <b>172</b> |

### Supplementary Table 1: Frequency Table of Diagnoses in the non-MPXV Dataset

Frequency table of diagnoses of evaluated skin lesion images in the repositories and datasets comprising the non-MPXV dataset used for training and testing the MPXV-CNN.

All, Number of all evaluated skin lesion images in the non-MPXV dataset; MPXV, Mpox virus; MPXV-CNN, Mpox virus convolutional neural network; n, Number of occurrences of diagnosis; Unknown, Diagnosis unknown or unmapped; %, Percentage of diagnosis in relation to all evaluated skin lesion images in the non-MPXV dataset.

| Category                              | Diagnosis             | n   | %    |
|---------------------------------------|-----------------------|-----|------|
|                                       | pilar cyst            | 879 | 0.63 |
|                                       | skin tag              | 735 | 0.53 |
|                                       | hemangioma            | 655 | 0.47 |
|                                       | pyogenic granuloma    | 554 | 0.40 |
|                                       | dermatofibroma        | 545 | 0.39 |
|                                       | telangiectases        | 492 | 0.36 |
|                                       | fibroma               | 470 | 0.34 |
|                                       | syringoma             | 394 | 0.28 |
|                                       | sebaceous hyperplasia | 365 | 0.26 |
|                                       | fordyce spots         | 318 | 0.23 |
|                                       | mucous cyst           | 305 | 0.22 |
| Benign dermal tumors cysts<br>sinuses | becker nevus          | 250 | 0.18 |
|                                       | angiokeratomas        | 226 | 0.16 |
|                                       | lymphangioma          | 215 | 0.16 |
|                                       | pilomatricoma         | 155 | 0.11 |
|                                       | venous lake           | 132 | 0.10 |
|                                       | adenoma sebaceum      | 131 | 0.09 |
|                                       | port wine stain       | 120 | 0.09 |
|                                       | venous malformations  | 108 | 0.08 |
|                                       | myxoid cyst           | 105 | 0.08 |
|                                       | trichoepithelioma     | 105 | 0.08 |
|                                       | granuloma pyogenic    | 97  | 0.07 |
|                                       | granulation tissue    | 95  | 0.07 |

|                                                  |    |      |
|--------------------------------------------------|----|------|
| <b>leiomyoma</b>                                 | 92 | 0.07 |
| <b>cherry angioma</b>                            | 87 | 0.06 |
| <b>hidrocystoma</b>                              | 87 | 0.06 |
| <b>angioma</b>                                   | 83 | 0.06 |
| <b>haemangioma</b>                               | 76 | 0.05 |
| <b>hemangioma infancy</b>                        | 67 | 0.05 |
| <b>nevus lipomatosis</b>                         | 65 | 0.05 |
| <b>scrotal cyst</b>                              | 64 | 0.05 |
| <b>steatocystoma multiplex</b>                   | 64 | 0.05 |
| <b>spider angioma</b>                            | 63 | 0.05 |
| <b>spider nevus</b>                              | 63 | 0.05 |
| <b>apocrine hydrocystoma</b>                     | 59 | 0.04 |
| <b>cutis marmorata telangiectatica congenita</b> | 56 | 0.04 |
| <b>eccrine poroma</b>                            | 55 | 0.04 |
| <b>glomus tumor</b>                              | 54 | 0.04 |
| <b>trichofolliculoma</b>                         | 54 | 0.04 |
| <b>cylindroma</b>                                | 50 | 0.04 |
| <b>dilated pore of winer</b>                     | 48 | 0.03 |
| <b>klippel trenaunay syndrome</b>                | 46 | 0.03 |
| <b>nevus anemicus</b>                            | 44 | 0.03 |
| <b>ganglion</b>                                  | 41 | 0.03 |
| <b>chondroma</b>                                 | 40 | 0.03 |
| <b>eruptive vellus hair cysts</b>                | 38 | 0.03 |
| <b>dermoid cyst</b>                              | 36 | 0.03 |
| <b>connective tissue nevus</b>                   | 35 | 0.03 |
| <b>acrotrichoma</b>                              | 34 | 0.02 |
| <b>pilonidal sinus</b>                           | 34 | 0.02 |
| <b>infantile digital fibromatosis</b>            | 33 | 0.02 |
| <b>spiradenoma</b>                               | 33 | 0.02 |
| <b>strawberry hemangioma</b>                     | 29 | 0.02 |
| <b>neurolemmoma</b>                              | 28 | 0.02 |
| <b>periungual fibroma</b>                        | 27 | 0.02 |
| <b>ectopic respiratory epithelia</b>             | 26 | 0.02 |

|                                                             |                                         |      |      |
|-------------------------------------------------------------|-----------------------------------------|------|------|
|                                                             | nevus flammeus                          | 25   | 0.02 |
|                                                             | vascular anomaly                        | 24   | 0.02 |
|                                                             | collagen nevus                          | 23   | 0.02 |
|                                                             | dental sinus                            | 22   | 0.02 |
|                                                             | endometriosis                           | 20   | 0.01 |
|                                                             | aponeurotic fibroma                     | 19   | 0.01 |
|                                                             | hemangioma racemosum                    | 19   | 0.01 |
|                                                             | myxoma                                  | 19   | 0.01 |
|                                                             | angioma serpiginosum                    | 18   | 0.01 |
|                                                             | epithelioma adenoides cysticum          | 18   | 0.01 |
|                                                             | lymphatic malformations                 | 18   | 0.01 |
|                                                             | fibrolipoma                             | 17   | 0.01 |
|                                                             | arteriovenous malformation              | 16   | 0.01 |
|                                                             | trichoepithelioma papulosum multiplex   | 15   | 0.01 |
|                                                             | cirroid aneurysm                        | 14   | 0.01 |
|                                                             | myofibromatosis                         | 13   | 0.01 |
|                                                             | trichoblastoma                          | 13   | 0.01 |
|                                                             | tenosynovitis nodular                   | 12   | 0.01 |
|                                                             | cyst synovial                           | 11   | 0.01 |
|                                                             | trichoadenoma                           | 10   | 0.01 |
|                                                             | perifollicular fibroma                  | 8    | 0.01 |
| <hr/>                                                       |                                         |      |      |
| <b>Cutaneous lymphoma and lymphoid infiltrates</b>          | cutaneous t cell lymphoma               | 793  | 0.57 |
|                                                             | lymphoma b cell                         | 180  | 0.13 |
|                                                             | lymphomatoid papulosis                  | 131  | 0.09 |
|                                                             | erythema arciforme et palpabile migrans | 43   | 0.03 |
|                                                             | pseudo lymphoma other types             | 23   | 0.02 |
|                                                             | lymphomas lymphocytic infiltrations     | 12   | 0.01 |
| <hr/>                                                       |                                         |      |      |
| <b>Epidermal tumors hamartomas milia and growths benign</b> | seborrheic keratosis                    | 1294 | 0.93 |
|                                                             | epidermal nevus                         | 876  | 0.63 |
|                                                             | porokeratosis                           | 594  | 0.43 |
|                                                             | seborrheic keratoses ruff               | 478  | 0.35 |
|                                                             | milia                                   | 448  | 0.32 |
|                                                             | benign keratosis                        | 414  | 0.30 |

|                                                     |                                          |      |      |
|-----------------------------------------------------|------------------------------------------|------|------|
|                                                     | <b>prurigo nodularis</b>                 | 361  | 0.26 |
|                                                     | <b>seborrheic keratoses smooth</b>       | 156  | 0.11 |
|                                                     | <b>seborrheic keratosis irritated</b>    | 150  | 0.11 |
|                                                     | <b>corns</b>                             | 101  | 0.07 |
|                                                     | <b>dermatosis papulosa nigra</b>         | 99   | 0.07 |
|                                                     | <b>callus</b>                            | 81   | 0.06 |
|                                                     | <b>stucco keratoses</b>                  | 67   | 0.05 |
|                                                     | <b>acquired digital fibrokeratoma</b>    | 58   | 0.04 |
|                                                     | <b>stucco keratosis</b>                  | 36   | 0.03 |
|                                                     | <b>acral keratosis</b>                   | 34   | 0.02 |
|                                                     | <b>giant comedo</b>                      | 34   | 0.02 |
|                                                     | <b>keratosis seborrheic</b>              | 26   | 0.02 |
|                                                     | <b>clear cell acanthoma</b>              | 23   | 0.02 |
|                                                     | <b>leser trelat sign</b>                 | 19   | 0.01 |
|                                                     | <b>warty dyskeratoma</b>                 | 11   | 0.01 |
|                                                     | <hr/>                                    |      |      |
|                                                     | <b>basal cell carcinoma</b>              | 2664 | 1.92 |
|                                                     | <b>squamous cell carcinoma</b>           | 1333 | 0.96 |
|                                                     | <b>actinic keratosis</b>                 | 1214 | 0.88 |
|                                                     | <b>solar damage actinic keratosis</b>    | 951  | 0.69 |
|                                                     | <b>keratoacanthoma</b>                   | 828  | 0.60 |
|                                                     | <b>bowens disease</b>                    | 703  | 0.51 |
|                                                     | <b>cutaneous horn</b>                    | 218  | 0.16 |
|                                                     | <b>solid cystic basal cell carcinoma</b> | 168  | 0.12 |
|                                                     | <b>actinic cheilitis</b>                 | 158  | 0.11 |
|                                                     | <b>basal cell carcinoma lesion</b>       | 138  | 0.10 |
|                                                     | <b>pagets disease</b>                    | 135  | 0.10 |
|                                                     | <b>leukoplakia</b>                       | 133  | 0.10 |
|                                                     | <b>basal cell carcinoma morpheiform</b>  | 115  | 0.08 |
|                                                     | <b>extramammary paget disease</b>        | 88   | 0.06 |
|                                                     | <b>arsenical keratoses</b>               | 84   | 0.06 |
|                                                     | <b>erythroplasia queyrat</b>             | 81   | 0.06 |
|                                                     | <b>basal cell carcinoma nose</b>         | 79   | 0.06 |
|                                                     | <b>basal cell nevus syndrome</b>         | 79   | 0.06 |
| <b>Epidermal tumors pre malignant and malignant</b> |                                          |      |      |

|                                             |    |      |
|---------------------------------------------|----|------|
| <b>actinic keratosis face</b>               | 77 | 0.06 |
| <b>actinic keratosis lesion</b>             | 66 | 0.05 |
| <b>basal cell carcinoma superficial</b>     | 65 | 0.05 |
| <b>solar damage</b>                         | 63 | 0.05 |
| <b>actinic keratosis fu</b>                 | 59 | 0.04 |
| <b>basal cell carcinoma lid</b>             | 55 | 0.04 |
| <b>basal cell carcinoma ear</b>             | 53 | 0.04 |
| <b>pigmented basal cell carcinoma</b>       | 53 | 0.04 |
| <b>basal cell carcinoma face</b>            | 50 | 0.04 |
| <b>verrucous carcinoma</b>                  | 49 | 0.04 |
| <b>actinic keratosis hand</b>               | 47 | 0.03 |
| <b>squamous cell carcinoma ear</b>          | 43 | 0.03 |
| <b>superficial basal cell carcinoma</b>     | 42 | 0.03 |
| <b>basal cell carcinoma ulcerating</b>      | 37 | 0.03 |
| <b>nevoid basal cell carcinoma syndrome</b> | 37 | 0.03 |
| <b>basal cell carcinoma lip</b>             | 36 | 0.03 |
| <b>solar damage actinex treatment</b>       | 36 | 0.03 |
| <b>keratosis solar</b>                      | 35 | 0.03 |
| <b>squamous cell carcinoma lesion</b>       | 34 | 0.02 |
| <b>carcinoma of lip</b>                     | 32 | 0.02 |
| <b>basal cell carcinoma scalp</b>           | 29 | 0.02 |
| <b>squamous cell carcinoma lip</b>          | 29 | 0.02 |
| <b>actinic keratosis ear</b>                | 28 | 0.02 |
| <b>hypertrophic actinic keratosis</b>       | 27 | 0.02 |
| <b>actinic keratosis horn</b>               | 26 | 0.02 |
| <b>leucoplakia praecancerosa</b>            | 23 | 0.02 |
| <b>ulcus terebrans</b>                      | 22 | 0.02 |
| <b>solar damage actinic cheilitis</b>       | 20 | 0.01 |
| <b>actinic keratosis nose</b>               | 17 | 0.01 |
| <b>squamous cell carcinoma face</b>         | 17 | 0.01 |
| <b>basal cell carcinoma trunk ext</b>       | 15 | 0.01 |
| <b>squamous cell carcinoma nose</b>         | 15 | 0.01 |
| <b>actinic keratosis pigmented</b>          | 14 | 0.01 |



|                                                 |                                                 |     |      |
|-------------------------------------------------|-------------------------------------------------|-----|------|
|                                                 | <b>squamous cell carcinoma hand arm</b>         | 12  | 0.01 |
|                                                 | <b>basal cell carcinoma aldera</b>              | 11  | 0.01 |
|                                                 | <b>keratoacanthoma pendulum</b>                 | 11  | 0.01 |
|                                                 | <b>solar damage fu treatment</b>                | 10  | 0.01 |
|                                                 | <b>basal cell carcinoma sclerosing</b>          | 1   | 0.00 |
|                                                 | <b>neurofibromatosis</b>                        | 731 | 0.53 |
|                                                 | <b>epidermolysis bullosa</b>                    | 597 | 0.43 |
|                                                 | <b>ichthyosis</b>                               | 555 | 0.40 |
|                                                 | <b>dariers disease</b>                          | 543 | 0.39 |
|                                                 | <b>tuberous sclerosis</b>                       | 375 | 0.27 |
|                                                 | <b>hailey hailey disease</b>                    | 293 | 0.21 |
|                                                 | <b>incontinentia pigmenti</b>                   | 229 | 0.17 |
|                                                 | <b>ehlers danlos syndrome</b>                   | 219 | 0.16 |
|                                                 | <b>ichthyosis vulgaris</b>                      | 219 | 0.16 |
|                                                 | <b>acrodermatitis enteropathica</b>             | 137 | 0.10 |
|                                                 | <b>rendu osler syndrome</b>                     | 128 | 0.09 |
|                                                 | <b>xeroderma pigmentosum</b>                    | 127 | 0.09 |
|                                                 | <b>vascular tumors and malformations</b>        | 120 | 0.09 |
|                                                 | <b>pseudoxanthoma elasticum</b>                 | 113 | 0.08 |
|                                                 | <b>epidermolytic hyperkeratosis</b>             | 94  | 0.07 |
|                                                 | <b>collodion baby</b>                           | 77  | 0.06 |
|                                                 | <b>supernumerary growths</b>                    | 77  | 0.06 |
|                                                 | <b>ichthyosis congenita</b>                     | 70  | 0.05 |
|                                                 | <b>erythrokeratoderma variabilis</b>            | 65  | 0.05 |
|                                                 | <b>erythrokeratoderma progressive symmetric</b> | 63  | 0.05 |
|                                                 | <b>ichthyosis sex linked</b>                    | 62  | 0.04 |
|                                                 | <b>x linked ichthyosis</b>                      | 61  | 0.04 |
|                                                 | <b>lipoid proteinosis urbach wiethe disease</b> | 58  | 0.04 |
|                                                 | <b>leopard syndrome</b>                         | 57  | 0.04 |
|                                                 | <b>rothmund thomson syndrome</b>                | 47  | 0.03 |
|                                                 | <b>ichthyosis other forms</b>                   | 42  | 0.03 |
|                                                 | <b>acrokeratoelastoidosis</b>                   | 41  | 0.03 |
| <b>Genodermatoses and supernumerary growths</b> |                                                 |     |      |

|                     |                                              |      |      |
|---------------------|----------------------------------------------|------|------|
|                     | congenital ichthyosiform erythroderma        | 41   | 0.03 |
|                     | peutz jehgers syndrome                       | 41   | 0.03 |
|                     | ichthyosis dominant                          | 38   | 0.03 |
|                     | congenital erythropoietic porphyria          | 37   | 0.03 |
|                     | muir torre syndrome                          | 37   | 0.03 |
|                     | acrokeratosis verruciformis                  | 36   | 0.03 |
|                     | albinism                                     | 34   | 0.02 |
|                     | birt hogg dube                               | 34   | 0.02 |
|                     | cowden disease                               | 34   | 0.02 |
|                     | congenital dyskeratosis                      | 27   | 0.02 |
|                     | buschke ollendorf syndrome                   | 25   | 0.02 |
|                     | congenital anomalies                         | 22   | 0.02 |
|                     | sjgren larsson syndrome                      | 17   | 0.01 |
|                     | laugier hunziker s syndrome                  | 15   | 0.01 |
|                     | lamellar ichthyosis                          | 13   | 0.01 |
|                     | dyschromatosis universalis                   | 11   | 0.01 |
|                     | ichthyosis hystrix                           | 11   | 0.01 |
|                     | erythrodermia exfoliativa leiner             | 9    | 0.01 |
|                     | gargoylism                                   | 9    | 0.01 |
|                     | knuckle pads                                 | 9    | 0.01 |
|                     | leprechaunism syndrome                       | 9    | 0.01 |
|                     | phakomatosis pigmentovascularis              | 7    | 0.01 |
|                     | harlequin ichthyosis                         | 6    | 0.00 |
|                     | <hr/>                                        |      |      |
|                     | acne vulgaris                                | 2713 | 1.96 |
|                     | psoriasis                                    | 1575 | 1.14 |
|                     | lichen planus                                | 1345 | 0.97 |
|                     | rosacea                                      | 1150 | 0.83 |
|                     | scabies                                      | 1082 | 0.78 |
|                     | herpes zoster                                | 1076 | 0.78 |
|                     | eczema                                       | 1073 | 0.77 |
|                     | erythema multiforme and fixed drug eruptions | 962  | 0.69 |
|                     | leprosy                                      | 953  | 0.69 |
| <b>Inflammatory</b> |                                              |      |      |

|                                                                                     |     |      |
|-------------------------------------------------------------------------------------|-----|------|
| <b>seborrheic dermatitis</b>                                                        | 951 | 0.69 |
| <b>photodermatoses</b>                                                              | 947 | 0.68 |
| <b>drug eruption</b>                                                                | 946 | 0.68 |
| <b>pigmentation diseases</b>                                                        | 929 | 0.67 |
| <b>syphilis</b>                                                                     | 918 | 0.66 |
| <b>lichen</b>                                                                       | 914 | 0.66 |
| <b>allergic contact dermatitis</b>                                                  | 905 | 0.65 |
| <b>onychomycosis</b>                                                                | 895 | 0.65 |
| <b>vasculitis</b>                                                                   | 843 | 0.61 |
| <b>scarring</b>                                                                     | 804 | 0.58 |
| <b>molluscum contagiosum</b>                                                        | 788 | 0.57 |
| <b>non scarring alopecia</b>                                                        | 782 | 0.56 |
| <b>impetigo</b>                                                                     | 778 | 0.56 |
| <b>depositional diseases calcinosis cutis<br/>amyloid mucinosis gout and others</b> | 776 | 0.56 |
| <b>sarcoidosis</b>                                                                  | 772 | 0.56 |
| <b>sunburn</b>                                                                      | 764 | 0.55 |
| <b>atrophic skin disease striae and elastic<br/>fiber disorders</b>                 | 747 | 0.54 |
| <b>urticaria</b>                                                                    | 746 | 0.54 |
| <b>alopecia</b>                                                                     | 731 | 0.53 |
| <b>granuloma annulare</b>                                                           | 731 | 0.53 |
| <b>tinea corporis</b>                                                               | 731 | 0.53 |
| <b>fungal infections dermal and subcut</b>                                          | 718 | 0.52 |
| <b>hair disorder trichorrhexis nodosa etc</b>                                       | 709 | 0.51 |
| <b>scarring alopecia</b>                                                            | 703 | 0.51 |
| <b>tick bite</b>                                                                    | 667 | 0.48 |
| <b>pityriasis rosea</b>                                                             | 661 | 0.48 |
| <b>folliculitis</b>                                                                 | 656 | 0.47 |
| <b>pustular skin disease non infectious</b>                                         | 656 | 0.47 |
| <b>malformations of extremities</b>                                                 | 653 | 0.47 |
| <b>dermatomyositis</b>                                                              | 629 | 0.45 |
| <b>candidiasis</b>                                                                  | 581 | 0.42 |
| <b>bullous pemphigoid</b>                                                           | 580 | 0.42 |

|                                                            |     |      |
|------------------------------------------------------------|-----|------|
| <b>xanthomas</b>                                           | 545 | 0.39 |
| <b>tinea pedis</b>                                         | 538 | 0.39 |
| <b>histiocytic disorders and proliferations</b>            | 529 | 0.38 |
| <b>lichen sclerosus skin</b>                               | 523 | 0.38 |
| <b>perioral dermatitis</b>                                 | 520 | 0.38 |
| <b>gyrate erythemas</b>                                    | 510 | 0.37 |
| <b>factitial dermatitis</b>                                | 488 | 0.35 |
| <b>pityriasis rubra pilaris</b>                            | 487 | 0.35 |
| <b>lupus acute</b>                                         | 477 | 0.34 |
| <b>scleroderma</b>                                         | 476 | 0.34 |
| <b>nematode infection</b>                                  | 462 | 0.33 |
| <b>stasis ulcer</b>                                        | 459 | 0.33 |
| <b>keratosis pilaris and related follicular disorders</b>  | 454 | 0.33 |
| <b>atopic dermatitis</b>                                   | 451 | 0.33 |
| <b>mastocytosis</b>                                        | 448 | 0.32 |
| <b>lichen simplex</b>                                      | 447 | 0.32 |
| <b>diaper dermatitis</b>                                   | 435 | 0.31 |
| <b>panniculitis lipodystrophy and diseases of subcutis</b> | 430 | 0.31 |
| <b>hidradenitis</b>                                        | 426 | 0.31 |
| <b>herpes simplex</b>                                      | 424 | 0.31 |
| <b>toxic epidermal necrolysis and stevens johnson</b>      | 424 | 0.31 |
| <b>dyshidrotic eczema</b>                                  | 416 | 0.30 |
| <b>rhinophyma</b>                                          | 392 | 0.28 |
| <b>metabolic and nutritional diseases</b>                  | 390 | 0.28 |
| <b>cheilitis</b>                                           | 385 | 0.28 |
| <b>pediculosis lids</b>                                    | 382 | 0.28 |
| <b>dermatitis herpetiformis</b>                            | 376 | 0.27 |
| <b>acanthosis nigricans and carp</b>                       | 367 | 0.26 |
| <b>atopic dermatitis feet</b>                              | 367 | 0.26 |
| <b>morphea</b>                                             | 360 | 0.26 |
| <b>necrobiosis lipoidica</b>                               | 359 | 0.26 |

|                                                     |     |      |
|-----------------------------------------------------|-----|------|
| <b>psoriasis chronic plaque</b>                     | 355 | 0.26 |
| <b>porphyria</b>                                    | 354 | 0.26 |
| <b>varicella</b>                                    | 353 | 0.25 |
| <b>atopic dermatitis adult phase</b>                | 345 | 0.25 |
| <b>cutaneous manifestations of systemic disease</b> | 328 | 0.24 |
| <b>lupus subacute</b>                               | 327 | 0.24 |
| <b>dry skin eczema</b>                              | 322 | 0.23 |
| <b>pemphigus vulgaris</b>                           | 322 | 0.23 |
| <b>condyloma acuminata</b>                          | 308 | 0.22 |
| <b>pityriasis versicolor</b>                        | 307 | 0.22 |
| <b>erysipelas</b>                                   | 301 | 0.22 |
| <b>eczema hand</b>                                  | 300 | 0.22 |
| <b>virus exanthem</b>                               | 297 | 0.21 |
| <b>pityriasis lichenoides and pleva</b>             | 294 | 0.21 |
| <b>genital warts</b>                                | 293 | 0.21 |
| <b>pemphigus</b>                                    | 293 | 0.21 |
| <b>hand foot mouth</b>                              | 288 | 0.21 |
| <b>tinea capitis</b>                                | 286 | 0.21 |
| <b>tinea versicolor</b>                             | 286 | 0.21 |
| <b>stasis dermatitis</b>                            | 284 | 0.21 |
| <b>sun damaged skin</b>                             | 282 | 0.20 |
| <b>contact dermatitis</b>                           | 280 | 0.20 |
| <b>solar elastosis</b>                              | 276 | 0.20 |
| <b>erythroderma</b>                                 | 267 | 0.19 |
| <b>shoe allergy</b>                                 | 266 | 0.19 |
| <b>eczema herpeticum</b>                            | 255 | 0.18 |
| <b>diseases of the ear</b>                          | 250 | 0.18 |
| <b>eczema nummular</b>                              | 246 | 0.18 |
| <b>paronychia</b>                                   | 245 | 0.18 |
| <b>reiters disease</b>                              | 240 | 0.17 |
| <b>tinea cruris</b>                                 | 235 | 0.17 |
| <b>pigmented purpuric dermatosis</b>                | 228 | 0.16 |

|                                     |     |      |
|-------------------------------------|-----|------|
| <b>pernio and mimics</b>            | 226 | 0.16 |
| <b>discoid lupus erythematosus</b>  | 224 | 0.16 |
| <b>tinea ringworm body</b>          | 219 | 0.16 |
| <b>irritant contact dermatitis</b>  | 218 | 0.16 |
| <b>gianotti crosti</b>              | 215 | 0.16 |
| <b>livedo reticularis</b>           | 214 | 0.15 |
| <b>tuberculosis</b>                 | 214 | 0.15 |
| <b>insect bite</b>                  | 211 | 0.15 |
| <b>solar purpura</b>                | 211 | 0.15 |
| <b>biting fleas</b>                 | 209 | 0.15 |
| <b>pityrosporum folliculitis</b>    | 206 | 0.15 |
| <b>solar damage atrophy</b>         | 206 | 0.15 |
| <b>nummular eczema</b>              | 205 | 0.15 |
| <b>onycholysis</b>                  | 205 | 0.15 |
| <b>neurotic excoriations</b>        | 204 | 0.15 |
| <b>tinea ringworm versicolor</b>    | 203 | 0.15 |
| <b>pitted keratolysis</b>           | 202 | 0.15 |
| <b>tungiasis</b>                    | 202 | 0.15 |
| <b>acne cystic</b>                  | 198 | 0.14 |
| <b>atopic eczema</b>                | 194 | 0.14 |
| <b>psoriasis palms soles</b>        | 192 | 0.14 |
| <b>planar warts</b>                 | 185 | 0.13 |
| <b>acne keloidalis</b>              | 184 | 0.13 |
| <b>misuse dermatitis</b>            | 184 | 0.13 |
| <b>rhus dermatitis</b>              | 181 | 0.13 |
| <b>lupus chronic cutaneous</b>      | 180 | 0.13 |
| <b>behcets disease</b>              | 179 | 0.13 |
| <b>nail psoriasis</b>               | 177 | 0.13 |
| <b>furuncle</b>                     | 173 | 0.12 |
| <b>intertrigo</b>                   | 170 | 0.12 |
| <b>neurodermatitis</b>              | 170 | 0.12 |
| <b>stasis dermatitis and ulcers</b> | 169 | 0.12 |
| <b>warts</b>                        | 168 | 0.12 |

|                                             |     |      |
|---------------------------------------------|-----|------|
| <b>eczema fingertips</b>                    | 166 | 0.12 |
| <b>verruca vulgaris</b>                     | 165 | 0.12 |
| <b>ulcer</b>                                | 161 | 0.12 |
| <b>psoriasis nails</b>                      | 160 | 0.12 |
| <b>grovers disease</b>                      | 159 | 0.11 |
| <b>tattoo and foreign body reactions</b>    | 159 | 0.11 |
| <b>lichen nitidus</b>                       | 157 | 0.11 |
| <b>perforating disorders</b>                | 156 | 0.11 |
| <b>cellulitis</b>                           | 154 | 0.11 |
| <b>herpes type recurrent</b>                | 154 | 0.11 |
| <b>scleromyxedema</b>                       | 154 | 0.11 |
| <b>herpes gestationis</b>                   | 153 | 0.11 |
| <b>scarlet fever</b>                        | 149 | 0.11 |
| <b>stasis edema</b>                         | 148 | 0.11 |
| <b>tinea manus</b>                          | 146 | 0.11 |
| <b>balanitis</b>                            | 143 | 0.10 |
| <b>psoriasis scalp</b>                      | 143 | 0.10 |
| <b>leukocytoclastic vasculitis</b>          | 142 | 0.10 |
| <b>warts vulgaris</b>                       | 141 | 0.10 |
| <b>herpes type primary</b>                  | 139 | 0.10 |
| <b>clubbing</b>                             | 138 | 0.10 |
| <b>ashy dermatosis</b>                      | 137 | 0.10 |
| <b>hypereosinophilic syndrome</b>           | 134 | 0.10 |
| <b>radiodermatitis</b>                      | 134 | 0.10 |
| <b>staphylococcal scalded skin syndrome</b> | 132 | 0.10 |
| <b>bacterial infections</b>                 | 130 | 0.09 |
| <b>herpes cutaneous</b>                     | 130 | 0.09 |
| <b>ingrown nail</b>                         | 129 | 0.09 |
| <b>pemphigus foliaceus</b>                  | 128 | 0.09 |
| <b>id reaction</b>                          | 127 | 0.09 |
| <b>psoriasis guttate</b>                    | 126 | 0.09 |
| <b>solar damage favre racouchot</b>         | 126 | 0.09 |
| <b>tinea ringworm groin</b>                 | 126 | 0.09 |

|                                                       |     |      |
|-------------------------------------------------------|-----|------|
| angioedema                                            | 125 | 0.09 |
| beaus lines                                           | 125 | 0.09 |
| subacute cutaneous lupus erythematosus                | 125 | 0.09 |
| dermographia                                          | 124 | 0.09 |
| acquired autoimmune bullous diseaseherpes gestationis | 122 | 0.09 |
| lupus vulgaris                                        | 122 | 0.09 |
| atopic dermatitis infant phase                        | 120 | 0.09 |
| median nail dystrophy                                 | 120 | 0.09 |
| erythrasma                                            | 119 | 0.09 |
| eczema subacute                                       | 118 | 0.09 |
| henoch schonlein purpura                              | 118 | 0.09 |
| patch testing                                         | 118 | 0.09 |
| pincer nails                                          | 118 | 0.09 |
| tinea faciale                                         | 118 | 0.09 |
| erythema ab igne                                      | 117 | 0.08 |
| pemphigus foliaceus                                   | 117 | 0.08 |
| warts common                                          | 117 | 0.08 |
| subacute cutaneous lupus erythematosus<br>scler       | 116 | 0.08 |
| warts plantar                                         | 116 | 0.08 |
| chronic recurrent aphthae                             | 115 | 0.08 |
| inverse psoriasis                                     | 114 | 0.08 |
| diabetic ulcer                                        | 113 | 0.08 |
| lupus erythematosus chronicus discoides               | 112 | 0.08 |
| lupus erythematosus systemic                          | 112 | 0.08 |
| tinea faciei                                          | 112 | 0.08 |
| atopic dermatitis childhood phase                     | 111 | 0.08 |
| lymphedema                                            | 111 | 0.08 |
| measles                                               | 110 | 0.08 |
| eczema foot                                           | 109 | 0.08 |
| thermal burn                                          | 109 | 0.08 |
| erythema infectiosum                                  | 107 | 0.08 |
| myiasis                                               | 107 | 0.08 |



|                                         |     |      |
|-----------------------------------------|-----|------|
| <b>nail diseases</b>                    | 107 | 0.08 |
| <b>pseudofolliculitis barbae</b>        | 107 | 0.08 |
| <b>tinea nigra</b>                      | 107 | 0.08 |
| <b>raynauds disease</b>                 | 106 | 0.08 |
| <b>crest syndrome</b>                   | 105 | 0.08 |
| <b>herpes simplex analis</b>            | 105 | 0.08 |
| <b>keratolysis exfoliativa</b>          | 105 | 0.08 |
| <b>miliaria</b>                         | 105 | 0.08 |
| <b>steroid acne</b>                     | 105 | 0.08 |
| <b>enterovirus</b>                      | 104 | 0.08 |
| <b>geographic tongue</b>                | 104 | 0.08 |
| <b>papulose bowenoide</b>               | 104 | 0.08 |
| <b>purpura</b>                          | 104 | 0.08 |
| <b>wart</b>                             | 102 | 0.07 |
| <b>rosacea nose</b>                     | 101 | 0.07 |
| <b>urticaria acute</b>                  | 100 | 0.07 |
| <b>acne pustular</b>                    | 99  | 0.07 |
| <b>atypical mycobacterium</b>           | 99  | 0.07 |
| <b>orf</b>                              | 99  | 0.07 |
| <b>poikiloderma civatte</b>             | 98  | 0.07 |
| <b>acne excoriee</b>                    | 97  | 0.07 |
| <b>psoriasis hand</b>                   | 97  | 0.07 |
| <b>spider bite</b>                      | 97  | 0.07 |
| <b>psoriasis inversa</b>                | 95  | 0.07 |
| <b>neurotrophic ulcer</b>               | 93  | 0.07 |
| <b>tinea ringworm face</b>              | 93  | 0.07 |
| <b>habit tic deformity</b>              | 89  | 0.06 |
| <b>pseudomonas</b>                      | 89  | 0.06 |
| <b>progressive systemic scleroderma</b> | 88  | 0.06 |
| <b>epidermodysplasia verruciformis</b>  | 87  | 0.06 |
| <b>scalp psoriasis</b>                  | 87  | 0.06 |
| <b>acne conglobata</b>                  | 85  | 0.06 |
| <b>erythema elevatum diutinum</b>       | 84  | 0.06 |

|                                             |    |      |
|---------------------------------------------|----|------|
| <b>terry nails</b>                          | 83 | 0.06 |
| <b>tinea ringworm foot webs</b>             | 82 | 0.06 |
| <b>leukonychia</b>                          | 81 | 0.06 |
| <b>myxoedema pretibial</b>                  | 80 | 0.06 |
| <b>splinter hemorrhage</b>                  | 80 | 0.06 |
| <b>wet to dry foot syndrome</b>             | 80 | 0.06 |
| <b>chronic bullous disease of childhood</b> | 79 | 0.06 |
| <b>pigmented bands</b>                      | 79 | 0.06 |
| <b>warts flat</b>                           | 79 | 0.06 |
| <b>tinea ringworm scalp</b>                 | 78 | 0.06 |
| <b>acne closed comedo</b>                   | 77 | 0.06 |
| <b>diseases of the eye</b>                  | 77 | 0.06 |
| <b>urticarial vasculitis</b>                | 77 | 0.06 |
| <b>tinea ringworm hand dorsum</b>           | 76 | 0.05 |
| <b>acne open comedo</b>                     | 75 | 0.05 |
| <b>hairy tongue</b>                         | 75 | 0.05 |
| <b>lichen planus oral</b>                   | 74 | 0.05 |
| <b>psoriasis treatment</b>                  | 74 | 0.05 |
| <b>epidermolysis bullosa acquisita</b>      | 73 | 0.05 |
| <b>guttate psoriasis</b>                    | 73 | 0.05 |
| <b>nail dystrophy</b>                       | 73 | 0.05 |
| <b>gonorrhea</b>                            | 72 | 0.05 |
| <b>tinea ringworm laboratory</b>            | 72 | 0.05 |
| <b>chancroid</b>                            | 71 | 0.05 |
| <b>cimicosis</b>                            | 71 | 0.05 |
| <b>herpetic sycosis</b>                     | 71 | 0.05 |
| <b>hyperhidrosis</b>                        | 71 | 0.05 |
| <b>koilonychia</b>                          | 71 | 0.05 |
| <b>rheumatoid nodule</b>                    | 71 | 0.05 |
| <b>lichen striatus</b>                      | 70 | 0.05 |
| <b>tinea ringworm foot dorsum</b>           | 70 | 0.05 |
| <b>herpes simplex labialis</b>              | 69 | 0.05 |
| <b>pachyonychia congenita</b>               | 68 | 0.05 |

|                                                               |    |      |
|---------------------------------------------------------------|----|------|
| relapsing polychondritis                                      | 68 | 0.05 |
| desquamation                                                  | 67 | 0.05 |
| pemphigus vegetans                                            | 67 | 0.05 |
| psoriasis vulgaris chronic stationary type                    | 67 | 0.05 |
| tinea faciei                                                  | 67 | 0.05 |
| diseases of bone                                              | 66 | 0.05 |
| eosinophilic pustular folliculitis                            | 65 | 0.05 |
| erythema craquele                                             | 65 | 0.05 |
| fibromatosis                                                  | 64 | 0.05 |
| panarteritis nodosa kussmaul maier                            | 64 | 0.05 |
| candidiasis chronic mucocutaneos                              | 63 | 0.05 |
| warts periungual                                              | 63 | 0.05 |
| atrophy blanche                                               | 62 | 0.04 |
| ecthyma simplex                                               | 62 | 0.04 |
| onychogryphosis                                               | 62 | 0.04 |
| twenty nail dystrophy                                         | 62 | 0.04 |
| acne scar                                                     | 61 | 0.04 |
| hidroa vacciniforme                                           | 61 | 0.04 |
| lupus erythematosus subacute cutaneous<br>lupus erythematosus | 60 | 0.04 |
| sjogrens syndrome                                             | 60 | 0.04 |
| solar damage telangiectasia                                   | 60 | 0.04 |
| warts digitate                                                | 60 | 0.04 |
| localized scleroderma                                         | 59 | 0.04 |
| cholinergic urticaria                                         | 58 | 0.04 |
| pemphigus mucosae                                             | 57 | 0.04 |
| tinea incognito                                               | 57 | 0.04 |
| tinea ringworm primary lesion                                 | 57 | 0.04 |
| acne fulminans                                                | 56 | 0.04 |
| green nail                                                    | 56 | 0.04 |
| lichen planus penis                                           | 55 | 0.04 |
| nail trauma                                                   | 55 | 0.04 |
| tinea ringworm incognito                                      | 55 | 0.04 |

|                                                    |    |      |
|----------------------------------------------------|----|------|
| <b>angiolymphoid hyperplasia with eosinophilia</b> | 54 | 0.04 |
| <b>kawasaki syndrome</b>                           | 54 | 0.04 |
| <b>psoriasis vulgaris guttate type</b>             | 54 | 0.04 |
| <b>warts cryotherapy</b>                           | 54 | 0.04 |
| <b>dermatoliposclerosis</b>                        | 53 | 0.04 |
| <b>acne papulopustulosa</b>                        | 52 | 0.04 |
| <b>eczema chronic</b>                              | 52 | 0.04 |
| <b>piedra white</b>                                | 52 | 0.04 |
| <b>stomatitis</b>                                  | 52 | 0.04 |
| <b>trichomycosis</b>                               | 52 | 0.04 |
| <b>caterpillar dermatitis</b>                      | 51 | 0.04 |
| <b>fissure</b>                                     | 51 | 0.04 |
| <b>parapsoriasis en plaques</b>                    | 51 | 0.04 |
| <b>tinea ringworm foot plantar</b>                 | 51 | 0.04 |
| <b>tinea ringworm palm</b>                         | 51 | 0.04 |
| <b>abrasion</b>                                    | 50 | 0.04 |
| <b>chronic venous insufficiency grade ii</b>       | 50 | 0.04 |
| <b>lichen planus actinicus</b>                     | 50 | 0.04 |
| <b>lichen planus of the mucosa</b>                 | 50 | 0.04 |
| <b>acne inversa</b>                                | 49 | 0.04 |
| <b>meningococemia</b>                              | 49 | 0.04 |
| <b>psoriasis palmoplantaris</b>                    | 49 | 0.04 |
| <b>acne cystica</b>                                | 48 | 0.03 |
| <b>lichen planus follicularis</b>                  | 48 | 0.03 |
| <b>maceration</b>                                  | 48 | 0.03 |
| <b>skin diseases of pregnancy</b>                  | 47 | 0.03 |
| <b>acne rosacea</b>                                | 46 | 0.03 |
| <b>cicatricial pemphigoid</b>                      | 46 | 0.03 |
| <b>erosio interdigitalis blastomycetica</b>        | 46 | 0.03 |
| <b>granuloma</b>                                   | 46 | 0.03 |
| <b>lichen planus linearis</b>                      | 46 | 0.03 |
| <b>morphea linear</b>                              | 46 | 0.03 |

|                                            |    |      |
|--------------------------------------------|----|------|
| <b>nail pigmentation</b>                   | 46 | 0.03 |
| <b>psoriatic erythroderma</b>              | 46 | 0.03 |
| <b>reticular erythematous mucinosis</b>    | 46 | 0.03 |
| <b>warts filiformis</b>                    | 46 | 0.03 |
| <b>lichen planus of the mucosa erosive</b> | 45 | 0.03 |
| <b>staphylococcal folliculitis</b>         | 45 | 0.03 |
| <b>cercaria dermatitis</b>                 | 44 | 0.03 |
| <b>eczema arms</b>                         | 44 | 0.03 |
| <b>eczema leg</b>                          | 44 | 0.03 |
| <b>herpes buttocks</b>                     | 44 | 0.03 |
| <b>psoriasis penis</b>                     | 44 | 0.03 |
| <b>rocky mountain spotted fever</b>        | 44 | 0.03 |
| <b>fox fordyce disease</b>                 | 43 | 0.03 |
| <b>tylotic dermatitis</b>                  | 43 | 0.03 |
| <b>degos disease</b>                       | 42 | 0.03 |
| <b>lichen planopilaris</b>                 | 42 | 0.03 |
| <b>nail beading</b>                        | 42 | 0.03 |
| <b>cutis marmorata</b>                     | 41 | 0.03 |
| <b>diabetic bullae</b>                     | 41 | 0.03 |
| <b>folliculitis cheloidalis</b>            | 41 | 0.03 |
| <b>infected eczema</b>                     | 41 | 0.03 |
| <b>pseudomonas folliculitis</b>            | 41 | 0.03 |
| <b>dermatitis swimming</b>                 | 40 | 0.03 |
| <b>psoriasis vulgaris nail changes</b>     | 40 | 0.03 |
| <b>thrombocytopenic purpura idiopatic</b>  | 40 | 0.03 |
| <b>half and half nail</b>                  | 39 | 0.03 |
| <b>lichen planus drug</b>                  | 39 | 0.03 |
| <b>nodulo cystic acne vulgaris</b>         | 39 | 0.03 |
| <b>psoriasis arthropathica</b>             | 39 | 0.03 |
| <b>acne infantile</b>                      | 38 | 0.03 |
| <b>cat scratch disease</b>                 | 38 | 0.03 |
| <b>eczema face</b>                         | 38 | 0.03 |
| <b>infantile atopic dermatitis</b>         | 38 | 0.03 |

|                                              |    |      |
|----------------------------------------------|----|------|
| <b>nail polish dermatitis</b>                | 38 | 0.03 |
| <b>psoriasis inversus</b>                    | 38 | 0.03 |
| <b>schistosomiasis cutaneous</b>             | 38 | 0.03 |
| <b>trichostasis spinulosa</b>                | 38 | 0.03 |
| <b>urticaria vasculitis</b>                  | 38 | 0.03 |
| <b>candidiasis mouth</b>                     | 37 | 0.03 |
| <b>gangrene</b>                              | 37 | 0.03 |
| <b>rosacea steroid</b>                       | 37 | 0.03 |
| <b>lichen planus annular</b>                 | 36 | 0.03 |
| <b>metal dermatitis</b>                      | 36 | 0.03 |
| <b>peripheral occlusive arterial disease</b> | 36 | 0.03 |
| <b>roseola infantum</b>                      | 36 | 0.03 |
| <b>scrophuloderma</b>                        | 36 | 0.03 |
| <b>cryoglobulinemia</b>                      | 35 | 0.03 |
| <b>eczema areola</b>                         | 35 | 0.03 |
| <b>gingival disease</b>                      | 35 | 0.03 |
| <b>herpes simplex genitalis</b>              | 35 | 0.03 |
| <b>linear scleroderma</b>                    | 35 | 0.03 |
| <b>purpura fulminans</b>                     | 35 | 0.03 |
| <b>ridging beading</b>                       | 35 | 0.03 |
| <b>varicosis</b>                             | 35 | 0.03 |
| <b>acroangiodermatitis</b>                   | 34 | 0.02 |
| <b>herpes simplex virus</b>                  | 34 | 0.02 |
| <b>pomade acne</b>                           | 34 | 0.02 |
| <b>tinea barbae</b>                          | 34 | 0.02 |
| <b>erysipeloid</b>                           | 33 | 0.02 |
| <b>herpetic gingivostomatite</b>             | 33 | 0.02 |
| <b>morphoea generalized</b>                  | 33 | 0.02 |
| <b>small pox</b>                             | 33 | 0.02 |
| <b>wound infection</b>                       | 33 | 0.02 |
| <b>acne neonatorum</b>                       | 32 | 0.02 |
| <b>connective tissue disorders</b>           | 32 | 0.02 |
| <b>ischemia</b>                              | 32 | 0.02 |

|                                                |    |      |
|------------------------------------------------|----|------|
| <b>acute eczema</b>                            | 31 | 0.02 |
| <b>eczematid</b>                               | 31 | 0.02 |
| <b>fourniers gangrene</b>                      | 31 | 0.02 |
| <b>painful bruising syndrome</b>               | 31 | 0.02 |
| <b>scrotal tongue</b>                          | 31 | 0.02 |
| <b>thrombangiitis obliterans</b>               | 31 | 0.02 |
| <b>dermatitis ekzema</b>                       | 30 | 0.02 |
| <b>wells syndrome</b>                          | 30 | 0.02 |
| <b>lichen planus hypertrophic</b>              | 29 | 0.02 |
| <b>lichen planus vesicular</b>                 | 29 | 0.02 |
| <b>pemphigoid bullous pemphigoid</b>           | 29 | 0.02 |
| <b>sycosis barbae</b>                          | 29 | 0.02 |
| <b>tinea manuum</b>                            | 29 | 0.02 |
| <b>verrucae planae juveniles</b>               | 29 | 0.02 |
| <b>axillary granular parakeratosis</b>         | 28 | 0.02 |
| <b>lupus erythematosus chronicus verrucous</b> | 28 | 0.02 |
| <b>nail cosmesis</b>                           | 28 | 0.02 |
| <b>psoriasis anus</b>                          | 28 | 0.02 |
| <b>acanthoma fissuratum</b>                    | 27 | 0.02 |
| <b>dry nails</b>                               | 27 | 0.02 |
| <b>lichen planus exanthematicus</b>            | 27 | 0.02 |
| <b>solar damage cutis rhomboidalis nuchae</b>  | 27 | 0.02 |
| <b>torus palantine</b>                         | 27 | 0.02 |
| <b>warts mouth</b>                             | 27 | 0.02 |
| <b>distal splitting hang nail</b>              | 26 | 0.02 |
| <b>eczema lids</b>                             | 26 | 0.02 |
| <b>granuloma multiforme</b>                    | 26 | 0.02 |
| <b>malassezia folliculitis</b>                 | 26 | 0.02 |
| <b>decubitus ulcer</b>                         | 25 | 0.02 |
| <b>diabetic gangrene</b>                       | 25 | 0.02 |
| <b>eczema acute</b>                            | 25 | 0.02 |
| <b>eczema trunk generalized</b>                | 25 | 0.02 |
| <b>nail ridging</b>                            | 25 | 0.02 |

|                                                                 |    |      |
|-----------------------------------------------------------------|----|------|
| <b>onychoschizia</b>                                            | 25 | 0.02 |
| <b>interstitial granulomatous dermatitis</b>                    | 24 | 0.02 |
| <b>racquet nail</b>                                             | 24 | 0.02 |
| <b>tinea ringworm beard</b>                                     | 24 | 0.02 |
| <b>benign mucosal pemphigoid</b>                                | 23 | 0.02 |
| <b>eosinophilic ulcer of the tongue</b>                         | 23 | 0.02 |
| <b>pyoderma faciale</b>                                         | 23 | 0.02 |
| <b>erysipelas bullosum</b>                                      | 22 | 0.02 |
| <b>mucous membrane psoriasis</b>                                | 22 | 0.02 |
| <b>notalgia paraesthetica</b>                                   | 22 | 0.02 |
| <b>streptococci anal penis</b>                                  | 22 | 0.02 |
| <b>urticaria factitia</b>                                       | 22 | 0.02 |
| <b>warts oral</b>                                               | 22 | 0.02 |
| <b>gloves and socks syndrome</b>                                | 21 | 0.02 |
| <b>heels dry cracked</b>                                        | 21 | 0.02 |
| <b>lupus erythematosus tumidus</b>                              | 21 | 0.02 |
| <b>pincer nail syndrome</b>                                     | 21 | 0.02 |
| <b>eczema anal</b>                                              | 20 | 0.01 |
| <b>hecks disease</b>                                            | 20 | 0.01 |
| <b>acne necrotica</b>                                           | 19 | 0.01 |
| <b>culicosis bullosa</b>                                        | 19 | 0.01 |
| <b>eczema ears</b>                                              | 19 | 0.01 |
| <b>lichen planus verrucosus</b>                                 | 19 | 0.01 |
| <b>lupus erythematosus chronicus disseminatus superficialis</b> | 19 | 0.01 |
| <b>palmar wart</b>                                              | 19 | 0.01 |
| <b>atopic eczema of the hands</b>                               | 18 | 0.01 |
| <b>disseminated lokalized scleroderma</b>                       | 18 | 0.01 |
| <b>erythromelalgia</b>                                          | 18 | 0.01 |
| <b>gram negative infection of the foot</b>                      | 18 | 0.01 |
| <b>localized pemphigoid</b>                                     | 18 | 0.01 |
| <b>nail shedding</b>                                            | 18 | 0.01 |
| <b>warts immunocompromised</b>                                  | 18 | 0.01 |



|                                                 |    |      |
|-------------------------------------------------|----|------|
| <b>ant bite</b>                                 | 17 | 0.01 |
| <b>dermatosis neglecta</b>                      | 17 | 0.01 |
| <b>glanzmanns thrombasthenia</b>                | 17 | 0.01 |
| <b>morphoea nodular</b>                         | 17 | 0.01 |
| <b>morsicatio buccarum</b>                      | 17 | 0.01 |
| <b>onychodystrophia mediana canaliformis</b>    | 17 | 0.01 |
| <b>psoriasis light sensitive</b>                | 17 | 0.01 |
| <b>psoriasis nail psoriasis</b>                 | 17 | 0.01 |
| <b>acne comedonica</b>                          | 16 | 0.01 |
| <b>leukoedema oral</b>                          | 16 | 0.01 |
| <b>parasitoses bites</b>                        | 16 | 0.01 |
| <b>allergic hand eczema</b>                     | 15 | 0.01 |
| <b>balanitis bacterial</b>                      | 15 | 0.01 |
| <b>eczema impetiginized</b>                     | 15 | 0.01 |
| <b>eczema scrotum</b>                           | 15 | 0.01 |
| <b>eczema vulva</b>                             | 15 | 0.01 |
| <b>psoriasis infants</b>                        | 15 | 0.01 |
| <b>warts plantaris</b>                          | 15 | 0.01 |
| <b>atopic dermatitis hyperlinear creases</b>    | 14 | 0.01 |
| <b>lichen planus vaginal</b>                    | 14 | 0.01 |
| <b>mononucleosis ampicillin syndrome</b>        | 14 | 0.01 |
| <b>warts plane</b>                              | 14 | 0.01 |
| <b>cosmetic fragrance allergy</b>               | 13 | 0.01 |
| <b>elephantiasis nostras verrucosa</b>          | 13 | 0.01 |
| <b>lupus miliaris disseminatus faciei</b>       | 13 | 0.01 |
| <b>morphoea localized</b>                       | 13 | 0.01 |
| <b>uvl burn</b>                                 | 13 | 0.01 |
| <b>wound dehiscence</b>                         | 13 | 0.01 |
| <b>alopecia acquisitum centrifugum</b>          | 12 | 0.01 |
| <b>hematogenous allergic contact dermatitis</b> | 12 | 0.01 |
| <b>herpes immunocompromised</b>                 | 12 | 0.01 |
| <b>herpes simplex oralis</b>                    | 12 | 0.01 |

|                                                     |    |      |
|-----------------------------------------------------|----|------|
| <b>hyperkeratotic fissured hand and foot eczema</b> | 12 | 0.01 |
| <b>lupus erythematosus mucosae oris</b>             | 12 | 0.01 |
| <b>polychondritis</b>                               | 12 | 0.01 |
| <b>pterygium inversum unguis</b>                    | 12 | 0.01 |
| <b>syringolymphoid hyperplasia with alopecia</b>    | 12 | 0.01 |
| <b>tinea ringworm border</b>                        | 12 | 0.01 |
| <b>lichen planus palm soles</b>                     | 11 | 0.01 |
| <b>pachyonychia congenita hereditaria</b>           | 11 | 0.01 |
| <b>phlebitis superficial</b>                        | 11 | 0.01 |
| <b>psoriasis hiv</b>                                | 11 | 0.01 |
| <b>blue nails minocycline</b>                       | 10 | 0.01 |
| <b>chronic cutaneous graft versus host reaction</b> | 10 | 0.01 |
| <b>folliculitis of barbae</b>                       | 10 | 0.01 |
| <b>lichen planus annularis</b>                      | 10 | 0.01 |
| <b>lymphangitis acute lymphangitis</b>              | 10 | 0.01 |
| <b>onychogryphosis and onychauxis</b>               | 10 | 0.01 |
| <b>primary tufted hairs</b>                         | 10 | 0.01 |
| <b>ulcus cruris mixtum</b>                          | 10 | 0.01 |
| <b>contact dermatitis leg ulcers</b>                | 9  | 0.01 |
| <b>lingua plicata</b>                               | 9  | 0.01 |
| <b>pemphigus foliaceus localized form</b>           | 9  | 0.01 |
| <b>portuguese man of war dermatitis</b>             | 9  | 0.01 |
| <b>psoriasis psoriasis after erysipelas</b>         | 9  | 0.01 |
| <b>shaving folliculitis</b>                         | 9  | 0.01 |
| <b>ulcus cruris venosum</b>                         | 9  | 0.01 |
| <b>zoster gangraenosus</b>                          | 9  | 0.01 |
| <b>eczema microbic</b>                              | 8  | 0.01 |
| <b>pemphigus seborrhoicus</b>                       | 8  | 0.01 |
| <b>pemphigus vegetant</b>                           | 8  | 0.01 |
| <b>tinea barbae profunda</b>                        | 8  | 0.01 |
| <b>drug lichenoid eruption</b>                      | 7  | 0.01 |
| <b>primary herpes simplex virus</b>                 | 7  | 0.01 |

|                                 |                                                     |      |      |
|---------------------------------|-----------------------------------------------------|------|------|
|                                 | superficial fungal infections                       | 7    | 0.01 |
|                                 | lipoatrophy postherpetic lipoatrophy                | 6    | 0.00 |
|                                 | psoriasis digits                                    | 6    | 0.00 |
|                                 | tinea capitis profunda                              | 6    | 0.00 |
|                                 | tinea capitis superficialis                         | 6    | 0.00 |
|                                 | autoerythrocyte sensitization                       | 5    | 0.00 |
|                                 | lupus erythematosus systemic lupus erythematosus    | 5    | 0.00 |
|                                 | parasitosis psychogenic                             | 5    | 0.00 |
|                                 | natural rubber latex allergy                        | 4    | 0.00 |
|                                 | tinea ringworm nigra                                | 4    | 0.00 |
|                                 | cow pox                                             | 3    | 0.00 |
|                                 | lichen planus hypertrophicus                        | 3    | 0.00 |
|                                 | cat pox                                             | 1    | 0.00 |
|                                 | <hr/>                                               |      |      |
|                                 | systemic carcinomas                                 | 512  | 0.37 |
|                                 | intermediate or malignant vascular tumors           | 372  | 0.27 |
|                                 | dermatofibrosarcoma protuberans                     | 102  | 0.07 |
|                                 | merkel cell carcinoma                               | 71   | 0.05 |
|                                 | sarcoma                                             | 66   | 0.05 |
| <b>Malignant dermal tumor</b>   | abrikossofs tumour of skin                          | 22   | 0.02 |
|                                 | malignant adnexal tumors                            | 21   | 0.02 |
|                                 | soft tissue tumors                                  | 15   | 0.01 |
|                                 | adenocarcinoma in the submandibular salivary glands | 5    | 0.00 |
|                                 | <hr/>                                               |      |      |
|                                 | melanocytic nevi                                    | 1513 | 1.09 |
|                                 | blue nevus                                          | 694  | 0.50 |
|                                 | atypical nevi                                       | 528  | 0.38 |
|                                 | intra dermal nevus                                  | 439  | 0.32 |
|                                 | nevus cell nevus                                    | 332  | 0.24 |
| <b>Pigmented lesions benign</b> | congenital nevus                                    | 267  | 0.19 |
|                                 | halo nevus                                          | 237  | 0.17 |
|                                 | solar lentigo                                       | 205  | 0.15 |
|                                 | nevocytic nevus                                     | 183  | 0.13 |
|                                 | nevus spilus                                        | 108  | 0.08 |

|                                    |                                      |      |      |
|------------------------------------|--------------------------------------|------|------|
|                                    | nevus incipiens                      | 105  | 0.08 |
|                                    | café au lait spot                    | 90   | 0.06 |
|                                    | melanosis neurocutanea               | 78   | 0.06 |
|                                    | mongolian spot                       | 67   | 0.05 |
|                                    | giant melanocytic nevus              | 62   | 0.04 |
|                                    | black heel                           | 61   | 0.04 |
|                                    | naevus blue                          | 57   | 0.04 |
|                                    | melanoma mimic                       | 52   | 0.04 |
|                                    | combined nevus                       | 51   | 0.04 |
|                                    | melanonychia striata                 | 51   | 0.04 |
|                                    | blue nevus ota                       | 48   | 0.03 |
|                                    | mucosal lentigines                   | 47   | 0.03 |
|                                    | naevus halo                          | 45   | 0.03 |
|                                    | spitz nevus                          | 40   | 0.03 |
|                                    | ephelides                            | 38   | 0.03 |
|                                    | hereditary dysplastic nevus syndrome | 37   | 0.03 |
|                                    | spindle cell nevus                   | 36   | 0.03 |
|                                    | melanotic macule                     | 33   | 0.02 |
|                                    | naevus achromic                      | 33   | 0.02 |
|                                    | lentigo simplex                      | 29   | 0.02 |
|                                    | lentigo senilis                      | 27   | 0.02 |
|                                    | nevus pigmentosus et pilosus         | 27   | 0.02 |
|                                    | nail nevus                           | 22   | 0.02 |
|                                    | nevus repigmented                    | 22   | 0.02 |
|                                    | ink spot nevus                       | 16   | 0.01 |
|                                    | naevus of ota bilateral type         | 15   | 0.01 |
|                                    | naevus giant pigmented               | 11   | 0.01 |
|                                    | labial melanotic macule              | 7    | 0.01 |
|                                    | <hr/>                                |      |      |
|                                    | malignant melanoma                   | 1890 | 1.36 |
|                                    | superficial spreading melanoma ssm   | 312  | 0.23 |
| <b>Pigmented lesions malignant</b> | lentigo maligna                      | 216  | 0.16 |
|                                    | lentigo maligna melanoma             | 122  | 0.09 |
|                                    | nodular melanoma nm                  | 78   | 0.06 |

|                                          |        |        |
|------------------------------------------|--------|--------|
| <b>metastatic melanoma</b>               | 68     | 0.05   |
| <b>amelanotic malignant melanoma amm</b> | 61     | 0.04   |
| <b>nail melanoma</b>                     | 61     | 0.04   |
| <b>acrolentiginous melanoma alm</b>      | 44     | 0.03   |
| <b>malignant melanoma metastatic</b>     | 22     | 0.02   |
| <b>mucosal melanoma</b>                  | 12     | 0.01   |
| <b>melanoma of the parotid</b>           | 11     | 0.01   |
| <hr/>                                    |        |        |
| <b>Unknown</b>                           | 7670   | 5.54   |
| <hr/>                                    |        |        |
| <b>All</b>                               | 138522 | 100.00 |
| <hr/>                                    |        |        |

Supplementary Table 2: Frequency Table and False Positive Rates of Diagnoses in the non-MPXV testing cohort

Frequency table of diagnoses and False Positive Rates of evaluated skin lesion images in the repositories and datasets comprising the non-MPXV testing cohort (Esteva, Danderm, DermIS, DermNet, Fitzpatrick 17k, HDA, and PAD-uefs 20)

All, Number of all evaluated skin lesion images in the non-MPXV testing cohort; FPR, False positive rate; MPXV, Mpox virus; n, Number of occurrences of diagnosis; Unknown, Diagnosis unknown or unmapped; %, Percentage of diagnosis in relation to all evaluated skin lesion images in the non-MPXV testing cohort.

| Category                              | Diagnosis             | n   | %    | FPR   |
|---------------------------------------|-----------------------|-----|------|-------|
|                                       | pilar cyst            | 877 | 0.69 | 14.25 |
|                                       | skin tag              | 711 | 0.56 | 17.86 |
|                                       | hemangioma            | 655 | 0.52 | 12.06 |
|                                       | pyogenic granuloma    | 541 | 0.43 | 10.54 |
|                                       | dermatofibroma        | 526 | 0.42 | 15.97 |
|                                       | fibroma               | 470 | 0.37 | 18.51 |
|                                       | telangiectases        | 455 | 0.36 | 9.23  |
|                                       | syringoma             | 390 | 0.31 | 7.18  |
|                                       | sebaceous hyperplasia | 362 | 0.29 | 8.01  |
|                                       | fordyce spots         | 318 | 0.25 | 11.01 |
|                                       | mucous cyst           | 305 | 0.24 | 12.79 |
|                                       | becker nevus          | 226 | 0.18 | 15.93 |
| Benign dermal tumors cysts<br>sinuses | lymphangioma          | 211 | 0.17 | 9.48  |
|                                       | angiokeratomas        | 167 | 0.13 | 11.98 |
|                                       | pilomatricoma         | 150 | 0.12 | 12.67 |
|                                       | adenoma sebaceum      | 131 | 0.10 | 12.21 |
|                                       | venous lake           | 123 | 0.10 | 6.50  |
|                                       | port wine stain       | 114 | 0.09 | 7.89  |
|                                       | venous malformations  | 108 | 0.09 | 4.63  |
|                                       | trichoepithelioma     | 101 | 0.08 | 9.90  |
|                                       | granuloma pyogenic    | 97  | 0.08 | 6.19  |
|                                       | granulation tissue    | 95  | 0.08 | 3.16  |
|                                       | leiomyoma             | 90  | 0.07 | 6.67  |
|                                       | myxoid cyst           | 84  | 0.07 | 4.76  |

|                                                  |    |      |       |
|--------------------------------------------------|----|------|-------|
| <b>angioma</b>                                   | 83 | 0.07 | 12.05 |
| <b>hidrocystoma</b>                              | 83 | 0.07 | 7.23  |
| <b>haemangioma</b>                               | 76 | 0.06 | 19.74 |
| <b>cherry angioma</b>                            | 75 | 0.06 | 26.67 |
| <b>hemangioma infancy</b>                        | 67 | 0.05 | 11.94 |
| <b>nevus lipomatosis</b>                         | 65 | 0.05 | 26.15 |
| <b>scrotal cyst</b>                              | 64 | 0.05 | 26.56 |
| <b>spider angioma</b>                            | 63 | 0.05 | 12.70 |
| <b>apocrine hydrocystoma</b>                     | 59 | 0.05 | 5.08  |
| <b>steatocystoma multiplex</b>                   | 58 | 0.05 | 17.24 |
| <b>trichofolliculoma</b>                         | 54 | 0.04 | 18.52 |
| <b>cylindroma</b>                                | 50 | 0.04 | 12.00 |
| <b>eccrine poroma</b>                            | 50 | 0.04 | 10.00 |
| <b>glomus tumor</b>                              | 50 | 0.04 | 10.00 |
| <b>spider nevus</b>                              | 49 | 0.04 | 16.33 |
| <b>dilated pore of winer</b>                     | 48 | 0.04 | 14.58 |
| <b>klippel treaunay syndrome</b>                 | 45 | 0.04 | 6.67  |
| <b>cutis marmorata telangiectatica congenita</b> | 43 | 0.03 | 6.98  |
| <b>ganglion</b>                                  | 41 | 0.03 | 19.51 |
| <b>chondroma</b>                                 | 40 | 0.03 | 5.00  |
| <b>nevus anemicus</b>                            | 37 | 0.03 | 8.11  |
| <b>eruptive vellus hair cysts</b>                | 35 | 0.03 | 14.29 |
| <b>acrotrichoma</b>                              | 34 | 0.03 | 23.53 |
| <b>dermoid cyst</b>                              | 33 | 0.03 | 9.09  |
| <b>infantile digital fibromatosis</b>            | 33 | 0.03 | 9.09  |
| <b>spiradenoma</b>                               | 33 | 0.03 | 6.06  |
| <b>pilonidal sinus</b>                           | 32 | 0.03 | 21.88 |
| <b>connective tissue nevus</b>                   | 30 | 0.02 | 6.67  |
| <b>strawberry hemangioma</b>                     | 29 | 0.02 | 3.45  |
| <b>neurolemmoma</b>                              | 28 | 0.02 | 7.14  |
| <b>ectopic respiratory epithelia</b>             | 26 | 0.02 | 0.00  |
| <b>nevus flammeus</b>                            | 25 | 0.02 | 16.00 |

|                                                             |                                         |      |      |       |
|-------------------------------------------------------------|-----------------------------------------|------|------|-------|
|                                                             | vascular anomaly                        | 24   | 0.02 | 16.67 |
|                                                             | collagen nevus                          | 23   | 0.02 | 26.09 |
|                                                             | dental sinus                            | 22   | 0.02 | 18.18 |
|                                                             | periungual fibroma                      | 21   | 0.02 | 14.29 |
|                                                             | endometriosis                           | 20   | 0.02 | 30.00 |
|                                                             | aponeurotic fibroma                     | 19   | 0.02 | 5.26  |
|                                                             | hemangioma racemosum                    | 19   | 0.02 | 15.79 |
|                                                             | myxoma                                  | 19   | 0.02 | 5.26  |
|                                                             | epithelioma adenoides cysticum          | 18   | 0.01 | 11.11 |
|                                                             | fibrolipoma                             | 17   | 0.01 | 0.00  |
|                                                             | arteriovenous malformation              | 16   | 0.01 | 12.50 |
|                                                             | lymphatic malformations                 | 16   | 0.01 | 6.25  |
|                                                             | trichoepithelioma papulosum multiplex   | 15   | 0.01 | 0.00  |
|                                                             | angioma serpiginosum                    | 14   | 0.01 | 21.43 |
|                                                             | cirroid aneurysm                        | 14   | 0.01 | 7.14  |
|                                                             | myofibromatosis                         | 13   | 0.01 | 23.08 |
|                                                             | trichoblastoma                          | 13   | 0.01 | 7.69  |
|                                                             | tenosynovitis nodular                   | 12   | 0.01 | 0.00  |
|                                                             | cyst synovial                           | 11   | 0.01 | 9.09  |
|                                                             | trichoadenoma                           | 10   | 0.01 | 10.00 |
|                                                             | perifollicular fibroma                  | 8    | 0.01 | 0.00  |
| <b>Cutaneous lymphoma and lymphoid infiltrates</b>          | cutaneous t cell lymphoma               | 744  | 0.59 | 9.14  |
|                                                             | lymphoma b cell                         | 155  | 0.12 | 4.52  |
|                                                             | lymphomatoid papulosis                  | 122  | 0.10 | 11.48 |
|                                                             | erythema arciforme et palpabile migrans | 27   | 0.02 | 7.41  |
|                                                             | pseudo lymphoma other types             | 23   | 0.02 | 0.00  |
|                                                             | lymphomas lymphocytic infiltrations     | 12   | 0.01 | 0.00  |
| <b>Epidermal tumors hamartomas milia and growths benign</b> | seborrheic keratosis                    | 1257 | 0.99 | 8.27  |
|                                                             | epidermal nevus                         | 860  | 0.68 | 9.19  |
|                                                             | porokeratosis                           | 585  | 0.46 | 3.59  |
|                                                             | seborrheic keratoses ruff               | 478  | 0.38 | 0.42  |
|                                                             | milia                                   | 427  | 0.34 | 16.39 |



|                                                     |                                          |      |      |       |
|-----------------------------------------------------|------------------------------------------|------|------|-------|
|                                                     | <b>benign keratosis</b>                  | 414  | 0.33 | 7.00  |
|                                                     | <b>prurigo nodularis</b>                 | 315  | 0.25 | 26.98 |
|                                                     | <b>seborrheic keratoses smooth</b>       | 156  | 0.12 | 0.00  |
|                                                     | <b>seborrheic keratosis irritated</b>    | 150  | 0.12 | 0.67  |
|                                                     | <b>dermatosis papulosa nigra</b>         | 92   | 0.07 | 10.87 |
|                                                     | <b>corns</b>                             | 88   | 0.07 | 7.95  |
|                                                     | <b>callus</b>                            | 76   | 0.06 | 5.26  |
|                                                     | <b>stucco keratoses</b>                  | 67   | 0.05 | 1.49  |
|                                                     | <b>acquired digital fibrokeratoma</b>    | 58   | 0.05 | 15.52 |
|                                                     | <b>stucco keratosis</b>                  | 35   | 0.03 | 5.71  |
|                                                     | <b>acral keratosis</b>                   | 34   | 0.03 | 11.76 |
|                                                     | <b>giant comedo</b>                      | 34   | 0.03 | 5.88  |
|                                                     | <b>keratosis seborrheic</b>              | 26   | 0.02 | 7.69  |
|                                                     | <b>clear cell acanthoma</b>              | 19   | 0.02 | 5.26  |
|                                                     | <b>leser trelat sign</b>                 | 19   | 0.02 | 0.00  |
|                                                     | <b>warty dyskeratoma</b>                 | 11   | 0.01 | 0.00  |
|                                                     | <b>basal cell carcinoma</b>              | 2430 | 1.92 | 11.69 |
|                                                     | <b>squamous cell carcinoma</b>           | 1251 | 0.99 | 12.47 |
|                                                     | <b>actinic keratosis</b>                 | 1041 | 0.82 | 17.77 |
|                                                     | <b>solar damage actinic keratosis</b>    | 951  | 0.75 | 4.21  |
|                                                     | <b>keratoacanthoma</b>                   | 776  | 0.61 | 8.76  |
|                                                     | <b>bowens disease</b>                    | 648  | 0.51 | 5.71  |
|                                                     | <b>cutaneous horn</b>                    | 197  | 0.16 | 7.61  |
|                                                     | <b>solid cystic basal cell carcinoma</b> | 168  | 0.13 | 4.76  |
| <b>Epidermal tumors pre malignant and malignant</b> | <b>actinic cheilitis</b>                 | 153  | 0.12 | 0.65  |
|                                                     | <b>basal cell carcinoma lesion</b>       | 138  | 0.11 | 2.90  |
|                                                     | <b>pagets disease</b>                    | 126  | 0.10 | 10.32 |
|                                                     | <b>leukoplakia</b>                       | 120  | 0.09 | 5.83  |
|                                                     | <b>basal cell carcinoma morpheiform</b>  | 115  | 0.09 | 2.61  |
|                                                     | <b>arsenical keratoses</b>               | 83   | 0.07 | 12.05 |
|                                                     | <b>erythroplasia queyrat</b>             | 81   | 0.06 | 11.11 |
|                                                     | <b>basal cell carcinoma nose</b>         | 79   | 0.06 | 5.06  |
|                                                     | <b>actinic keratosis face</b>            | 77   | 0.06 | 1.30  |

|                                             |    |      |       |
|---------------------------------------------|----|------|-------|
| <b>basal cell nevus syndrome</b>            | 76 | 0.06 | 13.16 |
| <b>actinic keratosis lesion</b>             | 66 | 0.05 | 3.03  |
| <b>basal cell carcinoma superficial</b>     | 65 | 0.05 | 0.00  |
| <b>solar damage</b>                         | 62 | 0.05 | 3.23  |
| <b>actinic keratosis fu</b>                 | 59 | 0.05 | 0.00  |
| <b>extramammary paget disease</b>           | 59 | 0.05 | 10.17 |
| <b>basal cell carcinoma lid</b>             | 55 | 0.04 | 5.45  |
| <b>basal cell carcinoma ear</b>             | 53 | 0.04 | 0.00  |
| <b>pigmented basal cell carcinoma</b>       | 52 | 0.04 | 5.77  |
| <b>basal cell carcinoma face</b>            | 50 | 0.04 | 6.00  |
| <b>verrucous carcinoma</b>                  | 49 | 0.04 | 2.04  |
| <b>actinic keratosis hand</b>               | 47 | 0.04 | 0.00  |
| <b>squamous cell carcinoma ear</b>          | 43 | 0.03 | 0.00  |
| <b>superficial basal cell carcinoma</b>     | 38 | 0.03 | 0.00  |
| <b>basal cell carcinoma ulcerating</b>      | 37 | 0.03 | 0.00  |
| <b>nevoid basal cell carcinoma syndrome</b> | 37 | 0.03 | 13.51 |
| <b>basal cell carcinoma lip</b>             | 36 | 0.03 | 2.78  |
| <b>solar damage actinex treatment</b>       | 36 | 0.03 | 2.78  |
| <b>keratosis solar</b>                      | 35 | 0.03 | 0.00  |
| <b>squamous cell carcinoma lesion</b>       | 34 | 0.03 | 5.88  |
| <b>carcinoma of lip</b>                     | 32 | 0.03 | 6.25  |
| <b>basal cell carcinoma scalp</b>           | 29 | 0.02 | 13.79 |
| <b>squamous cell carcinoma lip</b>          | 29 | 0.02 | 6.90  |
| <b>actinic keratosis ear</b>                | 28 | 0.02 | 0.00  |
| <b>hypertrophic actinic keratosis</b>       | 27 | 0.02 | 3.70  |
| <b>actinic keratosis horn</b>               | 26 | 0.02 | 3.85  |
| <b>leucoplakia praecancerosa</b>            | 23 | 0.02 | 0.00  |
| <b>ulcus terebrans</b>                      | 22 | 0.02 | 4.55  |
| <b>solar damage actinic cheilitis</b>       | 20 | 0.02 | 5.00  |
| <b>actinic keratosis nose</b>               | 17 | 0.01 | 0.00  |
| <b>basal cell carcinoma trunk ext</b>       | 15 | 0.01 | 13.33 |
| <b>squamous cell carcinoma nose</b>         | 15 | 0.01 | 0.00  |

|                                                     |                                                     |     |      |       |
|-----------------------------------------------------|-----------------------------------------------------|-----|------|-------|
|                                                     | <b>actinic keratosis pigmented</b>                  | 14  | 0.01 | 7.14  |
|                                                     | <b>squamous cell carcinoma hand arm</b>             | 12  | 0.01 | 0.00  |
|                                                     | <b>basal cell carcinoma aldera</b>                  | 11  | 0.01 | 18.18 |
|                                                     | <b>keratoacanthoma pendulum</b>                     | 11  | 0.01 | 18.18 |
|                                                     | <b>solar damage fu treatment</b>                    | 10  | 0.01 | 0.00  |
|                                                     | <b>squamous cell carcinoma face</b>                 | 10  | 0.01 | 0.00  |
|                                                     | <b>basal cell carcinoma sclerosing</b>              | 1   | 0.00 | 0.00  |
|                                                     | <b>neurofibromatosis</b>                            | 707 | 0.56 | 19.09 |
|                                                     | <b>epidermolysis bullosa</b>                        | 589 | 0.47 | 18.34 |
|                                                     | <b>dariers disease</b>                              | 530 | 0.42 | 6.42  |
|                                                     | <b>ichthyosis</b>                                   | 518 | 0.41 | 25.87 |
|                                                     | <b>tuberous sclerosis</b>                           | 341 | 0.27 | 16.13 |
|                                                     | <b>hailey hailey disease</b>                        | 286 | 0.23 | 4.20  |
|                                                     | <b>incontinentia pigmenti</b>                       | 224 | 0.18 | 16.96 |
|                                                     | <b>ichthyosis vulgaris</b>                          | 215 | 0.17 | 13.02 |
|                                                     | <b>ehlers danlos syndrome</b>                       | 199 | 0.16 | 47.74 |
|                                                     | <b>rendu osler syndrome</b>                         | 128 | 0.10 | 16.41 |
|                                                     | <b>acrodermatitis enteropathica</b>                 | 127 | 0.10 | 15.75 |
|                                                     | <b>xeroderma pigmentosum</b>                        | 118 | 0.09 | 13.56 |
|                                                     | <b>pseudoxanthoma elasticum</b>                     | 97  | 0.08 | 9.28  |
| <b>Genodermatoses and<br/>supernumerary growths</b> | <b>epidermolytic hyperkeratosis</b>                 | 86  | 0.07 | 4.65  |
|                                                     | <b>supernumerary growths</b>                        | 77  | 0.06 | 25.97 |
|                                                     | <b>collodion baby</b>                               | 75  | 0.06 | 21.33 |
|                                                     | <b>ichthyosis congenita</b>                         | 70  | 0.06 | 2.86  |
|                                                     | <b>vascular tumors and malformations</b>            | 67  | 0.05 | 10.45 |
|                                                     | <b>erythrokeratoderma variabilis</b>                | 65  | 0.05 | 15.38 |
|                                                     | <b>erythrokeratoderma progressive<br/>symmetric</b> | 63  | 0.05 | 14.29 |
|                                                     | <b>ichthyosis sex linked</b>                        | 62  | 0.05 | 0.00  |
|                                                     | <b>lipoid proteinosis urbach wiethe<br/>disease</b> | 58  | 0.05 | 13.79 |
|                                                     | <b>x linked ichthyosis</b>                          | 55  | 0.04 | 16.36 |
|                                                     | <b>leopard syndrome</b>                             | 54  | 0.04 | 14.81 |
|                                                     | <b>ichthyosis other forms</b>                       | 42  | 0.03 | 19.05 |

|                     |                                              |      |      |       |
|---------------------|----------------------------------------------|------|------|-------|
|                     | <b>congenital ichthyosiform erythroderma</b> | 41   | 0.03 | 2.44  |
|                     | <b>peutz jehers syndrome</b>                 | 41   | 0.03 | 9.76  |
|                     | <b>rothmund thomson syndrome</b>             | 41   | 0.03 | 7.32  |
|                     | <b>acrokeratoelastoidosis</b>                | 40   | 0.03 | 5.00  |
|                     | <b>ichthyosis dominant</b>                   | 38   | 0.03 | 0.00  |
|                     | <b>acrokeratosis verruciformis</b>           | 36   | 0.03 | 0.00  |
|                     | <b>albinism</b>                              | 34   | 0.03 | 11.76 |
|                     | <b>muir torre syndrome</b>                   | 34   | 0.03 | 8.82  |
|                     | <b>congenital erythropoietic porphyria</b>   | 29   | 0.02 | 10.34 |
|                     | <b>congenital dyskeratosis</b>               | 27   | 0.02 | 14.81 |
|                     | <b>birt hogg dube</b>                        | 25   | 0.02 | 4.00  |
|                     | <b>buschke ollendorf syndrome</b>            | 25   | 0.02 | 12.00 |
|                     | <b>cowden disease</b>                        | 23   | 0.02 | 8.70  |
|                     | <b>congenital anomalies</b>                  | 22   | 0.02 | 0.00  |
|                     | <b>sjgren larsson syndrome</b>               | 17   | 0.01 | 5.88  |
|                     | <b>laugier hunziker s syndrome</b>           | 15   | 0.01 | 6.67  |
|                     | <b>lamellar ichthyosis</b>                   | 13   | 0.01 | 30.77 |
|                     | <b>dyschromatosis universalis</b>            | 11   | 0.01 | 45.45 |
|                     | <b>ichthyosis hystrix</b>                    | 11   | 0.01 | 9.09  |
|                     | <b>erythrodermia exfoliativa leiner</b>      | 9    | 0.01 | 11.11 |
|                     | <b>gargoylism</b>                            | 9    | 0.01 | 33.33 |
|                     | <b>leprechaunism syndrome</b>                | 9    | 0.01 | 0.00  |
|                     | <b>phakomatosis pigmentovascularis</b>       | 7    | 0.01 | 0.00  |
|                     | <b>harlequin ichthyosis</b>                  | 6    | 0.00 | 16.67 |
|                     | <b>knuckle pads</b>                          | 6    | 0.00 | 0.00  |
|                     | <hr/>                                        |      |      |       |
|                     | <b>acne vulgaris</b>                         | 2273 | 1.80 | 16.01 |
|                     | <b>psoriasis</b>                             | 1404 | 1.11 | 7.48  |
|                     | <b>lichen planus</b>                         | 1229 | 0.97 | 6.92  |
| <b>Inflammatory</b> | <b>rosacea</b>                               | 1110 | 0.88 | 7.57  |
|                     | <b>eczema</b>                                | 1066 | 0.84 | 16.51 |
|                     | <b>herpes zoster</b>                         | 1036 | 0.82 | 11.58 |
|                     | <b>scabies</b>                               | 994  | 0.79 | 13.08 |

|                                                                          |     |      |       |
|--------------------------------------------------------------------------|-----|------|-------|
| leprosy                                                                  | 942 | 0.74 | 19.75 |
| erythema multiforme and fixed drug eruptions                             | 935 | 0.74 | 11.34 |
| pigmentation diseases                                                    | 929 | 0.73 | 15.72 |
| drug eruption                                                            | 911 | 0.72 | 7.14  |
| lichen                                                                   | 911 | 0.72 | 10.76 |
| photodermatoses                                                          | 909 | 0.72 | 8.80  |
| seborrheic dermatitis                                                    | 890 | 0.70 | 9.89  |
| onychomycosis                                                            | 882 | 0.70 | 2.15  |
| allergic contact dermatitis                                              | 864 | 0.68 | 6.48  |
| syphilis                                                                 | 834 | 0.66 | 16.91 |
| vasculitis                                                               | 811 | 0.64 | 8.01  |
| non scarring alopecia                                                    | 782 | 0.62 | 10.87 |
| depositional diseases calcinosis cutis amyloid mucinosis gout and others | 776 | 0.61 | 13.40 |
| sunburn                                                                  | 754 | 0.60 | 26.92 |
| scarring                                                                 | 750 | 0.59 | 10.67 |
| atrophic skin disease striae and elastic fiber disorders                 | 747 | 0.59 | 16.20 |
| impetigo                                                                 | 740 | 0.59 | 13.78 |
| sarcoidosis                                                              | 720 | 0.57 | 7.50  |
| fungal infections dermal and subcut                                      | 718 | 0.57 | 13.51 |
| tinea corporis                                                           | 716 | 0.57 | 9.08  |
| hair disorder trichorrhexis nodosa etc                                   | 709 | 0.56 | 10.86 |
| alopecia                                                                 | 704 | 0.56 | 23.15 |
| molluscum contagiosum                                                    | 703 | 0.56 | 27.31 |
| scarring alopecia                                                        | 703 | 0.56 | 9.82  |
| urticaria                                                                | 683 | 0.54 | 10.98 |
| granuloma annulare                                                       | 679 | 0.54 | 5.89  |
| tick bite                                                                | 667 | 0.53 | 26.39 |
| pustular skin disease non infectious                                     | 656 | 0.52 | 5.64  |
| malformations of extremities                                             | 653 | 0.52 | 7.20  |
| folliculitis                                                             | 639 | 0.51 | 22.54 |
| pityriasis rosea                                                         | 606 | 0.48 | 9.08  |

|                                                            |     |      |       |
|------------------------------------------------------------|-----|------|-------|
| <b>candidiasis</b>                                         | 551 | 0.44 | 7.80  |
| <b>dermatomyositis</b>                                     | 540 | 0.43 | 7.96  |
| <b>bullous pemphigoid</b>                                  | 524 | 0.41 | 11.45 |
| <b>histiocytic disorders and proliferations</b>            | 523 | 0.41 | 15.11 |
| <b>tinea pedis</b>                                         | 515 | 0.41 | 4.27  |
| <b>gyrate erythemas</b>                                    | 510 | 0.40 | 8.04  |
| <b>perioral dermatitis</b>                                 | 504 | 0.40 | 3.77  |
| <b>xanthomas</b>                                           | 493 | 0.39 | 15.01 |
| <b>factitial dermatitis</b>                                | 488 | 0.39 | 12.09 |
| <b>lichen sclerosus skin</b>                               | 483 | 0.38 | 11.18 |
| <b>pityriasis rubra pilaris</b>                            | 480 | 0.38 | 4.79  |
| <b>lupus acute</b>                                         | 477 | 0.38 | 19.50 |
| <b>scleroderma</b>                                         | 476 | 0.38 | 14.71 |
| <b>nematode infection</b>                                  | 462 | 0.37 | 10.39 |
| <b>stasis ulcer</b>                                        | 459 | 0.36 | 2.83  |
| <b>keratosis pilaris and related follicular disorders</b>  | 441 | 0.35 | 4.76  |
| <b>mastocytosis</b>                                        | 430 | 0.34 | 7.44  |
| <b>dyshidrotic eczema</b>                                  | 416 | 0.33 | 4.81  |
| <b>lichen simplex</b>                                      | 416 | 0.33 | 12.74 |
| <b>panniculitis lipodystrophy and diseases of subcutis</b> | 412 | 0.33 | 12.62 |
| <b>herpes simplex</b>                                      | 406 | 0.32 | 12.32 |
| <b>diaper dermatitis</b>                                   | 401 | 0.32 | 11.47 |
| <b>metabolic and nutritional diseases</b>                  | 390 | 0.31 | 22.31 |
| <b>cheilitis</b>                                           | 385 | 0.30 | 6.75  |
| <b>rhinophyma</b>                                          | 383 | 0.30 | 7.57  |
| <b>pediculosis lids</b>                                    | 382 | 0.30 | 9.95  |
| <b>dermatitis herpetiformis</b>                            | 370 | 0.29 | 13.24 |
| <b>atopic dermatitis feet</b>                              | 367 | 0.29 | 4.63  |
| <b>necrobiosis lipoidica</b>                               | 355 | 0.28 | 4.51  |
| <b>atopic dermatitis adult phase</b>                       | 345 | 0.27 | 2.61  |
| <b>porphyria</b>                                           | 345 | 0.27 | 11.01 |

|                                                       |     |      |       |
|-------------------------------------------------------|-----|------|-------|
| <b>acanthosis nigricans and carp</b>                  | 344 | 0.27 | 12.50 |
| <b>hidradenitis</b>                                   | 339 | 0.27 | 22.42 |
| <b>psoriasis chronic plaque</b>                       | 337 | 0.27 | 2.37  |
| <b>morphea</b>                                        | 336 | 0.27 | 8.63  |
| <b>cutaneous manifestations of systemic disease</b>   | 328 | 0.26 | 16.77 |
| <b>lupus subacute</b>                                 | 327 | 0.26 | 8.87  |
| <b>toxic epidermal necrolysis and stevens johnson</b> | 320 | 0.25 | 9.38  |
| <b>dry skin eczema</b>                                | 317 | 0.25 | 3.79  |
| <b>varicella</b>                                      | 312 | 0.25 | 34.62 |
| <b>condyloma acuminata</b>                            | 308 | 0.24 | 16.88 |
| <b>eczema hand</b>                                    | 300 | 0.24 | 1.00  |
| <b>erysipelas</b>                                     | 294 | 0.23 | 8.84  |
| <b>pemphigus</b>                                      | 292 | 0.23 | 9.93  |
| <b>genital warts</b>                                  | 286 | 0.23 | 17.13 |
| <b>tinea versicolor</b>                               | 286 | 0.23 | 9.79  |
| <b>stasis dermatitis</b>                              | 284 | 0.22 | 2.11  |
| <b>sun damaged skin</b>                               | 282 | 0.22 | 9.57  |
| <b>solar elastosis</b>                                | 274 | 0.22 | 10.58 |
| <b>pemphigus vulgaris</b>                             | 273 | 0.22 | 5.86  |
| <b>shoe allergy</b>                                   | 266 | 0.21 | 25.19 |
| <b>virus exanthem</b>                                 | 265 | 0.21 | 5.28  |
| <b>pityriasis versicolor</b>                          | 262 | 0.21 | 9.92  |
| <b>contact dermatitis</b>                             | 261 | 0.21 | 4.60  |
| <b>tinea capitis</b>                                  | 261 | 0.21 | 6.90  |
| <b>pityriasis lichenoides and pleva</b>               | 252 | 0.20 | 13.49 |
| <b>diseases of the ear</b>                            | 250 | 0.20 | 6.80  |
| <b>erythroderma</b>                                   | 243 | 0.19 | 6.17  |
| <b>eczema nummular</b>                                | 241 | 0.19 | 3.32  |
| <b>reiters disease</b>                                | 240 | 0.19 | 7.92  |
| <b>eczema herpeticum</b>                              | 236 | 0.19 | 8.90  |
| <b>paronychia</b>                                     | 236 | 0.19 | 2.12  |
| <b>atopic dermatitis</b>                              | 231 | 0.18 | 8.66  |

|                                      |     |      |       |
|--------------------------------------|-----|------|-------|
| <b>pigmented purpuric dermatosis</b> | 228 | 0.18 | 4.82  |
| <b>pernio and mimics</b>             | 226 | 0.18 | 7.96  |
| <b>tinea cruris</b>                  | 226 | 0.18 | 24.78 |
| <b>tinea ringworm body</b>           | 219 | 0.17 | 9.13  |
| <b>hand foot mouth</b>               | 214 | 0.17 | 20.09 |
| <b>irritant contact dermatitis</b>   | 213 | 0.17 | 5.63  |
| <b>livedo reticularis</b>            | 211 | 0.17 | 6.16  |
| <b>solar purpura</b>                 | 211 | 0.17 | 5.21  |
| <b>biting fleas</b>                  | 209 | 0.17 | 11.96 |
| <b>pityrosporum folliculitis</b>     | 206 | 0.16 | 11.65 |
| <b>solar damage atrophy</b>          | 206 | 0.16 | 16.02 |
| <b>neurotic excoriations</b>         | 204 | 0.16 | 20.10 |
| <b>onycholysis</b>                   | 203 | 0.16 | 2.46  |
| <b>tinea ringworm versicolor</b>     | 203 | 0.16 | 6.90  |
| <b>tungiasis</b>                     | 202 | 0.16 | 15.84 |
| <b>tuberculosis</b>                  | 199 | 0.16 | 10.05 |
| <b>acne cystic</b>                   | 198 | 0.16 | 6.57  |
| <b>psoriasis palms soles</b>         | 192 | 0.15 | 2.60  |
| <b>planar warts</b>                  | 185 | 0.15 | 5.95  |
| <b>misuse dermatitis</b>             | 184 | 0.15 | 7.61  |
| <b>pitted keratolysis</b>            | 181 | 0.14 | 4.42  |
| <b>rhus dermatitis</b>               | 181 | 0.14 | 0.55  |
| <b>acne keloidalis</b>               | 180 | 0.14 | 23.33 |
| <b>lupus chronic cutaneous</b>       | 180 | 0.14 | 8.33  |
| <b>insect bite</b>                   | 174 | 0.14 | 17.24 |
| <b>atopic eczema</b>                 | 173 | 0.14 | 6.36  |
| <b>furuncle</b>                      | 173 | 0.14 | 21.97 |
| <b>discoid lupus erythematosus</b>   | 171 | 0.14 | 19.30 |
| <b>neurodermatitis</b>               | 170 | 0.13 | 7.65  |
| <b>stasis dermatitis and ulcers</b>  | 169 | 0.13 | 0.00  |
| <b>warts</b>                         | 168 | 0.13 | 7.74  |
| <b>gianotti crosti</b>               | 167 | 0.13 | 14.97 |
| <b>eczema fingertips</b>             | 166 | 0.13 | 0.00  |



|                                          |     |      |       |
|------------------------------------------|-----|------|-------|
| <b>intertrigo</b>                        | 166 | 0.13 | 14.46 |
| <b>verruca vulgaris</b>                  | 165 | 0.13 | 12.12 |
| <b>tattoo and foreign body reactions</b> | 159 | 0.13 | 9.43  |
| <b>perforating disorders</b>             | 156 | 0.12 | 8.33  |
| <b>lichen nitidus</b>                    | 155 | 0.12 | 8.39  |
| <b>herpes type recurrent</b>             | 154 | 0.12 | 8.44  |
| <b>scleromyxedema</b>                    | 148 | 0.12 | 4.73  |
| <b>stasis edema</b>                      | 148 | 0.12 | 4.73  |
| <b>tinea manus</b>                       | 146 | 0.12 | 1.37  |
| <b>scarlet fever</b>                     | 144 | 0.11 | 4.17  |
| <b>balanitis</b>                         | 143 | 0.11 | 6.29  |
| <b>cellulitis</b>                        | 143 | 0.11 | 9.79  |
| <b>psoriasis scalp</b>                   | 143 | 0.11 | 4.20  |
| <b>leukocytoclastic vasculitis</b>       | 142 | 0.11 | 11.27 |
| <b>warts vulgaris</b>                    | 141 | 0.11 | 9.93  |
| <b>behcets disease</b>                   | 140 | 0.11 | 19.29 |
| <b>herpes type primary</b>               | 139 | 0.11 | 12.23 |
| <b>ashy dermatosis</b>                   | 137 | 0.11 | 13.87 |
| <b>nail psoriasis</b>                    | 136 | 0.11 | 3.68  |
| <b>grovers disease</b>                   | 134 | 0.11 | 5.97  |
| <b>clubbing</b>                          | 132 | 0.10 | 3.03  |
| <b>radiodermatitis</b>                   | 132 | 0.10 | 7.58  |
| <b>hypereosinophilic syndrome</b>        | 131 | 0.10 | 4.58  |
| <b>bacterial infections</b>              | 130 | 0.10 | 3.08  |
| <b>herpes cutaneous</b>                  | 130 | 0.10 | 11.54 |
| <b>ingrown nail</b>                      | 128 | 0.10 | 5.47  |
| <b>pemphigus foliaceus</b>               | 128 | 0.10 | 5.47  |
| <b>id reaction</b>                       | 127 | 0.10 | 5.51  |
| <b>psoriasis nails</b>                   | 127 | 0.10 | 3.94  |
| <b>psoriasis guttate</b>                 | 126 | 0.10 | 7.14  |
| <b>solar damage favre racouchot</b>      | 126 | 0.10 | 7.14  |
| <b>tinea ringworm groin</b>              | 126 | 0.10 | 39.68 |
| <b>dermographia</b>                      | 124 | 0.10 | 4.84  |

|                                               |     |      |       |
|-----------------------------------------------|-----|------|-------|
| <b>acquired autoimmune bullous disease</b>    | 122 | 0.10 | 8.20  |
| <b>herpes gestationis</b>                     |     |      |       |
| <b>beaus lines</b>                            | 122 | 0.10 | 5.74  |
| <b>lupus vulgaris</b>                         | 121 | 0.10 | 6.61  |
| <b>atopic dermatitis infant phase</b>         | 120 | 0.09 | 10.83 |
| <b>median nail dystrophy</b>                  | 120 | 0.09 | 4.17  |
| <b>eczema subacute</b>                        | 118 | 0.09 | 8.47  |
| <b>tinea faciale</b>                          | 118 | 0.09 | 14.41 |
| <b>warts common</b>                           | 117 | 0.09 | 9.40  |
| <b>patch testing</b>                          | 116 | 0.09 | 12.93 |
| <b>subacute cutaneous lupus erythematosus</b> | 116 | 0.09 | 0.86  |
| <b>scleroderma</b>                            |     |      |       |
| <b>warts plantar</b>                          | 116 | 0.09 | 6.90  |
| <b>chronic recurrent aphthae</b>              | 115 | 0.09 | 12.17 |
| <b>erythema ab igne</b>                       | 114 | 0.09 | 7.89  |
| <b>henoch schonlein purpura</b>               | 114 | 0.09 | 7.89  |
| <b>inverse psoriasis</b>                      | 114 | 0.09 | 12.28 |
| <b>atopic dermatitis childhood phase</b>      | 111 | 0.09 | 6.31  |
| <b>pemphigus foliaceus</b>                    | 111 | 0.09 | 0.90  |
| <b>eczema foot</b>                            | 109 | 0.09 | 0.00  |
| <b>herpes gestationis</b>                     | 109 | 0.09 | 13.76 |
| <b>lymphedema</b>                             | 108 | 0.09 | 11.11 |
| <b>staphylococcal scalded skin syndrome</b>   | 108 | 0.09 | 14.81 |
| <b>myiasis</b>                                | 107 | 0.08 | 28.97 |
| <b>nail diseases</b>                          | 107 | 0.08 | 6.54  |
| <b>thermal burn</b>                           | 107 | 0.08 | 4.67  |
| <b>tinea faciei</b>                           | 107 | 0.08 | 11.21 |
| <b>angioedema</b>                             | 106 | 0.08 | 11.32 |
| <b>raynauds disease</b>                       | 106 | 0.08 | 5.66  |
| <b>crest syndrome</b>                         | 105 | 0.08 | 6.67  |
| <b>herpes simplex analis</b>                  | 105 | 0.08 | 5.71  |
| <b>subacute cutaneous lupus erythematosus</b> | 105 | 0.08 | 20.00 |
| <b>nummular eczema</b>                        | 104 | 0.08 | 6.73  |

|                                                |     |      |       |
|------------------------------------------------|-----|------|-------|
| <b>papulose bowenoide</b>                      | 104 | 0.08 | 16.35 |
| <b>purpura</b>                                 | 103 | 0.08 | 6.80  |
| <b>tinea nigra</b>                             | 103 | 0.08 | 4.85  |
| <b>geographic tongue</b>                       | 102 | 0.08 | 3.92  |
| <b>erythrasma</b>                              | 101 | 0.08 | 19.80 |
| <b>miliaria</b>                                | 101 | 0.08 | 4.95  |
| <b>rosacea nose</b>                            | 101 | 0.08 | 4.95  |
| <b>lupus erythematosus chronicus discoides</b> | 100 | 0.08 | 10.00 |
| <b>pseudofolliculitis barbae</b>               | 100 | 0.08 | 17.00 |
| <b>urticaria acute</b>                         | 100 | 0.08 | 4.00  |
| <b>acne pustular</b>                           | 99  | 0.08 | 9.09  |
| <b>pincer nails</b>                            | 99  | 0.08 | 10.10 |
| <b>erythema infectiosum</b>                    | 97  | 0.08 | 9.28  |
| <b>psoriasis hand</b>                          | 97  | 0.08 | 3.09  |
| <b>psoriasis inversa</b>                       | 95  | 0.08 | 4.21  |
| <b>acne excoriee</b>                           | 94  | 0.07 | 13.83 |
| <b>steroid acne</b>                            | 94  | 0.07 | 13.83 |
| <b>neurotrophic ulcer</b>                      | 93  | 0.07 | 10.75 |
| <b>spider bite</b>                             | 93  | 0.07 | 25.81 |
| <b>tinea ringworm face</b>                     | 93  | 0.07 | 3.23  |
| <b>diabetic ulcer</b>                          | 92  | 0.07 | 9.78  |
| <b>poikiloderma civatte</b>                    | 92  | 0.07 | 2.17  |
| <b>habit tic deformity</b>                     | 89  | 0.07 | 7.87  |
| <b>pseudomonas</b>                             | 89  | 0.07 | 4.49  |
| <b>ulcer</b>                                   | 89  | 0.07 | 2.25  |
| <b>progressive systemic scleroderma</b>        | 88  | 0.07 | 6.82  |
| <b>epidermodysplasia verruciformis</b>         | 85  | 0.07 | 9.41  |
| <b>acne conglobata</b>                         | 84  | 0.07 | 9.52  |
| <b>tinea ringworm foot webs</b>                | 82  | 0.06 | 3.66  |
| <b>erythema elevatum diutinum</b>              | 81  | 0.06 | 8.64  |
| <b>leukonychia</b>                             | 81  | 0.06 | 3.70  |
| <b>splinter hemorrhage</b>                     | 80  | 0.06 | 7.50  |

|                                                   |    |      |       |
|---------------------------------------------------|----|------|-------|
| <b>terry nails</b>                                | 80 | 0.06 | 3.75  |
| <b>wet to dry foot syndrome</b>                   | 80 | 0.06 | 5.00  |
| <b>chronic bullous disease of childhood</b>       | 79 | 0.06 | 21.52 |
| <b>pigmented bands</b>                            | 79 | 0.06 | 11.39 |
| <b>warts flat</b>                                 | 79 | 0.06 | 3.80  |
| <b>measles</b>                                    | 78 | 0.06 | 6.41  |
| <b>tinea ringworm scalp</b>                       | 78 | 0.06 | 6.41  |
| <b>acne closed comedo</b>                         | 77 | 0.06 | 3.90  |
| <b>diseases of the eye</b>                        | 77 | 0.06 | 2.60  |
| <b>keratolysis exfoliativa</b>                    | 77 | 0.06 | 0.00  |
| <b>tinea ringworm hand dorsum</b>                 | 76 | 0.06 | 2.63  |
| <b>acne open comedo</b>                           | 75 | 0.06 | 2.67  |
| <b>hairy tongue</b>                               | 75 | 0.06 | 13.33 |
| <b>psoriasis treatment</b>                        | 74 | 0.06 | 8.11  |
| <b>nail dystrophy</b>                             | 73 | 0.06 | 8.22  |
| <b>gonorrhoea</b>                                 | 72 | 0.06 | 19.44 |
| <b>scalp psoriasis</b>                            | 72 | 0.06 | 2.78  |
| <b>tinea ringworm laboratory</b>                  | 72 | 0.06 | 4.17  |
| <b>cimicosis</b>                                  | 71 | 0.06 | 12.68 |
| <b>herpetic sycosis</b>                           | 71 | 0.06 | 21.13 |
| <b>hyperhidrosis</b>                              | 71 | 0.06 | 2.82  |
| <b>enterovirus</b>                                | 70 | 0.06 | 14.29 |
| <b>koilonychia</b>                                | 70 | 0.06 | 0.00  |
| <b>tinea ringworm foot dorsum</b>                 | 70 | 0.06 | 0.00  |
| <b>guttate psoriasis</b>                          | 69 | 0.05 | 14.49 |
| <b>rheumatoid nodule</b>                          | 69 | 0.05 | 24.64 |
| <b>chancroid</b>                                  | 68 | 0.05 | 17.65 |
| <b>lichen planus oral</b>                         | 68 | 0.05 | 8.82  |
| <b>desquamation</b>                               | 67 | 0.05 | 2.99  |
| <b>pemphigus vegetans</b>                         | 67 | 0.05 | 5.97  |
| <b>psoriasis vulgaris chronic stationary type</b> | 67 | 0.05 | 2.99  |
| <b>tinea faciei</b>                               | 67 | 0.05 | 7.46  |

|                                             |    |      |       |
|---------------------------------------------|----|------|-------|
| diseases of bone                            | 66 | 0.05 | 4.55  |
| epidermolysis bullosa acquisita             | 65 | 0.05 | 15.38 |
| fibromatosis                                | 64 | 0.05 | 12.50 |
| lichen striatus                             | 64 | 0.05 | 9.38  |
| panarteritis nodosa kussmaul maier          | 64 | 0.05 | 7.81  |
| candidiasis chronic mucocutaneos            | 63 | 0.05 | 9.52  |
| myxoedema pretibial                         | 63 | 0.05 | 7.94  |
| warts periungual                            | 63 | 0.05 | 3.17  |
| twenty nail dystrophy                       | 62 | 0.05 | 3.23  |
| eosinophilic pustular folliculitis          | 61 | 0.05 | 13.11 |
| onychogryphosis                             | 60 | 0.05 | 5.00  |
| solar damage telangiectasia                 | 60 | 0.05 | 1.67  |
| warts digitate                              | 60 | 0.05 | 0.00  |
| localized scleroderma                       | 59 | 0.05 | 13.56 |
| pachyonychia congenita                      | 59 | 0.05 | 8.47  |
| atypical mycobacterium                      | 58 | 0.05 | 25.86 |
| pemphigus mucosae                           | 57 | 0.05 | 0.00  |
| tinea ringworm primary lesion               | 57 | 0.05 | 3.51  |
| green nail                                  | 56 | 0.04 | 3.57  |
| hidroa vacciniforme                         | 56 | 0.04 | 12.50 |
| orf                                         | 56 | 0.04 | 42.86 |
| relapsing polychondritis                    | 56 | 0.04 | 7.14  |
| sjogrens syndrome                           | 56 | 0.04 | 17.86 |
| lichen planus penis                         | 55 | 0.04 | 7.27  |
| nail trauma                                 | 55 | 0.04 | 1.82  |
| tinea ringworm incognito                    | 55 | 0.04 | 10.91 |
| angiolymphoid hyperplasia with eosinophilia | 54 | 0.04 | 16.67 |
| atrophy blanche                             | 54 | 0.04 | 7.41  |
| kawasaki syndrome                           | 54 | 0.04 | 12.96 |
| psoriasis vulgaris guttate type             | 54 | 0.04 | 3.70  |
| warts cryotherapy                           | 54 | 0.04 | 3.70  |
| acne fulminans                              | 53 | 0.04 | 5.66  |

|                                     |    |      |       |
|-------------------------------------|----|------|-------|
| <b>dermatoliposclerosis</b>         | 53 | 0.04 | 5.66  |
| <b>tinea incognito</b>              | 53 | 0.04 | 11.32 |
| <b>acne papulopustulosa</b>         | 52 | 0.04 | 7.69  |
| <b>acne scar</b>                    | 52 | 0.04 | 3.85  |
| <b>ecthyma simplex</b>              | 52 | 0.04 | 23.08 |
| <b>eczema chronic</b>               | 52 | 0.04 | 0.00  |
| <b>piedra white</b>                 | 52 | 0.04 | 13.46 |
| <b>trichomycosis</b>                | 52 | 0.04 | 9.62  |
| <b>caterpillar dermatitis</b>       | 51 | 0.04 | 13.73 |
| <b>erythema craquele</b>            | 51 | 0.04 | 5.88  |
| <b>fissure</b>                      | 51 | 0.04 | 0.00  |
| <b>lupus erythematosus systemic</b> | 51 | 0.04 | 9.80  |
| <b>parapsoriasis en plaques</b>     | 51 | 0.04 | 3.92  |
| <b>stomatitis</b>                   | 51 | 0.04 | 9.80  |
| <b>tinea ringworm foot plantar</b>  | 51 | 0.04 | 0.00  |
| <b>tinea ringworm palm</b>          | 51 | 0.04 | 1.96  |
| <b>urticarial vasculitis</b>        | 51 | 0.04 | 3.92  |
| <b>abrasion</b>                     | 50 | 0.04 | 14.00 |
| <b>lichen planus actinicus</b>      | 50 | 0.04 | 34.00 |
| <b>lichen planus of the mucosa</b>  | 50 | 0.04 | 2.00  |
| <b>acne inversa</b>                 | 49 | 0.04 | 14.29 |
| <b>meningococemia</b>               | 49 | 0.04 | 14.29 |
| <b>acne cystica</b>                 | 48 | 0.04 | 12.50 |
| <b>lichen planus follicularis</b>   | 48 | 0.04 | 4.17  |
| <b>maceration</b>                   | 48 | 0.04 | 6.25  |
| <b>cholinergic urticaria</b>        | 47 | 0.04 | 2.13  |
| <b>skin diseases of pregnancy</b>   | 47 | 0.04 | 6.38  |
| <b>acne rosacea</b>                 | 46 | 0.04 | 6.52  |
| <b>granuloma</b>                    | 46 | 0.04 | 4.35  |
| <b>lichen planus linearis</b>       | 46 | 0.04 | 15.22 |
| <b>morphea linear</b>               | 46 | 0.04 | 8.70  |
| <b>nail pigmentation</b>            | 46 | 0.04 | 8.70  |
| <b>wart</b>                         | 46 | 0.04 | 8.70  |

|                                              |    |      |       |
|----------------------------------------------|----|------|-------|
| <b>warts filiformis</b>                      | 46 | 0.04 | 13.04 |
| <b>erosio interdigitalis blastomycetica</b>  | 45 | 0.04 | 0.00  |
| <b>lichen planus of the mucosa erosive</b>   | 45 | 0.04 | 6.67  |
| <b>psoriatic erythroderma</b>                | 45 | 0.04 | 8.89  |
| <b>staphylococcal folliculitis</b>           | 45 | 0.04 | 28.89 |
| <b>cercaria dermatitis</b>                   | 44 | 0.03 | 11.36 |
| <b>eczema arms</b>                           | 44 | 0.03 | 2.27  |
| <b>eczema leg</b>                            | 44 | 0.03 | 2.27  |
| <b>herpes buttocks</b>                       | 44 | 0.03 | 11.36 |
| <b>psoriasis penis</b>                       | 44 | 0.03 | 0.00  |
| <b>rocky mountain spotted fever</b>          | 44 | 0.03 | 11.36 |
| <b>fox fordyce disease</b>                   | 43 | 0.03 | 9.30  |
| <b>reticular erythematous mucinosis</b>      | 43 | 0.03 | 13.95 |
| <b>tylotic dermatitis</b>                    | 43 | 0.03 | 2.33  |
| <b>cicatricial pemphigoid</b>                | 42 | 0.03 | 2.38  |
| <b>nail beading</b>                          | 42 | 0.03 | 9.52  |
| <b>folliculitis cheloidalis</b>              | 41 | 0.03 | 21.95 |
| <b>pseudomonas folliculitis</b>              | 41 | 0.03 | 21.95 |
| <b>degos disease</b>                         | 40 | 0.03 | 25.00 |
| <b>psoriasis vulgaris nail changes</b>       | 40 | 0.03 | 0.00  |
| <b>thrombocytopenic purpura idiopatic</b>    | 40 | 0.03 | 25.00 |
| <b>cutis marmorata</b>                       | 39 | 0.03 | 5.13  |
| <b>lichen planus drug</b>                    | 39 | 0.03 | 2.56  |
| <b>psoriasis arthropathica</b>               | 39 | 0.03 | 0.00  |
| <b>cat scratch disease</b>                   | 38 | 0.03 | 34.21 |
| <b>chronic venous insufficiency grade ii</b> | 38 | 0.03 | 0.00  |
| <b>diabetic bullae</b>                       | 38 | 0.03 | 5.26  |
| <b>eczema face</b>                           | 38 | 0.03 | 2.63  |
| <b>half and half nail</b>                    | 38 | 0.03 | 5.26  |
| <b>infantile atopic dermatitis</b>           | 38 | 0.03 | 7.89  |
| <b>lichen planopilaris</b>                   | 38 | 0.03 | 7.89  |
| <b>nail polish dermatitis</b>                | 38 | 0.03 | 0.00  |
| <b>psoriasis inversus</b>                    | 38 | 0.03 | 18.42 |

|                                              |    |      |       |
|----------------------------------------------|----|------|-------|
| <b>schistosomiasis cutaneous</b>             | 38 | 0.03 | 7.89  |
| <b>trichostasis spinulosa</b>                | 38 | 0.03 | 2.63  |
| <b>urticaria vasculitis</b>                  | 38 | 0.03 | 2.63  |
| <b>gangrene</b>                              | 37 | 0.03 | 10.81 |
| <b>infected eczema</b>                       | 37 | 0.03 | 8.11  |
| <b>lichen planus annular</b>                 | 36 | 0.03 | 13.89 |
| <b>metal dermatitis</b>                      | 36 | 0.03 | 13.89 |
| <b>peripheral occlusive arterial disease</b> | 36 | 0.03 | 0.00  |
| <b>scrophuloderma</b>                        | 36 | 0.03 | 19.44 |
| <b>gingival disease</b>                      | 35 | 0.03 | 11.43 |
| <b>herpes simplex genitalis</b>              | 35 | 0.03 | 20.00 |
| <b>linear scleroderma</b>                    | 35 | 0.03 | 17.14 |
| <b>purpura fulminans</b>                     | 35 | 0.03 | 17.14 |
| <b>ridging beading</b>                       | 35 | 0.03 | 0.00  |
| <b>varicosis</b>                             | 35 | 0.03 | 11.43 |
| <b>acroangiodermatitis</b>                   | 34 | 0.03 | 17.65 |
| <b>herpes simplex virus</b>                  | 34 | 0.03 | 11.76 |
| <b>pomade acne</b>                           | 34 | 0.03 | 5.88  |
| <b>dermatitis swimming</b>                   | 33 | 0.03 | 0.00  |
| <b>herpetic gingivostomatite</b>             | 33 | 0.03 | 12.12 |
| <b>morphoea generalized</b>                  | 33 | 0.03 | 15.15 |
| <b>small pox</b>                             | 33 | 0.03 | 18.18 |
| <b>acne infantile</b>                        | 32 | 0.03 | 9.38  |
| <b>acne neonatorum</b>                       | 32 | 0.03 | 9.38  |
| <b>candidiasis mouth</b>                     | 32 | 0.03 | 3.12  |
| <b>connective tissue disorders</b>           | 32 | 0.03 | 40.62 |
| <b>eczematid</b>                             | 31 | 0.02 | 3.23  |
| <b>painful bruising syndrome</b>             | 31 | 0.02 | 0.00  |
| <b>scrotal tongue</b>                        | 31 | 0.02 | 3.23  |
| <b>dermatitis ekzema</b>                     | 30 | 0.02 | 6.67  |
| <b>erysipeloid</b>                           | 30 | 0.02 | 3.33  |
| <b>ischemia</b>                              | 30 | 0.02 | 6.67  |
| <b>lichen planus hypertrophic</b>            | 29 | 0.02 | 34.48 |



|                                                 |    |      |       |
|-------------------------------------------------|----|------|-------|
| <b>lichen planus vesicular</b>                  | 29 | 0.02 | 20.69 |
| <b>pemphigoid bullous pemphigoid</b>            | 29 | 0.02 | 10.34 |
| <b>thrombangiitis obliterans</b>                | 29 | 0.02 | 0.00  |
| <b>tinea barbae</b>                             | 29 | 0.02 | 6.90  |
| <b>verrucae planae juveniles</b>                | 29 | 0.02 | 13.79 |
| <b>wells syndrome</b>                           | 29 | 0.02 | 27.59 |
| <b>acute eczema</b>                             | 28 | 0.02 | 0.00  |
| <b>cryoglobulinemia</b>                         | 28 | 0.02 | 0.00  |
| <b>lupus erythematosus chronicus verrucosus</b> | 28 | 0.02 | 35.71 |
| <b>nail cosmesis</b>                            | 28 | 0.02 | 7.14  |
| <b>psoriasis anus</b>                           | 28 | 0.02 | 21.43 |
| <b>wound infection</b>                          | 28 | 0.02 | 10.71 |
| <b>dry nails</b>                                | 27 | 0.02 | 11.11 |
| <b>lichen planus exanthematicus</b>             | 27 | 0.02 | 7.41  |
| <b>solar damage cutis rhomboidalis nuchae</b>   | 27 | 0.02 | 11.11 |
| <b>torus palantine</b>                          | 27 | 0.02 | 7.41  |
| <b>warts mouth</b>                              | 27 | 0.02 | 3.70  |
| <b>distal splitting hang nail</b>               | 26 | 0.02 | 0.00  |
| <b>eczema lids</b>                              | 26 | 0.02 | 0.00  |
| <b>granuloma multiforme</b>                     | 26 | 0.02 | 7.69  |
| <b>sycosis barbae</b>                           | 26 | 0.02 | 0.00  |
| <b>decubitus ulcer</b>                          | 25 | 0.02 | 16.00 |
| <b>diabetic gangrene</b>                        | 25 | 0.02 | 12.00 |
| <b>eczema acute</b>                             | 25 | 0.02 | 0.00  |
| <b>eczema trunk generalized</b>                 | 25 | 0.02 | 4.00  |
| <b>nail ridging</b>                             | 25 | 0.02 | 0.00  |
| <b>onychoschizia</b>                            | 25 | 0.02 | 0.00  |
| <b>roseola infantum</b>                         | 25 | 0.02 | 16.00 |
| <b>acanthoma fissuratum</b>                     | 24 | 0.02 | 0.00  |
| <b>eczema areola</b>                            | 24 | 0.02 | 0.00  |
| <b>malassezia folliculitis</b>                  | 24 | 0.02 | 20.83 |
| <b>racquet nail</b>                             | 24 | 0.02 | 4.17  |

|                                                          |    |      |       |
|----------------------------------------------------------|----|------|-------|
| tinea ringworm beard                                     | 24 | 0.02 | 12.50 |
| benign mucosal pemphigoid                                | 23 | 0.02 | 0.00  |
| eosinophilic ulcer of the tongue                         | 23 | 0.02 | 4.35  |
| tinea manuum                                             | 23 | 0.02 | 0.00  |
| erysipelas bullosum                                      | 22 | 0.02 | 0.00  |
| fourniers gangrene                                       | 22 | 0.02 | 4.55  |
| mucous membrane psoriasis                                | 22 | 0.02 | 13.64 |
| streptococci anal penis                                  | 22 | 0.02 | 13.64 |
| warts oral                                               | 22 | 0.02 | 4.55  |
| gloves and socks syndrome                                | 21 | 0.02 | 0.00  |
| heels dry cracked                                        | 21 | 0.02 | 23.81 |
| interstitial granulomatous dermatitis                    | 21 | 0.02 | 4.76  |
| lupus erythematosus tumidus                              | 21 | 0.02 | 0.00  |
| pincer nail syndrome                                     | 21 | 0.02 | 0.00  |
| eczema anal                                              | 20 | 0.02 | 10.00 |
| hecks disease                                            | 20 | 0.02 | 0.00  |
| nodulo cystic acne vulgaris                              | 20 | 0.02 | 5.00  |
| acne necrotica                                           | 19 | 0.02 | 15.79 |
| culicosis bullosa                                        | 19 | 0.02 | 5.26  |
| eczema ears                                              | 19 | 0.02 | 10.53 |
| lichen planus verrucosus                                 | 19 | 0.02 | 5.26  |
| lupus erythematosus chronicus disseminatus superficialis | 19 | 0.02 | 5.26  |
| palmar wart                                              | 19 | 0.02 | 15.79 |
| atopic eczema of the hands                               | 18 | 0.01 | 0.00  |
| disseminated lokalized scleroderma                       | 18 | 0.01 | 0.00  |
| gram negative infection of the foot                      | 18 | 0.01 | 5.56  |
| herpes simplex labialis                                  | 18 | 0.01 | 5.56  |
| localized pemphigoid                                     | 18 | 0.01 | 16.67 |
| nail shedding                                            | 18 | 0.01 | 5.56  |
| pyoderma faciale                                         | 18 | 0.01 | 22.22 |
| rosacea steroid                                          | 18 | 0.01 | 0.00  |
| warts immunocompromised                                  | 18 | 0.01 | 0.00  |

|                                                            |    |      |       |
|------------------------------------------------------------|----|------|-------|
| ant bite                                                   | 17 | 0.01 | 29.41 |
| dermatosis neglecta                                        | 17 | 0.01 | 0.00  |
| glanzmanns thrombasthenia                                  | 17 | 0.01 | 0.00  |
| morphoea nodular                                           | 17 | 0.01 | 0.00  |
| morsicatio buccarum                                        | 17 | 0.01 | 0.00  |
| notalgia paraesthetica                                     | 17 | 0.01 | 0.00  |
| onychodystrophia mediana canaliformis                      | 17 | 0.01 | 0.00  |
| psoriasis light sensitive                                  | 17 | 0.01 | 5.88  |
| psoriasis nail psoriasis                                   | 17 | 0.01 | 11.76 |
| acne comedonica                                            | 16 | 0.01 | 0.00  |
| axillary granular parakeratosis                            | 16 | 0.01 | 0.00  |
| leukoedema oral                                            | 16 | 0.01 | 18.75 |
| parasitoses bites                                          | 16 | 0.01 | 31.25 |
| allergic hand eczema                                       | 15 | 0.01 | 0.00  |
| balanitis bacterial                                        | 15 | 0.01 | 6.67  |
| eczema impetiginized                                       | 15 | 0.01 | 0.00  |
| eczema scrotum                                             | 15 | 0.01 | 6.67  |
| eczema vulva                                               | 15 | 0.01 | 0.00  |
| erythromelalgia                                            | 15 | 0.01 | 6.67  |
| lupus erythematosus subacute cutaneous lupus erythematosus | 15 | 0.01 | 6.67  |
| psoriasis infants                                          | 15 | 0.01 | 6.67  |
| warts plantaris                                            | 15 | 0.01 | 0.00  |
| atopic dermatitis hyperlinear creases                      | 14 | 0.01 | 0.00  |
| lichen planus vaginal                                      | 14 | 0.01 | 7.14  |
| mononucleosis ampicillin syndrome                          | 14 | 0.01 | 0.00  |
| warts plane                                                | 14 | 0.01 | 0.00  |
| cosmetic fragrance allergy                                 | 13 | 0.01 | 7.69  |
| elephantiasis nostras verrucosa                            | 13 | 0.01 | 15.38 |
| lupus miliaris disseminatus faciei                         | 13 | 0.01 | 7.69  |
| morphoea localized                                         | 13 | 0.01 | 0.00  |
| uvl burn                                                   | 13 | 0.01 | 0.00  |
| wound dehiscence                                           | 13 | 0.01 | 7.69  |

|                                                     |    |      |       |
|-----------------------------------------------------|----|------|-------|
| <b>alopecia acquisitum centrifugum</b>              | 12 | 0.01 | 33.33 |
| <b>hematogenous allergic contact dermatitis</b>     | 12 | 0.01 | 8.33  |
| <b>herpes immunocompromised</b>                     | 12 | 0.01 | 8.33  |
| <b>herpes simplex oralis</b>                        | 12 | 0.01 | 8.33  |
| <b>hyperkeratotic fissured hand and foot eczema</b> | 12 | 0.01 | 8.33  |
| <b>lupus erythematosus mucosae oris</b>             | 12 | 0.01 | 0.00  |
| <b>polychondritis</b>                               | 12 | 0.01 | 0.00  |
| <b>pterygium inversum unguis</b>                    | 12 | 0.01 | 0.00  |
| <b>syringolymphoid hyperplasia with alopecia</b>    | 12 | 0.01 | 16.67 |
| <b>lichen planus palm soles</b>                     | 11 | 0.01 | 0.00  |
| <b>pachyonychia congenita hereditaria</b>           | 11 | 0.01 | 9.09  |
| <b>phlebitis superficial</b>                        | 11 | 0.01 | 0.00  |
| <b>psoriasis hiv</b>                                | 11 | 0.01 | 9.09  |
| <b>blue nails minocycline</b>                       | 10 | 0.01 | 10.00 |
| <b>chronic cutaneous graft versus host reaction</b> | 10 | 0.01 | 10.00 |
| <b>folliculitis of barbae</b>                       | 10 | 0.01 | 0.00  |
| <b>lichen planus annularis</b>                      | 10 | 0.01 | 10.00 |
| <b>lymphangitis acute lymphangitis</b>              | 10 | 0.01 | 40.00 |
| <b>onychogryphosis and onychauxis</b>               | 10 | 0.01 | 0.00  |
| <b>primary tufted hairs</b>                         | 10 | 0.01 | 10.00 |
| <b>ulcus cruris mixtum</b>                          | 10 | 0.01 | 10.00 |
| <b>contact dermatitis leg ulcers</b>                | 9  | 0.01 | 44.44 |
| <b>lingua plicata</b>                               | 9  | 0.01 | 0.00  |
| <b>pemphigus foliaceus localized form</b>           | 9  | 0.01 | 11.11 |
| <b>portuguese man of war dermatitis</b>             | 9  | 0.01 | 0.00  |
| <b>psoriasis psoriasis after erysipelas</b>         | 9  | 0.01 | 11.11 |
| <b>shaving folliculitis</b>                         | 9  | 0.01 | 11.11 |
| <b>tinea ringworm border</b>                        | 9  | 0.01 | 0.00  |
| <b>ulcus cruris venosum</b>                         | 9  | 0.01 | 0.00  |
| <b>zoster gangraenosus</b>                          | 9  | 0.01 | 0.00  |
| <b>eczema microbic</b>                              | 8  | 0.01 | 0.00  |

|                                 |                                                     |      |      |       |
|---------------------------------|-----------------------------------------------------|------|------|-------|
|                                 | pemphigus seborrhoicus                              | 8    | 0.01 | 0.00  |
|                                 | pemphigus vegetant                                  | 8    | 0.01 | 50.00 |
|                                 | psoriasis palmoplantaris                            | 8    | 0.01 | 0.00  |
|                                 | tinea barbae profunda                               | 8    | 0.01 | 12.50 |
|                                 | drug lichenoid eruption                             | 7    | 0.01 | 0.00  |
|                                 | primary herpes simplex virus                        | 7    | 0.01 | 28.57 |
|                                 | superficial fungal infections                       | 7    | 0.01 | 0.00  |
|                                 | lipoatrophy postherpetic lipoatrophy                | 6    | 0.00 | 0.00  |
|                                 | psoriasis digits                                    | 6    | 0.00 | 16.67 |
|                                 | tinea capitis profunda                              | 6    | 0.00 | 0.00  |
|                                 | tinea capitis superficialis                         | 6    | 0.00 | 0.00  |
|                                 | urticaria factitia                                  | 6    | 0.00 | 0.00  |
|                                 | autoerythrocyte sensitization                       | 5    | 0.00 | 20.00 |
|                                 | lupus erythematosus systemic lupus erythematosus    | 5    | 0.00 | 0.00  |
|                                 | parasitosis psychogenic                             | 5    | 0.00 | 20.00 |
|                                 | natural rubber latex allergy                        | 4    | 0.00 | 0.00  |
|                                 | tinea ringworm nigra                                | 4    | 0.00 | 0.00  |
|                                 | cow pox                                             | 3    | 0.00 | 0.00  |
|                                 | lichen planus hypertrophicus                        | 3    | 0.00 | 0.00  |
|                                 | cat pox                                             | 1    | 0.00 | 0.00  |
|                                 | <hr/>                                               |      |      |       |
|                                 | systemic carcinomas                                 | 512  | 0.40 | 9.57  |
|                                 | intermediate or malignant vascular tumors           | 372  | 0.29 | 13.44 |
|                                 | dermatofibrosarcoma protuberans                     | 100  | 0.08 | 8.00  |
|                                 | merkel cell carcinoma                               | 66   | 0.05 | 3.03  |
| <b>Malignant dermal tumor</b>   | sarcoma                                             | 45   | 0.04 | 4.44  |
|                                 | abrikossofs tumour of skin                          | 22   | 0.02 | 13.64 |
|                                 | malignant adnexal tumors                            | 21   | 0.02 | 9.52  |
|                                 | soft tissue tumors                                  | 15   | 0.01 | 6.67  |
|                                 | adenocarcinoma in the submandibular salivary glands | 5    | 0.00 | 0.00  |
|                                 | <hr/>                                               |      |      |       |
|                                 | melanocytic nevi                                    | 1464 | 1.16 | 3.96  |
| <b>Pigmented lesions benign</b> | blue nevus                                          | 682  | 0.54 | 4.55  |

|                                      |     |      |       |
|--------------------------------------|-----|------|-------|
| atypical nevi                        | 510 | 0.40 | 8.04  |
| intra-dermal nevus                   | 439 | 0.35 | 8.88  |
| nevus cell nevus                     | 301 | 0.24 | 14.29 |
| congenital nevus                     | 260 | 0.21 | 8.08  |
| halo nevus                           | 230 | 0.18 | 15.65 |
| nevocytic nevus                      | 183 | 0.14 | 3.83  |
| solar lentigo                        | 140 | 0.11 | 2.14  |
| nevus spilus                         | 108 | 0.09 | 6.48  |
| nevus incipiens                      | 105 | 0.08 | 2.86  |
| melanosis neurocutanea               | 78  | 0.06 | 17.95 |
| café au lait spot                    | 71  | 0.06 | 9.86  |
| mongolian spot                       | 67  | 0.05 | 10.45 |
| giant melanocytic nevus              | 62  | 0.05 | 16.13 |
| black heel                           | 61  | 0.05 | 6.56  |
| naevus blue                          | 57  | 0.05 | 14.04 |
| melanoma mimic                       | 52  | 0.04 | 0.00  |
| combined nevus                       | 51  | 0.04 | 0.00  |
| melanonychia striata                 | 51  | 0.04 | 5.88  |
| blue nevus ota                       | 48  | 0.04 | 14.58 |
| mucosal lentigines                   | 47  | 0.04 | 0.00  |
| naevus halo                          | 45  | 0.04 | 17.78 |
| ephelides                            | 37  | 0.03 | 2.70  |
| hereditary dysplastic nevus syndrome | 37  | 0.03 | 18.92 |
| spindle cell nevus                   | 36  | 0.03 | 11.11 |
| melanotic macule                     | 33  | 0.03 | 3.03  |
| naevus achromic                      | 33  | 0.03 | 9.09  |
| spitz nevus                          | 32  | 0.03 | 3.12  |
| lentigo senilis                      | 27  | 0.02 | 0.00  |
| nevus pigmentosus et pilosus         | 27  | 0.02 | 3.70  |
| lentigo simplex                      | 26  | 0.02 | 0.00  |
| nevus repigmented                    | 22  | 0.02 | 9.09  |
| nail nevus                           | 18  | 0.01 | 11.11 |
| ink spot nevus                       | 16  | 0.01 | 0.00  |

|                                    |                                           |        |        |       |
|------------------------------------|-------------------------------------------|--------|--------|-------|
|                                    | <b>naevus of ota bilateral type</b>       | 15     | 0.01   | 0.00  |
|                                    | <b>naevus giant pigmented</b>             | 11     | 0.01   | 0.00  |
|                                    | <b>labial melanotic macule</b>            | 4      | 0.00   | 25.00 |
|                                    | <b>malignant melanoma</b>                 | 1769   | 1.40   | 5.99  |
|                                    | <b>superficial spreading melanoma ssm</b> | 285    | 0.23   | 4.91  |
|                                    | <b>lentigo maligna</b>                    | 199    | 0.16   | 3.02  |
|                                    | <b>lentigo maligna melanoma</b>           | 117    | 0.09   | 1.71  |
|                                    | <b>nail melanoma</b>                      | 60     | 0.05   | 6.67  |
| <b>Pigmented lesions malignant</b> | <b>nodular melanoma nm</b>                | 59     | 0.05   | 1.69  |
|                                    | <b>metastatic melanoma</b>                | 45     | 0.04   | 13.33 |
|                                    | <b>acrolentiginous melanoma alm</b>       | 34     | 0.03   | 2.94  |
|                                    | <b>amelanotic malignant melanoma amm</b>  | 26     | 0.02   | 0.00  |
|                                    | <b>malignant melanoma metastatic</b>      | 22     | 0.02   | 4.55  |
|                                    | <b>mucosal melanoma</b>                   | 12     | 0.01   | 8.33  |
|                                    | <b>melanoma of the parotid</b>            | 11     | 0.01   | 18.18 |
|                                    | <b>Unknown</b>                            | 2454   | 1.94   | 6.40  |
|                                    | <b>All</b>                                | 126477 | 100.00 | 10.38 |

Supplementary Table 3: Frequency Table and False Positive Rates of Diagnoses in the Esteva Dataset

Frequency table of diagnoses and False Positive Rates of evaluated skin lesion images in the Esteva dataset.

All, Number of all evaluated skin lesion images in the Esteva dataset; FPR, False positive rate (%) of the diagnosis in the Esteva dataset; n, Number of occurrences of diagnosis; %, Percentage of diagnosis in relation to all evaluated skin lesion images in the Esteva dataset.

| Category                              | Diagnosis             | n   | %    | FPR   |
|---------------------------------------|-----------------------|-----|------|-------|
|                                       | pilar cyst            | 601 | 0.79 | 14.14 |
|                                       | skin tag              | 600 | 0.79 | 19.17 |
|                                       | hemangioma            | 480 | 0.63 | 15.83 |
|                                       | fibroma               | 453 | 0.60 | 18.76 |
|                                       | pyogenic granuloma    | 291 | 0.38 | 14.43 |
|                                       | dermatofibroma        | 283 | 0.37 | 20.85 |
|                                       | telangiectases        | 254 | 0.34 | 9.45  |
|                                       | sebaceous hyperplasia | 243 | 0.32 | 10.29 |
|                                       | syringoma             | 202 | 0.27 | 8.91  |
|                                       | fordyce spots         | 181 | 0.24 | 12.15 |
|                                       | adenoma sebaceum      | 120 | 0.16 | 13.33 |
|                                       | mucous cyst           | 117 | 0.15 | 17.95 |
| Benign dermal tumors cysts<br>sinuses | angiokeratomas        | 113 | 0.15 | 9.73  |
|                                       | becker nevus          | 112 | 0.15 | 15.18 |
|                                       | trichoepithelioma     | 86  | 0.11 | 11.63 |
|                                       | angioma               | 83  | 0.11 | 12.05 |
|                                       | myxoid cyst           | 78  | 0.10 | 2.56  |
|                                       | pilomatricoma         | 78  | 0.10 | 10.26 |
|                                       | haemangioma           | 76  | 0.10 | 19.74 |
|                                       | venous lake           | 74  | 0.10 | 9.46  |
|                                       | leiomyoma             | 70  | 0.09 | 5.71  |
|                                       | hidrocystoma          | 67  | 0.09 | 8.96  |
|                                       | lymphangioma          | 62  | 0.08 | 20.97 |
|                                       | nevus lipomatosis     | 61  | 0.08 | 27.87 |
|                                       | scrotal cyst          | 60  | 0.08 | 28.33 |



|                                                  |    |      |       |
|--------------------------------------------------|----|------|-------|
| <b>apocrine hydrocystoma</b>                     | 59 | 0.08 | 5.08  |
| <b>steatocystoma multiplex</b>                   | 54 | 0.07 | 18.52 |
| <b>port wine stain</b>                           | 52 | 0.07 | 13.46 |
| <b>eccrine poroma</b>                            | 50 | 0.07 | 10.00 |
| <b>dilated pore of winer</b>                     | 48 | 0.06 | 14.58 |
| <b>trichofolliculoma</b>                         | 48 | 0.06 | 20.83 |
| <b>cherry angioma</b>                            | 47 | 0.06 | 12.77 |
| <b>spider angioma</b>                            | 47 | 0.06 | 17.02 |
| <b>spider nevus</b>                              | 42 | 0.06 | 11.90 |
| <b>cutis marmorata telangiectatica congenita</b> | 41 | 0.05 | 7.32  |
| <b>klippel treunay syndrome</b>                  | 41 | 0.05 | 7.32  |
| <b>chondroma</b>                                 | 40 | 0.05 | 5.00  |
| <b>granulation tissue</b>                        | 40 | 0.05 | 2.50  |
| <b>ganglion</b>                                  | 39 | 0.05 | 20.51 |
| <b>glomus tumor</b>                              | 37 | 0.05 | 8.11  |
| <b>venous malformations</b>                      | 36 | 0.05 | 8.33  |
| <b>dermoid cyst</b>                              | 33 | 0.04 | 9.09  |
| <b>eruptive vellus hair cysts</b>                | 33 | 0.04 | 15.15 |
| <b>infantile digital fibromatosis</b>            | 29 | 0.04 | 10.34 |
| <b>pilonidal sinus</b>                           | 29 | 0.04 | 24.14 |
| <b>strawberry hemangioma</b>                     | 29 | 0.04 | 3.45  |
| <b>acrotrichoma</b>                              | 27 | 0.04 | 25.93 |
| <b>spiradenoma</b>                               | 26 | 0.03 | 7.69  |
| <b>cylindroma</b>                                | 25 | 0.03 | 4.00  |
| <b>collagen nevus</b>                            | 23 | 0.03 | 26.09 |
| <b>nevus anemicus</b>                            | 23 | 0.03 | 4.35  |
| <b>dental sinus</b>                              | 22 | 0.03 | 18.18 |
| <b>ectopic respiratory epithelia</b>             | 22 | 0.03 | 0.00  |
| <b>connective tissue nevus</b>                   | 20 | 0.03 | 5.00  |
| <b>neurolemmoma</b>                              | 20 | 0.03 | 10.00 |
| <b>myxoma</b>                                    | 19 | 0.03 | 5.26  |
| <b>endometriosis</b>                             | 18 | 0.02 | 33.33 |

|                                                             |                                                |     |      |       |
|-------------------------------------------------------------|------------------------------------------------|-----|------|-------|
|                                                             | <b>epithelioma adenoides cysticum</b>          | 18  | 0.02 | 11.11 |
|                                                             | <b>fibrolipoma</b>                             | 17  | 0.02 | 0.00  |
|                                                             | <b>lymphatic malformations</b>                 | 16  | 0.02 | 6.25  |
|                                                             | <b>nevus flammeus</b>                          | 16  | 0.02 | 25.00 |
|                                                             | <b>aponeurotic fibroma</b>                     | 15  | 0.02 | 6.67  |
|                                                             | <b>cirroid aneurysm</b>                        | 14  | 0.02 | 7.14  |
|                                                             | <b>vascular anomaly</b>                        | 14  | 0.02 | 28.57 |
|                                                             | <b>myofibromatosis</b>                         | 13  | 0.02 | 23.08 |
|                                                             | <b>arteriovenous malformation</b>              | 12  | 0.02 | 16.67 |
|                                                             | <b>periungual fibroma</b>                      | 12  | 0.02 | 25.00 |
|                                                             | <b>tenosynovitis nodular</b>                   | 12  | 0.02 | 0.00  |
|                                                             | <b>cyst synovial</b>                           | 11  | 0.01 | 9.09  |
|                                                             | <b>granuloma pyogenic</b>                      | 11  | 0.01 | 0.00  |
|                                                             | <b>hemangioma infancy</b>                      | 10  | 0.01 | 10.00 |
|                                                             | <b>hemangioma racemosum</b>                    | 10  | 0.01 | 0.00  |
|                                                             | <b>trichoblastoma</b>                          | 10  | 0.01 | 10.00 |
|                                                             | <b>angioma serpiginosum</b>                    | 9   | 0.01 | 22.22 |
|                                                             | <b>perifollicular fibroma</b>                  | 8   | 0.01 | 0.00  |
|                                                             | <b>trichoadenoma</b>                           | 8   | 0.01 | 12.50 |
|                                                             | <b>trichoepithelioma papulosum multiplex</b>   | 8   | 0.01 | 0.00  |
| <b>Cutaneous lymphoma and lymphoid infiltrates</b>          | <b>cutaneous t cell lymphoma</b>               | 360 | 0.48 | 11.67 |
|                                                             | <b>lymphoma b cell</b>                         | 112 | 0.15 | 6.25  |
|                                                             | <b>lymphomatoid papulosis</b>                  | 110 | 0.15 | 9.09  |
|                                                             | <b>pseudo lymphoma other types</b>             | 15  | 0.02 | 0.00  |
|                                                             | <b>erythema arciforme et palpabile migrans</b> | 4   | 0.01 | 0.00  |
|                                                             | <b>lymphomas lymphocytic infiltrations</b>     | 2   | 0.00 | 0.00  |
| <b>Epidermal tumors hamartomas milia and growths benign</b> | <b>seborrheic keratosis</b>                    | 876 | 1.16 | 4.34  |
|                                                             | <b>benign keratosis</b>                        | 414 | 0.55 | 7.00  |
|                                                             | <b>epidermal nevus</b>                         | 388 | 0.51 | 11.08 |
|                                                             | <b>seborrheic keratoses ruff</b>               | 331 | 0.44 | 0.60  |
|                                                             | <b>milia</b>                                   | 276 | 0.36 | 18.48 |
|                                                             | <b>porokeratosis</b>                           | 176 | 0.23 | 5.68  |
|                                                             | <b>prurigo nodularis</b>                       | 86  | 0.11 | 34.88 |

|                                                     |                                              |     |      |       |
|-----------------------------------------------------|----------------------------------------------|-----|------|-------|
|                                                     | <b>dermatosis papulosa nigra</b>             | 75  | 0.10 | 10.67 |
|                                                     | <b>callus</b>                                | 72  | 0.10 | 5.56  |
|                                                     | <b>acquired digital fibrokeratoma</b>        | 50  | 0.07 | 12.00 |
|                                                     | <b>corns</b>                                 | 40  | 0.05 | 10.00 |
|                                                     | <b>seborrheic keratosis irritated</b>        | 40  | 0.05 | 0.00  |
|                                                     | <b>seborrheic keratoses smooth</b>           | 34  | 0.04 | 0.00  |
|                                                     | <b>giant comedo</b>                          | 30  | 0.04 | 6.67  |
|                                                     | <b>acral keratosis</b>                       | 27  | 0.04 | 11.11 |
|                                                     | <b>keratosis seborrheic</b>                  | 26  | 0.03 | 7.69  |
|                                                     | <b>stucco keratosis</b>                      | 23  | 0.03 | 8.70  |
|                                                     | <b>stucco keratoses</b>                      | 19  | 0.03 | 5.26  |
|                                                     | <b>leser trelat sign</b>                     | 17  | 0.02 | 0.00  |
|                                                     | <b>clear cell acanthoma</b>                  | 16  | 0.02 | 6.25  |
|                                                     | <b>warty dyskeratoma</b>                     | 11  | 0.01 | 0.00  |
|                                                     | <b>solar damage actinic keratosis</b>        | 951 | 1.26 | 4.21  |
|                                                     | <b>basal cell carcinoma</b>                  | 900 | 1.19 | 8.22  |
|                                                     | <b>squamous cell carcinoma</b>               | 657 | 0.87 | 14.31 |
|                                                     | <b>bowens disease</b>                        | 416 | 0.55 | 7.21  |
|                                                     | <b>keratoacanthoma</b>                       | 413 | 0.55 | 13.56 |
|                                                     | <b>cutaneous horn</b>                        | 160 | 0.21 | 8.75  |
|                                                     | <b>actinic keratosis</b>                     | 108 | 0.14 | 8.33  |
|                                                     | <b>pagets disease</b>                        | 102 | 0.13 | 11.76 |
|                                                     | <b>leukoplakia</b>                           | 101 | 0.13 | 6.93  |
| <b>Epidermal tumors pre malignant and malignant</b> | <b>solar damage</b>                          | 62  | 0.08 | 3.23  |
|                                                     | <b>actinic cheilitis</b>                     | 60  | 0.08 | 1.67  |
|                                                     | <b>arsenical keratoses</b>                   | 54  | 0.07 | 11.11 |
|                                                     | <b>basal cell nevus syndrome</b>             | 48  | 0.06 | 12.50 |
|                                                     | <b>erythroplasia queyrat</b>                 | 48  | 0.06 | 18.75 |
|                                                     | <b>extramammary paget disease</b>            | 46  | 0.06 | 10.87 |
|                                                     | <b>pigmented basal cell carcinoma</b>        | 39  | 0.05 | 7.69  |
|                                                     | <b>solid cystic basal cell carcinoma</b>     | 38  | 0.05 | 21.05 |
|                                                     | <b>solar damage actinex treatment</b>        | 36  | 0.05 | 2.78  |
|                                                     | <b>nevroid basal cell carcinoma syndrome</b> | 35  | 0.05 | 11.43 |

|                                         |    |      |        |
|-----------------------------------------|----|------|--------|
| <b>superficial basal cell carcinoma</b> | 26 | 0.03 | 0.00   |
| <b>solar damage actinic cheilitis</b>   | 20 | 0.03 | 5.00   |
| <b>basal cell carcinoma ulcerating</b>  | 18 | 0.02 | 0.00   |
| <b>actinic keratosis face</b>           | 16 | 0.02 | 6.25   |
| <b>hypertrophic actinic keratosis</b>   | 16 | 0.02 | 0.00   |
| <b>verrucous carcinoma</b>              | 16 | 0.02 | 6.25   |
| <b>actinic keratosis lesion</b>         | 14 | 0.02 | 14.29  |
| <b>leucoplakia praecancerosa</b>        | 14 | 0.02 | 0.00   |
| <b>ulcus terebrans</b>                  | 14 | 0.02 | 7.14   |
| <b>basal cell carcinoma ear</b>         | 13 | 0.02 | 0.00   |
| <b>carcinoma of lip</b>                 | 13 | 0.02 | 15.38  |
| <b>actinic keratosis ear</b>            | 12 | 0.02 | 0.00   |
| <b>basal cell carcinoma lid</b>         | 11 | 0.01 | 18.18  |
| <b>basal cell carcinoma scalp</b>       | 11 | 0.01 | 18.18  |
| <b>actinic keratosis hand</b>           | 10 | 0.01 | 0.00   |
| <b>basal cell carcinoma nose</b>        | 10 | 0.01 | 0.00   |
| <b>solar damage fu treatment</b>        | 10 | 0.01 | 0.00   |
| <b>squamous cell carcinoma nose</b>     | 9  | 0.01 | 0.00   |
| <b>basal cell carcinoma morpheiform</b> | 7  | 0.01 | 0.00   |
| <b>basal cell carcinoma face</b>        | 6  | 0.01 | 16.67  |
| <b>basal cell carcinoma lesion</b>      | 6  | 0.01 | 16.67  |
| <b>squamous cell carcinoma ear</b>      | 6  | 0.01 | 0.00   |
| <b>squamous cell carcinoma lesion</b>   | 5  | 0.01 | 20.00  |
| <b>keratosis solar</b>                  | 4  | 0.01 | 0.00   |
| <b>squamous cell carcinoma lip</b>      | 4  | 0.01 | 25.00  |
| <b>actinic keratosis nose</b>           | 3  | 0.00 | 0.00   |
| <b>basal cell carcinoma aldera</b>      | 3  | 0.00 | 66.67  |
| <b>squamous cell carcinoma face</b>     | 3  | 0.00 | 0.00   |
| <b>actinic keratosis pigmented</b>      | 2  | 0.00 | 0.00   |
| <b>basal cell carcinoma superficial</b> | 2  | 0.00 | 0.00   |
| <b>actinic keratosis horn</b>           | 1  | 0.00 | 100.00 |
| <b>basal cell carcinoma lip</b>         | 1  | 0.00 | 0.00   |

---

---

|                                                 |                                                 |     |      |       |
|-------------------------------------------------|-------------------------------------------------|-----|------|-------|
|                                                 | <b>ichthyosis</b>                               | 505 | 0.67 | 26.14 |
|                                                 | <b>epidermolysis bullosa</b>                    | 435 | 0.57 | 20.92 |
|                                                 | <b>neurofibromatosis</b>                        | 342 | 0.45 | 16.67 |
|                                                 | <b>darriers disease</b>                         | 247 | 0.33 | 8.50  |
|                                                 | <b>ichthyosis vulgaris</b>                      | 122 | 0.16 | 8.20  |
|                                                 | <b>tuberous sclerosis</b>                       | 122 | 0.16 | 27.87 |
|                                                 | <b>rendu osler syndrome</b>                     | 113 | 0.15 | 15.93 |
|                                                 | <b>incontinentia pigmenti</b>                   | 85  | 0.11 | 29.41 |
|                                                 | <b>epidermolytic hyperkeratosis</b>             | 74  | 0.10 | 5.41  |
|                                                 | <b>hailey hailey disease</b>                    | 73  | 0.10 | 12.33 |
|                                                 | <b>pseudoxanthoma elasticum</b>                 | 71  | 0.09 | 11.27 |
|                                                 | <b>erythrokeratoderma progressive symmetric</b> | 63  | 0.08 | 14.29 |
|                                                 | <b>collodion baby</b>                           | 61  | 0.08 | 26.23 |
|                                                 | <b>ehlers danlos syndrome</b>                   | 58  | 0.08 | 27.59 |
|                                                 | <b>supernumerary growths</b>                    | 58  | 0.08 | 29.31 |
| <b>Genodermatoses and supernumerary growths</b> | <b>vascular tumors and malformations</b>        | 57  | 0.08 | 10.53 |
|                                                 | <b>ichthyosis congenita</b>                     | 43  | 0.06 | 2.33  |
|                                                 | <b>x linked ichthyosis</b>                      | 41  | 0.05 | 19.51 |
|                                                 | <b>leopard syndrome</b>                         | 39  | 0.05 | 17.95 |
|                                                 | <b>acrokeratoelastoidosis</b>                   | 36  | 0.05 | 5.56  |
|                                                 | <b>erythrokeratoderma variabilis</b>            | 34  | 0.04 | 26.47 |
|                                                 | <b>muir torre syndrome</b>                      | 29  | 0.04 | 10.34 |
|                                                 | <b>peutz jeghers syndrome</b>                   | 29  | 0.04 | 10.34 |
|                                                 | <b>lipoid proteinosis urbach wiethe disease</b> | 27  | 0.04 | 14.81 |
|                                                 | <b>congenital ichthyosiform erythroderma</b>    | 26  | 0.03 | 3.85  |
|                                                 | <b>rothmund thomson syndrome</b>                | 26  | 0.03 | 11.54 |
|                                                 | <b>xeroderma pigmentosum</b>                    | 25  | 0.03 | 32.00 |
|                                                 | <b>albinism</b>                                 | 24  | 0.03 | 12.50 |
|                                                 | <b>buschke ollendorf syndrome</b>               | 22  | 0.03 | 13.64 |
|                                                 | <b>acrokeratosis verruciformis</b>              | 21  | 0.03 | 0.00  |
|                                                 | <b>congenital erythropoietic porphyria</b>      | 21  | 0.03 | 14.29 |
|                                                 | <b>congenital dyskeratosis</b>                  | 20  | 0.03 | 20.00 |

|                     |                                               |      |      |       |
|---------------------|-----------------------------------------------|------|------|-------|
|                     | <b>acrodermatitis enteropathica</b>           | 19   | 0.03 | 52.63 |
|                     | <b>ichthyosis sex linked</b>                  | 16   | 0.02 | 0.00  |
|                     | <b>sjgren larsson syndrome</b>                | 16   | 0.02 | 6.25  |
|                     | <b>cowden disease</b>                         | 15   | 0.02 | 13.33 |
|                     | <b>congenital anomalies</b>                   | 13   | 0.02 | 0.00  |
|                     | <b>lamellar ichthyosis</b>                    | 13   | 0.02 | 30.77 |
|                     | <b>birt hogg dube</b>                         | 11   | 0.01 | 9.09  |
|                     | <b>dyschromatosis universalis</b>             | 11   | 0.01 | 45.45 |
|                     | <b>ichthyosis hystrix</b>                     | 11   | 0.01 | 9.09  |
|                     | <b>laugier hunziker s syndrome</b>            | 11   | 0.01 | 9.09  |
|                     | <b>gargoylism</b>                             | 9    | 0.01 | 33.33 |
|                     | <b>harlequin ichthyosis</b>                   | 6    | 0.01 | 16.67 |
|                     | <b>leprechaunism syndrome</b>                 | 6    | 0.01 | 0.00  |
|                     | <b>erythrodermia exfoliativa leiner</b>       | 4    | 0.01 | 0.00  |
|                     | <b>phakomatosis pigmentovascularis</b>        | 4    | 0.01 | 0.00  |
|                     | <b>ichthyosis dominant</b>                    | 3    | 0.00 | 0.00  |
|                     | <b>ichthyosis other forms</b>                 | 1    | 0.00 | 0.00  |
|                     | <b>knuckle pads</b>                           | 1    | 0.00 | 0.00  |
|                     | <hr/>                                         |      |      |       |
|                     | <b>acne vulgaris</b>                          | 1671 | 2.21 | 19.21 |
|                     | <b>leprosy</b>                                | 921  | 1.22 | 19.87 |
|                     | <b>eczema</b>                                 | 836  | 1.10 | 19.26 |
|                     | <b>rosacea</b>                                | 821  | 1.08 | 8.65  |
|                     | <b>herpes zoster</b>                          | 799  | 1.06 | 11.89 |
|                     | <b>syphilis</b>                               | 743  | 0.98 | 17.63 |
|                     | <b>lichen</b>                                 | 734  | 0.97 | 12.53 |
| <b>Inflammatory</b> | <b>alopecia</b>                               | 685  | 0.90 | 23.65 |
|                     | <b>psoriasis</b>                              | 683  | 0.90 | 9.37  |
|                     | <b>sunburn</b>                                | 678  | 0.90 | 28.47 |
|                     | <b>tinea corporis</b>                         | 676  | 0.89 | 9.02  |
|                     | <b>onychomycosis</b>                          | 652  | 0.86 | 2.45  |
|                     | <b>hair disorderstrichorrhexis nodosa etc</b> | 640  | 0.85 | 10.47 |
|                     | <b>impetigo</b>                               | 590  | 0.78 | 15.76 |
|                     | <b>fungal infections dermal and subcut</b>    | 585  | 0.77 | 15.21 |

|                                                                                 |     |      |       |
|---------------------------------------------------------------------------------|-----|------|-------|
| <b>pigmentation diseases</b>                                                    | 578 | 0.76 | 19.20 |
| <b>vasculitis</b>                                                               | 572 | 0.76 | 11.01 |
| <b>scarring alopecia</b>                                                        | 558 | 0.74 | 9.86  |
| <b>lichen planus</b>                                                            | 551 | 0.73 | 6.72  |
| <b>seborrheic dermatitis</b>                                                    | 536 | 0.71 | 10.26 |
| <b>atrophic skin disease striae and elastic fiber disorders</b>                 | 535 | 0.71 | 19.07 |
| <b>tick bite</b>                                                                | 528 | 0.70 | 28.60 |
| <b>candidiasis</b>                                                              | 522 | 0.69 | 7.66  |
| <b>tinea pedis</b>                                                              | 486 | 0.64 | 4.53  |
| <b>scabies</b>                                                                  | 472 | 0.62 | 13.77 |
| <b>urticaria</b>                                                                | 466 | 0.62 | 12.66 |
| <b>non scarring alopecia</b>                                                    | 460 | 0.61 | 11.52 |
| <b>stasis ulcer</b>                                                             | 447 | 0.59 | 2.91  |
| <b>scarring</b>                                                                 | 439 | 0.58 | 11.16 |
| <b>depositional diseases calcinosis cutis amyloid mucinosis gout and others</b> | 422 | 0.56 | 12.80 |
| <b>molluscum contagiosum</b>                                                    | 414 | 0.55 | 27.54 |
| <b>lupus acute</b>                                                              | 410 | 0.54 | 22.20 |
| <b>drug eruption</b>                                                            | 395 | 0.52 | 11.39 |
| <b>allergic contact dermatitis</b>                                              | 394 | 0.52 | 9.64  |
| <b>pustular skin disease non infectious</b>                                     | 393 | 0.52 | 6.36  |
| <b>folliculitis</b>                                                             | 382 | 0.50 | 23.04 |
| <b>factitial dermatitis</b>                                                     | 377 | 0.50 | 13.00 |
| <b>metabolic and nutritional diseases</b>                                       | 363 | 0.48 | 23.69 |
| <b>atopic dermatitis feet</b>                                                   | 339 | 0.45 | 5.01  |
| <b>erythema multiforme and fixed drug eruptions</b>                             | 336 | 0.44 | 16.96 |
| <b>xanthomas</b>                                                                | 320 | 0.42 | 16.25 |
| <b>photodermatoses</b>                                                          | 313 | 0.41 | 11.18 |
| <b>scleroderma</b>                                                              | 300 | 0.40 | 19.33 |
| <b>herpes simplex</b>                                                           | 293 | 0.39 | 13.65 |
| <b>bullous pemphigoid</b>                                                       | 289 | 0.38 | 14.53 |
| <b>perioral dermatitis</b>                                                      | 280 | 0.37 | 4.29  |

|                                                            |     |      |       |
|------------------------------------------------------------|-----|------|-------|
| <b>condyloma acuminata</b>                                 | 265 | 0.35 | 16.98 |
| <b>sarcoidosis</b>                                         | 264 | 0.35 | 11.74 |
| <b>tinea versicolor</b>                                    | 263 | 0.35 | 10.65 |
| <b>keratosis pilaris and related follicular disorders</b>  | 261 | 0.34 | 6.90  |
| <b>rhinophyma</b>                                          | 261 | 0.34 | 10.34 |
| <b>dermatomyositis</b>                                     | 253 | 0.33 | 8.70  |
| <b>histiocytic disorders and proliferations</b>            | 253 | 0.33 | 18.18 |
| <b>dry skin eczema</b>                                     | 249 | 0.33 | 4.82  |
| <b>shoe allergy</b>                                        | 247 | 0.33 | 25.91 |
| <b>solar elastosis</b>                                     | 247 | 0.33 | 10.53 |
| <b>erysipelas</b>                                          | 246 | 0.32 | 9.35  |
| <b>tinea capitis</b>                                       | 242 | 0.32 | 6.20  |
| <b>granuloma annulare</b>                                  | 238 | 0.31 | 7.14  |
| <b>gyrate erythemas</b>                                    | 234 | 0.31 | 11.11 |
| <b>mastocytosis</b>                                        | 234 | 0.31 | 7.69  |
| <b>panniculitis lipodystrophy and diseases of subcutis</b> | 234 | 0.31 | 12.82 |
| <b>dermatitis herpetiformis</b>                            | 231 | 0.31 | 15.15 |
| <b>pemphigus</b>                                           | 231 | 0.31 | 12.55 |
| <b>pityriasis rosea</b>                                    | 229 | 0.30 | 9.17  |
| <b>dyshidrotic eczema</b>                                  | 222 | 0.29 | 3.15  |
| <b>stasis dermatitis</b>                                   | 221 | 0.29 | 2.26  |
| <b>pityriasis versicolor</b>                               | 218 | 0.29 | 10.55 |
| <b>cutaneous manifestations of systemic disease</b>        | 214 | 0.28 | 18.22 |
| <b>pemphigus vulgaris</b>                                  | 213 | 0.28 | 5.63  |
| <b>tinea cruris</b>                                        | 212 | 0.28 | 25.47 |
| <b>atopic dermatitis adult phase</b>                       | 209 | 0.28 | 1.91  |
| <b>varicella</b>                                           | 209 | 0.28 | 40.19 |
| <b>lichen simplex</b>                                      | 205 | 0.27 | 8.29  |
| <b>lichen sclerosus skin</b>                               | 195 | 0.26 | 14.36 |
| <b>erythroderma</b>                                        | 194 | 0.26 | 7.73  |
| <b>malformations of extremities</b>                        | 190 | 0.25 | 10.53 |



|                                                       |     |      |       |
|-------------------------------------------------------|-----|------|-------|
| <b>tuberculosis</b>                                   | 190 | 0.25 | 10.53 |
| <b>solar damage atrophy</b>                           | 187 | 0.25 | 17.11 |
| <b>pityrosporum folliculitis</b>                      | 185 | 0.24 | 12.97 |
| <b>misuse dermatitis</b>                              | 184 | 0.24 | 7.61  |
| <b>reiters disease</b>                                | 182 | 0.24 | 7.14  |
| <b>psoriasis chronic plaque</b>                       | 178 | 0.24 | 3.37  |
| <b>eczema hand</b>                                    | 176 | 0.23 | 1.70  |
| <b>pediculosis lids</b>                               | 172 | 0.23 | 16.86 |
| <b>solar purpura</b>                                  | 172 | 0.23 | 5.23  |
| <b>hand foot mouth</b>                                | 164 | 0.22 | 17.07 |
| <b>cheilitis</b>                                      | 161 | 0.21 | 8.70  |
| <b>lupus subacute</b>                                 | 161 | 0.21 | 13.66 |
| <b>eczema herpeticum</b>                              | 153 | 0.20 | 8.50  |
| <b>toxic epidermal necrolysis and stevens johnson</b> | 150 | 0.20 | 6.67  |
| <b>pernio and mimics</b>                              | 148 | 0.20 | 10.14 |
| <b>diseases of the ear</b>                            | 144 | 0.19 | 11.11 |
| <b>insect bite</b>                                    | 143 | 0.19 | 16.78 |
| <b>morphea</b>                                        | 143 | 0.19 | 13.99 |
| <b>nematode infection</b>                             | 143 | 0.19 | 13.99 |
| <b>warts vulgaris</b>                                 | 141 | 0.19 | 9.93  |
| <b>planar warts</b>                                   | 138 | 0.18 | 7.97  |
| <b>stasis edema</b>                                   | 138 | 0.18 | 5.07  |
| <b>pigmented purpuric dermatosis</b>                  | 135 | 0.18 | 6.67  |
| <b>virus exanthem</b>                                 | 134 | 0.18 | 6.72  |
| <b>onycholysis</b>                                    | 133 | 0.18 | 3.76  |
| <b>pitted keratolysis</b>                             | 133 | 0.18 | 6.02  |
| <b>leukocytoclastic vasculitis</b>                    | 131 | 0.17 | 8.40  |
| <b>acanthosis nigricans and carp</b>                  | 130 | 0.17 | 13.08 |
| <b>perforating disorders</b>                          | 130 | 0.17 | 9.23  |
| <b>tinea manus</b>                                    | 130 | 0.17 | 1.54  |
| <b>diaper dermatitis</b>                              | 129 | 0.17 | 13.95 |
| <b>furuncle</b>                                       | 129 | 0.17 | 22.48 |

|                                          |     |      |       |
|------------------------------------------|-----|------|-------|
| <b>hidradenitis</b>                      | 129 | 0.17 | 36.43 |
| <b>tattoo and foreign body reactions</b> | 129 | 0.17 | 10.85 |
| <b>cellulitis</b>                        | 127 | 0.17 | 9.45  |
| <b>ashy dermatosis</b>                   | 126 | 0.17 | 15.08 |
| <b>nail psoriasis</b>                    | 124 | 0.16 | 3.23  |
| <b>sun damaged skin</b>                  | 123 | 0.16 | 20.33 |
| <b>atopic dermatitis</b>                 | 120 | 0.16 | 15.00 |
| <b>gianotti crosti</b>                   | 120 | 0.16 | 14.17 |
| <b>verruca vulgaris</b>                  | 119 | 0.16 | 13.45 |
| <b>eczema nummular</b>                   | 116 | 0.15 | 4.31  |
| <b>necrobiosis lipoidica</b>             | 115 | 0.15 | 8.70  |
| <b>acne keloidalis</b>                   | 113 | 0.15 | 15.93 |
| <b>balanitis</b>                         | 113 | 0.15 | 7.96  |
| <b>livedo reticularis</b>                | 112 | 0.15 | 6.25  |
| <b>biting fleas</b>                      | 111 | 0.15 | 8.11  |
| <b>solar damage favre racouchot</b>      | 107 | 0.14 | 8.41  |
| <b>nail diseases</b>                     | 104 | 0.14 | 6.73  |
| <b>clubbing</b>                          | 103 | 0.14 | 3.88  |
| <b>genital warts</b>                     | 103 | 0.14 | 26.21 |
| <b>id reaction</b>                       | 103 | 0.14 | 6.80  |
| <b>porphyria</b>                         | 103 | 0.14 | 10.68 |
| <b>scarlet fever</b>                     | 103 | 0.14 | 3.88  |
| <b>tinea faciale</b>                     | 103 | 0.14 | 13.59 |
| <b>tinea nigra</b>                       | 102 | 0.13 | 4.90  |
| <b>pemphigus foliaceus</b>               | 101 | 0.13 | 6.93  |
| <b>herpes simplex analis</b>             | 100 | 0.13 | 6.00  |
| <b>inverse psoriasis</b>                 | 99  | 0.13 | 13.13 |
| <b>tinea faciei</b>                      | 98  | 0.13 | 12.24 |
| <b>contact dermatitis</b>                | 97  | 0.13 | 10.31 |
| <b>lupus vulgaris</b>                    | 97  | 0.13 | 8.25  |
| <b>pityriasis lichenoides and pleva</b>  | 97  | 0.13 | 14.43 |
| <b>chronic recurrent aphthae</b>         | 96  | 0.13 | 13.54 |
| <b>hypereosinophilic syndrome</b>        | 95  | 0.13 | 4.21  |

|                                               |    |      |       |
|-----------------------------------------------|----|------|-------|
| <b>intertrigo</b>                             | 95 | 0.13 | 4.21  |
| <b>beaus lines</b>                            | 94 | 0.12 | 7.45  |
| <b>staphylococcal scalded skin syndrome</b>   | 93 | 0.12 | 16.13 |
| <b>radiodermatitis</b>                        | 92 | 0.12 | 6.52  |
| <b>subacute cutaneous lupus erythematosus</b> | 92 | 0.12 | 14.13 |
| <b>ingrown nail</b>                           | 91 | 0.12 | 6.59  |
| <b>discoïd lupus erythematosus</b>            | 90 | 0.12 | 28.89 |
| <b>neurodermatitis</b>                        | 90 | 0.12 | 12.22 |
| <b>henoch schonlein purpura</b>               | 89 | 0.12 | 6.74  |
| <b>thermal burn</b>                           | 89 | 0.12 | 5.62  |
| <b>herpes gestationis</b>                     | 88 | 0.12 | 13.64 |
| <b>paronychia</b>                             | 87 | 0.11 | 4.60  |
| <b>pityriasis rubra pilaris</b>               | 87 | 0.11 | 9.20  |
| <b>diabetic ulcer</b>                         | 86 | 0.11 | 10.47 |
| <b>geographic tongue</b>                      | 86 | 0.11 | 4.65  |
| <b>lymphedema</b>                             | 85 | 0.11 | 11.76 |
| <b>neurotrophic ulcer</b>                     | 85 | 0.11 | 11.76 |
| <b>tinea ringworm versicolor</b>              | 85 | 0.11 | 4.71  |
| <b>warts</b>                                  | 85 | 0.11 | 10.59 |
| <b>papulose bowenoïde</b>                     | 84 | 0.11 | 20.24 |
| <b>pemphigus foliaceus</b>                    | 84 | 0.11 | 1.19  |
| <b>tinea ringworm body</b>                    | 82 | 0.11 | 4.88  |
| <b>erythema ab igne</b>                       | 81 | 0.11 | 11.11 |
| <b>median nail dystrophy</b>                  | 81 | 0.11 | 6.17  |
| <b>raynauds disease</b>                       | 81 | 0.11 | 7.41  |
| <b>steroid acne</b>                           | 81 | 0.11 | 16.05 |
| <b>nummular eczema</b>                        | 80 | 0.11 | 5.00  |
| <b>chronic bullous disease of childhood</b>   | 78 | 0.10 | 21.79 |
| <b>epidermodysplasia verruciformis</b>        | 77 | 0.10 | 10.39 |
| <b>miliaria</b>                               | 76 | 0.10 | 6.58  |
| <b>angioedema</b>                             | 75 | 0.10 | 13.33 |
| <b>diseases of the eye</b>                    | 74 | 0.10 | 2.70  |

|                                          |    |      |       |
|------------------------------------------|----|------|-------|
| <b>nail dystrophy</b>                    | 72 | 0.10 | 8.33  |
| <b>pincer nails</b>                      | 72 | 0.10 | 13.89 |
| <b>herpetic sycosis</b>                  | 71 | 0.09 | 21.13 |
| <b>poikiloderma civatte</b>              | 70 | 0.09 | 1.43  |
| <b>purpura</b>                           | 70 | 0.09 | 8.57  |
| <b>measles</b>                           | 69 | 0.09 | 5.80  |
| <b>psoriasis palms soles</b>             | 69 | 0.09 | 1.45  |
| <b>hairy tongue</b>                      | 67 | 0.09 | 13.43 |
| <b>scalp psoriasis</b>                   | 66 | 0.09 | 3.03  |
| <b>tinea faciei</b>                      | 65 | 0.09 | 7.69  |
| <b>grovers disease</b>                   | 64 | 0.08 | 3.12  |
| <b>leukonychia</b>                       | 64 | 0.08 | 4.69  |
| <b>pemphigus vegetans</b>                | 64 | 0.08 | 6.25  |
| <b>acne conglobata</b>                   | 63 | 0.08 | 11.11 |
| <b>acne excoriee</b>                     | 63 | 0.08 | 12.70 |
| <b>desquamation</b>                      | 63 | 0.08 | 3.17  |
| <b>erythrasma</b>                        | 63 | 0.08 | 15.87 |
| <b>guttate psoriasis</b>                 | 62 | 0.08 | 12.90 |
| <b>chancroid</b>                         | 61 | 0.08 | 19.67 |
| <b>fibromatosis</b>                      | 61 | 0.08 | 13.11 |
| <b>pigmented bands</b>                   | 61 | 0.08 | 11.48 |
| <b>lichen striatus</b>                   | 60 | 0.08 | 10.00 |
| <b>solar damage telangiectasia</b>       | 60 | 0.08 | 1.67  |
| <b>gonorrhoea</b>                        | 59 | 0.08 | 20.34 |
| <b>lichen nitidus</b>                    | 58 | 0.08 | 8.62  |
| <b>splinter hemorrhage</b>               | 58 | 0.08 | 10.34 |
| <b>ulcer</b>                             | 57 | 0.08 | 3.51  |
| <b>candidiasis chronic mucocutaneous</b> | 56 | 0.07 | 8.93  |
| <b>spider bite</b>                       | 54 | 0.07 | 35.19 |
| <b>behcets disease</b>                   | 53 | 0.07 | 18.87 |
| <b>sjogrens syndrome</b>                 | 53 | 0.07 | 18.87 |
| <b>terry nails</b>                       | 53 | 0.07 | 5.66  |
| <b>green nail</b>                        | 52 | 0.07 | 3.85  |

|                                                              |    |      |       |
|--------------------------------------------------------------|----|------|-------|
| <b>piedra white</b>                                          | 52 | 0.07 | 13.46 |
| <b>rheumatoid nodule</b>                                     | 52 | 0.07 | 19.23 |
| <b>stasis dermatitis and ulcers</b>                          | 52 | 0.07 | 0.00  |
| <b>crest syndrome</b>                                        | 51 | 0.07 | 9.80  |
| <b>dermographia</b>                                          | 51 | 0.07 | 7.84  |
| <b>orf</b>                                                   | 51 | 0.07 | 43.14 |
| <b>abrasion</b>                                              | 50 | 0.07 | 14.00 |
| <b>hyperhidrosis</b>                                         | 50 | 0.07 | 4.00  |
| <b>tungiasis</b>                                             | 50 | 0.07 | 36.00 |
| <b>acne cystic</b>                                           | 49 | 0.06 | 14.29 |
| <b>acquired autoimmune bullous diseaseherpes gestationis</b> | 49 | 0.06 | 2.04  |
| <b>dermatoliposclerosis</b>                                  | 49 | 0.06 | 4.08  |
| <b>diseases of bone</b>                                      | 49 | 0.06 | 6.12  |
| <b>irritant contact dermatitis</b>                           | 49 | 0.06 | 2.04  |
| <b>neurotic excoriations</b>                                 | 48 | 0.06 | 18.75 |
| <b>pachyonychia congenita</b>                                | 47 | 0.06 | 10.64 |
| <b>panarteritis nodosa kussmaul maier</b>                    | 47 | 0.06 | 10.64 |
| <b>wet to dry foot syndrome</b>                              | 47 | 0.06 | 8.51  |
| <b>psoriasis treatment</b>                                   | 46 | 0.06 | 10.87 |
| <b>warts filiformis</b>                                      | 46 | 0.06 | 13.04 |
| <b>angiolymploid hyperplasia with eosinophilia</b>           | 45 | 0.06 | 17.78 |
| <b>atrophy blanche</b>                                       | 45 | 0.06 | 6.67  |
| <b>ecthyma simplex</b>                                       | 45 | 0.06 | 26.67 |
| <b>relapsing polychondritis</b>                              | 45 | 0.06 | 6.67  |
| <b>skin diseases of pregnancy</b>                            | 45 | 0.06 | 6.67  |
| <b>koilonychia</b>                                           | 44 | 0.06 | 0.00  |
| <b>nail pigmentation</b>                                     | 44 | 0.06 | 9.09  |
| <b>acne rosacea</b>                                          | 43 | 0.06 | 6.98  |
| <b>cimicosis</b>                                             | 43 | 0.06 | 11.63 |
| <b>tylotic dermatitis</b>                                    | 43 | 0.06 | 2.33  |
| <b>cicatrical pemphigoid</b>                                 | 42 | 0.06 | 2.38  |
| <b>epidermolysis bullosa acquisita</b>                       | 42 | 0.06 | 9.52  |

|                                              |    |      |       |
|----------------------------------------------|----|------|-------|
| <b>onychogryphosis</b>                       | 42 | 0.06 | 7.14  |
| <b>psoriasis nails</b>                       | 42 | 0.06 | 11.90 |
| <b>acne papulopustulosa</b>                  | 41 | 0.05 | 9.76  |
| <b>trichomycosis</b>                         | 41 | 0.05 | 4.88  |
| <b>erythema craquele</b>                     | 40 | 0.05 | 2.50  |
| <b>erythema infectiosum</b>                  | 40 | 0.05 | 20.00 |
| <b>folliculitis cheloidalis</b>              | 40 | 0.05 | 20.00 |
| <b>fox fordyce disease</b>                   | 40 | 0.05 | 7.50  |
| <b>hidroa vacciniforme</b>                   | 40 | 0.05 | 12.50 |
| <b>rocky mountain spotted fever</b>          | 40 | 0.05 | 10.00 |
| <b>meningococemia</b>                        | 39 | 0.05 | 15.38 |
| <b>urticarial vasculitis</b>                 | 39 | 0.05 | 5.13  |
| <b>acne inversa</b>                          | 38 | 0.05 | 13.16 |
| <b>fissure</b>                               | 38 | 0.05 | 0.00  |
| <b>habit tic deformity</b>                   | 38 | 0.05 | 18.42 |
| <b>infantile atopic dermatitis</b>           | 38 | 0.05 | 7.89  |
| <b>schistosomiasis cutaneous</b>             | 38 | 0.05 | 7.89  |
| <b>stomatitis</b>                            | 38 | 0.05 | 13.16 |
| <b>acne fulminans</b>                        | 36 | 0.05 | 5.56  |
| <b>bacterial infections</b>                  | 36 | 0.05 | 2.78  |
| <b>trichostasis spinulosa</b>                | 36 | 0.05 | 2.78  |
| <b>cutis marmorata</b>                       | 35 | 0.05 | 5.71  |
| <b>granuloma</b>                             | 35 | 0.05 | 2.86  |
| <b>maceration</b>                            | 35 | 0.05 | 8.57  |
| <b>nail beading</b>                          | 35 | 0.05 | 5.71  |
| <b>nail polish dermatitis</b>                | 35 | 0.05 | 0.00  |
| <b>peripheral occlusive arterial disease</b> | 35 | 0.05 | 0.00  |
| <b>pseudofolliculitis barbae</b>             | 35 | 0.05 | 14.29 |
| <b>thrombocytopenic purpura idiopatic</b>    | 35 | 0.05 | 28.57 |
| <b>tinea ringworm face</b>                   | 35 | 0.05 | 5.71  |
| <b>atopic dermatitis infant phase</b>        | 34 | 0.04 | 2.94  |
| <b>herpes simplex virus</b>                  | 34 | 0.04 | 11.76 |
| <b>tinea incognito</b>                       | 34 | 0.04 | 17.65 |

|                                              |    |      |       |
|----------------------------------------------|----|------|-------|
| <b>acne scar</b>                             | 33 | 0.04 | 6.06  |
| <b>half and half nail</b>                    | 33 | 0.04 | 6.06  |
| <b>patch testing</b>                         | 33 | 0.04 | 15.15 |
| <b>twenty nail dystrophy</b>                 | 33 | 0.04 | 6.06  |
| <b>atopic eczema</b>                         | 32 | 0.04 | 3.12  |
| <b>gangrene</b>                              | 32 | 0.04 | 12.50 |
| <b>pomade acne</b>                           | 32 | 0.04 | 6.25  |
| <b>herpetic gingivostomatite</b>             | 31 | 0.04 | 12.90 |
| <b>painful bruising syndrome</b>             | 31 | 0.04 | 0.00  |
| <b>psoriatic erythroderma</b>                | 31 | 0.04 | 9.68  |
| <b>scrotal tongue</b>                        | 31 | 0.04 | 3.23  |
| <b>cat scratch disease</b>                   | 30 | 0.04 | 33.33 |
| <b>eczematid</b>                             | 30 | 0.04 | 3.33  |
| <b>lichen planus actinicus</b>               | 30 | 0.04 | 50.00 |
| <b>lichen planus linearis</b>                | 30 | 0.04 | 10.00 |
| <b>purpura fulminans</b>                     | 30 | 0.04 | 16.67 |
| <b>scrophuloderma</b>                        | 30 | 0.04 | 20.00 |
| <b>dermatitis ekzema</b>                     | 29 | 0.04 | 6.90  |
| <b>eczema face</b>                           | 29 | 0.04 | 3.45  |
| <b>gingival disease</b>                      | 29 | 0.04 | 10.34 |
| <b>herpes cutaneous</b>                      | 29 | 0.04 | 17.24 |
| <b>ischemia</b>                              | 29 | 0.04 | 6.90  |
| <b>tinea barbae</b>                          | 29 | 0.04 | 6.90  |
| <b>warts periungual</b>                      | 29 | 0.04 | 6.90  |
| <b>wells syndrome</b>                        | 29 | 0.04 | 27.59 |
| <b>chronic venous insufficiency grade ii</b> | 28 | 0.04 | 0.00  |
| <b>degos disease</b>                         | 28 | 0.04 | 25.00 |
| <b>nail cosmesis</b>                         | 28 | 0.04 | 7.14  |
| <b>parapsoriasis en plaques</b>              | 28 | 0.04 | 3.57  |
| <b>wart</b>                                  | 28 | 0.04 | 7.14  |
| <b>wound infection</b>                       | 28 | 0.04 | 10.71 |
| <b>acne closed comedo</b>                    | 27 | 0.04 | 11.11 |
| <b>acne neonatorum</b>                       | 27 | 0.04 | 11.11 |

|                                               |    |      |       |
|-----------------------------------------------|----|------|-------|
| <b>infected eczema</b>                        | 27 | 0.04 | 7.41  |
| <b>pemphigoid bullous pemphigoid</b>          | 27 | 0.04 | 11.11 |
| <b>rhus dermatitis</b>                        | 27 | 0.04 | 3.70  |
| <b>varicosis</b>                              | 27 | 0.04 | 11.11 |
| <b>caterpillar dermatitis</b>                 | 26 | 0.03 | 15.38 |
| <b>cercaria dermatitis</b>                    | 26 | 0.03 | 15.38 |
| <b>keratolysis exfoliativa</b>                | 26 | 0.03 | 0.00  |
| <b>myxoedema pretibial</b>                    | 26 | 0.03 | 11.54 |
| <b>rosacea nose</b>                           | 26 | 0.03 | 15.38 |
| <b>torus palantine</b>                        | 26 | 0.03 | 7.69  |
| <b>connective tissue disorders</b>            | 25 | 0.03 | 52.00 |
| <b>myiasis</b>                                | 25 | 0.03 | 24.00 |
| <b>nail ridging</b>                           | 25 | 0.03 | 0.00  |
| <b>nail trauma</b>                            | 25 | 0.03 | 4.00  |
| <b>onychoschizia</b>                          | 25 | 0.03 | 0.00  |
| <b>solar damage cutis rhomboidalis nuchae</b> | 25 | 0.03 | 12.00 |
| <b>warts flat</b>                             | 25 | 0.03 | 8.00  |
| <b>acroangiodermatitis</b>                    | 24 | 0.03 | 20.83 |
| <b>cholinergic urticaria</b>                  | 24 | 0.03 | 4.17  |
| <b>kawasaki syndrome</b>                      | 24 | 0.03 | 8.33  |
| <b>racquet nail</b>                           | 24 | 0.03 | 4.17  |
| <b>verrucae planae juveniles</b>              | 24 | 0.03 | 16.67 |
| <b>acute eczema</b>                           | 23 | 0.03 | 0.00  |
| <b>eczema fingertips</b>                      | 23 | 0.03 | 0.00  |
| <b>erysipeloid</b>                            | 23 | 0.03 | 4.35  |
| <b>granuloma multiforme</b>                   | 23 | 0.03 | 8.70  |
| <b>psoriasis scalp</b>                        | 23 | 0.03 | 4.35  |
| <b>urticaria vasculitis</b>                   | 23 | 0.03 | 4.35  |
| <b>acne pustular</b>                          | 22 | 0.03 | 22.73 |
| <b>atypical mycobacterium</b>                 | 22 | 0.03 | 18.18 |
| <b>reticular erythematous mucinosis</b>       | 22 | 0.03 | 0.00  |
| <b>fourniers gangrene</b>                     | 21 | 0.03 | 0.00  |
| <b>lichen planus penis</b>                    | 21 | 0.03 | 4.76  |



|                                            |    |      |       |
|--------------------------------------------|----|------|-------|
| <b>pincer nail syndrome</b>                | 21 | 0.03 | 0.00  |
| <b>thrombangiitis obliterans</b>           | 21 | 0.03 | 0.00  |
| <b>acanthoma fissuratum</b>                | 20 | 0.03 | 0.00  |
| <b>cryoglobulinemia</b>                    | 20 | 0.03 | 0.00  |
| <b>dry nails</b>                           | 20 | 0.03 | 15.00 |
| <b>lupus chronic cutaneous</b>             | 20 | 0.03 | 10.00 |
| <b>mucous membrane psoriasis</b>           | 20 | 0.03 | 15.00 |
| <b>small pox</b>                           | 20 | 0.03 | 25.00 |
| <b>decubitus ulcer</b>                     | 19 | 0.03 | 15.79 |
| <b>eczema arms</b>                         | 19 | 0.03 | 5.26  |
| <b>lichen planus oral</b>                  | 19 | 0.03 | 26.32 |
| <b>morphea linear</b>                      | 19 | 0.03 | 5.26  |
| <b>nodulo cystic acne vulgaris</b>         | 19 | 0.03 | 5.26  |
| <b>palmar wart</b>                         | 19 | 0.03 | 15.79 |
| <b>roseola infantum</b>                    | 19 | 0.03 | 21.05 |
| <b>scleromyxedema</b>                      | 19 | 0.03 | 0.00  |
| <b>warts oral</b>                          | 19 | 0.03 | 5.26  |
| <b>lichen planopilaris</b>                 | 18 | 0.02 | 5.56  |
| <b>lichen planus of the mucosa erosive</b> | 18 | 0.02 | 16.67 |
| <b>pemphigus mucosae</b>                   | 18 | 0.02 | 0.00  |
| <b>psoriasis inversa</b>                   | 18 | 0.02 | 11.11 |
| <b>streptococci anal penis</b>             | 18 | 0.02 | 11.11 |
| <b>tinea manuum</b>                        | 18 | 0.02 | 0.00  |
| <b>enterovirus</b>                         | 17 | 0.02 | 11.76 |
| <b>glanzmanns thrombasthenia</b>           | 17 | 0.02 | 0.00  |
| <b>nail shedding</b>                       | 17 | 0.02 | 5.88  |
| <b>pseudomonas</b>                         | 17 | 0.02 | 5.88  |
| <b>warts cryotherapy</b>                   | 17 | 0.02 | 5.88  |
| <b>dermatosis neglecta</b>                 | 16 | 0.02 | 0.00  |
| <b>diabetic gangrene</b>                   | 16 | 0.02 | 18.75 |
| <b>eosinophilic pustular folliculitis</b>  | 16 | 0.02 | 6.25  |
| <b>morphoea generalized</b>                | 16 | 0.02 | 12.50 |
| <b>parasitoses bites</b>                   | 16 | 0.02 | 31.25 |

|                                                     |    |      |       |
|-----------------------------------------------------|----|------|-------|
| <b>acne cystica</b>                                 | 15 | 0.02 | 13.33 |
| <b>eosinophilic ulcer of the tongue</b>             | 15 | 0.02 | 6.67  |
| <b>gram negative infection of the foot</b>          | 15 | 0.02 | 6.67  |
| <b>herpes buttocks</b>                              | 15 | 0.02 | 13.33 |
| <b>lichen planus vesicular</b>                      | 15 | 0.02 | 40.00 |
| <b>warts plantaris</b>                              | 15 | 0.02 | 0.00  |
| <b>culicosis bullosa</b>                            | 14 | 0.02 | 7.14  |
| <b>eczema leg</b>                                   | 14 | 0.02 | 7.14  |
| <b>erythema elevatum diutinum</b>                   | 14 | 0.02 | 14.29 |
| <b>gloves and socks syndrome</b>                    | 14 | 0.02 | 0.00  |
| <b>mononucleosis ampicillin syndrome</b>            | 14 | 0.02 | 0.00  |
| <b>pyoderma faciale</b>                             | 14 | 0.02 | 28.57 |
| <b>rosacea steroid</b>                              | 14 | 0.02 | 0.00  |
| <b>warts mouth</b>                                  | 14 | 0.02 | 7.14  |
| <b>warts plane</b>                                  | 14 | 0.02 | 0.00  |
| <b>benign mucosal pemphigoid</b>                    | 13 | 0.02 | 0.00  |
| <b>erysipelas bullosum</b>                          | 13 | 0.02 | 0.00  |
| <b>heels dry cracked</b>                            | 13 | 0.02 | 30.77 |
| <b>notalgia paraesthetica</b>                       | 13 | 0.02 | 0.00  |
| <b>progressive systemic scleroderma</b>             | 13 | 0.02 | 7.69  |
| <b>psoriasis guttate</b>                            | 13 | 0.02 | 7.69  |
| <b>subacute cutaneous lupus erythematosus scler</b> | 13 | 0.02 | 0.00  |
| <b>uvl burn</b>                                     | 13 | 0.02 | 0.00  |
| <b>wound dehiscence</b>                             | 13 | 0.02 | 7.69  |
| <b>acne necrotica</b>                               | 12 | 0.02 | 25.00 |
| <b>allergic hand eczema</b>                         | 12 | 0.02 | 0.00  |
| <b>alopecia acquisitum centrifugum</b>              | 12 | 0.02 | 33.33 |
| <b>eczema anal</b>                                  | 12 | 0.02 | 0.00  |
| <b>elephantiasis nostras verrucosa</b>              | 12 | 0.02 | 16.67 |
| <b>hecks disease</b>                                | 12 | 0.02 | 0.00  |
| <b>herpes simplex genitalis</b>                     | 12 | 0.02 | 41.67 |
| <b>pterygium inversum unguis</b>                    | 12 | 0.02 | 0.00  |

|                                                   |    |      |       |
|---------------------------------------------------|----|------|-------|
| <b>syringolymphoid hyperplasia with alopecia</b>  | 12 | 0.02 | 16.67 |
| <b>atopic eczema of the hands</b>                 | 11 | 0.01 | 0.00  |
| <b>eczema scrotum</b>                             | 11 | 0.01 | 9.09  |
| <b>herpes simplex labialis</b>                    | 11 | 0.01 | 0.00  |
| <b>leukoedema oral</b>                            | 11 | 0.01 | 27.27 |
| <b>lichen planus hypertrophic</b>                 | 11 | 0.01 | 72.73 |
| <b>metal dermatitis</b>                           | 11 | 0.01 | 18.18 |
| <b>polychondritis</b>                             | 11 | 0.01 | 0.00  |
| <b>psoriasis hand</b>                             | 11 | 0.01 | 27.27 |
| <b>tinea ringworm hand dorsum</b>                 | 11 | 0.01 | 0.00  |
| <b>balanitis bacterial</b>                        | 10 | 0.01 | 0.00  |
| <b>candidiasis mouth</b>                          | 10 | 0.01 | 10.00 |
| <b>diabetic bullae</b>                            | 10 | 0.01 | 10.00 |
| <b>eczema ears</b>                                | 10 | 0.01 | 20.00 |
| <b>lymphangitis acute lymphangitis</b>            | 10 | 0.01 | 40.00 |
| <b>pseudomonas folliculitis</b>                   | 10 | 0.01 | 10.00 |
| <b>tinea ringworm scalp</b>                       | 10 | 0.01 | 20.00 |
| <b>erosio interdigitalis blastomycetica</b>       | 9  | 0.01 | 0.00  |
| <b>erythromelalgia</b>                            | 9  | 0.01 | 11.11 |
| <b>localized pemphigoid</b>                       | 9  | 0.01 | 0.00  |
| <b>morphoea nodular</b>                           | 9  | 0.01 | 0.00  |
| <b>morsicatio buccarum</b>                        | 9  | 0.01 | 0.00  |
| <b>pemphigus foliaceus localized form</b>         | 9  | 0.01 | 11.11 |
| <b>portuguese man of war dermatitis</b>           | 9  | 0.01 | 0.00  |
| <b>acne infantile</b>                             | 8  | 0.01 | 0.00  |
| <b>atopic dermatitis childhood phase</b>          | 8  | 0.01 | 0.00  |
| <b>eczema microbic</b>                            | 8  | 0.01 | 0.00  |
| <b>morphoea localized</b>                         | 8  | 0.01 | 0.00  |
| <b>onychogryphosis and onychauxis</b>             | 8  | 0.01 | 0.00  |
| <b>pemphigus vegetant</b>                         | 8  | 0.01 | 50.00 |
| <b>psoriasis vulgaris chronic stationary type</b> | 8  | 0.01 | 0.00  |
| <b>shaving folliculitis</b>                       | 8  | 0.01 | 12.50 |

|                                                     |   |      |       |
|-----------------------------------------------------|---|------|-------|
| <b>acne comedonica</b>                              | 7 | 0.01 | 0.00  |
| <b>axillary granular parakeratosis</b>              | 7 | 0.01 | 0.00  |
| <b>distal splitting hang nail</b>                   | 7 | 0.01 | 0.00  |
| <b>drug lichenoid eruption</b>                      | 7 | 0.01 | 0.00  |
| <b>eczema foot</b>                                  | 7 | 0.01 | 0.00  |
| <b>eczema impetiginized</b>                         | 7 | 0.01 | 0.00  |
| <b>eczema subacute</b>                              | 7 | 0.01 | 14.29 |
| <b>lichen planus of the mucosa</b>                  | 7 | 0.01 | 0.00  |
| <b>linear scleroderma</b>                           | 7 | 0.01 | 14.29 |
| <b>lingua plicata</b>                               | 7 | 0.01 | 0.00  |
| <b>onychodystrophia mediana canaliformis</b>        | 7 | 0.01 | 0.00  |
| <b>psoriasis arthropathica</b>                      | 7 | 0.01 | 0.00  |
| <b>psoriasis hiv</b>                                | 7 | 0.01 | 0.00  |
| <b>psoriasis infants</b>                            | 7 | 0.01 | 14.29 |
| <b>warts plantar</b>                                | 7 | 0.01 | 14.29 |
| <b>acne open comedo</b>                             | 6 | 0.01 | 0.00  |
| <b>ant bite</b>                                     | 6 | 0.01 | 16.67 |
| <b>blue nails minocycline</b>                       | 6 | 0.01 | 16.67 |
| <b>chronic cutaneous graft versus host reaction</b> | 6 | 0.01 | 16.67 |
| <b>dermatitis swimming</b>                          | 6 | 0.01 | 0.00  |
| <b>disseminated lokalized scleroderma</b>           | 6 | 0.01 | 0.00  |
| <b>herpes type recurrent</b>                        | 6 | 0.01 | 0.00  |
| <b>lichen planus annular</b>                        | 6 | 0.01 | 50.00 |
| <b>lipoatrophy postherpetic lipoatrophy</b>         | 6 | 0.01 | 0.00  |
| <b>localized scleroderma</b>                        | 6 | 0.01 | 16.67 |
| <b>lupus erythematosus tumidus</b>                  | 6 | 0.01 | 0.00  |
| <b>phlebitis superficial</b>                        | 6 | 0.01 | 0.00  |
| <b>primary tufted hairs</b>                         | 6 | 0.01 | 16.67 |
| <b>psoriasis anus</b>                               | 6 | 0.01 | 16.67 |
| <b>staphylococcal folliculitis</b>                  | 6 | 0.01 | 16.67 |
| <b>warts immunocompromised</b>                      | 6 | 0.01 | 0.00  |
| <b>contact dermatitis leg ulcers</b>                | 5 | 0.01 | 60.00 |

|                                                                   |   |      |       |
|-------------------------------------------------------------------|---|------|-------|
| <b>eczema areola</b>                                              | 5 | 0.01 | 0.00  |
| <b>herpes immunocompromised</b>                                   | 5 | 0.01 | 20.00 |
| <b>herpes simplex oralis</b>                                      | 5 | 0.01 | 0.00  |
| <b>hyperkeratotic fissured hand and foot eczema</b>               | 5 | 0.01 | 20.00 |
| <b>lichen planus exanthematicus</b>                               | 5 | 0.01 | 20.00 |
| <b>lupus miliaris disseminatus faciei</b>                         | 5 | 0.01 | 0.00  |
| <b>malassezia folliculitis</b>                                    | 5 | 0.01 | 20.00 |
| <b>pachyonychia congenita hereditaria</b>                         | 5 | 0.01 | 20.00 |
| <b>primary herpes simplex virus</b>                               | 5 | 0.01 | 20.00 |
| <b>psoriasis penis</b>                                            | 5 | 0.01 | 0.00  |
| <b>psoriasis psoriasis after erysipelas</b>                       | 5 | 0.01 | 20.00 |
| <b>superficial fungal infections</b>                              | 5 | 0.01 | 0.00  |
| <b>sycosis barbae</b>                                             | 5 | 0.01 | 0.00  |
| <b>tinea ringworm foot dorsum</b>                                 | 5 | 0.01 | 0.00  |
| <b>ulcus cruris mixtum</b>                                        | 5 | 0.01 | 20.00 |
| <b>urticaria acute</b>                                            | 5 | 0.01 | 0.00  |
| <b>cosmetic fragrance allergy</b>                                 | 4 | 0.01 | 25.00 |
| <b>folliculitis of barbae</b>                                     | 4 | 0.01 | 0.00  |
| <b>herpes type primary</b>                                        | 4 | 0.01 | 0.00  |
| <b>lichen planus follicularis</b>                                 | 4 | 0.01 | 0.00  |
| <b>lichen planus palm soles</b>                                   | 4 | 0.01 | 0.00  |
| <b>lichen planus verrucosus</b>                                   | 4 | 0.01 | 0.00  |
| <b>lupus erythematosus subacute cutaneous lupus erythematosus</b> | 4 | 0.01 | 25.00 |
| <b>tinea barbae profunda</b>                                      | 4 | 0.01 | 25.00 |
| <b>tinea capitis profunda</b>                                     | 4 | 0.01 | 0.00  |
| <b>tinea ringworm border</b>                                      | 4 | 0.01 | 0.00  |
| <b>zoster gangraenosus</b>                                        | 4 | 0.01 | 0.00  |
| <b>eczema lids</b>                                                | 3 | 0.00 | 0.00  |
| <b>eczema trunk generalized</b>                                   | 3 | 0.00 | 0.00  |
| <b>eczema vulva</b>                                               | 3 | 0.00 | 0.00  |
| <b>lichen planus annularis</b>                                    | 3 | 0.00 | 0.00  |
| <b>lichen planus hypertrophicus</b>                               | 3 | 0.00 | 0.00  |

|                               |                                                  |     |      |        |
|-------------------------------|--------------------------------------------------|-----|------|--------|
|                               | <b>lupus erythematosus systemic</b>              | 3   | 0.00 | 33.33  |
|                               | <b>psoriasis light sensitive</b>                 | 3   | 0.00 | 33.33  |
|                               | <b>psoriasis vulgaris nail changes</b>           | 3   | 0.00 | 0.00   |
|                               | <b>ridging beading</b>                           | 3   | 0.00 | 0.00   |
|                               | <b>tinea capitis superficialis</b>               | 3   | 0.00 | 0.00   |
|                               | <b>tinea ringworm beard</b>                      | 3   | 0.00 | 0.00   |
|                               | <b>tinea ringworm groin</b>                      | 3   | 0.00 | 0.00   |
|                               | <b>tinea ringworm palm</b>                       | 3   | 0.00 | 33.33  |
|                               | <b>urticaria factitia</b>                        | 3   | 0.00 | 0.00   |
|                               | <b>warts digitate</b>                            | 3   | 0.00 | 0.00   |
|                               | <b>atopic dermatitis hyperlinear creases</b>     | 2   | 0.00 | 0.00   |
|                               | <b>tinea ringworm foot plantar</b>               | 2   | 0.00 | 0.00   |
|                               | <b>tinea ringworm foot webs</b>                  | 2   | 0.00 | 0.00   |
|                               | <b>tinea ringworm incognito</b>                  | 2   | 0.00 | 0.00   |
|                               | <b>ulcus cruris venosum</b>                      | 2   | 0.00 | 0.00   |
|                               | <b>eczema acute</b>                              | 1   | 0.00 | 0.00   |
|                               | <b>eczema chronic</b>                            | 1   | 0.00 | 0.00   |
|                               | <b>hematogenous allergic contact dermatitis</b>  | 1   | 0.00 | 0.00   |
|                               | <b>interstitial granulomatous dermatitis</b>     | 1   | 0.00 | 100.00 |
|                               | <b>lichen planus drug</b>                        | 1   | 0.00 | 0.00   |
|                               | <b>lichen planus vaginal</b>                     | 1   | 0.00 | 0.00   |
|                               | <b>lupus erythematosus chronicus discoides</b>   | 1   | 0.00 | 0.00   |
|                               | <b>lupus erythematosus mucosae oris</b>          | 1   | 0.00 | 0.00   |
|                               | <b>psoriasis nail psoriasis</b>                  | 1   | 0.00 | 0.00   |
|                               | <b>psoriasis palmoplantaris</b>                  | 1   | 0.00 | 0.00   |
|                               | <b>psoriasis vulgaris guttate type</b>           | 1   | 0.00 | 0.00   |
|                               | <b>tinea ringworm nigra</b>                      | 1   | 0.00 | 0.00   |
|                               | <b>tinea ringworm primary lesion</b>             | 1   | 0.00 | 0.00   |
|                               | <b>warts common</b>                              | 1   | 0.00 | 0.00   |
|                               | <b>systemic carcinomas</b>                       | 431 | 0.57 | 9.98   |
| <b>Malignant dermal tumor</b> | <b>intermediate or malignant vascular tumors</b> | 172 | 0.23 | 22.09  |

|                                 |                                                            |      |      |       |
|---------------------------------|------------------------------------------------------------|------|------|-------|
|                                 | <b>dermatofibrosarcoma protuberans</b>                     | 89   | 0.12 | 8.99  |
|                                 | <b>merkel cell carcinoma</b>                               | 59   | 0.08 | 3.39  |
|                                 | <b>sarcoma</b>                                             | 34   | 0.04 | 2.94  |
|                                 | <b>malignant adnexal tumors</b>                            | 21   | 0.03 | 9.52  |
|                                 | <b>abrikossofs tumour of skin</b>                          | 16   | 0.02 | 12.50 |
|                                 | <b>soft tissue tumors</b>                                  | 15   | 0.02 | 6.67  |
|                                 | <b>adenocarcinoma in the submandibular salivary glands</b> | 5    | 0.01 | 0.00  |
|                                 | <b>melanocytic nevi</b>                                    | 1359 | 1.79 | 4.19  |
|                                 | <b>blue nevus</b>                                          | 651  | 0.86 | 4.76  |
|                                 | <b>intra-dermal nevus</b>                                  | 439  | 0.58 | 8.88  |
|                                 | <b>atypical nevi</b>                                       | 385  | 0.51 | 10.13 |
|                                 | <b>congenital nevus</b>                                    | 138  | 0.18 | 6.52  |
|                                 | <b>halo nevus</b>                                          | 105  | 0.14 | 14.29 |
|                                 | <b>nevus incipiens</b>                                     | 105  | 0.14 | 2.86  |
|                                 | <b>nevus spilus</b>                                        | 66   | 0.09 | 9.09  |
|                                 | <b>café au lait spot</b>                                   | 65   | 0.09 | 9.23  |
|                                 | <b>melanosis neurocutanea</b>                              | 65   | 0.09 | 16.92 |
|                                 | <b>solar lentigo</b>                                       | 60   | 0.08 | 3.33  |
|                                 | <b>combined nevus</b>                                      | 51   | 0.07 | 0.00  |
| <b>Pigmented lesions benign</b> | <b>mongolian spot</b>                                      | 50   | 0.07 | 6.00  |
|                                 | <b>nevocytic nevus</b>                                     | 46   | 0.06 | 4.35  |
|                                 | <b>naevus blue</b>                                         | 44   | 0.06 | 11.36 |
|                                 | <b>giant melanocytic nevus</b>                             | 40   | 0.05 | 17.50 |
|                                 | <b>black heel</b>                                          | 39   | 0.05 | 10.26 |
|                                 | <b>melanonychia striata</b>                                | 38   | 0.05 | 7.89  |
|                                 | <b>mucosal lentiginos</b>                                  | 36   | 0.05 | 0.00  |
|                                 | <b>blue nevus ota</b>                                      | 35   | 0.05 | 17.14 |
|                                 | <b>spindle cell nevus</b>                                  | 35   | 0.05 | 11.43 |
|                                 | <b>naevus halo</b>                                         | 34   | 0.04 | 20.59 |
|                                 | <b>ephelides</b>                                           | 33   | 0.04 | 3.03  |
|                                 | <b>nevus cell nevus</b>                                    | 30   | 0.04 | 16.67 |
|                                 | <b>hereditary dysplastic nevus syndrome</b>                | 29   | 0.04 | 20.69 |

|                                    |                                           |       |        |       |
|------------------------------------|-------------------------------------------|-------|--------|-------|
|                                    | <b>naevus achromic</b>                    | 28    | 0.04   | 7.14  |
|                                    | <b>melanoma mimic</b>                     | 26    | 0.03   | 0.00  |
|                                    | <b>lentigo senilis</b>                    | 25    | 0.03   | 0.00  |
|                                    | <b>lentigo simplex</b>                    | 25    | 0.03   | 0.00  |
|                                    | <b>melanotic macule</b>                   | 22    | 0.03   | 4.55  |
|                                    | <b>spitz nevus</b>                        | 20    | 0.03   | 0.00  |
|                                    | <b>nevus repigmented</b>                  | 19    | 0.03   | 10.53 |
|                                    | <b>nail nevus</b>                         | 18    | 0.02   | 11.11 |
|                                    | <b>ink spot nevus</b>                     | 16    | 0.02   | 0.00  |
|                                    | <b>naevus of ota bilateral type</b>       | 15    | 0.02   | 0.00  |
|                                    | <b>nevus pigmentosus et pilosus</b>       | 13    | 0.02   | 7.69  |
|                                    | <b>naevus giant pigmented</b>             | 11    | 0.01   | 0.00  |
|                                    | <b>labial melanotic macule</b>            | 4     | 0.01   | 25.00 |
|                                    | <b>malignant melanoma</b>                 | 1166  | 1.54   | 7.29  |
|                                    | <b>lentigo maligna melanoma</b>           | 97    | 0.13   | 2.06  |
|                                    | <b>lentigo maligna</b>                    | 64    | 0.08   | 6.25  |
|                                    | <b>nail melanoma</b>                      | 51    | 0.07   | 7.84  |
|                                    | <b>metastatic melanoma</b>                | 45    | 0.06   | 13.33 |
|                                    | <b>nodular melanoma nm</b>                | 35    | 0.05   | 0.00  |
| <b>Pigmented lesions malignant</b> | <b>superficial spreading melanoma ssm</b> | 24    | 0.03   | 0.00  |
|                                    | <b>amelanotic malignant melanoma amm</b>  | 19    | 0.03   | 0.00  |
|                                    | <b>melanoma of the parotid</b>            | 11    | 0.01   | 18.18 |
|                                    | <b>mucosal melanoma</b>                   | 9     | 0.01   | 11.11 |
|                                    | <b>acrolentiginous melanoma alm</b>       | 7     | 0.01   | 14.29 |
|                                    | <b>malignant melanoma metastatic</b>      | 3     | 0.00   | 0.00  |
|                                    | <b>All</b>                                | 75730 | 100.00 | 11.96 |



Supplementary Table 4: Frequency Table and False Positive Rates of Diagnoses in the Danderm Repository

Frequency table of diagnoses and False Positive Rates of evaluated skin lesion images in the Danderm repository.

All, Number of all evaluated skin lesion images in the Danderm repository; FPR, False positive rate (%) of the diagnosis in the Danderm repository; n, Number of occurrences of diagnosis; Unknown, Diagnosis unknown or unmapped; %, Percentage of diagnosis in relation to all evaluated skin lesion images in the Danderm repository.

| Category                                             | Diagnosis                               | n  | %    | FPR   |
|------------------------------------------------------|-----------------------------------------|----|------|-------|
| Benign dermal tumors cysts sinuses                   | hemangioma                              | 44 | 1.28 | 0.00  |
|                                                      | pyogenic granuloma                      | 10 | 0.29 | 0.00  |
|                                                      | dermatofibroma                          | 8  | 0.23 | 12.50 |
|                                                      | nevus flammeus                          | 8  | 0.23 | 0.00  |
|                                                      | sebaceous hyperplasia                   | 6  | 0.17 | 0.00  |
|                                                      | leiomyoma                               | 5  | 0.15 | 0.00  |
|                                                      | myxoid cyst                             | 5  | 0.15 | 40.00 |
|                                                      | skin tag                                | 5  | 0.15 | 0.00  |
|                                                      | cylindroma                              | 3  | 0.09 | 0.00  |
|                                                      | lymphangioma                            | 3  | 0.09 | 0.00  |
|                                                      | pilar cyst                              | 3  | 0.09 | 0.00  |
|                                                      | spider angioma                          | 1  | 0.03 | 0.00  |
| Cutaneous lymphoma and lymphoid infiltrates          | cutaneous t cell lymphoma               | 19 | 0.55 | 0.00  |
|                                                      | erythema arciforme et palpabile migrans | 11 | 0.32 | 9.09  |
|                                                      | lymphomas lymphocytic infiltrations     | 10 | 0.29 | 0.00  |
|                                                      | lymphoma b cell                         | 2  | 0.06 | 0.00  |
| Epidermal tumors hamartomas milia and growths benign | seborrheic keratosis                    | 29 | 0.84 | 3.45  |
|                                                      | epidermal nevus                         | 12 | 0.35 | 0.00  |
|                                                      | porokeratosis                           | 11 | 0.32 | 0.00  |
|                                                      | dermatosis papulosa nigra               | 9  | 0.26 | 11.11 |
|                                                      | prurigo nodularis                       | 7  | 0.20 | 57.14 |
|                                                      | milia                                   | 5  | 0.15 | 20.00 |

|                                                     |                                              |      |      |      |
|-----------------------------------------------------|----------------------------------------------|------|------|------|
| <b>Epidermal tumors pre malignant and malignant</b> | <b>basal cell carcinoma</b>                  | 51   | 1.49 | 0.00 |
|                                                     | <b>actinic keratosis</b>                     | 28   | 0.82 | 0.00 |
|                                                     | <b>squamous cell carcinoma</b>               | 16   | 0.47 | 0.00 |
|                                                     | <b>bowens disease</b>                        | 9    | 0.26 | 0.00 |
|                                                     | <b>keratoacanthoma</b>                       | 9    | 0.26 | 0.00 |
|                                                     | <b>cutaneous horn</b>                        | 7    | 0.20 | 0.00 |
|                                                     | <b>actinic cheilitis</b>                     | 5    | 0.15 | 0.00 |
|                                                     | <b>pagets disease</b>                        | 5    | 0.15 | 0.00 |
|                                                     | <b>extramammary paget disease</b>            | 3    | 0.09 | 0.00 |
| <b>Genodermatoses and supernumerary growths</b>     | <b>dariers disease</b>                       | 13   | 0.38 | 7.69 |
|                                                     | <b>congenital ichthyosiform erythroderma</b> | 9    | 0.26 | 0.00 |
|                                                     | <b>ichthyosis</b>                            | 8    | 0.23 | 0.00 |
|                                                     | <b>incontinentia pigmenti</b>                | 6    | 0.17 | 0.00 |
|                                                     | <b>rendu osler syndrome</b>                  | 6    | 0.17 | 0.00 |
|                                                     | <b>neurofibromatosis</b>                     | 5    | 0.15 | 0.00 |
|                                                     | <b>pseudoxanthoma elasticum</b>              | 5    | 0.15 | 0.00 |
|                                                     | <b>acrokeratosis verruciformis</b>           | 4    | 0.12 | 0.00 |
|                                                     | <b>erythrokeratoderma variabilis</b>         | 4    | 0.12 | 0.00 |
| <b>Inflammatory</b>                                 | <b>allergic contact dermatitis</b>           | 129  | 3.76 | 3.10 |
|                                                     | <b>irritant contact dermatitis</b>           | 93   | 2.71 | 8.60 |
|                                                     | <b>bacterial infections</b>                  | 91   | 2.65 | 2.20 |
|                                                     | <b>atopic dermatitis</b>                     | 88   | 2.56 | 1.14 |
|                                                     | <b>lichen planus</b>                         | 76   | 2.21 | 2.63 |
|                                                     | <b>acne vulgaris</b>                         | 75   | 2.19 | 5.33 |
|                                                     | <b>fungal infections dermal and subcut</b>   | 68   | 1.98 | 1.47 |
|                                                     | <b>seborrheic dermatitis</b>                 | 65   | 1.89 | 0.00 |
|                                                     | <b>psoriasis</b>                             | 64   | 1.86 | 4.69 |
|                                                     | <b>drug eruption</b>                         | 53   | 1.54 | 5.66 |
|                                                     | <b>virus exanthem</b>                        | 48   | 1.40 | 4.17 |
|                                                     | <b>non scarring alopecia</b>                 | 46   | 1.34 | 4.35 |
|                                                     | <b>bullous pemphigoid</b>                    | 39   | 1.14 | 7.69 |
| <b>urticaria</b>                                    | 39                                           | 1.14 | 7.69 |      |
| <b>lichen</b>                                       | 34                                           | 0.99 | 2.94 |      |

|                                                     |    |      |       |
|-----------------------------------------------------|----|------|-------|
| <b>nail trauma</b>                                  | 29 | 0.84 | 0.00  |
| <b>erythema multiforme and fixed drug eruptions</b> | 26 | 0.76 | 0.00  |
| <b>rosacea</b>                                      | 26 | 0.76 | 0.00  |
| <b>impetigo</b>                                     | 24 | 0.70 | 0.00  |
| <b>lupus erythematosus systemic</b>                 | 24 | 0.70 | 0.00  |
| <b>ulcer</b>                                        | 24 | 0.70 | 0.00  |
| <b>purpura</b>                                      | 23 | 0.67 | 0.00  |
| <b>herpes zoster</b>                                | 22 | 0.64 | 4.55  |
| <b>planar warts</b>                                 | 22 | 0.64 | 0.00  |
| <b>psoriasis chronic plaque</b>                     | 22 | 0.64 | 0.00  |
| <b>mastocytosis</b>                                 | 20 | 0.58 | 0.00  |
| <b>psoriasis nails</b>                              | 20 | 0.58 | 0.00  |
| <b>genital warts</b>                                | 18 | 0.52 | 0.00  |
| <b>scleroderma</b>                                  | 18 | 0.52 | 0.00  |
| <b>sun damaged skin</b>                             | 18 | 0.52 | 0.00  |
| <b>varicella</b>                                    | 16 | 0.47 | 12.50 |
| <b>onychomycosis</b>                                | 15 | 0.44 | 0.00  |
| <b>scarring alopecia</b>                            | 15 | 0.44 | 0.00  |
| <b>acne cystic</b>                                  | 14 | 0.41 | 0.00  |
| <b>dermatomyositis</b>                              | 14 | 0.41 | 7.14  |
| <b>herpes simplex</b>                               | 14 | 0.41 | 0.00  |
| <b>parapsoriasis en plaques</b>                     | 14 | 0.41 | 0.00  |
| <b>psoriasis scalp</b>                              | 14 | 0.41 | 7.14  |
| <b>tinea manus</b>                                  | 14 | 0.41 | 0.00  |
| <b>tinea versicolor</b>                             | 14 | 0.41 | 0.00  |
| <b>candidiasis</b>                                  | 13 | 0.38 | 7.69  |
| <b>granuloma annulare</b>                           | 13 | 0.38 | 7.69  |
| <b>molluscum contagiosum</b>                        | 13 | 0.38 | 15.38 |
| <b>vasculitis</b>                                   | 13 | 0.38 | 0.00  |
| <b>wart</b>                                         | 13 | 0.38 | 7.69  |
| <b>alopecia</b>                                     | 12 | 0.35 | 8.33  |
| <b>contact dermatitis</b>                           | 12 | 0.35 | 0.00  |

|                                    |    |      |       |
|------------------------------------|----|------|-------|
| <b>eczema herpeticum</b>           | 12 | 0.35 | 0.00  |
| <b>herpes simplex genitalis</b>    | 12 | 0.35 | 0.00  |
| <b>miliaria</b>                    | 12 | 0.35 | 0.00  |
| <b>neurotic excoriations</b>       | 12 | 0.35 | 0.00  |
| <b>pityriasis rubra pilaris</b>    | 12 | 0.35 | 0.00  |
| <b>psoriasis hand</b>              | 12 | 0.35 | 0.00  |
| <b>scabies</b>                     | 12 | 0.35 | 0.00  |
| <b>factitial dermatitis</b>        | 11 | 0.32 | 0.00  |
| <b>hyperhidrosis</b>               | 11 | 0.32 | 0.00  |
| <b>photodermatoses</b>             | 11 | 0.32 | 9.09  |
| <b>stomatitis</b>                  | 11 | 0.32 | 0.00  |
| <b>sunburn</b>                     | 11 | 0.32 | 18.18 |
| <b>syphilis</b>                    | 10 | 0.29 | 0.00  |
| <b>sarcoidosis</b>                 | 9  | 0.26 | 0.00  |
| <b>acne keloidalis</b>             | 8  | 0.23 | 0.00  |
| <b>biting fleas</b>                | 8  | 0.23 | 12.50 |
| <b>discoid lupus erythematosus</b> | 8  | 0.23 | 0.00  |
| <b>erysipelas</b>                  | 8  | 0.23 | 0.00  |
| <b>erythema craquele</b>           | 8  | 0.23 | 25.00 |
| <b>erythrasma</b>                  | 8  | 0.23 | 0.00  |
| <b>necrobiosis lipoidica</b>       | 8  | 0.23 | 0.00  |
| <b>poikiloderma civatte</b>        | 8  | 0.23 | 0.00  |
| <b>psoriasis arthropathica</b>     | 8  | 0.23 | 0.00  |
| <b>acne fulminans</b>              | 7  | 0.20 | 0.00  |
| <b>acne scar</b>                   | 7  | 0.20 | 0.00  |
| <b>eczema nummular</b>             | 7  | 0.20 | 0.00  |
| <b>lichen planopilaris</b>         | 7  | 0.20 | 0.00  |
| <b>lichen planus penis</b>         | 7  | 0.20 | 0.00  |
| <b>pernio and mimics</b>           | 7  | 0.20 | 14.29 |
| <b>pincer nails</b>                | 7  | 0.20 | 0.00  |
| <b>pityriasis rosea</b>            | 7  | 0.20 | 0.00  |
| <b>cholinergic urticaria</b>       | 6  | 0.17 | 0.00  |
| <b>clubbing</b>                    | 6  | 0.17 | 0.00  |

|                                                                       |   |      |       |
|-----------------------------------------------------------------------|---|------|-------|
| <b>connective tissue disorders</b>                                    | 6 | 0.17 | 0.00  |
| <b>diabetic ulcer</b>                                                 | 6 | 0.17 | 0.00  |
| <b>eczema</b>                                                         | 6 | 0.17 | 0.00  |
| <b>hidradenitis</b>                                                   | 6 | 0.17 | 0.00  |
| <b>lupus vulgaris</b>                                                 | 6 | 0.17 | 0.00  |
| <b>pseudofolliculitis barbae</b>                                      | 6 | 0.17 | 0.00  |
| <b>psoriatic erythroderma</b>                                         | 6 | 0.17 | 16.67 |
| <b>raynauds disease</b>                                               | 6 | 0.17 | 0.00  |
| <b>reiters disease</b>                                                | 6 | 0.17 | 0.00  |
| <b>solar elastosis</b>                                                | 6 | 0.17 | 0.00  |
| <b>staphylococcal folliculitis</b>                                    | 6 | 0.17 | 0.00  |
| <b>behcets disease</b>                                                | 5 | 0.15 | 20.00 |
| <b>eczema acute</b>                                                   | 5 | 0.15 | 0.00  |
| <b>eczema hand</b>                                                    | 5 | 0.15 | 0.00  |
| <b>guttate psoriasis</b>                                              | 5 | 0.15 | 20.00 |
| <b>hand foot mouth</b>                                                | 5 | 0.15 | 80.00 |
| <b>inverse psoriasis</b>                                              | 5 | 0.15 | 20.00 |
| <b>koilonychia</b>                                                    | 5 | 0.15 | 0.00  |
| <b>leukonychia</b>                                                    | 5 | 0.15 | 0.00  |
| <b>lichen nitidus</b>                                                 | 5 | 0.15 | 0.00  |
| <b>lichen planus hypertrophic</b>                                     | 5 | 0.15 | 20.00 |
| <b>lupus erythematosus subacute<br/>cutaneous lupus erythematosus</b> | 5 | 0.15 | 0.00  |
| <b>onychodystrophia mediana<br/>canaliformis</b>                      | 5 | 0.15 | 0.00  |
| <b>papulose bowenoide</b>                                             | 5 | 0.15 | 0.00  |
| <b>relapsing polychondritis</b>                                       | 5 | 0.15 | 0.00  |
| <b>scarring</b>                                                       | 5 | 0.15 | 0.00  |
| <b>steroid acne</b>                                                   | 5 | 0.15 | 0.00  |
| <b>tinea faciei</b>                                                   | 5 | 0.15 | 0.00  |
| <b>caterpillar dermatitis</b>                                         | 4 | 0.12 | 0.00  |
| <b>folliculitis</b>                                                   | 4 | 0.12 | 0.00  |
| <b>onycholysis</b>                                                    | 4 | 0.12 | 0.00  |
| <b>staphylococcal scalded skin syndrome</b>                           | 4 | 0.12 | 0.00  |

|                                    |                                    |             |               |             |
|------------------------------------|------------------------------------|-------------|---------------|-------------|
|                                    | xanthomas                          | 4           | 0.12          | 0.00        |
|                                    | acne neonatorum                    | 3           | 0.09          | 0.00        |
|                                    | balanitis                          | 3           | 0.09          | 0.00        |
|                                    | cimicosis                          | 3           | 0.09          | 0.00        |
|                                    | dermatitis herpetiformis           | 3           | 0.09          | 33.33       |
|                                    | erythema infectiosum               | 3           | 0.09          | 0.00        |
|                                    | erythroderma                       | 3           | 0.09          | 0.00        |
|                                    | gangrene                           | 3           | 0.09          | 0.00        |
|                                    | geographic tongue                  | 3           | 0.09          | 0.00        |
|                                    | pemphigus foliaceus                | 3           | 0.09          | 0.00        |
|                                    | pemphigus vulgaris                 | 3           | 0.09          | 0.00        |
|                                    | pitted keratolysis                 | 3           | 0.09          | 0.00        |
|                                    | stasis dermatitis                  | 3           | 0.09          | 0.00        |
|                                    | sycosis barbae                     | 3           | 0.09          | 0.00        |
|                                    | tinea cruris                       | 3           | 0.09          | 0.00        |
|                                    | thermal burn                       | 2           | 0.06          | 0.00        |
|                                    | trichostasis spinulosa             | 2           | 0.06          | 0.00        |
|                                    | half and half nail                 | 1           | 0.03          | 0.00        |
|                                    | nevus cell nevus                   | 27          | 0.79          | 7.41        |
| <b>Pigmented lesions benign</b>    | naevus halo                        | 6           | 0.17          | 16.67       |
|                                    | black heel                         | 3           | 0.09          | 0.00        |
|                                    | malignant melanoma                 | 28          | 0.82          | 3.57        |
|                                    | nodular melanoma nm                | 14          | 0.41          | 7.14        |
| <b>Pigmented lesions malignant</b> | superficial spreading melanoma ssm | 5           | 0.15          | 0.00        |
|                                    | lentigo maligna                    | 4           | 0.12          | 0.00        |
|                                    | malignant melanoma metastatic      | 3           | 0.09          | 33.33       |
|                                    | Unknown                            | 840         | 24.48         | 3.57        |
|                                    | <b>All</b>                         | <b>3432</b> | <b>100.00</b> | <b>3.35</b> |

Supplementary Table 5: Frequency Table and False Positive Rates of Diagnoses in the DermIS Repository

Frequency table of diagnoses and False Positive Rates of evaluated skin lesion images in the DermIS repository.

All, Number of all evaluated skin lesion images in the DermIS repository; FPR, False positive rate (%) of the diagnosis in the DermIS repository; n, Number of occurrences of diagnosis; Unknown, Diagnosis unknown or unmapped; %, percentage of diagnosis in relation to all evaluated skin lesion images in the DermIS repository.

| Category                              | Diagnosis                             | n  | %    | FPR   |
|---------------------------------------|---------------------------------------|----|------|-------|
|                                       | hemangioma                            | 40 | 0.61 | 2.50  |
|                                       | dermatofibroma                        | 14 | 0.21 | 14.29 |
|                                       | lymphangioma                          | 14 | 0.21 | 0.00  |
|                                       | pilomatricoma                         | 13 | 0.20 | 15.38 |
|                                       | adenoma sebaceum                      | 11 | 0.17 | 0.00  |
|                                       | glomus tumor                          | 11 | 0.17 | 0.00  |
|                                       | pilar cyst                            | 11 | 0.17 | 9.09  |
|                                       | granuloma pyogenic                    | 10 | 0.15 | 10.00 |
|                                       | telangiectases                        | 10 | 0.15 | 0.00  |
|                                       | becker nevus                          | 8  | 0.12 | 0.00  |
|                                       | neurolemmoma                          | 8  | 0.12 | 0.00  |
|                                       | syringoma                             | 8  | 0.12 | 0.00  |
| Benign dermal tumors cysts<br>sinuses | trichoepithelioma                     | 8  | 0.12 | 0.00  |
|                                       | acrotrichoma                          | 7  | 0.11 | 14.29 |
|                                       | trichoepithelioma papulosum multiplex | 7  | 0.11 | 0.00  |
|                                       | connective tissue nevus               | 6  | 0.09 | 0.00  |
|                                       | cylindroma                            | 6  | 0.09 | 0.00  |
|                                       | hemangioma racemosum                  | 6  | 0.09 | 16.67 |
|                                       | hidrocystoma                          | 6  | 0.09 | 0.00  |
|                                       | angioma serpiginosum                  | 5  | 0.08 | 20.00 |
|                                       | fibroma                               | 5  | 0.08 | 20.00 |
|                                       | aponeurotic fibroma                   | 4  | 0.06 | 0.00  |
|                                       | ectopic respiratory epithelia         | 4  | 0.06 | 0.00  |
|                                       | infantile digital fibromatosis        | 4  | 0.06 | 0.00  |

|                                                             |                                           |    |      |       |
|-------------------------------------------------------------|-------------------------------------------|----|------|-------|
|                                                             | klippel treunaunay syndrome               | 4  | 0.06 | 0.00  |
|                                                             | nevus lipomatosis                         | 4  | 0.06 | 0.00  |
|                                                             | sebaceous hyperplasia                     | 4  | 0.06 | 0.00  |
|                                                             | spider nevus                              | 4  | 0.06 | 25.00 |
|                                                             | spiradenoma                               | 4  | 0.06 | 0.00  |
|                                                             | angiokeratomas                            | 3  | 0.05 | 0.00  |
|                                                             | leiomyoma                                 | 3  | 0.05 | 33.33 |
|                                                             | port wine stain                           | 3  | 0.05 | 0.00  |
|                                                             | pyogenic granuloma                        | 3  | 0.05 | 0.00  |
|                                                             | scrotal cyst                              | 3  | 0.05 | 0.00  |
|                                                             | trichoblastoma                            | 3  | 0.05 | 0.00  |
|                                                             | ganglion                                  | 2  | 0.03 | 0.00  |
|                                                             | mucous cyst                               | 2  | 0.03 | 0.00  |
|                                                             | pilonidal sinus                           | 2  | 0.03 | 0.00  |
|                                                             | vascular anomaly                          | 2  | 0.03 | 0.00  |
|                                                             | cutis marmorata telangiectatica congenita | 1  | 0.02 | 0.00  |
|                                                             | myxoid cyst                               | 1  | 0.02 | 0.00  |
|                                                             | nevus flammeus                            | 1  | 0.02 | 0.00  |
|                                                             | spider angioma                            | 1  | 0.02 | 0.00  |
|                                                             | trichoadenoma                             | 1  | 0.02 | 0.00  |
|                                                             | trichofolliculoma                         | 1  | 0.02 | 0.00  |
|                                                             | venous lake                               | 1  | 0.02 | 0.00  |
| <b>Cutaneous lymphoma and lymphoid infiltrates</b>          | cutaneous t cell lymphoma                 | 88 | 1.34 | 4.55  |
|                                                             | lymphoma b cell                           | 35 | 0.53 | 0.00  |
|                                                             | erythema arciforme et palpabile migrans   | 12 | 0.18 | 8.33  |
|                                                             | lymphomatoid papulosis                    | 10 | 0.15 | 40.00 |
|                                                             | pseudo lymphoma other types               | 7  | 0.11 | 0.00  |
| <b>Epidermal tumors hamartomas milia and growths benign</b> | epidermal nevus                           | 44 | 0.67 | 11.36 |
|                                                             | seborrheic keratosis                      | 33 | 0.50 | 0.00  |
|                                                             | porokeratosis                             | 26 | 0.39 | 0.00  |
|                                                             | acral keratosis                           | 7  | 0.11 | 14.29 |
|                                                             | prurigo nodularis                         | 5  | 0.08 | 80.00 |



|                                                     |                                                 |                               |      |      |       |
|-----------------------------------------------------|-------------------------------------------------|-------------------------------|------|------|-------|
|                                                     | stucco keratosis                                | 5                             | 0.08 | 0.00 |       |
|                                                     | clear cell acanthoma                            | 3                             | 0.05 | 0.00 |       |
|                                                     | giant comedo                                    | 3                             | 0.05 | 0.00 |       |
|                                                     | milium                                          | 3                             | 0.05 | 0.00 |       |
|                                                     | <b>squamous cell carcinoma</b>                  | 78                            | 1.18 | 1.28 |       |
|                                                     | <b>solid cystic basal cell carcinoma</b>        | 63                            | 0.96 | 0.00 |       |
|                                                     | <b>basal cell carcinoma</b>                     | 57                            | 0.87 | 1.75 |       |
|                                                     | <b>bowens disease</b>                           | 47                            | 0.71 | 0.00 |       |
|                                                     | <b>basal cell carcinoma morpheiform</b>         | 46                            | 0.70 | 4.35 |       |
|                                                     | <b>actinic cheilitis</b>                        | 26                            | 0.39 | 0.00 |       |
|                                                     | <b>actinic keratosis</b>                        | 26                            | 0.39 | 3.85 |       |
|                                                     | <b>carcinoma of lip</b>                         | 19                            | 0.29 | 0.00 |       |
|                                                     | <b>basal cell carcinoma ulcerating</b>          | 18                            | 0.27 | 0.00 |       |
|                                                     | <b>keratoacanthoma</b>                          | 15                            | 0.23 | 0.00 |       |
|                                                     | <b>pigmented basal cell carcinoma</b>           | 13                            | 0.20 | 0.00 |       |
| <b>Epidermal tumors pre malignant and malignant</b> | <b>superficial basal cell carcinoma</b>         | 11                            | 0.17 | 0.00 |       |
|                                                     | <b>leucoplakia praecancerosa</b>                | 9                             | 0.14 | 0.00 |       |
|                                                     | <b>ulcus terebrans</b>                          | 8                             | 0.12 | 0.00 |       |
|                                                     | <b>basal cell nevus syndrome</b>                | 6                             | 0.09 | 0.00 |       |
|                                                     | <b>cutaneous horn</b>                           | 4                             | 0.06 | 0.00 |       |
|                                                     | <b>arsenical keratoses</b>                      | 2                             | 0.03 | 0.00 |       |
|                                                     | <b>erythroplasia queyrat</b>                    | 2                             | 0.03 | 0.00 |       |
|                                                     | <b>extramammary paget disease</b>               | 2                             | 0.03 | 0.00 |       |
|                                                     | <b>hypertrophic actinic keratosis</b>           | 2                             | 0.03 | 0.00 |       |
|                                                     | <b>leukoplakia</b>                              | 2                             | 0.03 | 0.00 |       |
|                                                     | <b>pagets disease</b>                           | 2                             | 0.03 | 0.00 |       |
|                                                     | <b>verrucous carcinoma</b>                      | 2                             | 0.03 | 0.00 |       |
|                                                     | <b>basal cell carcinoma nose</b>                | 1                             | 0.02 | 0.00 |       |
|                                                     | <b>Genodermatoses and supernumerary growths</b> | <b>neurofibromatosis</b>      | 40   | 0.61 | 17.50 |
|                                                     |                                                 | <b>dariers disease</b>        | 35   | 0.53 | 0.00  |
|                                                     |                                                 | <b>incontinentia pigmenti</b> | 31   | 0.47 | 9.68  |
| <b>ichthyosis congenita</b>                         |                                                 | 27                            | 0.41 | 3.70 |       |
| <b>erythrokeratoderma variabilis</b>                |                                                 | 23                            | 0.35 | 4.35 |       |

|                                          |                                      |      |       |      |
|------------------------------------------|--------------------------------------|------|-------|------|
| epidermolysis bullosa                    | 19                                   | 0.29 | 5.26  |      |
| rothmund thomson syndrome                | 15                                   | 0.23 | 0.00  |      |
| collodion baby                           | 14                                   | 0.21 | 0.00  |      |
| lipoid proteinosis urbach wiethe disease | 13                                   | 0.20 | 7.69  |      |
| epidermolytic hyperkeratosis             | 12                                   | 0.18 | 0.00  |      |
| x linked ichthyosis                      | 11                                   | 0.17 | 0.00  |      |
| xeroderma pigmentosum                    | 11                                   | 0.17 | 9.09  |      |
| acrodermatitis enteropathica             | 10                                   | 0.15 | 10.00 |      |
| ehlers danlos syndrome                   | 10                                   | 0.15 | 0.00  |      |
| leopard syndrome                         | 10                                   | 0.15 | 10.00 |      |
| pseudoxanthoma elasticum                 | 10                                   | 0.15 | 0.00  |      |
| rendu osler syndrome                     | 9                                    | 0.14 | 33.33 |      |
| vascular tumors and malformations        | 9                                    | 0.14 | 11.11 |      |
| hailey hailey disease                    | 8                                    | 0.12 | 0.00  |      |
| congenital dyskeratosis                  | 7                                    | 0.11 | 0.00  |      |
| congenital ichthyosiform erythroderma    | 6                                    | 0.09 | 0.00  |      |
| congenital erythropoietic porphyria      | 5                                    | 0.08 | 0.00  |      |
| erythrodermia exfoliativa leiner         | 5                                    | 0.08 | 20.00 |      |
| ichthyosis vulgaris                      | 5                                    | 0.08 | 20.00 |      |
| knuckle pads                             | 5                                    | 0.08 | 0.00  |      |
| tuberous sclerosis                       | 5                                    | 0.08 | 20.00 |      |
| acrokeratoelastoidosis                   | 4                                    | 0.06 | 0.00  |      |
| laugier hunziker s syndrome              | 4                                    | 0.06 | 0.00  |      |
| acrokeratosis verruciformis              | 3                                    | 0.05 | 0.00  |      |
| buschke ollendorf syndrome               | 3                                    | 0.05 | 0.00  |      |
| ichthyosis                               | 3                                    | 0.05 | 66.67 |      |
| leprechaunism syndrome                   | 3                                    | 0.05 | 0.00  |      |
| peutz jeghers syndrome                   | 3                                    | 0.05 | 0.00  |      |
| phakomatosis pigmentovascularis          | 3                                    | 0.05 | 0.00  |      |
| supernumerary growths                    | 2                                    | 0.03 | 0.00  |      |
| sjgren larsson syndrome                  | 1                                    | 0.02 | 0.00  |      |
| <hr/>                                    |                                      |      |       |      |
| Inflammatory                             | atopic eczema                        | 141  | 2.14  | 7.09 |
|                                          | pustular skin disease non infectious | 91   | 1.38  | 2.20 |

|                                                                                 |    |      |       |
|---------------------------------------------------------------------------------|----|------|-------|
| <b>lichen planus</b>                                                            | 84 | 1.27 | 9.52  |
| <b>vasculitis</b>                                                               | 80 | 1.21 | 0.00  |
| <b>malformations of extremities</b>                                             | 71 | 1.08 | 4.23  |
| <b>allergic contact dermatitis</b>                                              | 69 | 1.05 | 0.00  |
| <b>bullous pemphigoid</b>                                                       | 67 | 1.02 | 7.46  |
| <b>photodermatoses</b>                                                          | 60 | 0.91 | 3.33  |
| <b>psoriasis vulgaris chronic stationary type</b>                               | 59 | 0.90 | 3.39  |
| <b>sarcoidosis</b>                                                              | 56 | 0.85 | 1.79  |
| <b>toxic epidermal necrolysis and stevens johnson</b>                           | 54 | 0.82 | 5.56  |
| <b>dermatomyositis</b>                                                          | 53 | 0.80 | 0.00  |
| <b>depositional diseases calcinosis cutis amyloid mucinosis gout and others</b> | 50 | 0.76 | 4.00  |
| <b>lichen sclerosus skin</b>                                                    | 50 | 0.76 | 0.00  |
| <b>atrophic skin disease striae and elastic fiber disorders</b>                 | 49 | 0.74 | 4.08  |
| <b>panniculitis lipodystrophy and diseases of subcutis</b>                      | 48 | 0.73 | 8.33  |
| <b>subacute cutaneous lupus erythematosus scler</b>                             | 46 | 0.70 | 0.00  |
| <b>verruca vulgaris</b>                                                         | 45 | 0.68 | 8.89  |
| <b>histiocytic disorders and proliferations</b>                                 | 44 | 0.67 | 15.91 |
| <b>drug eruption</b>                                                            | 43 | 0.65 | 0.00  |
| <b>cheilitis</b>                                                                | 41 | 0.62 | 0.00  |
| <b>granuloma annulare</b>                                                       | 40 | 0.61 | 2.50  |
| <b>mastocytosis</b>                                                             | 40 | 0.61 | 7.50  |
| <b>discoid lupus erythematosus</b>                                              | 39 | 0.59 | 5.13  |
| <b>pemphigus mucosae</b>                                                        | 39 | 0.59 | 0.00  |
| <b>lichen planus of the mucosa</b>                                              | 38 | 0.58 | 0.00  |
| <b>lupus subacute</b>                                                           | 38 | 0.58 | 2.63  |
| <b>pemphigus vulgaris</b>                                                       | 38 | 0.58 | 10.53 |
| <b>psoriasis inversa</b>                                                        | 38 | 0.58 | 0.00  |
| <b>progressive systemic scleroderma</b>                                         | 37 | 0.56 | 5.41  |
| <b>psoriasis vulgaris nail changes</b>                                          | 37 | 0.56 | 0.00  |

|                                                     |    |      |       |
|-----------------------------------------------------|----|------|-------|
| <b>dermatitis herpetiformis</b>                     | 36 | 0.55 | 11.11 |
| <b>herpes zoster</b>                                | 36 | 0.55 | 5.56  |
| <b>syphilis</b>                                     | 36 | 0.55 | 11.11 |
| <b>pigmentation diseases</b>                        | 34 | 0.52 | 5.88  |
| <b>acanthosis nigricans and carp</b>                | 33 | 0.50 | 9.09  |
| <b>hair disorderstrichorrhexis nodosa etc</b>       | 33 | 0.50 | 0.00  |
| <b>scarring alopecia</b>                            | 31 | 0.47 | 0.00  |
| <b>gianotti crosti</b>                              | 29 | 0.44 | 27.59 |
| <b>impetigo</b>                                     | 29 | 0.44 | 10.34 |
| <b>perioral dermatitis</b>                          | 29 | 0.44 | 0.00  |
| <b>scarring</b>                                     | 29 | 0.44 | 6.90  |
| <b>tattoo and foreign body reactions</b>            | 29 | 0.44 | 3.45  |
| <b>tinea corporis</b>                               | 29 | 0.44 | 3.45  |
| <b>livedo reticularis</b>                           | 28 | 0.42 | 3.57  |
| <b>non scarring alopecia</b>                        | 28 | 0.42 | 7.14  |
| <b>radiodermatitis</b>                              | 28 | 0.42 | 3.57  |
| <b>pernio and mimics</b>                            | 27 | 0.41 | 0.00  |
| <b>cutaneous manifestations of systemic disease</b> | 26 | 0.39 | 19.23 |
| <b>lichen planus of the mucosa erosive</b>          | 26 | 0.39 | 0.00  |
| <b>pityriasis rubra pilaris</b>                     | 26 | 0.39 | 0.00  |
| <b>porphyria</b>                                    | 26 | 0.39 | 3.85  |
| <b>rhinophyma</b>                                   | 26 | 0.39 | 0.00  |
| <b>localized scleroderma</b>                        | 25 | 0.38 | 8.00  |
| <b>urticaria</b>                                    | 25 | 0.38 | 4.00  |
| <b>acne cystica</b>                                 | 23 | 0.35 | 17.39 |
| <b>pityriasis versicolor</b>                        | 23 | 0.35 | 4.35  |
| <b>scabies</b>                                      | 23 | 0.35 | 8.70  |
| <b>factitial dermatitis</b>                         | 22 | 0.33 | 13.64 |
| <b>herpes simplex</b>                               | 22 | 0.33 | 13.64 |
| <b>lichen planus exanthematicus</b>                 | 22 | 0.33 | 4.55  |
| <b>varicella</b>                                    | 22 | 0.33 | 4.55  |
| <b>xanthomas</b>                                    | 22 | 0.33 | 9.09  |

|                                                           |    |      |       |
|-----------------------------------------------------------|----|------|-------|
| <b>acne conglobata</b>                                    | 21 | 0.32 | 4.76  |
| <b>erysipelas</b>                                         | 21 | 0.32 | 0.00  |
| <b>gyrate erythemas</b>                                   | 21 | 0.32 | 9.52  |
| <b>pigmented purpuric dermatosis</b>                      | 21 | 0.32 | 4.76  |
| <b>psoriasis vulgaris guttate type</b>                    | 21 | 0.32 | 0.00  |
| <b>molluscum contagiosum</b>                              | 20 | 0.30 | 35.00 |
| <b>pityriasis lichenoides and pleva</b>                   | 20 | 0.30 | 5.00  |
| <b>atypical mycobacterium</b>                             | 19 | 0.29 | 10.53 |
| <b>solar purpura</b>                                      | 19 | 0.29 | 0.00  |
| <b>balanitis</b>                                          | 18 | 0.27 | 0.00  |
| <b>chronic recurrent aphthae</b>                          | 18 | 0.27 | 0.00  |
| <b>fungal infections dermal and subcut</b>                | 18 | 0.27 | 11.11 |
| <b>condyloma acuminata</b>                                | 17 | 0.26 | 0.00  |
| <b>keratosis pilaris and related follicular disorders</b> | 17 | 0.26 | 5.88  |
| <b>cimicosis</b>                                          | 16 | 0.24 | 18.75 |
| <b>erythema multiforme and fixed drug eruptions</b>       | 16 | 0.24 | 0.00  |
| <b>herpes gestationis</b>                                 | 16 | 0.24 | 6.25  |
| <b>lupus vulgaris</b>                                     | 16 | 0.24 | 0.00  |
| <b>necrobiosis lipoidica</b>                              | 16 | 0.24 | 6.25  |
| <b>onychomycosis</b>                                      | 16 | 0.24 | 0.00  |
| <b>lymphedema</b>                                         | 15 | 0.23 | 6.67  |
| <b>nummular eczema</b>                                    | 15 | 0.23 | 13.33 |
| <b>panarteritis nodosa kussmaul maier</b>                 | 15 | 0.23 | 0.00  |
| <b>pemphigus foliaceus</b>                                | 15 | 0.23 | 0.00  |
| <b>scleromyxedema</b>                                     | 15 | 0.23 | 6.67  |
| <b>twenty nail dystrophy</b>                              | 15 | 0.23 | 0.00  |
| <b>morphea linear</b>                                     | 14 | 0.21 | 14.29 |
| <b>pityriasis rosea</b>                                   | 14 | 0.21 | 0.00  |
| <b>raynauds disease</b>                                   | 14 | 0.21 | 0.00  |
| <b>rosacea</b>                                            | 14 | 0.21 | 0.00  |
| <b>furuncle</b>                                           | 13 | 0.20 | 7.69  |
| <b>diseases of bone</b>                                   | 12 | 0.18 | 0.00  |

|                                             |    |      |       |
|---------------------------------------------|----|------|-------|
| geographic tongue                           | 12 | 0.18 | 0.00  |
| nematode infection                          | 12 | 0.18 | 0.00  |
| perforating disorders                       | 12 | 0.18 | 8.33  |
| acne papulopustulosa                        | 11 | 0.17 | 0.00  |
| disseminated lokalized scleroderma          | 11 | 0.17 | 0.00  |
| dry skin eczema                             | 11 | 0.17 | 0.00  |
| eczema herpeticum                           | 11 | 0.17 | 18.18 |
| erythroderma                                | 11 | 0.17 | 0.00  |
| hand foot mouth                             | 11 | 0.17 | 0.00  |
| hypereosinophilic syndrome                  | 11 | 0.17 | 18.18 |
| lichen                                      | 11 | 0.17 | 9.09  |
| metabolic and nutritional diseases          | 11 | 0.17 | 0.00  |
| thermal burn                                | 11 | 0.17 | 0.00  |
| acne inversa                                | 10 | 0.15 | 10.00 |
| acne vulgaris                               | 10 | 0.15 | 10.00 |
| benign mucosal pemphigoid                   | 10 | 0.15 | 0.00  |
| caterpillar dermatitis                      | 10 | 0.15 | 10.00 |
| chronic venous insufficiency grade ii       | 10 | 0.15 | 0.00  |
| erythema elevatum diutinum                  | 10 | 0.15 | 30.00 |
| erythema infectiosum                        | 10 | 0.15 | 0.00  |
| tinea pedis                                 | 10 | 0.15 | 0.00  |
| angiolymphoid hyperplasia with eosinophilia | 9  | 0.14 | 11.11 |
| diabetic gangrene                           | 9  | 0.14 | 0.00  |
| diseases of the ear                         | 9  | 0.14 | 11.11 |
| epidermolysis bullosa acquisita             | 9  | 0.14 | 11.11 |
| erysipelas bullosum                         | 9  | 0.14 | 0.00  |
| herpes simplex genitalis                    | 9  | 0.14 | 22.22 |
| lichen nitidus                              | 9  | 0.14 | 22.22 |
| lichen planus verrucosus                    | 9  | 0.14 | 0.00  |
| neurotic excoriations                       | 9  | 0.14 | 0.00  |
| reiters disease                             | 9  | 0.14 | 11.11 |
| tinea capitis                               | 9  | 0.14 | 11.11 |

|                                                     |   |      |       |
|-----------------------------------------------------|---|------|-------|
| <b>behcets disease</b>                              | 8 | 0.12 | 0.00  |
| <b>hecks disease</b>                                | 8 | 0.12 | 0.00  |
| <b>hidradenitis</b>                                 | 8 | 0.12 | 0.00  |
| <b>hidroa vacciniforme</b>                          | 8 | 0.12 | 0.00  |
| <b>ingrown nail</b>                                 | 8 | 0.12 | 0.00  |
| <b>lupus erythematosus tumidus</b>                  | 8 | 0.12 | 0.00  |
| <b>morphea</b>                                      | 8 | 0.12 | 0.00  |
| <b>morsicatio buccarum</b>                          | 8 | 0.12 | 0.00  |
| <b>neurotrophic ulcer</b>                           | 8 | 0.12 | 0.00  |
| <b>pemphigus seborrhoicus</b>                       | 8 | 0.12 | 0.00  |
| <b>seborrheic dermatitis</b>                        | 8 | 0.12 | 0.00  |
| <b>thrombangiitis obliterans</b>                    | 8 | 0.12 | 0.00  |
| <b>urticarial vasculitis</b>                        | 8 | 0.12 | 0.00  |
| <b>virus exanthem</b>                               | 8 | 0.12 | 0.00  |
| <b>acne fulminans</b>                               | 7 | 0.11 | 0.00  |
| <b>candidiasis mouth</b>                            | 7 | 0.11 | 0.00  |
| <b>crest syndrome</b>                               | 7 | 0.11 | 0.00  |
| <b>dyshidrotic eczema</b>                           | 7 | 0.11 | 28.57 |
| <b>eosinophilic ulcer of the tongue</b>             | 7 | 0.11 | 0.00  |
| <b>erythema ab igne</b>                             | 7 | 0.11 | 0.00  |
| <b>gloves and socks syndrome</b>                    | 7 | 0.11 | 0.00  |
| <b>hyperkeratotic fissured hand and foot eczema</b> | 7 | 0.11 | 0.00  |
| <b>insect bite</b>                                  | 7 | 0.11 | 14.29 |
| <b>lichen planus annularis</b>                      | 7 | 0.11 | 14.29 |
| <b>lupus erythematosus mucosae oris</b>             | 7 | 0.11 | 0.00  |
| <b>measles</b>                                      | 7 | 0.11 | 14.29 |
| <b>psoriasis palmoplantaris</b>                     | 7 | 0.11 | 0.00  |
| <b>purpura</b>                                      | 7 | 0.11 | 0.00  |
| <b>solar damage atrophy</b>                         | 7 | 0.11 | 0.00  |
| <b>staphylococcal scalded skin syndrome</b>         | 7 | 0.11 | 0.00  |
| <b>ulcus cruris venosum</b>                         | 7 | 0.11 | 0.00  |
| <b>varicosis</b>                                    | 7 | 0.11 | 14.29 |

|                                                 |   |      |       |
|-------------------------------------------------|---|------|-------|
| <b>acroangiodermatitis</b>                      | 6 | 0.09 | 16.67 |
| <b>ashy dermatosis</b>                          | 6 | 0.09 | 0.00  |
| <b>atopic eczema of the hands</b>               | 6 | 0.09 | 0.00  |
| <b>decubitus ulcer</b>                          | 6 | 0.09 | 16.67 |
| <b>degos disease</b>                            | 6 | 0.09 | 0.00  |
| <b>diaper dermatitis</b>                        | 6 | 0.09 | 0.00  |
| <b>eczema anal</b>                              | 6 | 0.09 | 0.00  |
| <b>granuloma</b>                                | 6 | 0.09 | 0.00  |
| <b>lupus miliaris disseminatus faciei</b>       | 6 | 0.09 | 16.67 |
| <b>miliaria</b>                                 | 6 | 0.09 | 0.00  |
| <b>pachyonychia congenita hereditaria</b>       | 6 | 0.09 | 0.00  |
| <b>papulose bowenoide</b>                       | 6 | 0.09 | 0.00  |
| <b>parapsoriasis en plaques</b>                 | 6 | 0.09 | 0.00  |
| <b>psoriasis arthropathica</b>                  | 6 | 0.09 | 0.00  |
| <b>psoriasis hand</b>                           | 6 | 0.09 | 0.00  |
| <b>acne comedonica</b>                          | 5 | 0.08 | 0.00  |
| <b>autoerythrocyte sensitization</b>            | 5 | 0.08 | 20.00 |
| <b>cercaria dermatitis</b>                      | 5 | 0.08 | 20.00 |
| <b>eczema</b>                                   | 5 | 0.08 | 0.00  |
| <b>gingival disease</b>                         | 5 | 0.08 | 0.00  |
| <b>hematogenous allergic contact dermatitis</b> | 5 | 0.08 | 0.00  |
| <b>herpes simplex analis</b>                    | 5 | 0.08 | 0.00  |
| <b>herpes simplex oralis</b>                    | 5 | 0.08 | 20.00 |
| <b>leukoedema oral</b>                          | 5 | 0.08 | 0.00  |
| <b>median nail dystrophy</b>                    | 5 | 0.08 | 0.00  |
| <b>onychodystrophia mediana canaliformis</b>    | 5 | 0.08 | 0.00  |
| <b>onychogryphosis</b>                          | 5 | 0.08 | 0.00  |
| <b>poikiloderma civatte</b>                     | 5 | 0.08 | 0.00  |
| <b>psoriatic erythroderma</b>                   | 5 | 0.08 | 0.00  |
| <b>scrophuloderma</b>                           | 5 | 0.08 | 20.00 |
| <b>solar elastosis</b>                          | 5 | 0.08 | 0.00  |
| <b>stasis dermatitis</b>                        | 5 | 0.08 | 0.00  |



|                                                     |   |      |      |
|-----------------------------------------------------|---|------|------|
| <b>tuberculosis</b>                                 | 5 | 0.08 | 0.00 |
| <b>ulcus cruris mixtum</b>                          | 5 | 0.08 | 0.00 |
| <b>zoster gangraenosus</b>                          | 5 | 0.08 | 0.00 |
| <b>acanthoma fissuratum</b>                         | 4 | 0.06 | 0.00 |
| <b>alopecia</b>                                     | 4 | 0.06 | 0.00 |
| <b>angioedema</b>                                   | 4 | 0.06 | 0.00 |
| <b>chronic cutaneous graft versus host reaction</b> | 4 | 0.06 | 0.00 |
| <b>contact dermatitis</b>                           | 4 | 0.06 | 0.00 |
| <b>culicosis bullosa</b>                            | 4 | 0.06 | 0.00 |
| <b>cutis marmorata</b>                              | 4 | 0.06 | 0.00 |
| <b>ecthyma simplex</b>                              | 4 | 0.06 | 0.00 |
| <b>eosinophilic pustular folliculitis</b>           | 4 | 0.06 | 0.00 |
| <b>erythrasma</b>                                   | 4 | 0.06 | 0.00 |
| <b>half and half nail</b>                           | 4 | 0.06 | 0.00 |
| <b>lichen simplex</b>                               | 4 | 0.06 | 0.00 |
| <b>linear scleroderma</b>                           | 4 | 0.06 | 0.00 |
| <b>lupus acute</b>                                  | 4 | 0.06 | 0.00 |
| <b>myxoedema pretibial</b>                          | 4 | 0.06 | 0.00 |
| <b>primary tufted hairs</b>                         | 4 | 0.06 | 0.00 |
| <b>pyoderma faciale</b>                             | 4 | 0.06 | 0.00 |
| <b>solar damage favre racouchot</b>                 | 4 | 0.06 | 0.00 |
| <b>tinea barbae profunda</b>                        | 4 | 0.06 | 0.00 |
| <b>tinea faciei</b>                                 | 4 | 0.06 | 0.00 |
| <b>verrucae planae juveniles</b>                    | 4 | 0.06 | 0.00 |
| <b>atrophy blanche</b>                              | 3 | 0.05 | 0.00 |
| <b>candidiasis chronic mucocutaneos</b>             | 3 | 0.05 | 0.00 |
| <b>clubbing</b>                                     | 3 | 0.05 | 0.00 |
| <b>cow pox</b>                                      | 3 | 0.05 | 0.00 |
| <b>diseases of the eye</b>                          | 3 | 0.05 | 0.00 |
| <b>eczema hand</b>                                  | 3 | 0.05 | 0.00 |
| <b>folliculitis</b>                                 | 3 | 0.05 | 0.00 |
| <b>gram negative infection of the foot</b>          | 3 | 0.05 | 0.00 |

|                                         |   |      |       |
|-----------------------------------------|---|------|-------|
| <b>hairy tongue</b>                     | 3 | 0.05 | 0.00  |
| <b>herpes simplex labialis</b>          | 3 | 0.05 | 0.00  |
| <b>herpes type primary</b>              | 3 | 0.05 | 33.33 |
| <b>myiasis</b>                          | 3 | 0.05 | 0.00  |
| <b>pemphigus vegetans</b>               | 3 | 0.05 | 0.00  |
| <b>reticular erythematous mucinosis</b> | 3 | 0.05 | 66.67 |
| <b>sjogrens syndrome</b>                | 3 | 0.05 | 0.00  |
| <b>steroid acne</b>                     | 3 | 0.05 | 0.00  |
| <b>tinea capitis superficialis</b>      | 3 | 0.05 | 0.00  |
| <b>ulcer</b>                            | 3 | 0.05 | 0.00  |
| <b>urticaria factitia</b>               | 3 | 0.05 | 0.00  |
| <b>acne excoriee</b>                    | 2 | 0.03 | 0.00  |
| <b>acne neonatorum</b>                  | 2 | 0.03 | 0.00  |
| <b>atopic dermatitis infant phase</b>   | 2 | 0.03 | 0.00  |
| <b>candidiasis</b>                      | 2 | 0.03 | 0.00  |
| <b>eczema fingertips</b>                | 2 | 0.03 | 0.00  |
| <b>erythema craquele</b>                | 2 | 0.03 | 0.00  |
| <b>fox fordyce disease</b>              | 2 | 0.03 | 0.00  |
| <b>gangrene</b>                         | 2 | 0.03 | 0.00  |
| <b>gonorrhea</b>                        | 2 | 0.03 | 50.00 |
| <b>herpetic gingivostomatite</b>        | 2 | 0.03 | 0.00  |
| <b>intertrigo</b>                       | 2 | 0.03 | 0.00  |
| <b>leprosy</b>                          | 2 | 0.03 | 50.00 |
| <b>lichen planopilaris</b>              | 2 | 0.03 | 50.00 |
| <b>lingua plicata</b>                   | 2 | 0.03 | 0.00  |
| <b>metal dermatitis</b>                 | 2 | 0.03 | 0.00  |
| <b>mucous membrane psoriasis</b>        | 2 | 0.03 | 0.00  |
| <b>neurodermatitis</b>                  | 2 | 0.03 | 0.00  |
| <b>onycholysis</b>                      | 2 | 0.03 | 0.00  |
| <b>pediculosis lids</b>                 | 2 | 0.03 | 0.00  |
| <b>psoriasis infants</b>                | 2 | 0.03 | 0.00  |
| <b>purpura fulminans</b>                | 2 | 0.03 | 50.00 |
| <b>relapsing polychondritis</b>         | 2 | 0.03 | 0.00  |

|                                               |   |      |        |
|-----------------------------------------------|---|------|--------|
| <b>scarlet fever</b>                          | 2 | 0.03 | 0.00   |
| <b>solar damage cutis rhomboidalis nuchae</b> | 2 | 0.03 | 0.00   |
| <b>stomatitis</b>                             | 2 | 0.03 | 0.00   |
| <b>sunburn</b>                                | 2 | 0.03 | 0.00   |
| <b>tick bite</b>                              | 2 | 0.03 | 0.00   |
| <b>tinea capitis profunda</b>                 | 2 | 0.03 | 0.00   |
| <b>tinea manus</b>                            | 2 | 0.03 | 0.00   |
| <b>acne infantile</b>                         | 1 | 0.02 | 0.00   |
| <b>acne pustular</b>                          | 1 | 0.02 | 0.00   |
| <b>allergic hand eczema</b>                   | 1 | 0.02 | 0.00   |
| <b>cat pox</b>                                | 1 | 0.02 | 0.00   |
| <b>cellulitis</b>                             | 1 | 0.02 | 0.00   |
| <b>chancroid</b>                              | 1 | 0.02 | 0.00   |
| <b>dermatitis ekzema</b>                      | 1 | 0.02 | 0.00   |
| <b>dermatosis neglecta</b>                    | 1 | 0.02 | 0.00   |
| <b>eczema areola</b>                          | 1 | 0.02 | 0.00   |
| <b>eczema chronic</b>                         | 1 | 0.02 | 0.00   |
| <b>eczema lids</b>                            | 1 | 0.02 | 0.00   |
| <b>eczematid</b>                              | 1 | 0.02 | 0.00   |
| <b>elephantiasis nostras verrucosa</b>        | 1 | 0.02 | 0.00   |
| <b>epidermodysplasia verruciformis</b>        | 1 | 0.02 | 0.00   |
| <b>erysipeloid</b>                            | 1 | 0.02 | 0.00   |
| <b>fourniers gangrene</b>                     | 1 | 0.02 | 100.00 |
| <b>grovers disease</b>                        | 1 | 0.02 | 0.00   |
| <b>herpes cutaneous</b>                       | 1 | 0.02 | 0.00   |
| <b>irritant contact dermatitis</b>            | 1 | 0.02 | 0.00   |
| <b>ischemia</b>                               | 1 | 0.02 | 0.00   |
| <b>kawasaki syndrome</b>                      | 1 | 0.02 | 0.00   |
| <b>koilonychia</b>                            | 1 | 0.02 | 0.00   |
| <b>nail pigmentation</b>                      | 1 | 0.02 | 0.00   |
| <b>nail psoriasis</b>                         | 1 | 0.02 | 0.00   |
| <b>nail trauma</b>                            | 1 | 0.02 | 0.00   |
| <b>onychogryphosis and onychauxis</b>         | 1 | 0.02 | 0.00   |

|                                 |                                           |      |      |        |
|---------------------------------|-------------------------------------------|------|------|--------|
|                                 | paronychia                                | 1    | 0.02 | 0.00   |
|                                 | pemphigus                                 | 1    | 0.02 | 0.00   |
|                                 | peripheral occlusive arterial disease     | 1    | 0.02 | 0.00   |
|                                 | pityrosporum folliculitis                 | 1    | 0.02 | 0.00   |
|                                 | planar warts                              | 1    | 0.02 | 0.00   |
|                                 | polychondritis                            | 1    | 0.02 | 0.00   |
|                                 | primary herpes simplex virus              | 1    | 0.02 | 100.00 |
|                                 | psoriasis                                 | 1    | 0.02 | 0.00   |
|                                 | psoriasis penis                           | 1    | 0.02 | 0.00   |
|                                 | rheumatoid nodule                         | 1    | 0.02 | 100.00 |
|                                 | subacute cutaneous lupus erythematosus    | 1    | 0.02 | 0.00   |
|                                 | tinea faciale                             | 1    | 0.02 | 0.00   |
|                                 | trichomycosis                             | 1    | 0.02 | 0.00   |
| <b>Malignant dermal tumor</b>   | systemic carcinomas                       | 33   | 0.50 | 6.06   |
|                                 | dermatofibrosarcoma protuberans           | 9    | 0.14 | 0.00   |
|                                 | sarcoma                                   | 7    | 0.11 | 0.00   |
|                                 | abrikossofs tumour of skin                | 6    | 0.09 | 16.67  |
|                                 | intermediate or malignant vascular tumors | 6    | 0.09 | 0.00   |
|                                 | merkel cell carcinoma                     | 3    | 0.05 | 0.00   |
| <b>Pigmented lesions benign</b> | nevocytic nevus                           | 55   | 0.83 | 1.82   |
|                                 | nevus pigmentosus et pilosus              | 14   | 0.21 | 0.00   |
|                                 | halo nevus                                | 13   | 0.20 | 23.08  |
|                                 | melanosis neurocutanea                    | 13   | 0.20 | 23.08  |
|                                 | blue nevus                                | 11   | 0.17 | 0.00   |
|                                 | melanonychia striata                      | 10   | 0.15 | 0.00   |
|                                 | nevus spilus                              | 8    | 0.12 | 0.00   |
|                                 | hereditary dysplastic nevus syndrome      | 6    | 0.09 | 16.67  |
|                                 | mucosal lentigines                        | 6    | 0.09 | 0.00   |
|                                 | mongolian spot                            | 5    | 0.08 | 0.00   |
|                                 | spitz nevus                               | 5    | 0.08 | 20.00  |
|                                 | atypical nevi                             | 4    | 0.06 | 0.00   |
| ephelides                       | 4                                         | 0.06 | 0.00 |        |

|                                    |                                           |      |        |       |
|------------------------------------|-------------------------------------------|------|--------|-------|
|                                    | <b>giant melanocytic nevus</b>            | 4    | 0.06   | 25.00 |
|                                    | <b>congenital nevus</b>                   | 3    | 0.05   | 0.00  |
|                                    | <b>black heel</b>                         | 2    | 0.03   | 0.00  |
|                                    | <b>café au lait spot</b>                  | 2    | 0.03   | 0.00  |
|                                    | <b>lentigo senilis</b>                    | 2    | 0.03   | 0.00  |
|                                    | <b>blue nevus ota</b>                     | 1    | 0.02   | 0.00  |
|                                    | <b>melanotic macule</b>                   | 1    | 0.02   | 0.00  |
|                                    | <b>superficial spreading melanoma ssm</b> | 138  | 2.09   | 3.62  |
|                                    | <b>acrolentiginous melanoma alm</b>       | 27   | 0.41   | 0.00  |
|                                    | <b>lentigo maligna</b>                    | 20   | 0.30   | 5.00  |
|                                    | <b>lentigo maligna melanoma</b>           | 16   | 0.24   | 0.00  |
| <b>Pigmented lesions malignant</b> | <b>malignant melanoma metastatic</b>      | 15   | 0.23   | 0.00  |
|                                    | <b>nodular melanoma nm</b>                | 10   | 0.15   | 0.00  |
|                                    | <b>amelanotic malignant melanoma amm</b>  | 7    | 0.11   | 0.00  |
|                                    | <b>malignant melanoma</b>                 | 7    | 0.11   | 14.29 |
|                                    | <b>mucosal melanoma</b>                   | 3    | 0.05   | 0.00  |
|                                    | <b>nail melanoma</b>                      | 3    | 0.05   | 0.00  |
|                                    | <b>Unknown</b>                            | 608  | 9.23   | 5.10  |
|                                    | <b>All</b>                                | 6589 | 100.00 | 4.78  |

Supplementary Table 6: Frequency Table and False Positive Rates of Diagnoses in the DermNet dataset

Frequency table of diagnoses and False Positive Rates of evaluated skin lesion images in the DermNet dataset.

All, Number of all evaluated skin lesion images in the DermNet dataset; FPR, False positive rate (%) of the diagnosis in the DermNet dataset; n, Number of occurrences of diagnosis; Unknown, Diagnosis unknown or unmapped; %, Percentage of diagnosis in relation to all evaluated skin lesion images in the DermNet dataset.

| Category                           | Diagnosis             | n   | %    | FPR   |
|------------------------------------|-----------------------|-----|------|-------|
|                                    | pilar cyst            | 167 | 0.87 | 14.97 |
|                                    | dermatofibroma        | 135 | 0.70 | 5.19  |
|                                    | pyogenic granuloma    | 112 | 0.58 | 6.25  |
|                                    | sebaceous hyperplasia | 107 | 0.55 | 2.80  |
|                                    | mucous cyst           | 103 | 0.53 | 4.85  |
|                                    | skin tag              | 97  | 0.50 | 10.31 |
|                                    | hemangioma            | 75  | 0.39 | 1.33  |
|                                    | venous malformations  | 72  | 0.37 | 2.78  |
|                                    | telangiectases        | 64  | 0.33 | 6.25  |
|                                    | hemangioma infancy    | 57  | 0.30 | 12.28 |
|                                    | syringoma             | 50  | 0.26 | 8.00  |
|                                    | angiokeratomas        | 48  | 0.25 | 12.50 |
| Benign dermal tumors cysts sinuses | venous lake           | 46  | 0.24 | 2.17  |
|                                    | granulation tissue    | 45  | 0.23 | 0.00  |
|                                    | fordyce spots         | 32  | 0.17 | 0.00  |
|                                    | becker nevus          | 29  | 0.15 | 20.69 |
|                                    | cherry angioma        | 28  | 0.15 | 50.00 |
|                                    | lymphangioma          | 24  | 0.12 | 4.17  |
|                                    | cylindroma            | 15  | 0.08 | 26.67 |
|                                    | nevus anemicus        | 14  | 0.07 | 14.29 |
|                                    | spider angioma        | 14  | 0.07 | 0.00  |
|                                    | fibroma               | 11  | 0.06 | 9.09  |
|                                    | hidrocystoma          | 10  | 0.05 | 0.00  |
|                                    | leiomyoma             | 10  | 0.05 | 10.00 |
|                                    | periungual fibroma    | 9   | 0.05 | 0.00  |

|                                                             |                                           |     |      |        |
|-------------------------------------------------------------|-------------------------------------------|-----|------|--------|
|                                                             | vascular anomaly                          | 8   | 0.04 | 0.00   |
|                                                             | trichoepithelioma                         | 6   | 0.03 | 0.00   |
|                                                             | pilomatricoma                             | 5   | 0.03 | 0.00   |
|                                                             | trichofolliculoma                         | 5   | 0.03 | 0.00   |
|                                                             | arteriovenous malformation                | 4   | 0.02 | 0.00   |
|                                                             | connective tissue nevus                   | 3   | 0.02 | 33.33  |
|                                                             | spiradenoma                               | 3   | 0.02 | 0.00   |
|                                                             | endometriosis                             | 2   | 0.01 | 0.00   |
|                                                             | glomus tumor                              | 2   | 0.01 | 100.00 |
|                                                             | cutis marmorata telangiectatica congenita | 1   | 0.01 | 0.00   |
|                                                             | pilonidal sinus                           | 1   | 0.01 | 0.00   |
|                                                             | scrotal cyst                              | 1   | 0.01 | 0.00   |
|                                                             | trichoadenoma                             | 1   | 0.01 | 0.00   |
| <b>Cutaneous lymphoma and lymphoid infiltrates</b>          | cutaneous t cell lymphoma                 | 85  | 0.44 | 11.76  |
|                                                             | lymphoma b cell                           | 4   | 0.02 | 0.00   |
|                                                             | lymphomatoid papulosis                    | 2   | 0.01 | 0.00   |
| <b>Epidermal tumors hamartomas milia and growths benign</b> | seborrheic keratoses ruff                 | 147 | 0.76 | 0.00   |
|                                                             | epidermal nevus                           | 142 | 0.74 | 3.52   |
|                                                             | seborrheic keratoses smooth               | 122 | 0.63 | 0.00   |
|                                                             | seborrheic keratosis irritated            | 110 | 0.57 | 0.91   |
|                                                             | porokeratosis                             | 79  | 0.41 | 0.00   |
|                                                             | prurigo nodularis                         | 48  | 0.25 | 12.50  |
|                                                             | stucco keratoses                          | 48  | 0.25 | 0.00   |
|                                                             | corns                                     | 40  | 0.21 | 5.00   |
|                                                             | milia                                     | 34  | 0.18 | 11.76  |
|                                                             | dermatosis papulosa nigra                 | 8   | 0.04 | 12.50  |
|                                                             | acquired digital fibrokeratoma            | 7   | 0.04 | 42.86  |
|                                                             | stucco keratosis                          | 7   | 0.04 | 0.00   |
|                                                             | leser trelat sign                         | 2   | 0.01 | 0.00   |
|                                                             | seborrheic keratosis                      | 2   | 0.01 | 0.00   |
| <b>Epidermal tumors pre malignant and malignant</b>         | keratoacanthoma                           | 147 | 0.76 | 2.72   |
|                                                             | basal cell carcinoma lesion               | 128 | 0.66 | 2.34   |

|                                         |    |      |       |
|-----------------------------------------|----|------|-------|
| <b>bowens disease</b>                   | 97 | 0.50 | 3.09  |
| <b>basal cell carcinoma</b>             | 79 | 0.41 | 3.80  |
| <b>basal cell carcinoma nose</b>        | 65 | 0.34 | 6.15  |
| <b>actinic cheilitis</b>                | 61 | 0.32 | 0.00  |
| <b>actinic keratosis face</b>           | 60 | 0.31 | 0.00  |
| <b>actinic keratosis fu</b>             | 59 | 0.31 | 0.00  |
| <b>basal cell carcinoma superficial</b> | 59 | 0.31 | 0.00  |
| <b>actinic keratosis lesion</b>         | 50 | 0.26 | 0.00  |
| <b>basal cell carcinoma face</b>        | 44 | 0.23 | 4.55  |
| <b>basal cell carcinoma lid</b>         | 38 | 0.20 | 0.00  |
| <b>actinic keratosis hand</b>           | 37 | 0.19 | 0.00  |
| <b>basal cell carcinoma ear</b>         | 37 | 0.19 | 0.00  |
| <b>squamous cell carcinoma ear</b>      | 37 | 0.19 | 0.00  |
| <b>basal cell carcinoma lip</b>         | 32 | 0.17 | 3.12  |
| <b>squamous cell carcinoma lesion</b>   | 29 | 0.15 | 3.45  |
| <b>cutaneous horn</b>                   | 26 | 0.13 | 3.85  |
| <b>actinic keratosis horn</b>           | 25 | 0.13 | 0.00  |
| <b>squamous cell carcinoma lip</b>      | 25 | 0.13 | 4.00  |
| <b>basal cell nevus syndrome</b>        | 21 | 0.11 | 14.29 |
| <b>actinic keratosis ear</b>            | 16 | 0.08 | 0.00  |
| <b>arsenical keratoses</b>              | 16 | 0.08 | 6.25  |
| <b>squamous cell carcinoma</b>          | 15 | 0.08 | 6.67  |
| <b>actinic keratosis</b>                | 14 | 0.07 | 0.00  |
| <b>actinic keratosis nose</b>           | 14 | 0.07 | 0.00  |
| <b>basal cell carcinoma scalp</b>       | 14 | 0.07 | 14.29 |
| <b>pagets disease</b>                   | 14 | 0.07 | 7.14  |
| <b>leukoplakia</b>                      | 13 | 0.07 | 0.00  |
| <b>basal cell carcinoma trunk ext</b>   | 12 | 0.06 | 16.67 |
| <b>squamous cell carcinoma hand arm</b> | 12 | 0.06 | 0.00  |
| <b>actinic keratosis pigmented</b>      | 8  | 0.04 | 0.00  |
| <b>extramammary paget disease</b>       | 8  | 0.04 | 12.50 |
| <b>squamous cell carcinoma face</b>     | 7  | 0.04 | 0.00  |
| <b>squamous cell carcinoma nose</b>     | 6  | 0.03 | 0.00  |



|                                                     |                                             |                       |      |       |       |
|-----------------------------------------------------|---------------------------------------------|-----------------------|------|-------|-------|
|                                                     | basal cell carcinoma aldera                 | 5                     | 0.03 | 0.00  |       |
|                                                     | erythroplasia queyrat                       | 5                     | 0.03 | 0.00  |       |
|                                                     | verrucous carcinoma                         | 5                     | 0.03 | 0.00  |       |
|                                                     | keratosis solar                             | 2                     | 0.01 | 0.00  |       |
|                                                     | basal cell carcinoma sclerosing             | 1                     | 0.01 | 0.00  |       |
|                                                     | superficial basal cell carcinoma            | 1                     | 0.01 | 0.00  |       |
|                                                     | neurofibromatosis                           | 88                    | 0.46 | 6.82  |       |
|                                                     | dariers disease                             | 64                    | 0.33 | 3.12  |       |
|                                                     | epidermolysis bullosa                       | 58                    | 0.30 | 15.52 |       |
|                                                     | tuberous sclerosis                          | 56                    | 0.29 | 5.36  |       |
|                                                     | ichthyosis sex linked                       | 44                    | 0.23 | 0.00  |       |
|                                                     | ichthyosis other forms                      | 41                    | 0.21 | 19.51 |       |
|                                                     | ichthyosis dominant                         | 35                    | 0.18 | 0.00  |       |
|                                                     | hailey hailey disease                       | 30                    | 0.16 | 0.00  |       |
|                                                     | supernumerary growths                       | 16                    | 0.08 | 18.75 |       |
|                                                     | birt hogg dube                              | 14                    | 0.07 | 0.00  |       |
| <b>Genodermatoses and<br/>supernumerary growths</b> | lipoid proteinosis urbach wiethe<br>disease | 11                    | 0.06 | 9.09  |       |
|                                                     | albinism                                    | 9                     | 0.05 | 0.00  |       |
|                                                     | congenital anomalies                        | 9                     | 0.05 | 0.00  |       |
|                                                     | cowden disease                              | 8                     | 0.04 | 0.00  |       |
|                                                     | pseudoxanthoma elasticum                    | 8                     | 0.04 | 12.50 |       |
|                                                     | acrodermatitis enteropathica                | 6                     | 0.03 | 0.00  |       |
|                                                     | muir torre syndrome                         | 5                     | 0.03 | 0.00  |       |
|                                                     | erythrokeratoderma variabilis               | 4                     | 0.02 | 0.00  |       |
|                                                     | congenital erythropoietic porphyria         | 3                     | 0.02 | 0.00  |       |
|                                                     | ichthyosis                                  | 2                     | 0.01 | 0.00  |       |
|                                                     | vascular tumors and malformations           | 1                     | 0.01 | 0.00  |       |
|                                                     | <b>Inflammatory</b>                         | diaper dermatitis     | 266  | 1.38  | 10.53 |
|                                                     |                                             | lichen planus         | 261  | 1.35  | 5.36  |
|                                                     |                                             | molluscum contagiosum | 241  | 1.25  | 25.73 |
| non scarring alopecia                               |                                             | 213                   | 1.10 | 8.45  |       |
| lichen sclerosus skin                               |                                             | 205                   | 1.06 | 10.73 |       |

|                                                     |     |      |       |
|-----------------------------------------------------|-----|------|-------|
| <b>erythema multiforme and fixed drug eruptions</b> | 199 | 1.03 | 8.04  |
| <b>photodermatoses</b>                              | 160 | 0.83 | 4.38  |
| <b>onychomycosis</b>                                | 158 | 0.82 | 0.63  |
| <b>genital warts</b>                                | 153 | 0.79 | 14.38 |
| <b>herpes type recurrent</b>                        | 148 | 0.77 | 8.78  |
| <b>vasculitis</b>                                   | 146 | 0.76 | 1.37  |
| <b>psoriasis</b>                                    | 144 | 0.75 | 2.78  |
| <b>lichen simplex</b>                               | 142 | 0.74 | 14.08 |
| <b>eczema fingertips</b>                            | 141 | 0.73 | 0.00  |
| <b>lupus chronic cutaneous</b>                      | 141 | 0.73 | 8.51  |
| <b>rosacea</b>                                      | 140 | 0.73 | 3.57  |
| <b>tinea ringworm body</b>                          | 137 | 0.71 | 11.68 |
| <b>atopic dermatitis adult phase</b>                | 136 | 0.71 | 3.68  |
| <b>scabies</b>                                      | 135 | 0.70 | 9.63  |
| <b>psoriasis chronic plaque</b>                     | 134 | 0.69 | 0.75  |
| <b>granuloma annulare</b>                           | 133 | 0.69 | 6.77  |
| <b>herpes zoster</b>                                | 133 | 0.69 | 15.04 |
| <b>herpes type primary</b>                          | 132 | 0.68 | 12.12 |
| <b>seborrheic dermatitis</b>                        | 132 | 0.68 | 9.85  |
| <b>allergic contact dermatitis</b>                  | 131 | 0.68 | 6.11  |
| <b>pityriasis rosea</b>                             | 129 | 0.67 | 2.33  |
| <b>sun damaged skin</b>                             | 129 | 0.67 | 1.55  |
| <b>perioral dermatitis</b>                          | 125 | 0.65 | 4.00  |
| <b>tinea ringworm groin</b>                         | 123 | 0.64 | 40.65 |
| <b>pigmentation diseases</b>                        | 122 | 0.63 | 6.56  |
| <b>drug eruption</b>                                | 119 | 0.62 | 1.68  |
| <b>tinea ringworm versicolor</b>                    | 118 | 0.61 | 8.47  |
| <b>eczema nummular</b>                              | 117 | 0.61 | 2.56  |
| <b>psoriasis palms soles</b>                        | 116 | 0.60 | 3.45  |
| <b>warts common</b>                                 | 116 | 0.60 | 9.48  |
| <b>acne cystic</b>                                  | 114 | 0.59 | 3.51  |
| <b>eczema hand</b>                                  | 114 | 0.59 | 0.00  |

|                                                                                 |     |      |       |
|---------------------------------------------------------------------------------|-----|------|-------|
| <b>psoriasis guttate</b>                                                        | 113 | 0.59 | 7.08  |
| <b>eczema subacute</b>                                                          | 111 | 0.58 | 8.11  |
| <b>stasis dermatitis and ulcers</b>                                             | 111 | 0.58 | 0.00  |
| <b>bullous pemphigoid</b>                                                       | 110 | 0.57 | 7.27  |
| <b>warts plantar</b>                                                            | 109 | 0.57 | 6.42  |
| <b>atopic dermatitis childhood phase</b>                                        | 103 | 0.53 | 6.80  |
| <b>hidradenitis</b>                                                             | 103 | 0.53 | 15.53 |
| <b>eczema foot</b>                                                              | 102 | 0.53 | 0.00  |
| <b>psoriasis scalp</b>                                                          | 102 | 0.53 | 3.92  |
| <b>dermatitis herpetiformis</b>                                                 | 100 | 0.52 | 9.00  |
| <b>dyshidrotic eczema</b>                                                       | 100 | 0.52 | 0.00  |
| <b>herpes cutaneous</b>                                                         | 100 | 0.52 | 10.00 |
| <b>diseases of the ear</b>                                                      | 97  | 0.50 | 0.00  |
| <b>morphea</b>                                                                  | 96  | 0.50 | 6.25  |
| <b>urticaria acute</b>                                                          | 95  | 0.49 | 4.21  |
| <b>biting fleas</b>                                                             | 89  | 0.46 | 15.73 |
| <b>scarring alopecia</b>                                                        | 88  | 0.46 | 13.64 |
| <b>necrobiosis lipoidica</b>                                                    | 85  | 0.44 | 1.18  |
| <b>rhus dermatitis</b>                                                          | 85  | 0.44 | 0.00  |
| <b>atopic dermatitis infant phase</b>                                           | 84  | 0.44 | 14.29 |
| <b>depositional diseases calcinosis cutis amyloid mucinosis gout and others</b> | 84  | 0.44 | 4.76  |
| <b>keratosis pilaris and related follicular disorders</b>                       | 84  | 0.44 | 2.38  |
| <b>paronychia</b>                                                               | 84  | 0.44 | 0.00  |
| <b>xanthomas</b>                                                                | 83  | 0.43 | 13.25 |
| <b>porphyria</b>                                                                | 82  | 0.43 | 8.54  |
| <b>scarring</b>                                                                 | 81  | 0.42 | 8.64  |
| <b>tinea ringworm foot webs</b>                                                 | 80  | 0.41 | 3.75  |
| <b>acne pustular</b>                                                            | 76  | 0.39 | 5.26  |
| <b>impetigo</b>                                                                 | 76  | 0.39 | 5.26  |
| <b>rosacea nose</b>                                                             | 74  | 0.38 | 1.35  |
| <b>virus exanthem</b>                                                           | 74  | 0.38 | 4.05  |
| <b>cheilitis</b>                                                                | 72  | 0.37 | 0.00  |

|                                                     |    |      |       |
|-----------------------------------------------------|----|------|-------|
| <b>pigmented purpuric dermatosis</b>                | 72 | 0.37 | 1.39  |
| <b>pseudomonas</b>                                  | 72 | 0.37 | 4.17  |
| <b>tinea ringworm laboratory</b>                    | 72 | 0.37 | 4.17  |
| <b>acne open comedo</b>                             | 69 | 0.36 | 2.90  |
| <b>intertrigo</b>                                   | 68 | 0.35 | 29.41 |
| <b>pustular skin disease non infectious</b>         | 68 | 0.35 | 5.88  |
| <b>tinea ringworm scalp</b>                         | 68 | 0.35 | 4.41  |
| <b>pityriasis rubra pilaris</b>                     | 67 | 0.35 | 7.46  |
| <b>psoriasis hand</b>                               | 67 | 0.35 | 0.00  |
| <b>tinea ringworm foot dorsum</b>                   | 65 | 0.34 | 0.00  |
| <b>tinea ringworm hand dorsum</b>                   | 65 | 0.34 | 3.08  |
| <b>varicella</b>                                    | 65 | 0.34 | 32.31 |
| <b>cutaneous manifestations of systemic disease</b> | 64 | 0.33 | 14.06 |
| <b>onycholysis</b>                                  | 64 | 0.33 | 0.00  |
| <b>herpes simplex</b>                               | 61 | 0.32 | 11.48 |
| <b>neurotic excoriations</b>                        | 61 | 0.32 | 14.75 |
| <b>warts</b>                                        | 61 | 0.32 | 3.28  |
| <b>eczema herpeticum</b>                            | 60 | 0.31 | 10.00 |
| <b>patch testing</b>                                | 60 | 0.31 | 10.00 |
| <b>grovers disease</b>                              | 59 | 0.31 | 10.17 |
| <b>pemphigus</b>                                    | 59 | 0.31 | 0.00  |
| <b>tick bite</b>                                    | 59 | 0.31 | 6.78  |
| <b>tinea ringworm face</b>                          | 58 | 0.30 | 1.72  |
| <b>acne keloidalis</b>                              | 57 | 0.30 | 42.11 |
| <b>warts digitate</b>                               | 57 | 0.30 | 0.00  |
| <b>dermatomyositis</b>                              | 56 | 0.29 | 5.36  |
| <b>dry skin eczema</b>                              | 56 | 0.29 | 0.00  |
| <b>pediculosis lids</b>                             | 56 | 0.29 | 5.36  |
| <b>tinea ringworm primary lesion</b>                | 56 | 0.29 | 3.57  |
| <b>lupus acute</b>                                  | 55 | 0.29 | 3.64  |
| <b>warts flat</b>                                   | 54 | 0.28 | 1.85  |
| <b>enterovirus</b>                                  | 53 | 0.27 | 15.09 |

|                                                            |    |      |       |
|------------------------------------------------------------|----|------|-------|
| <b>pityriasis lichenoides and pleva</b>                    | 53 | 0.27 | 18.87 |
| <b>tinea ringworm incognito</b>                            | 53 | 0.27 | 11.32 |
| <b>habit tic deformity</b>                                 | 51 | 0.26 | 0.00  |
| <b>keratolysis exfoliativa</b>                             | 51 | 0.26 | 0.00  |
| <b>eczema chronic</b>                                      | 50 | 0.26 | 0.00  |
| <b>lichen planus oral</b>                                  | 49 | 0.25 | 2.04  |
| <b>tinea ringworm foot plantar</b>                         | 49 | 0.25 | 0.00  |
| <b>tinea ringworm palm</b>                                 | 48 | 0.25 | 0.00  |
| <b>acne closed comedo</b>                                  | 47 | 0.24 | 0.00  |
| <b>nematode infection</b>                                  | 47 | 0.24 | 10.64 |
| <b>gyrate erythemas</b>                                    | 46 | 0.24 | 6.52  |
| <b>panniculitis lipodystrophy and diseases of subcutis</b> | 45 | 0.23 | 11.11 |
| <b>psoriasis nails</b>                                     | 44 | 0.23 | 0.00  |
| <b>scleroderma</b>                                         | 44 | 0.23 | 4.55  |
| <b>crest syndrome</b>                                      | 43 | 0.22 | 2.33  |
| <b>pitted keratolysis</b>                                  | 42 | 0.22 | 0.00  |
| <b>dermographia</b>                                        | 41 | 0.21 | 2.44  |
| <b>lichen</b>                                              | 41 | 0.21 | 0.00  |
| <b>pernio and mimics</b>                                   | 41 | 0.21 | 4.88  |
| <b>folliculitis</b>                                        | 39 | 0.20 | 20.51 |
| <b>scarlet fever</b>                                       | 39 | 0.20 | 5.13  |
| <b>lichen planus drug</b>                                  | 38 | 0.20 | 2.63  |
| <b>psoriasis inversus</b>                                  | 38 | 0.20 | 18.42 |
| <b>erythema infectiosum</b>                                | 37 | 0.19 | 2.70  |
| <b>warts cryotherapy</b>                                   | 37 | 0.19 | 2.70  |
| <b>erosio interdigitalis blastomycetica</b>                | 36 | 0.19 | 0.00  |
| <b>fungal infections dermal and subcut</b>                 | 36 | 0.19 | 8.33  |
| <b>malformations of extremities</b>                        | 36 | 0.19 | 16.67 |
| <b>erythroderma</b>                                        | 35 | 0.18 | 0.00  |
| <b>spider bite</b>                                         | 35 | 0.18 | 14.29 |
| <b>median nail dystrophy</b>                               | 33 | 0.17 | 0.00  |
| <b>warts periungual</b>                                    | 33 | 0.17 | 0.00  |

|                                             |    |      |       |
|---------------------------------------------|----|------|-------|
| wet to dry foot syndrome                    | 33 | 0.17 | 0.00  |
| ridging beading                             | 32 | 0.17 | 0.00  |
| staphylococcal folliculitis                 | 32 | 0.17 | 37.50 |
| sarcoidosis                                 | 31 | 0.16 | 3.23  |
| eczema leg                                  | 30 | 0.16 | 0.00  |
| hand foot mouth                             | 30 | 0.16 | 33.33 |
| acne excoriee                               | 29 | 0.15 | 17.24 |
| herpes buttocks                             | 29 | 0.15 | 10.34 |
| kawasaki syndrome                           | 29 | 0.15 | 17.24 |
| psoriasis penis                             | 29 | 0.15 | 0.00  |
| beaus lines                                 | 28 | 0.15 | 0.00  |
| diabetic bullae                             | 28 | 0.15 | 3.57  |
| furuncle                                    | 27 | 0.14 | 29.63 |
| myxoedema pretibial                         | 27 | 0.14 | 7.41  |
| pemphigus foliaceus                         | 27 | 0.14 | 0.00  |
| angioedema                                  | 26 | 0.13 | 7.69  |
| atopic dermatitis feet                      | 26 | 0.13 | 0.00  |
| pseudomonas folliculitis                    | 26 | 0.13 | 26.92 |
| terry nails                                 | 26 | 0.13 | 0.00  |
| eczema                                      | 25 | 0.13 | 4.00  |
| hair disorderstrichorrhexis nodosa<br>etc   | 25 | 0.13 | 32.00 |
| henoch schonlein purpura                    | 25 | 0.13 | 12.00 |
| histiocytic disorders and<br>proliferations | 25 | 0.13 | 16.00 |
| eczema arms                                 | 24 | 0.12 | 0.00  |
| ingrown nail                                | 24 | 0.12 | 0.00  |
| erythema ab igne                            | 23 | 0.12 | 0.00  |
| eczema trunk generalized                    | 22 | 0.11 | 4.55  |
| id reaction                                 | 22 | 0.11 | 0.00  |
| psoriasis anus                              | 22 | 0.11 | 22.73 |
| dermatitis swimming                         | 21 | 0.11 | 0.00  |
| reiters disease                             | 21 | 0.11 | 23.81 |
| splinter hemorrhage                         | 21 | 0.11 | 0.00  |

|                                                                 |    |      |       |
|-----------------------------------------------------------------|----|------|-------|
| <b>syphilis</b>                                                 | 21 | 0.11 | 19.05 |
| <b>tinea ringworm beard</b>                                     | 21 | 0.11 | 14.29 |
| <b>interstitial granulomatous dermatitis</b>                    | 20 | 0.10 | 0.00  |
| <b>koilonychia</b>                                              | 20 | 0.10 | 0.00  |
| <b>pincer nails</b>                                             | 20 | 0.10 | 0.00  |
| <b>distal splitting hang nail</b>                               | 19 | 0.10 | 0.00  |
| <b>eczema lids</b>                                              | 19 | 0.10 | 0.00  |
| <b>hypereosinophilic syndrome</b>                               | 19 | 0.10 | 0.00  |
| <b>leprosy</b>                                                  | 19 | 0.10 | 10.53 |
| <b>planar warts</b>                                             | 19 | 0.10 | 0.00  |
| <b>psoriasis treatment</b>                                      | 19 | 0.10 | 0.00  |
| <b>erythrasma</b>                                               | 18 | 0.09 | 50.00 |
| <b>gianotti crosti</b>                                          | 18 | 0.09 | 0.00  |
| <b>pigmented bands</b>                                          | 18 | 0.09 | 11.11 |
| <b>stasis dermatitis</b>                                        | 18 | 0.09 | 0.00  |
| <b>sycosis barbae</b>                                           | 18 | 0.09 | 0.00  |
| <b>acne infantile</b>                                           | 17 | 0.09 | 0.00  |
| <b>atypical mycobacterium</b>                                   | 17 | 0.09 | 52.94 |
| <b>eczema acute</b>                                             | 17 | 0.09 | 0.00  |
| <b>eczema areola</b>                                            | 17 | 0.09 | 0.00  |
| <b>atrophic skin disease striae and elastic fiber disorders</b> | 16 | 0.08 | 18.75 |
| <b>lichen nitidus</b>                                           | 16 | 0.08 | 6.25  |
| <b>rheumatoid nodule</b>                                        | 16 | 0.08 | 37.50 |
| <b>candidiasis mouth</b>                                        | 15 | 0.08 | 0.00  |
| <b>cellulitis</b>                                               | 15 | 0.08 | 13.33 |
| <b>clubbing</b>                                                 | 15 | 0.08 | 0.00  |
| <b>solar damage favre racouchot</b>                             | 15 | 0.08 | 0.00  |
| <b>urticaria vasculitis</b>                                     | 15 | 0.08 | 0.00  |
| <b>cholinergic urticaria</b>                                    | 14 | 0.07 | 0.00  |
| <b>twenty nail dystrophy</b>                                    | 14 | 0.07 | 0.00  |
| <b>acquired autoimmune bullous diseaseherpes gestationis</b>    | 13 | 0.07 | 38.46 |
| <b>fissure</b>                                                  | 13 | 0.07 | 0.00  |

|                                                           |    |      |       |
|-----------------------------------------------------------|----|------|-------|
| <b>lichen planus hypertrophic</b>                         | 13 | 0.07 | 7.69  |
| <b>lichen planus vaginal</b>                              | 13 | 0.07 | 7.69  |
| <b>lupus subacute</b>                                     | 13 | 0.07 | 7.69  |
| <b>maceration</b>                                         | 13 | 0.07 | 0.00  |
| <b>metal dermatitis</b>                                   | 13 | 0.07 | 15.38 |
| <b>perforating disorders</b>                              | 13 | 0.07 | 0.00  |
| <b>psoriasis light sensitive</b>                          | 13 | 0.07 | 0.00  |
| <b>warts mouth</b>                                        | 13 | 0.07 | 0.00  |
| <b>acne scar</b>                                          | 12 | 0.06 | 0.00  |
| <b>atopic dermatitis hyperlinear creases</b>              | 12 | 0.06 | 0.00  |
| <b>cercaria dermatitis</b>                                | 12 | 0.06 | 0.00  |
| <b>metabolic and nutritional diseases</b>                 | 12 | 0.06 | 8.33  |
| <b>shoe allergy</b>                                       | 12 | 0.06 | 0.00  |
| <b>warts immunocompromised</b>                            | 12 | 0.06 | 0.00  |
| <b>ant bite</b>                                           | 11 | 0.06 | 36.36 |
| <b>caterpillar dermatitis</b>                             | 11 | 0.06 | 18.18 |
| <b>erysipelas</b>                                         | 11 | 0.06 | 18.18 |
| <b>gonorrhea</b>                                          | 11 | 0.06 | 9.09  |
| <b>livedo reticularis</b>                                 | 11 | 0.06 | 0.00  |
| <b>mastocytosis</b>                                       | 11 | 0.06 | 9.09  |
| <b>myiasis</b>                                            | 11 | 0.06 | 36.36 |
| <b>onychogryphosis</b>                                    | 11 | 0.06 | 0.00  |
| <b>contact dermatitis</b>                                 | 10 | 0.05 | 10.00 |
| <b>eczema vulva</b>                                       | 10 | 0.05 | 0.00  |
| <b>factitial dermatitis</b>                               | 10 | 0.05 | 0.00  |
| <b>toxic epidermal necrolysis and<br/>stevens johnson</b> | 10 | 0.05 | 30.00 |
| <b>acanthosis nigricans and carp</b>                      | 9  | 0.05 | 0.00  |
| <b>atopic dermatitis</b>                                  | 9  | 0.05 | 0.00  |
| <b>axillary granular parakeratosis</b>                    | 9  | 0.05 | 0.00  |
| <b>eczema ears</b>                                        | 9  | 0.05 | 0.00  |
| <b>eczema face</b>                                        | 9  | 0.05 | 0.00  |
| <b>irritant contact dermatitis</b>                        | 9  | 0.05 | 0.00  |



|                                   |   |      |       |
|-----------------------------------|---|------|-------|
| <b>lichen planus penis</b>        | 9 | 0.05 | 0.00  |
| <b>localized pemphigoid</b>       | 9 | 0.05 | 33.33 |
| <b>pityrosporum folliculitis</b>  | 9 | 0.05 | 0.00  |
| <b>poikiloderma civatte</b>       | 9 | 0.05 | 11.11 |
| <b>tinea versicolor</b>           | 9 | 0.05 | 0.00  |
| <b>trichomycosis</b>              | 9 | 0.05 | 33.33 |
| <b>cat scratch disease</b>        | 8 | 0.04 | 37.50 |
| <b>cimicosis</b>                  | 8 | 0.04 | 12.50 |
| <b>cryoglobulinemia</b>           | 8 | 0.04 | 0.00  |
| <b>eczema impetiginized</b>       | 8 | 0.04 | 0.00  |
| <b>heels dry cracked</b>          | 8 | 0.04 | 12.50 |
| <b>hidroa vacciniforme</b>        | 8 | 0.04 | 25.00 |
| <b>leukonychia</b>                | 8 | 0.04 | 0.00  |
| <b>lymphedema</b>                 | 8 | 0.04 | 12.50 |
| <b>meningococemia</b>             | 8 | 0.04 | 0.00  |
| <b>pachyonychia congenita</b>     | 8 | 0.04 | 0.00  |
| <b>papulose bowenoide</b>         | 8 | 0.04 | 0.00  |
| <b>sunburn</b>                    | 8 | 0.04 | 37.50 |
| <b>dry nails</b>                  | 7 | 0.04 | 0.00  |
| <b>herpes immunocompromised</b>   | 7 | 0.04 | 0.00  |
| <b>hyperhidrosis</b>              | 7 | 0.04 | 0.00  |
| <b>lichen planus palm soles</b>   | 7 | 0.04 | 0.00  |
| <b>radiodermatitis</b>            | 7 | 0.04 | 28.57 |
| <b>acne cystica</b>               | 6 | 0.03 | 0.00  |
| <b>atrophy blanche</b>            | 6 | 0.03 | 16.67 |
| <b>chancroid</b>                  | 6 | 0.03 | 0.00  |
| <b>cosmetic fragrance allergy</b> | 6 | 0.03 | 0.00  |
| <b>degos disease</b>              | 6 | 0.03 | 50.00 |
| <b>erythromelalgia</b>            | 6 | 0.03 | 0.00  |
| <b>nummular eczema</b>            | 6 | 0.03 | 16.67 |
| <b>psoriasis digits</b>           | 6 | 0.03 | 16.67 |
| <b>psoriasis infants</b>          | 6 | 0.03 | 0.00  |
| <b>roseola infantum</b>           | 6 | 0.03 | 0.00  |

|                                             |   |      |       |
|---------------------------------------------|---|------|-------|
| <b>scleromyxedema</b>                       | 6 | 0.03 | 0.00  |
| <b>tinea incognito</b>                      | 6 | 0.03 | 0.00  |
| <b>urticaria</b>                            | 6 | 0.03 | 0.00  |
| <b>acute eczema</b>                         | 5 | 0.03 | 0.00  |
| <b>ashy dermatosis</b>                      | 5 | 0.03 | 0.00  |
| <b>diseases of bone</b>                     | 5 | 0.03 | 0.00  |
| <b>erysipeloid</b>                          | 5 | 0.03 | 0.00  |
| <b>orf</b>                                  | 5 | 0.03 | 40.00 |
| <b>parasitosis psychogenic</b>              | 5 | 0.03 | 20.00 |
| <b>phlebitis superficial</b>                | 5 | 0.03 | 0.00  |
| <b>raynauds disease</b>                     | 5 | 0.03 | 0.00  |
| <b>scalp psoriasis</b>                      | 5 | 0.03 | 0.00  |
| <b>steroid acne</b>                         | 5 | 0.03 | 0.00  |
| <b>tinea ringworm border</b>                | 5 | 0.03 | 0.00  |
| <b>balanitis bacterial</b>                  | 4 | 0.02 | 0.00  |
| <b>blue nails minocycline</b>               | 4 | 0.02 | 0.00  |
| <b>candidiasis chronic mucocutaneos</b>     | 4 | 0.02 | 25.00 |
| <b>desquamation</b>                         | 4 | 0.02 | 0.00  |
| <b>infected eczema</b>                      | 4 | 0.02 | 0.00  |
| <b>lichen planopilaris</b>                  | 4 | 0.02 | 0.00  |
| <b>lichen striatus</b>                      | 4 | 0.02 | 0.00  |
| <b>natural rubber latex allergy</b>         | 4 | 0.02 | 0.00  |
| <b>notalgia paraesthetica</b>               | 4 | 0.02 | 0.00  |
| <b>psoriasis hiv</b>                        | 4 | 0.02 | 25.00 |
| <b>relapsing polychondritis</b>             | 4 | 0.02 | 25.00 |
| <b>rocky mountain spotted fever</b>         | 4 | 0.02 | 25.00 |
| <b>rosacea steroid</b>                      | 4 | 0.02 | 0.00  |
| <b>small pox</b>                            | 4 | 0.02 | 25.00 |
| <b>staphylococcal scalded skin syndrome</b> | 4 | 0.02 | 25.00 |
| <b>streptococci anal penis</b>              | 4 | 0.02 | 25.00 |
| <b>wart</b>                                 | 4 | 0.02 | 0.00  |
| <b>acne vulgaris</b>                        | 3 | 0.02 | 33.33 |

|                                                 |   |      |        |
|-------------------------------------------------|---|------|--------|
| <b>alopecia</b>                                 | 3 | 0.02 | 0.00   |
| <b>bacterial infections</b>                     | 3 | 0.02 | 33.33  |
| <b>epidermodysplasia verruciformis</b>          | 3 | 0.02 | 0.00   |
| <b>fibromatosis</b>                             | 3 | 0.02 | 0.00   |
| <b>hematogenous allergic contact dermatitis</b> | 3 | 0.02 | 33.33  |
| <b>pemphigus foliaceus</b>                      | 3 | 0.02 | 0.00   |
| <b>purpura fulminans</b>                        | 3 | 0.02 | 0.00   |
| <b>tinea pedis</b>                              | 3 | 0.02 | 0.00   |
| <b>tinea ringworm nigra</b>                     | 3 | 0.02 | 0.00   |
| <b>ulcer</b>                                    | 3 | 0.02 | 0.00   |
| <b>urticarial vasculitis</b>                    | 3 | 0.02 | 0.00   |
| <b>warts oral</b>                               | 3 | 0.02 | 0.00   |
| <b>acne rosacea</b>                             | 2 | 0.01 | 0.00   |
| <b>allergic hand eczema</b>                     | 2 | 0.01 | 0.00   |
| <b>ecthyma simplex</b>                          | 2 | 0.01 | 0.00   |
| <b>eczema anal</b>                              | 2 | 0.01 | 100.00 |
|                                                 |   |      | 0      |
| <b>eczema scrotum</b>                           | 2 | 0.01 | 0.00   |
| <b>erythema elevatum diutinum</b>               | 2 | 0.01 | 0.00   |
| <b>granuloma</b>                                | 2 | 0.01 | 0.00   |
| <b>granuloma multiforme</b>                     | 2 | 0.01 | 0.00   |
| <b>herpes gestationis</b>                       | 2 | 0.01 | 50.00  |
| <b>herpes simplex genitalis</b>                 | 2 | 0.01 | 0.00   |
| <b>herpes simplex oralis</b>                    | 2 | 0.01 | 0.00   |
| <b>insect bite</b>                              | 2 | 0.01 | 50.00  |
| <b>lupus vulgaris</b>                           | 2 | 0.01 | 0.00   |
| <b>measles</b>                                  | 2 | 0.01 | 0.00   |
| <b>nail diseases</b>                            | 2 | 0.01 | 0.00   |
| <b>panarteritis nodosa kussmaul maier</b>       | 2 | 0.01 | 0.00   |
| <b>pomade acne</b>                              | 2 | 0.01 | 0.00   |
| <b>psoriatic erythroderma</b>                   | 2 | 0.01 | 0.00   |
| <b>behcets disease</b>                          | 1 | 0.01 | 0.00   |

|                               |                                                  |    |      |            |
|-------------------------------|--------------------------------------------------|----|------|------------|
|                               | <b>candidiasis</b>                               | 1  | 0.01 | 100.0<br>0 |
|                               | <b>chronic bullous disease of childhood</b>      | 1  | 0.01 | 0.00       |
|                               | <b>condyloma acuminata</b>                       | 1  | 0.01 | 0.00       |
|                               | <b>contact dermatitis leg ulcers</b>             | 1  | 0.01 | 0.00       |
|                               | <b>disseminated lokalized scleroderma</b>        | 1  | 0.01 | 0.00       |
|                               | <b>eosinophilic ulcer of the tongue</b>          | 1  | 0.01 | 0.00       |
|                               | <b>erythema craquele</b>                         | 1  | 0.01 | 0.00       |
|                               | <b>gingival disease</b>                          | 1  | 0.01 | 100.0<br>0 |
|                               | <b>guttate psoriasis</b>                         | 1  | 0.01 | 0.00       |
|                               | <b>malassezia folliculitis</b>                   | 1  | 0.01 | 100.0<br>0 |
|                               | <b>miliaria</b>                                  | 1  | 0.01 | 0.00       |
|                               | <b>nail dystrophy</b>                            | 1  | 0.01 | 0.00       |
|                               | <b>nail psoriasis</b>                            | 1  | 0.01 | 0.00       |
|                               | <b>nail shedding</b>                             | 1  | 0.01 | 0.00       |
|                               | <b>nodulo cystic acne vulgaris</b>               | 1  | 0.01 | 0.00       |
|                               | <b>primary herpes simplex virus</b>              | 1  | 0.01 | 0.00       |
|                               | <b>psoriasis inversa</b>                         | 1  | 0.01 | 0.00       |
|                               | <b>psoriasis nail psoriasis</b>                  | 1  | 0.01 | 0.00       |
|                               | <b>psoriasis vulgaris guttate type</b>           | 1  | 0.01 | 0.00       |
|                               | <b>purpura</b>                                   | 1  | 0.01 | 0.00       |
|                               | <b>reticular erythematous mucinosis</b>          | 1  | 0.01 | 0.00       |
|                               | <b>solar elastosis</b>                           | 1  | 0.01 | 0.00       |
|                               | <b>solar purpura</b>                             | 1  | 0.01 | 0.00       |
|                               | <b>stasis edema</b>                              | 1  | 0.01 | 0.00       |
|                               | <b>stasis ulcer</b>                              | 1  | 0.01 | 0.00       |
|                               | <b>thermal burn</b>                              | 1  | 0.01 | 0.00       |
|                               | <b>tinea faciei</b>                              | 1  | 0.01 | 0.00       |
|                               | <b>torus palantine</b>                           | 1  | 0.01 | 0.00       |
|                               | <b>verrucae planae juveniles</b>                 | 1  | 0.01 | 0.00       |
| <b>Malignant dermal tumor</b> | <b>intermediate or malignant vascular tumors</b> | 37 | 0.19 | 5.41       |
|                               | <b>systemic carcinomas</b>                       | 28 | 0.15 | 10.71      |

|                                    |                                        |       |        |       |
|------------------------------------|----------------------------------------|-------|--------|-------|
|                                    | <b>merkel cell carcinoma</b>           | 4     | 0.02   | 0.00  |
|                                    | <b>sarcoma</b>                         | 4     | 0.02   | 25.00 |
|                                    | <b>dermatofibrosarcoma protuberans</b> | 2     | 0.01   | 0.00  |
|                                    | <b>atypical nevi</b>                   | 118   | 0.61   | 1.69  |
|                                    | <b>melanocytic nevi</b>                | 97    | 0.50   | 0.00  |
|                                    | <b>solar lentigo</b>                   | 80    | 0.41   | 1.25  |
|                                    | <b>congenital nevus</b>                | 53    | 0.27   | 5.66  |
|                                    | <b>nevus spilus</b>                    | 34    | 0.18   | 2.94  |
|                                    | <b>halo nevus</b>                      | 30    | 0.16   | 10.00 |
|                                    | <b>melanoma mimic</b>                  | 26    | 0.13   | 0.00  |
| <b>Pigmented lesions benign</b>    | <b>black heel</b>                      | 17    | 0.09   | 0.00  |
|                                    | <b>blue nevus</b>                      | 14    | 0.07   | 0.00  |
|                                    | <b>melanotic macule</b>                | 10    | 0.05   | 0.00  |
|                                    | <b>blue nevus ota</b>                  | 9     | 0.05   | 11.11 |
|                                    | <b>mongolian spot</b>                  | 8     | 0.04   | 25.00 |
|                                    | <b>spitz nevus</b>                     | 7     | 0.04   | 0.00  |
|                                    | <b>café au lait spot</b>               | 3     | 0.02   | 33.33 |
|                                    | <b>nevus repigmented</b>               | 3     | 0.02   | 0.00  |
|                                    | <b>lentigo simplex</b>                 | 1     | 0.01   | 0.00  |
|                                    | <b>malignant melanoma</b>              | 130   | 0.67   | 1.54  |
| <b>Pigmented lesions malignant</b> | <b>lentigo maligna</b>                 | 26    | 0.13   | 0.00  |
|                                    | <b>nail melanoma</b>                   | 5     | 0.03   | 0.00  |
|                                    | <b>lentigo maligna melanoma</b>        | 3     | 0.02   | 0.00  |
|                                    | <b>Unknown</b>                         | 359   | 1.86   | 11.42 |
|                                    | <b>All</b>                             | 19289 | 100.00 | 6.86  |

Supplementary Table 7: Frequency Table of Diagnoses in the DermNet NZ Repository

Frequency table of diagnoses of evaluated skin lesion images in the DermNet NZ repository. False Positive Rates are not reported because this dataset has been used for training and is not part of testing cohort.

All, Number of all evaluated skin lesion images in the DermNet NZ repository; n, Number of occurrences of diagnosis; Unknown, Diagnosis unknown or unmapped; %, percentage of diagnosis in relation to all evaluated skin lesion images in the DermNet NZ repository.

| Category                           | Diagnosis                                 | n  | %    |
|------------------------------------|-------------------------------------------|----|------|
|                                    | angiokeratomas                            | 59 | 0.49 |
|                                    | telangiectases                            | 37 | 0.31 |
|                                    | becker nevus                              | 24 | 0.20 |
|                                    | skin tag                                  | 24 | 0.20 |
|                                    | myxoid cyst                               | 21 | 0.17 |
|                                    | dermatofibroma                            | 19 | 0.16 |
|                                    | spider nevus                              | 14 | 0.12 |
|                                    | cutis marmorata telangiectatica congenita | 13 | 0.11 |
|                                    | pyogenic granuloma                        | 13 | 0.11 |
|                                    | cherry angioma                            | 12 | 0.10 |
|                                    | venous lake                               | 9  | 0.07 |
| Benign dermal tumors cysts sinuses | nevus anemicus                            | 7  | 0.06 |
|                                    | periungual fibroma                        | 6  | 0.05 |
|                                    | port wine stain                           | 6  | 0.05 |
|                                    | steatocystoma multiplex                   | 6  | 0.05 |
|                                    | connective tissue nevus                   | 5  | 0.04 |
|                                    | eccrine poroma                            | 5  | 0.04 |
|                                    | pilomatricoma                             | 5  | 0.04 |
|                                    | angioma serpiginosum                      | 4  | 0.03 |
|                                    | glomus tumor                              | 4  | 0.03 |
|                                    | hidrocystoma                              | 4  | 0.03 |
|                                    | lymphangioma                              | 4  | 0.03 |
|                                    | syringoma                                 | 4  | 0.03 |

|                                                             |                                         |      |      |
|-------------------------------------------------------------|-----------------------------------------|------|------|
|                                                             | trichoepithelioma                       | 4    | 0.03 |
|                                                             | dermoid cyst                            | 3    | 0.02 |
|                                                             | eruptive vellus hair cysts              | 3    | 0.02 |
|                                                             | sebaceous hyperplasia                   | 3    | 0.02 |
|                                                             | leiomyoma                               | 2    | 0.02 |
|                                                             | lymphatic malformations                 | 2    | 0.02 |
|                                                             | pilar cyst                              | 2    | 0.02 |
|                                                             | pilonidal sinus                         | 2    | 0.02 |
|                                                             | klippel treunaunay syndrome             | 1    | 0.01 |
| <b>Cutaneous lymphoma and lymphoid infiltrates</b>          | cutaneous t cell lymphoma               | 49   | 0.41 |
|                                                             | lymphoma b cell                         | 25   | 0.21 |
|                                                             | erythema arciforme et palpabile migrans | 16   | 0.13 |
|                                                             | lymphomatoid papulosis                  | 9    | 0.07 |
| <b>Epidermal tumors hamartomas milia and growths benign</b> | prurigo nodularis                       | 46   | 0.38 |
|                                                             | seborrheic keratosis                    | 37   | 0.31 |
|                                                             | milia                                   | 21   | 0.17 |
|                                                             | epidermal nevus                         | 16   | 0.13 |
|                                                             | corns                                   | 13   | 0.11 |
|                                                             | porokeratosis                           | 9    | 0.07 |
|                                                             | dermatosis papulosa nigra               | 7    | 0.06 |
|                                                             | callus                                  | 5    | 0.04 |
|                                                             | clear cell acanthoma                    | 4    | 0.03 |
|                                                             | stucco keratosis                        | 1    | 0.01 |
| <b>Epidermal tumors pre malignant and malignant</b>         | basal cell carcinoma                    | 234  | 1.94 |
|                                                             | actinic keratosis                       | 173  | 1.44 |
|                                                             | squamous cell carcinoma                 | 82   | 0.68 |
|                                                             | bowens disease                          | 55   | 0.46 |
|                                                             | keratoacanthoma                         | 52   | 0.43 |
|                                                             | extramammary paget disease              | 29   | 0.24 |
|                                                             | cutaneous horn                          | 21   | 0.17 |
|                                                             | leukoplakia                             | 13   | 0.11 |
| pagets disease                                              | 9                                       | 0.07 |      |

|                                                     |                                            |     |      |
|-----------------------------------------------------|--------------------------------------------|-----|------|
|                                                     | <b>squamous cell carcinoma face</b>        | 7   | 0.06 |
|                                                     | <b>actinic cheilitis</b>                   | 5   | 0.04 |
|                                                     | <b>superficial basal cell carcinoma</b>    | 4   | 0.03 |
|                                                     | <b>basal cell nevus syndrome</b>           | 3   | 0.02 |
|                                                     | <b>arsenical keratoses</b>                 | 1   | 0.01 |
|                                                     | <b>pigmented basal cell carcinoma</b>      | 1   | 0.01 |
|                                                     | <b>solar damage</b>                        | 1   | 0.01 |
|                                                     | <b>vascular tumors and malformations</b>   | 53  | 0.44 |
|                                                     | <b>ichthyosis</b>                          | 37  | 0.31 |
|                                                     | <b>tuberous sclerosis</b>                  | 34  | 0.28 |
|                                                     | <b>neurofibromatosis</b>                   | 24  | 0.20 |
|                                                     | <b>ehlers danlos syndrome</b>              | 20  | 0.17 |
|                                                     | <b>pseudoxanthoma elasticum</b>            | 16  | 0.13 |
|                                                     | <b>dariers disease</b>                     | 13  | 0.11 |
|                                                     | <b>cowden disease</b>                      | 11  | 0.09 |
|                                                     | <b>acrodermatitis enteropathica</b>        | 10  | 0.08 |
|                                                     | <b>birt hogg dube</b>                      | 9   | 0.07 |
|                                                     | <b>xeroderma pigmentosum</b>               | 9   | 0.07 |
| <b>Genodermatoses and<br/>supernumerary growths</b> | <b>congenital erythropoietic porphyria</b> | 8   | 0.07 |
|                                                     | <b>epidermolysis bullosa</b>               | 8   | 0.07 |
|                                                     | <b>epidermolytic hyperkeratosis</b>        | 8   | 0.07 |
|                                                     | <b>hailey hailey disease</b>               | 7   | 0.06 |
|                                                     | <b>rothmund thomson syndrome</b>           | 6   | 0.05 |
|                                                     | <b>x linked ichthyosis</b>                 | 6   | 0.05 |
|                                                     | <b>incontinentia pigmenti</b>              | 5   | 0.04 |
|                                                     | <b>ichthyosis vulgaris</b>                 | 4   | 0.03 |
|                                                     | <b>knuckle pads</b>                        | 3   | 0.02 |
|                                                     | <b>leopard syndrome</b>                    | 3   | 0.02 |
|                                                     | <b>muir torre syndrome</b>                 | 3   | 0.02 |
|                                                     | <b>collodion baby</b>                      | 2   | 0.02 |
|                                                     | <b>acrokeratoelastoidosis</b>              | 1   | 0.01 |
| <b>Inflammatory</b>                                 | <b>acne vulgaris</b>                       | 440 | 3.65 |
|                                                     | <b>atopic dermatitis</b>                   | 220 | 1.83 |



|                                                                       |     |      |
|-----------------------------------------------------------------------|-----|------|
| <b>psoriasis</b>                                                      | 171 | 1.42 |
| <b>lichen planus</b>                                                  | 116 | 0.96 |
| <b>toxic epidermal necrolysis and<br/>stevens johnson</b>             | 104 | 0.86 |
| <b>nummular eczema</b>                                                | 101 | 0.84 |
| <b>dermatomyositis</b>                                                | 89  | 0.74 |
| <b>scabies</b>                                                        | 88  | 0.73 |
| <b>hidradenitis</b>                                                   | 87  | 0.72 |
| <b>molluscum contagiosum</b>                                          | 85  | 0.71 |
| <b>syphilis</b>                                                       | 84  | 0.70 |
| <b>hand foot mouth</b>                                                | 74  | 0.61 |
| <b>ulcer</b>                                                          | 72  | 0.60 |
| <b>urticaria</b>                                                      | 63  | 0.52 |
| <b>lupus erythematosus systemic</b>                                   | 61  | 0.51 |
| <b>seborrheic dermatitis</b>                                          | 61  | 0.51 |
| <b>bullous pemphigoid</b>                                             | 56  | 0.46 |
| <b>wart</b>                                                           | 56  | 0.46 |
| <b>pityriasis rosea</b>                                               | 55  | 0.46 |
| <b>scarring</b>                                                       | 54  | 0.45 |
| <b>discoid lupus erythematosus</b>                                    | 53  | 0.44 |
| <b>granuloma annulare</b>                                             | 52  | 0.43 |
| <b>sarcoidosis</b>                                                    | 52  | 0.43 |
| <b>xanthomas</b>                                                      | 52  | 0.43 |
| <b>herpes simplex labialis</b>                                        | 51  | 0.42 |
| <b>pemphigus vulgaris</b>                                             | 49  | 0.41 |
| <b>gianotti crosti</b>                                                | 48  | 0.40 |
| <b>lupus erythematosus subacute<br/>cutaneous lupus erythematosus</b> | 45  | 0.37 |
| <b>pityriasis versicolor</b>                                          | 45  | 0.37 |
| <b>herpes gestationis</b>                                             | 44  | 0.37 |
| <b>orf</b>                                                            | 43  | 0.36 |
| <b>pityriasis lichenoides and pleva</b>                               | 42  | 0.35 |
| <b>allergic contact dermatitis</b>                                    | 41  | 0.34 |
| <b>atypical mycobacterium</b>                                         | 41  | 0.34 |

|                                                     |    |      |
|-----------------------------------------------------|----|------|
| <b>nail psoriasis</b>                               | 41 | 0.34 |
| <b>psoriasis palmoplantaris</b>                     | 41 | 0.34 |
| <b>varicella</b>                                    | 41 | 0.34 |
| <b>herpes zoster</b>                                | 40 | 0.33 |
| <b>lichen sclerosus skin</b>                        | 40 | 0.33 |
| <b>rosacea</b>                                      | 40 | 0.33 |
| <b>behcets disease</b>                              | 39 | 0.32 |
| <b>impetigo</b>                                     | 38 | 0.32 |
| <b>photodermatoses</b>                              | 38 | 0.32 |
| <b>insect bite</b>                                  | 37 | 0.31 |
| <b>drug eruption</b>                                | 35 | 0.29 |
| <b>diaper dermatitis</b>                            | 34 | 0.28 |
| <b>enterovirus</b>                                  | 34 | 0.28 |
| <b>psoriasis nails</b>                              | 33 | 0.27 |
| <b>measles</b>                                      | 32 | 0.27 |
| <b>vasculitis</b>                                   | 32 | 0.27 |
| <b>virus exanthem</b>                               | 32 | 0.27 |
| <b>lichen simplex</b>                               | 31 | 0.26 |
| <b>candidiasis</b>                                  | 30 | 0.25 |
| <b>keratolysis exfoliativa</b>                      | 28 | 0.23 |
| <b>alopecia</b>                                     | 27 | 0.22 |
| <b>erythema multiforme and fixed drug eruptions</b> | 27 | 0.22 |
| <b>urticarial vasculitis</b>                        | 26 | 0.22 |
| <b>grovers disease</b>                              | 25 | 0.21 |
| <b>tinea capitis</b>                                | 25 | 0.21 |
| <b>erythroderma</b>                                 | 24 | 0.20 |
| <b>morphea</b>                                      | 24 | 0.20 |
| <b>staphylococcal scalded skin syndrome</b>         | 24 | 0.20 |
| <b>acanthosis nigricans and carp</b>                | 23 | 0.19 |
| <b>tinea pedis</b>                                  | 23 | 0.19 |
| <b>atopic eczema</b>                                | 21 | 0.17 |
| <b>diabetic ulcer</b>                               | 21 | 0.17 |

|                                                            |    |      |
|------------------------------------------------------------|----|------|
| <b>pitted keratolysis</b>                                  | 21 | 0.17 |
| <b>subacute cutaneous lupus erythematosus</b>              | 20 | 0.17 |
| <b>angioedema</b>                                          | 19 | 0.16 |
| <b>contact dermatitis</b>                                  | 19 | 0.16 |
| <b>eczema herpeticum</b>                                   | 19 | 0.16 |
| <b>nodulo cystic acne vulgaris</b>                         | 19 | 0.16 |
| <b>pincer nails</b>                                        | 19 | 0.16 |
| <b>rosacea steroid</b>                                     | 19 | 0.16 |
| <b>erythrasma</b>                                          | 18 | 0.15 |
| <b>herpes simplex</b>                                      | 18 | 0.15 |
| <b>mastocytosis</b>                                        | 18 | 0.15 |
| <b>panniculitis lipodystrophy and diseases of subcutis</b> | 18 | 0.15 |
| <b>psoriasis chronic plaque</b>                            | 18 | 0.15 |
| <b>folliculitis</b>                                        | 17 | 0.14 |
| <b>myxoedema pretibial</b>                                 | 17 | 0.14 |
| <b>perioral dermatitis</b>                                 | 16 | 0.13 |
| <b>urticaria factitia</b>                                  | 16 | 0.13 |
| <b>scalp psoriasis</b>                                     | 15 | 0.12 |
| <b>tinea corporis</b>                                      | 15 | 0.12 |
| <b>tuberculosis</b>                                        | 15 | 0.12 |
| <b>erythema craquele</b>                                   | 14 | 0.12 |
| <b>keratosis pilaris and related follicular disorders</b>  | 13 | 0.11 |
| <b>onychomycosis</b>                                       | 13 | 0.11 |
| <b>axillary granular parakeratosis</b>                     | 12 | 0.10 |
| <b>chronic venous insufficiency grade ii</b>               | 12 | 0.10 |
| <b>lupus erythematosus chronicus discoides</b>             | 12 | 0.10 |
| <b>relapsing polychondritis</b>                            | 12 | 0.10 |
| <b>cellulitis</b>                                          | 11 | 0.09 |
| <b>cholinergic urticaria</b>                               | 11 | 0.09 |
| <b>eczema areola</b>                                       | 11 | 0.09 |
| <b>leprosy</b>                                             | 11 | 0.09 |

|                                                 |    |      |
|-------------------------------------------------|----|------|
| <b>roseola infantum</b>                         | 11 | 0.09 |
| <b>steroid acne</b>                             | 11 | 0.09 |
| <b>ecthyma simplex</b>                          | 10 | 0.08 |
| <b>erythema infectiosum</b>                     | 10 | 0.08 |
| <b>sunburn</b>                                  | 10 | 0.08 |
| <b>acne scar</b>                                | 9  | 0.07 |
| <b>fourniers gangrene</b>                       | 9  | 0.07 |
| <b>pachyonychia congenita</b>                   | 9  | 0.07 |
| <b>paronychia</b>                               | 9  | 0.07 |
| <b>porphyria</b>                                | 9  | 0.07 |
| <b>rhinophyma</b>                               | 9  | 0.07 |
| <b>tinea cruris</b>                             | 9  | 0.07 |
| <b>atrophy blanche</b>                          | 8  | 0.07 |
| <b>epidermolysis bullosa acquisita</b>          | 8  | 0.07 |
| <b>cryoglobulinemia</b>                         | 7  | 0.06 |
| <b>dermatitis swimming</b>                      | 7  | 0.06 |
| <b>eczema</b>                                   | 7  | 0.06 |
| <b>erysipelas</b>                               | 7  | 0.06 |
| <b>genital warts</b>                            | 7  | 0.06 |
| <b>pityriasis rubra pilaris</b>                 | 7  | 0.06 |
| <b>pseudofolliculitis barbae</b>                | 7  | 0.06 |
| <b>acne infantile</b>                           | 6  | 0.05 |
| <b>clubbing</b>                                 | 6  | 0.05 |
| <b>dermatitis herpetiformis</b>                 | 6  | 0.05 |
| <b>histiocytic disorders and proliferations</b> | 6  | 0.05 |
| <b>lichen planus oral</b>                       | 6  | 0.05 |
| <b>lichen striatus</b>                          | 6  | 0.05 |
| <b>pemphigus foliaceus</b>                      | 6  | 0.05 |
| <b>poikiloderma civatte</b>                     | 6  | 0.05 |
| <b>scleromyxedema</b>                           | 6  | 0.05 |
| <b>tinea manuum</b>                             | 6  | 0.05 |
| <b>candidiasis mouth</b>                        | 5  | 0.04 |

|                                           |   |      |
|-------------------------------------------|---|------|
| <b>dry skin eczema</b>                    | 5 | 0.04 |
| <b>eczema nummular</b>                    | 5 | 0.04 |
| <b>hidroa vacciniforme</b>                | 5 | 0.04 |
| <b>irritant contact dermatitis</b>        | 5 | 0.04 |
| <b>notalgia paraesthetica</b>             | 5 | 0.04 |
| <b>pyoderma faciale</b>                   | 5 | 0.04 |
| <b>scarlet fever</b>                      | 5 | 0.04 |
| <b>tinea barbae</b>                       | 5 | 0.04 |
| <b>tinea faciei</b>                       | 5 | 0.04 |
| <b>wound infection</b>                    | 5 | 0.04 |
| <b>acne keloidalis</b>                    | 4 | 0.03 |
| <b>cicatrical pemphigoid</b>              | 4 | 0.03 |
| <b>eosinophilic pustular folliculitis</b> | 4 | 0.03 |
| <b>guttate psoriasis</b>                  | 4 | 0.03 |
| <b>henoch schonlein purpura</b>           | 4 | 0.03 |
| <b>infected eczema</b>                    | 4 | 0.03 |
| <b>intertrigo</b>                         | 4 | 0.03 |
| <b>lichen planopilaris</b>                | 4 | 0.03 |
| <b>miliaria</b>                           | 4 | 0.03 |
| <b>necrobiosis lipoidica</b>              | 4 | 0.03 |
| <b>sjogrens syndrome</b>                  | 4 | 0.03 |
| <b>spider bite</b>                        | 4 | 0.03 |
| <b>tinea incognito</b>                    | 4 | 0.03 |
| <b>tinea nigra</b>                        | 4 | 0.03 |
| <b>acanthoma fissuratum</b>               | 3 | 0.02 |
| <b>acne excoriee</b>                      | 3 | 0.02 |
| <b>acne fulminans</b>                     | 3 | 0.02 |
| <b>acute eczema</b>                       | 3 | 0.02 |
| <b>beaus lines</b>                        | 3 | 0.02 |
| <b>chancroid</b>                          | 3 | 0.02 |
| <b>diabetic bullae</b>                    | 3 | 0.02 |
| <b>erysipeloid</b>                        | 3 | 0.02 |
| <b>erythema ab igne</b>                   | 3 | 0.02 |

|                                              |   |      |
|----------------------------------------------|---|------|
| <b>erythema elevatum diutinum</b>            | 3 | 0.02 |
| <b>erythromelalgia</b>                       | 3 | 0.02 |
| <b>hypereosinophilic syndrome</b>            | 3 | 0.02 |
| <b>interstitial granulomatous dermatitis</b> | 3 | 0.02 |
| <b>lichen</b>                                | 3 | 0.02 |
| <b>livedo reticularis</b>                    | 3 | 0.02 |
| <b>lymphedema</b>                            | 3 | 0.02 |
| <b>reticular erythematous mucinosis</b>      | 3 | 0.02 |
| <b>sycosis barbae</b>                        | 3 | 0.02 |
| <b>terry nails</b>                           | 3 | 0.02 |
| <b>tinea ringworm border</b>                 | 3 | 0.02 |
| <b>cutis marmorata</b>                       | 2 | 0.02 |
| <b>degos disease</b>                         | 2 | 0.02 |
| <b>epidermodysplasia verruciformis</b>       | 2 | 0.02 |
| <b>geographic tongue</b>                     | 2 | 0.02 |
| <b>ischemia</b>                              | 2 | 0.02 |
| <b>lichen nitidus</b>                        | 2 | 0.02 |
| <b>malassezia folliculitis</b>               | 2 | 0.02 |
| <b>onychogryphosis</b>                       | 2 | 0.02 |
| <b>onycholysis</b>                           | 2 | 0.02 |
| <b>patch testing</b>                         | 2 | 0.02 |
| <b>radiodermatitis</b>                       | 2 | 0.02 |
| <b>rheumatoid nodule</b>                     | 2 | 0.02 |
| <b>solar elastosis</b>                       | 2 | 0.02 |
| <b>thermal burn</b>                          | 2 | 0.02 |
| <b>thrombangiitis obliterans</b>             | 2 | 0.02 |
| <b>acne conglobata</b>                       | 1 | 0.01 |
| <b>erosio interdigitalis blastomycetica</b>  | 1 | 0.01 |
| <b>half and half nail</b>                    | 1 | 0.01 |
| <b>ingrown nail</b>                          | 1 | 0.01 |
| <b>koilonychia</b>                           | 1 | 0.01 |
| <b>lupus vulgaris</b>                        | 1 | 0.01 |
| <b>pemphigus</b>                             | 1 | 0.01 |

|                                    |                                    |              |               |
|------------------------------------|------------------------------------|--------------|---------------|
|                                    | psoriatic erythroderma             | 1            | 0.01          |
|                                    | purpura                            | 1            | 0.01          |
|                                    | stomatitis                         | 1            | 0.01          |
|                                    | wells syndrome                     | 1            | 0.01          |
| <b>Malignant dermal tumor</b>      | sarcoma                            | 21           | 0.17          |
|                                    | merkel cell carcinoma              | 5            | 0.04          |
|                                    | dermatofibrosarcoma protuberans    | 2            | 0.02          |
| <b>Pigmented lesions benign</b>    | solar lentigo                      | 65           | 0.54          |
|                                    | melanocytic nevi                   | 49           | 0.41          |
|                                    | nevus cell nevus                   | 31           | 0.26          |
|                                    | café au lait spot                  | 19           | 0.16          |
|                                    | atypical nevi                      | 18           | 0.15          |
|                                    | blue nevus                         | 12           | 0.10          |
|                                    | spitz nevus                        | 8            | 0.07          |
|                                    | congenital nevus                   | 7            | 0.06          |
|                                    | halo nevus                         | 7            | 0.06          |
|                                    | nail nevus                         | 4            | 0.03          |
|                                    | labial melanotic macule            | 3            | 0.02          |
| lentigo simplex                    | 3                                  | 0.02         |               |
| ephelides                          | 1                                  | 0.01         |               |
| <b>Pigmented lesions malignant</b> | malignant melanoma                 | 121          | 1.00          |
|                                    | amelanotic malignant melanoma amm  | 35           | 0.29          |
|                                    | superficial spreading melanoma ssm | 27           | 0.22          |
|                                    | metastatic melanoma                | 23           | 0.19          |
|                                    | nodular melanoma nm                | 19           | 0.16          |
|                                    | lentigo maligna                    | 17           | 0.14          |
|                                    | acrolentiginous melanoma alm       | 10           | 0.08          |
|                                    | lentigo maligna melanoma           | 5            | 0.04          |
| nail melanoma                      | 1                                  | 0.01         |               |
|                                    | Unknown                            | 5216         | 43.30         |
|                                    | <b>All</b>                         | <b>12045</b> | <b>100.00</b> |

Supplementary Table 8: Frequency Table and False Positive Rates of Diagnoses in the Fitzpatrick 17k Dataset

Frequency table of diagnoses and False Positive Rates of evaluated skin lesion images in the Fitzpatrick 17k dataset.

All, Number of all evaluated skin lesion images in the Fitzpatrick 17k dataset; FPR, False positive rate (%) of the diagnosis in the Fitzpatrick 17k dataset; n, Number of occurrences of diagnosis; Unknown, Diagnosis unknown or unmapped; %, percentage of diagnosis in relation to all evaluated skin lesion images in the Fitzpatrick 17k dataset.

| Category                                                    | Diagnosis                      | n    | %    | FPR   |
|-------------------------------------------------------------|--------------------------------|------|------|-------|
| <b>Benign dermal tumors cysts sinuses</b>                   | syringoma                      | 127  | 0.77 | 4.72  |
|                                                             | telangiectases                 | 125  | 0.76 | 10.40 |
|                                                             | pyogenic granuloma             | 113  | 0.68 | 5.31  |
|                                                             | fordyce spots                  | 100  | 0.61 | 10.00 |
|                                                             | lymphangioma                   | 100  | 0.61 | 6.00  |
|                                                             | pilar cyst                     | 93   | 0.56 | 15.05 |
|                                                             | dermatofibroma                 | 79   | 0.48 | 15.19 |
|                                                             | mucous cyst                    | 78   | 0.47 | 15.38 |
|                                                             | granuloma pyogenic             | 75   | 0.45 | 5.33  |
|                                                             | becker nevus                   | 63   | 0.38 | 12.70 |
|                                                             | port wine stain                | 59   | 0.36 | 3.39  |
|                                                             | pilomatricoma                  | 53   | 0.32 | 16.98 |
|                                                             | connective tissue nevus        | 1    | 0.01 | 0.00  |
| sebaceous hyperplasia                                       | 1                              | 0.01 | 0.00 |       |
| <b>Cutaneous lymphoma and lymphoid infiltrates</b>          | cutaneous t cell lymphoma      | 159  | 0.96 | 5.03  |
| <b>Epidermal tumors hamartomas milia and growths benign</b> | porokeratosis                  | 288  | 1.74 | 3.47  |
|                                                             | epidermal nevus                | 246  | 1.49 | 8.13  |
|                                                             | prurigo nodularis              | 169  | 1.02 | 24.26 |
|                                                             | milia                          | 106  | 0.64 | 13.21 |
|                                                             | seborrheic keratosis           | 69   | 0.42 | 5.80  |
|                                                             | acquired digital fibrokeratoma | 1    | 0.01 | 0.00  |
| <b>Epidermal tumors pre malignant and malignant</b>         | basal cell carcinoma           | 434  | 2.63 | 2.30  |
|                                                             | squamous cell carcinoma        | 261  | 1.58 | 1.53  |



|                                                     |                                          |     |      |        |
|-----------------------------------------------------|------------------------------------------|-----|------|--------|
|                                                     | <b>keratoacanthoma</b>                   | 184 | 1.11 | 3.80   |
|                                                     | <b>actinic keratosis</b>                 | 128 | 0.77 | 2.34   |
|                                                     | <b>bowens disease</b>                    | 72  | 0.44 | 5.56   |
|                                                     | <b>solid cystic basal cell carcinoma</b> | 67  | 0.41 | 0.00   |
|                                                     | <b>basal cell carcinoma morpheiform</b>  | 62  | 0.38 | 1.61   |
|                                                     | <b>keratosis solar</b>                   | 29  | 0.18 | 0.00   |
|                                                     | <b>verrucous carcinoma</b>               | 26  | 0.16 | 0.00   |
|                                                     | <b>erythroplasia queyrat</b>             | 24  | 0.15 | 0.00   |
|                                                     | <b>arsenical keratoses</b>               | 11  | 0.07 | 27.27  |
|                                                     | <b>keratoacanthoma pendulum</b>          | 9   | 0.05 | 22.22  |
|                                                     | <b>basal cell carcinoma lesion</b>       | 4   | 0.02 | 0.00   |
|                                                     | <b>basal cell carcinoma lid</b>          | 4   | 0.02 | 0.00   |
|                                                     | <b>basal cell carcinoma scalp</b>        | 4   | 0.02 | 0.00   |
|                                                     | <b>hypertrophic actinic keratosis</b>    | 4   | 0.02 | 25.00  |
|                                                     | <b>basal cell carcinoma aldera</b>       | 3   | 0.02 | 0.00   |
|                                                     | <b>basal cell carcinoma ear</b>          | 3   | 0.02 | 0.00   |
|                                                     | <b>basal cell carcinoma lip</b>          | 3   | 0.02 | 0.00   |
|                                                     | <b>basal cell carcinoma trunk ext</b>    | 3   | 0.02 | 0.00   |
|                                                     | <b>basal cell carcinoma nose</b>         | 2   | 0.01 | 0.00   |
|                                                     | <b>basal cell carcinoma superficial</b>  | 2   | 0.01 | 0.00   |
|                                                     | <b>actinic cheilitis</b>                 | 1   | 0.01 | 0.00   |
|                                                     | <b>basal cell nevus syndrome</b>         | 1   | 0.01 | 100.00 |
|                                                     | <b>neurofibromatosis</b>                 | 189 | 1.14 | 30.69  |
|                                                     | <b>hailey hailey disease</b>             | 174 | 1.05 | 1.72   |
|                                                     | <b>dariers disease</b>                   | 152 | 0.92 | 5.92   |
|                                                     | <b>tuberous sclerosis</b>                | 141 | 0.85 | 9.22   |
| <b>Genodermatoses and<br/>supernumerary growths</b> | <b>ehlers danlos syndrome</b>            | 127 | 0.77 | 61.42  |
|                                                     | <b>incontinentia pigmenti</b>            | 102 | 0.62 | 9.80   |
|                                                     | <b>acrodermatitis enteropathica</b>      | 92  | 0.56 | 9.78   |
|                                                     | <b>xeroderma pigmentosum</b>             | 81  | 0.49 | 7.41   |
|                                                     | <b>epidermolysis bullosa</b>             | 70  | 0.42 | 10.00  |
|                                                     | <b>ichthyosis vulgaris</b>               | 65  | 0.39 | 13.85  |
| <b>Inflammatory</b>                                 | <b>acne vulgaris</b>                     | 513 | 3.10 | 7.21   |

|                                                                                 |     |      |       |
|---------------------------------------------------------------------------------|-----|------|-------|
| <b>psoriasis</b>                                                                | 481 | 2.91 | 6.24  |
| <b>sarcoidosis</b>                                                              | 350 | 2.12 | 6.00  |
| <b>photodermatoses</b>                                                          | 349 | 2.11 | 9.74  |
| <b>erythema multiforme and fixed drug eruptions</b>                             | 339 | 2.05 | 8.55  |
| <b>scabies</b>                                                                  | 339 | 2.05 | 14.16 |
| <b>malformations of extremities</b>                                             | 324 | 1.96 | 4.63  |
| <b>pityriasis rubra pilaris</b>                                                 | 278 | 1.68 | 3.24  |
| <b>drug eruption</b>                                                            | 265 | 1.60 | 5.28  |
| <b>nematode infection</b>                                                       | 260 | 1.57 | 8.85  |
| <b>lichen planus</b>                                                            | 254 | 1.54 | 9.45  |
| <b>depositional diseases calcinosis cutis amyloid mucinosis gout and others</b> | 219 | 1.33 | 20.09 |
| <b>granuloma annulare</b>                                                       | 210 | 1.27 | 3.33  |
| <b>folliculitis</b>                                                             | 204 | 1.23 | 23.04 |
| <b>gyrate erythemas</b>                                                         | 204 | 1.23 | 4.90  |
| <b>histiocytic disorders and proliferations</b>                                 | 194 | 1.17 | 11.34 |
| <b>pityriasis rosea</b>                                                         | 192 | 1.16 | 13.54 |
| <b>eczema</b>                                                                   | 188 | 1.14 | 7.45  |
| <b>pigmentation diseases</b>                                                    | 165 | 1.00 | 10.91 |
| <b>acanthosis nigricans and carp</b>                                            | 163 | 0.99 | 14.11 |
| <b>tungiasis</b>                                                                | 152 | 0.92 | 9.21  |
| <b>pediculosis lids</b>                                                         | 151 | 0.91 | 3.97  |
| <b>dermatomyositis</b>                                                          | 150 | 0.91 | 9.33  |
| <b>scarring</b>                                                                 | 148 | 0.90 | 9.46  |
| <b>contact dermatitis</b>                                                       | 137 | 0.83 | 0.73  |
| <b>atrophic skin disease striae and elastic fiber disorders</b>                 | 131 | 0.79 | 8.40  |
| <b>allergic contact dermatitis</b>                                              | 128 | 0.77 | 3.91  |
| <b>porphyria</b>                                                                | 128 | 0.77 | 10.94 |
| <b>seborrheic dermatitis</b>                                                    | 125 | 0.76 | 10.40 |
| <b>necrobiosis lipoidica</b>                                                    | 123 | 0.74 | 2.44  |
| <b>urticaria</b>                                                                | 120 | 0.73 | 10.00 |
| <b>lupus subacute</b>                                                           | 109 | 0.66 | 3.67  |

|                                                              |     |      |       |
|--------------------------------------------------------------|-----|------|-------|
| <b>scleromyxedema</b>                                        | 108 | 0.65 | 5.56  |
| <b>mastocytosis</b>                                          | 107 | 0.65 | 7.48  |
| <b>cheilitis</b>                                             | 106 | 0.64 | 10.38 |
| <b>scleroderma</b>                                           | 105 | 0.64 | 5.71  |
| <b>rosacea</b>                                               | 103 | 0.62 | 6.80  |
| <b>lupus erythematosus chronicus discoides</b>               | 99  | 0.60 | 10.10 |
| <b>toxic epidermal necrolysis and stevens johnson</b>        | 99  | 0.60 | 14.14 |
| <b>rhinophyma</b>                                            | 90  | 0.54 | 1.11  |
| <b>hidradenitis</b>                                          | 89  | 0.54 | 14.61 |
| <b>dyshidrotic eczema</b>                                    | 83  | 0.50 | 13.25 |
| <b>pustular skin disease non infectious</b>                  | 80  | 0.48 | 3.75  |
| <b>lichen</b>                                                | 78  | 0.47 | 5.13  |
| <b>panniculitis lipodystrophy and diseases of subcutis</b>   | 77  | 0.47 | 11.69 |
| <b>keratosis pilaris and related follicular disorders</b>    | 75  | 0.45 | 0.00  |
| <b>morphea</b>                                               | 75  | 0.45 | 2.67  |
| <b>neurotic excoriations</b>                                 | 74  | 0.45 | 31.08 |
| <b>tick bite</b>                                             | 72  | 0.44 | 27.78 |
| <b>neurodermatitis</b>                                       | 69  | 0.42 | 2.90  |
| <b>myiasis</b>                                               | 67  | 0.41 | 31.34 |
| <b>factitial dermatitis</b>                                  | 66  | 0.40 | 10.61 |
| <b>pityriasis lichenoides and pleva</b>                      | 66  | 0.40 | 6.06  |
| <b>lichen simplex</b>                                        | 65  | 0.39 | 24.62 |
| <b>behcets disease</b>                                       | 64  | 0.39 | 18.75 |
| <b>perioral dermatitis</b>                                   | 61  | 0.37 | 1.64  |
| <b>acquired autoimmune bullous diseaseherpes gestationis</b> | 60  | 0.36 | 6.67  |
| <b>livedo reticularis</b>                                    | 60  | 0.36 | 8.33  |
| <b>irritant contact dermatitis</b>                           | 59  | 0.36 | 5.08  |
| <b>paronychia</b>                                            | 59  | 0.36 | 1.69  |
| <b>pseudofolliculitis barbae</b>                             | 57  | 0.34 | 21.05 |
| <b>rhus dermatitis</b>                                       | 57  | 0.34 | 0.00  |

|                                                                 |    |      |       |
|-----------------------------------------------------------------|----|------|-------|
| <b>subacute cutaneous lupus erythematosus scler</b>             | 57 | 0.34 | 1.75  |
| <b>xanthomas</b>                                                | 57 | 0.34 | 12.28 |
| <b>erythema elevatum diutinum</b>                               | 55 | 0.33 | 3.64  |
| <b>lichen nitidus</b>                                           | 55 | 0.33 | 9.09  |
| <b>sunburn</b>                                                  | 54 | 0.33 | 9.26  |
| <b>lichen planus follicularis</b>                               | 44 | 0.27 | 4.55  |
| <b>eosinophilic pustular folliculitis</b>                       | 41 | 0.25 | 17.07 |
| <b>psoriasis inversa</b>                                        | 38 | 0.23 | 5.26  |
| <b>stasis dermatitis</b>                                        | 36 | 0.22 | 2.78  |
| <b>progressive systemic scleroderma</b>                         | 31 | 0.19 | 0.00  |
| <b>psoriasis vulgaris guttate type</b>                          | 31 | 0.19 | 6.45  |
| <b>dermographia</b>                                             | 28 | 0.17 | 3.57  |
| <b>localized scleroderma</b>                                    | 28 | 0.17 | 17.86 |
| <b>lupus erythematosus chronicus verrucosus</b>                 | 28 | 0.17 | 35.71 |
| <b>linear scleroderma</b>                                       | 24 | 0.15 | 20.83 |
| <b>lupus erythematosus systemic</b>                             | 24 | 0.15 | 16.67 |
| <b>patch testing</b>                                            | 23 | 0.14 | 17.39 |
| <b>lichen planus actinicus</b>                                  | 20 | 0.12 | 10.00 |
| <b>lupus chronic cutaneous</b>                                  | 19 | 0.11 | 5.26  |
| <b>malassezia folliculitis</b>                                  | 18 | 0.11 | 16.67 |
| <b>psoriasis arthropathica</b>                                  | 18 | 0.11 | 0.00  |
| <b>morphoea generalized</b>                                     | 17 | 0.10 | 17.65 |
| <b>lichen planus linearis</b>                                   | 15 | 0.09 | 26.67 |
| <b>psoriasis nail psoriasis</b>                                 | 15 | 0.09 | 13.33 |
| <b>lichen planus vesicular</b>                                  | 14 | 0.08 | 0.00  |
| <b>morphea linear</b>                                           | 12 | 0.07 | 8.33  |
| <b>sun damaged skin</b>                                         | 12 | 0.07 | 0.00  |
| <b>reticular erythematous mucinosis</b>                         | 11 | 0.07 | 27.27 |
| <b>stasis ulcer</b>                                             | 11 | 0.07 | 0.00  |
| <b>lupus erythematosus chronicus disseminatus superficialis</b> | 10 | 0.06 | 10.00 |
| <b>pityrosporum folliculitis</b>                                | 10 | 0.06 | 0.00  |

|                                                                       |   |      |       |
|-----------------------------------------------------------------------|---|------|-------|
| <b>metal dermatitis</b>                                               | 9 | 0.05 | 11.11 |
| <b>stasis edema</b>                                                   | 9 | 0.05 | 0.00  |
| <b>lupus acute</b>                                                    | 8 | 0.05 | 0.00  |
| <b>morphoea nodular</b>                                               | 8 | 0.05 | 0.00  |
| <b>inverse psoriasis</b>                                              | 7 | 0.04 | 0.00  |
| <b>lupus erythematosus tumidus</b>                                    | 7 | 0.04 | 0.00  |
| <b>psoriasis palms soles</b>                                          | 7 | 0.04 | 0.00  |
| <b>shoe allergy</b>                                                   | 7 | 0.04 | 42.86 |
| <b>folliculitis of barbae</b>                                         | 6 | 0.04 | 0.00  |
| <b>lichen planus verrucosus</b>                                       | 6 | 0.04 | 16.67 |
| <b>lupus erythematosus subacute<br/>cutaneous lupus erythematosus</b> | 6 | 0.04 | 0.00  |
| <b>miliaria</b>                                                       | 6 | 0.04 | 0.00  |
| <b>myxoedema pretibial</b>                                            | 6 | 0.04 | 0.00  |
| <b>stasis dermatitis and ulcers</b>                                   | 6 | 0.04 | 0.00  |
| <b>lupus erythematosus systemic lupus<br/>erythematosus</b>           | 5 | 0.03 | 0.00  |
| <b>morphoea localized</b>                                             | 5 | 0.03 | 0.00  |
| <b>nail psoriasis</b>                                                 | 5 | 0.03 | 20.00 |
| <b>pseudomonas folliculitis</b>                                       | 5 | 0.03 | 20.00 |
| <b>psoriasis penis</b>                                                | 5 | 0.03 | 0.00  |
| <b>herpes zoster</b>                                                  | 4 | 0.02 | 0.00  |
| <b>lichen planus annular</b>                                          | 4 | 0.02 | 25.00 |
| <b>lupus erythematosus mucosae oris</b>                               | 4 | 0.02 | 0.00  |
| <b>psoriasis psoriasis after erysipelas</b>                           | 4 | 0.02 | 0.00  |
| <b>psoriasis scalp</b>                                                | 4 | 0.02 | 0.00  |
| <b>subacute cutaneous lupus<br/>erythematosus</b>                     | 4 | 0.02 | 50.00 |
| <b>acne closed comedo</b>                                             | 3 | 0.02 | 0.00  |
| <b>contact dermatitis leg ulcers</b>                                  | 3 | 0.02 | 33.33 |
| <b>cosmetic fragrance allergy</b>                                     | 3 | 0.02 | 0.00  |
| <b>eczema lids</b>                                                    | 3 | 0.02 | 0.00  |
| <b>grovers disease</b>                                                | 3 | 0.02 | 0.00  |
| <b>hematogenous allergic contact<br/>dermatitis</b>                   | 3 | 0.02 | 0.00  |

|                                    |                                           |            |             |             |
|------------------------------------|-------------------------------------------|------------|-------------|-------------|
| lichen planus of the mucosa        | 3                                         | 0.02       | 0.00        |             |
| acne cystic                        | 2                                         | 0.01       | 0.00        |             |
| dermatoliposclerosis               | 2                                         | 0.01       | 50.00       |             |
| eczema acute                       | 2                                         | 0.01       | 0.00        |             |
| eczema hand                        | 2                                         | 0.01       | 0.00        |             |
| eczema scrotum                     | 2                                         | 0.01       | 0.00        |             |
| eczema vulva                       | 2                                         | 0.01       | 0.00        |             |
| impetigo                           | 2                                         | 0.01       | 0.00        |             |
| psoriasis chronic plaque           | 2                                         | 0.01       | 0.00        |             |
| psoriasis nails                    | 2                                         | 0.01       | 0.00        |             |
| acne inversa                       | 1                                         | 0.01       | 100.00      |             |
| biting fleas                       | 1                                         | 0.01       | 100.00      |             |
| bullous pemphigoid                 | 1                                         | 0.01       | 0.00        |             |
| culicosis bullosa                  | 1                                         | 0.01       | 0.00        |             |
| eczema areola                      | 1                                         | 0.01       | 0.00        |             |
| eczema arms                        | 1                                         | 0.01       | 0.00        |             |
| eczema nummular                    | 1                                         | 0.01       | 0.00        |             |
| granuloma multiforme               | 1                                         | 0.01       | 0.00        |             |
| id reaction                        | 1                                         | 0.01       | 0.00        |             |
| metabolic and nutritional diseases | 1                                         | 0.01       | 0.00        |             |
| molluscum contagiosum              | 1                                         | 0.01       | 0.00        |             |
| parapsoriasis en plaques           | 1                                         | 0.01       | 0.00        |             |
| perforating disorders              | 1                                         | 0.01       | 0.00        |             |
| psoriasis hand                     | 1                                         | 0.01       | 0.00        |             |
| reiters disease                    | 1                                         | 0.01       | 0.00        |             |
| rosacea nose                       | 1                                         | 0.01       | 0.00        |             |
| scalp psoriasis                    | 1                                         | 0.01       | 0.00        |             |
| scarring alopecia                  | 1                                         | 0.01       | 0.00        |             |
| skin diseases of pregnancy         | 1                                         | 0.01       | 0.00        |             |
| staphylococcal folliculitis        | 1                                         | 0.01       | 0.00        |             |
| varicosis                          | 1                                         | 0.01       | 0.00        |             |
| verruca vulgaris                   | 1                                         | 0.01       | 0.00        |             |
| <b>Malignant dermal tumor</b>      | <b>intermediate or malignant vascular</b> | <b>127</b> | <b>0.77</b> | <b>6.30</b> |

| <b>tumors</b>                      |                                           |       |        |       |
|------------------------------------|-------------------------------------------|-------|--------|-------|
| <b>Pigmented lesions benign</b>    | <b>halo nevus</b>                         | 82    | 0.50   | 18.29 |
|                                    | <b>nevocytic nevus</b>                    | 82    | 0.50   | 4.88  |
|                                    | <b>congenital nevus</b>                   | 66    | 0.40   | 13.64 |
|                                    | <b>blue nevus</b>                         | 1     | 0.01   | 0.00  |
| <b>Pigmented lesions malignant</b> | <b>malignant melanoma</b>                 | 369   | 2.23   | 3.25  |
|                                    | <b>superficial spreading melanoma ssm</b> | 118   | 0.71   | 7.63  |
|                                    | <b>lentigo maligna</b>                    | 80    | 0.48   | 0.00  |
|                                    | <b>malignant melanoma metastatic</b>      | 1     | 0.01   | 0.00  |
|                                    | <b>Unknown</b>                            | 473   | 2.86   | 6.13  |
|                                    | <b>All</b>                                | 16525 | 100.00 | 8.85  |

Supplementary Table 9: Frequency Table and False Positive Rates of Diagnoses in the HDA Repository

Frequency table of diagnoses and False Positive Rates of evaluated skin lesion images in the HDA repository.

All, Number of all evaluated skin lesion images in the HDA repository; HDA, hellenic dermatological atlas; n, Number of occurrences of diagnosis; FPR, False positive rate (%) of the diagnosis in the HDA repository; Unknown, Diagnosis unknown or unmapped; %, Percentage of diagnosis in relation to all evaluated skin lesion images in the HDA repository.

| Category                                  | Diagnosis                  | n  | %    | FPR    |
|-------------------------------------------|----------------------------|----|------|--------|
|                                           | hemangioma                 | 16 | 0.61 | 6.25   |
|                                           | becker nevus               | 14 | 0.54 | 35.71  |
|                                           | pyogenic granuloma         | 12 | 0.46 | 16.67  |
|                                           | granulation tissue         | 10 | 0.38 | 20.00  |
|                                           | skin tag                   | 9  | 0.34 | 22.22  |
|                                           | lymphangioma               | 8  | 0.31 | 0.00   |
|                                           | dermatofibroma             | 7  | 0.27 | 42.86  |
|                                           | fordyce spots              | 5  | 0.19 | 60.00  |
|                                           | mucous cyst                | 5  | 0.19 | 20.00  |
|                                           | steatocystoma multiplex    | 4  | 0.15 | 0.00   |
|                                           | angiokeratomas             | 3  | 0.11 | 100.00 |
|                                           | hemangioma racemosum       | 3  | 0.11 | 66.67  |
| <b>Benign dermal tumors cysts sinuses</b> | spider nevus               | 3  | 0.11 | 66.67  |
|                                           | syringoma                  | 3  | 0.11 | 0.00   |
|                                           | eruptive vellus hair cysts | 2  | 0.08 | 0.00   |
|                                           | leiomyoma                  | 2  | 0.08 | 0.00   |
|                                           | pilar cyst                 | 2  | 0.08 | 0.00   |
|                                           | telangiectases             | 2  | 0.08 | 50.00  |
|                                           | venous lake                | 2  | 0.08 | 0.00   |
|                                           | cylindroma                 | 1  | 0.04 | 100.00 |
|                                           | fibroma                    | 1  | 0.04 | 0.00   |
|                                           | granuloma pyogenic         | 1  | 0.04 | 100.00 |
|                                           | pilomatricoma              | 1  | 0.04 | 0.00   |
|                                           | sebaceous hyperplasia      | 1  | 0.04 | 100.00 |



|                                                             |                                                     |                             |      |       |       |
|-------------------------------------------------------------|-----------------------------------------------------|-----------------------------|------|-------|-------|
|                                                             | <b>trichoepithelioma</b>                            | 1                           | 0.04 | 0.00  |       |
| <b>Cutaneous lymphoma and lymphoid infiltrates</b>          | <b>cutaneous t cell lymphoma</b>                    | 33                          | 1.26 | 12.12 |       |
|                                                             | <b>lymphoma b cell</b>                              | 2                           | 0.08 | 0.00  |       |
|                                                             | <b>pseudo lymphoma other types</b>                  | 1                           | 0.04 | 0.00  |       |
|                                                             | <b>epidermal nevus</b>                              | 28                          | 1.07 | 21.43 |       |
| <b>Epidermal tumors hamartomas milia and growths benign</b> | <b>seborrheic keratosis</b>                         | 13                          | 0.50 | 0.00  |       |
|                                                             | <b>corns</b>                                        | 8                           | 0.31 | 12.50 |       |
|                                                             | <b>porokeratosis</b>                                | 5                           | 0.19 | 20.00 |       |
|                                                             | <b>callus</b>                                       | 4                           | 0.15 | 0.00  |       |
|                                                             | <b>milia</b>                                        | 3                           | 0.11 | 0.00  |       |
|                                                             | <b>giant comedo</b>                                 | 1                           | 0.04 | 0.00  |       |
|                                                             | <b>Epidermal tumors pre malignant and malignant</b> | <b>basal cell carcinoma</b> | 64   | 2.45  | 25.00 |
| <b>squamous cell carcinoma</b>                              |                                                     | 32                          | 1.22 | 12.50 |       |
| <b>keratoacanthoma</b>                                      |                                                     | 8                           | 0.31 | 12.50 |       |
| <b>actinic keratosis</b>                                    |                                                     | 7                           | 0.27 | 0.00  |       |
| <b>bowens disease</b>                                       |                                                     | 7                           | 0.27 | 0.00  |       |
| <b>hypertrophic actinic keratosis</b>                       |                                                     | 5                           | 0.19 | 0.00  |       |
| <b>actinic keratosis pigmented</b>                          |                                                     | 4                           | 0.15 | 25.00 |       |
| <b>leukoplakia</b>                                          |                                                     | 4                           | 0.15 | 0.00  |       |
| <b>pagets disease</b>                                       |                                                     | 3                           | 0.11 | 0.00  |       |
| <b>actinic keratosis lesion</b>                             |                                                     | 2                           | 0.08 | 0.00  |       |
| <b>basal cell carcinoma lid</b>                             |                                                     | 2                           | 0.08 | 50.00 |       |
| <b>basal cell carcinoma superficial</b>                     |                                                     | 2                           | 0.08 | 0.00  |       |
| <b>erythroplasia queyrat</b>                                |                                                     | 2                           | 0.08 | 0.00  |       |
| <b>keratoacanthoma pendulum</b>                             |                                                     | 2                           | 0.08 | 0.00  |       |
| <b>nevoid basal cell carcinoma syndrome</b>                 |                                                     | 2                           | 0.08 | 50.00 |       |
| <b>actinic keratosis face</b>                               |                                                     | 1                           | 0.04 | 0.00  |       |
| <b>basal cell carcinoma nose</b>                            |                                                     | 1                           | 0.04 | 0.00  |       |
| <b>basal cell carcinoma ulcerating</b>                      |                                                     | 1                           | 0.04 | 0.00  |       |
| <b>Genodermatoses and supernumerary growths</b>             |                                                     | <b>neurofibromatosis</b>    | 43   | 1.64  | 16.28 |
|                                                             |                                                     | <b>ichthyosis vulgaris</b>  | 23   | 0.88  | 34.78 |
|                                                             | <b>dariers disease</b>                              | 19                          | 0.73 | 5.26  |       |
|                                                             | <b>tuberous sclerosis</b>                           | 17                          | 0.65 | 23.53 |       |

|                     |                                              |    |      |        |
|---------------------|----------------------------------------------|----|------|--------|
|                     | peutz jehgers syndrome                       | 9  | 0.34 | 11.11  |
|                     | acrokeratosis verruciformis                  | 8  | 0.31 | 0.00   |
|                     | epidermolysis bullosa                        | 7  | 0.27 | 0.00   |
|                     | lipoid proteinosis urbach wiethe disease     | 7  | 0.27 | 28.57  |
|                     | leopard syndrome                             | 5  | 0.19 | 0.00   |
|                     | ehlers danlos syndrome                       | 4  | 0.15 | 25.00  |
|                     | pseudoxanthoma elasticum                     | 3  | 0.11 | 0.00   |
|                     | x linked ichthyosis                          | 3  | 0.11 | 33.33  |
|                     | ichthyosis sex linked                        | 2  | 0.08 | 0.00   |
|                     | albinism                                     | 1  | 0.04 | 100.00 |
|                     | hailey hailey disease                        | 1  | 0.04 | 0.00   |
|                     | supernumerary growths                        | 1  | 0.04 | 0.00   |
|                     | xeroderma pigmentosum                        | 1  | 0.04 | 100.00 |
|                     | scarring                                     | 48 | 1.84 | 16.67  |
|                     | granuloma annulare                           | 45 | 1.72 | 11.11  |
|                     | herpes zoster                                | 42 | 1.61 | 4.76   |
|                     | onychomycosis                                | 41 | 1.57 | 4.88   |
|                     | drug eruption                                | 36 | 1.38 | 2.78   |
|                     | non scarring alopecia                        | 35 | 1.34 | 28.57  |
|                     | pityriasis rosea                             | 35 | 1.34 | 14.29  |
|                     | discoid lupus erythematosus                  | 34 | 1.30 | 14.71  |
|                     | lichen sclerosus skin                        | 33 | 1.26 | 12.12  |
|                     | malformations of extremities                 | 32 | 1.22 | 9.38   |
| <b>Inflammatory</b> | psoriasis                                    | 31 | 1.19 | 12.90  |
|                     | pigmentation diseases                        | 30 | 1.15 | 23.33  |
|                     | urticaria                                    | 27 | 1.03 | 0.00   |
|                     | lichen planus annular                        | 26 | 0.99 | 3.85   |
|                     | condyloma acuminata                          | 25 | 0.96 | 28.00  |
|                     | cutaneous manifestations of systemic disease | 24 | 0.92 | 8.33   |
|                     | pustular skin disease non infectious         | 24 | 0.92 | 12.50  |
|                     | seborrheic dermatitis                        | 24 | 0.92 | 29.17  |
|                     | syphilis                                     | 24 | 0.92 | 8.33   |

|                                                                 |    |      |       |
|-----------------------------------------------------------------|----|------|-------|
| <b>insect bite</b>                                              | 22 | 0.84 | 18.18 |
| <b>warts</b>                                                    | 22 | 0.84 | 9.09  |
| <b>pityriasis versicolor</b>                                    | 21 | 0.80 | 9.52  |
| <b>reiters disease</b>                                          | 21 | 0.80 | 0.00  |
| <b>acne cystic</b>                                              | 19 | 0.73 | 10.53 |
| <b>erythema multiforme and fixed drug eruptions</b>             | 19 | 0.73 | 21.05 |
| <b>impetigo</b>                                                 | 19 | 0.73 | 10.53 |
| <b>pemphigus vulgaris</b>                                       | 19 | 0.73 | 0.00  |
| <b>psoriasis nails</b>                                          | 19 | 0.73 | 0.00  |
| <b>solar purpura</b>                                            | 19 | 0.73 | 10.53 |
| <b>bullous pemphigoid</b>                                       | 18 | 0.69 | 11.11 |
| <b>lichen planus penis</b>                                      | 18 | 0.69 | 16.67 |
| <b>mastocytosis</b>                                             | 18 | 0.69 | 11.11 |
| <b>atrophic skin disease striae and elastic fiber disorders</b> | 16 | 0.61 | 18.75 |
| <b>herpes simplex</b>                                           | 16 | 0.61 | 0.00  |
| <b>photodermatoses</b>                                          | 16 | 0.61 | 6.25  |
| <b>pityriasis lichenoides and pleva</b>                         | 16 | 0.61 | 31.25 |
| <b>tinea pedis</b>                                              | 16 | 0.61 | 0.00  |
| <b>solar elastosis</b>                                          | 15 | 0.57 | 20.00 |
| <b>atopic dermatitis</b>                                        | 14 | 0.54 | 7.14  |
| <b>dermatomyositis</b>                                          | 14 | 0.54 | 21.43 |
| <b>epidermolysis bullosa acquisita</b>                          | 14 | 0.54 | 35.71 |
| <b>molluscum contagiosum</b>                                    | 14 | 0.54 | 50.00 |
| <b>morphea</b>                                                  | 14 | 0.54 | 7.14  |
| <b>tinea faciale</b>                                            | 14 | 0.54 | 21.43 |
| <b>allergic contact dermatitis</b>                              | 13 | 0.50 | 7.69  |
| <b>candidiasis</b>                                              | 13 | 0.50 | 7.69  |
| <b>lichen</b>                                                   | 13 | 0.50 | 0.00  |
| <b>scabies</b>                                                  | 13 | 0.50 | 15.38 |
| <b>tinea incognito</b>                                          | 13 | 0.50 | 0.00  |
| <b>genital warts</b>                                            | 12 | 0.46 | 0.00  |
| <b>lichen nitidus</b>                                           | 12 | 0.46 | 0.00  |

|                                                                 |    |      |       |
|-----------------------------------------------------------------|----|------|-------|
| <b>rhus dermatitis</b>                                          | 12 | 0.46 | 0.00  |
| <b>solar damage atrophy</b>                                     | 12 | 0.46 | 8.33  |
| <b>fungal infections dermal and subcut</b>                      | 11 | 0.42 | 18.18 |
| <b>hair disorderstrichorrhexis nodosa etc</b>                   | 11 | 0.42 | 18.18 |
| <b>leukocytoclastic vasculitis</b>                              | 11 | 0.42 | 45.45 |
| <b>tinea corporis</b>                                           | 11 | 0.42 | 27.27 |
| <b>tinea cruris</b>                                             | 11 | 0.42 | 18.18 |
| <b>pityriasis rubra pilaris</b>                                 | 10 | 0.38 | 10.00 |
| <b>sarcoidosis</b>                                              | 10 | 0.38 | 0.00  |
| <b>scarring alopecia</b>                                        | 10 | 0.38 | 20.00 |
| <b>tinea capitis</b>                                            | 10 | 0.38 | 20.00 |
| <b>acanthosis nigricans and carp</b>                            | 9  | 0.34 | 0.00  |
| <b>balanitis</b>                                                | 9  | 0.34 | 0.00  |
| <b>behcets disease</b>                                          | 9  | 0.34 | 44.44 |
| <b>lupus erythematosus chronicus disseminatus superficialis</b> | 9  | 0.34 | 0.00  |
| <b>neurodermatitis</b>                                          | 9  | 0.34 | 0.00  |
| <b>perioral dermatitis</b>                                      | 9  | 0.34 | 11.11 |
| <b>psoriasis treatment</b>                                      | 9  | 0.34 | 11.11 |
| <b>scleroderma</b>                                              | 9  | 0.34 | 44.44 |
| <b>small pox</b>                                                | 9  | 0.34 | 0.00  |
| <b>erysipelas</b>                                               | 8  | 0.31 | 12.50 |
| <b>erythrasma</b>                                               | 8  | 0.31 | 12.50 |
| <b>necrobiosis lipidica</b>                                     | 8  | 0.31 | 12.50 |
| <b>panniculitis lipodystrophy and diseases of subcutis</b>      | 8  | 0.31 | 50.00 |
| <b>subacute cutaneous lupus erythematosus</b>                   | 8  | 0.31 | 75.00 |
| <b>acne necrotica</b>                                           | 7  | 0.27 | 0.00  |
| <b>erythema infectiosum</b>                                     | 7  | 0.27 | 0.00  |
| <b>folliculitis</b>                                             | 7  | 0.27 | 14.29 |
| <b>grovers disease</b>                                          | 7  | 0.27 | 0.00  |
| <b>histiocytic disorders and proliferations</b>                 | 7  | 0.27 | 0.00  |
| <b>lichen planopilaris</b>                                      | 7  | 0.27 | 14.29 |

|                                                       |   |      |       |
|-------------------------------------------------------|---|------|-------|
| <b>nail beading</b>                                   | 7 | 0.27 | 28.57 |
| <b>progressive systemic scleroderma</b>               | 7 | 0.27 | 42.86 |
| <b>toxic epidermal necrolysis and stevens johnson</b> | 7 | 0.27 | 0.00  |
| <b>xanthomas</b>                                      | 7 | 0.27 | 28.57 |
| <b>acne infantile</b>                                 | 6 | 0.23 | 50.00 |
| <b>dermatitis swimming</b>                            | 6 | 0.23 | 0.00  |
| <b>eczema</b>                                         | 6 | 0.23 | 0.00  |
| <b>hypereosinophilic syndrome</b>                     | 6 | 0.23 | 0.00  |
| <b>infected eczema</b>                                | 6 | 0.23 | 16.67 |
| <b>lupus subacute</b>                                 | 6 | 0.23 | 16.67 |
| <b>pemphigus foliaceus</b>                            | 6 | 0.23 | 0.00  |
| <b>porphyria</b>                                      | 6 | 0.23 | 83.33 |
| <b>reticular erythematous mucinosis</b>               | 6 | 0.23 | 16.67 |
| <b>rhinophyma</b>                                     | 6 | 0.23 | 16.67 |
| <b>rosacea</b>                                        | 6 | 0.23 | 16.67 |
| <b>tick bite</b>                                      | 6 | 0.23 | 16.67 |
| <b>cheilitis</b>                                      | 5 | 0.19 | 20.00 |
| <b>clubbing</b>                                       | 5 | 0.19 | 0.00  |
| <b>gyrate erythemas</b>                               | 5 | 0.19 | 0.00  |
| <b>hairy tongue</b>                                   | 5 | 0.19 | 20.00 |
| <b>ingrown nail</b>                                   | 5 | 0.19 | 20.00 |
| <b>nail psoriasis</b>                                 | 5 | 0.19 | 0.00  |
| <b>paronychia</b>                                     | 5 | 0.19 | 0.00  |
| <b>planar warts</b>                                   | 5 | 0.19 | 0.00  |
| <b>radiodermatitis</b>                                | 5 | 0.19 | 20.00 |
| <b>thrombocytopenic purpura idiopatic</b>             | 5 | 0.19 | 0.00  |
| <b>tinea manuum</b>                                   | 5 | 0.19 | 0.00  |
| <b>acne comedonica</b>                                | 4 | 0.15 | 0.00  |
| <b>acne cystica</b>                                   | 4 | 0.15 | 0.00  |
| <b>acroangiodermatitis</b>                            | 4 | 0.15 | 0.00  |
| <b>crest syndrome</b>                                 | 4 | 0.15 | 25.00 |
| <b>dermographia</b>                                   | 4 | 0.15 | 0.00  |

|                                                           |   |      |       |
|-----------------------------------------------------------|---|------|-------|
| <b>dyshidrotic eczema</b>                                 | 4 | 0.15 | 0.00  |
| <b>epidermodysplasia verruciformis</b>                    | 4 | 0.15 | 0.00  |
| <b>furuncle</b>                                           | 4 | 0.15 | 0.00  |
| <b>green nail</b>                                         | 4 | 0.15 | 0.00  |
| <b>hand foot mouth</b>                                    | 4 | 0.15 | 25.00 |
| <b>herpes simplex labialis</b>                            | 4 | 0.15 | 25.00 |
| <b>hidradenitis</b>                                       | 4 | 0.15 | 0.00  |
| <b>keratosis pilaris and related follicular disorders</b> | 4 | 0.15 | 0.00  |
| <b>leukonychia</b>                                        | 4 | 0.15 | 0.00  |
| <b>pachyonychia congenita</b>                             | 4 | 0.15 | 0.00  |
| <b>psoriasis penis</b>                                    | 4 | 0.15 | 0.00  |
| <b>spider bite</b>                                        | 4 | 0.15 | 0.00  |
| <b>thermal burn</b>                                       | 4 | 0.15 | 0.00  |
| <b>tuberculosis</b>                                       | 4 | 0.15 | 0.00  |
| <b>acne fulminans</b>                                     | 3 | 0.11 | 33.33 |
| <b>cholinergic urticaria</b>                              | 3 | 0.11 | 0.00  |
| <b>erythema ab igne</b>                                   | 3 | 0.11 | 0.00  |
| <b>granuloma</b>                                          | 3 | 0.11 | 33.33 |
| <b>herpes gestationis</b>                                 | 3 | 0.11 | 33.33 |
| <b>hyperhidrosis</b>                                      | 3 | 0.11 | 0.00  |
| <b>inverse psoriasis</b>                                  | 3 | 0.11 | 0.00  |
| <b>lichen planus</b>                                      | 3 | 0.11 | 0.00  |
| <b>metabolic and nutritional diseases</b>                 | 3 | 0.11 | 0.00  |
| <b>nail polish dermatitis</b>                             | 3 | 0.11 | 0.00  |
| <b>nummular eczema</b>                                    | 3 | 0.11 | 0.00  |
| <b>pernio and mimics</b>                                  | 3 | 0.11 | 0.00  |
| <b>pitted keratolysis</b>                                 | 3 | 0.11 | 0.00  |
| <b>acne keloidalis</b>                                    | 2 | 0.08 | 0.00  |
| <b>atopic dermatitis feet</b>                             | 2 | 0.08 | 0.00  |
| <b>dermatoliposclerosis</b>                               | 2 | 0.08 | 0.00  |
| <b>factitial dermatitis</b>                               | 2 | 0.08 | 0.00  |
| <b>irritant contact dermatitis</b>                        | 2 | 0.08 | 0.00  |

|                                                                                     |   |      |        |
|-------------------------------------------------------------------------------------|---|------|--------|
| <b>lichen planus of the mucosa</b>                                                  | 2 | 0.08 | 50.00  |
| <b>lupus miliaris disseminatus faciei</b>                                           | 2 | 0.08 | 0.00   |
| <b>meningococemia</b>                                                               | 2 | 0.08 | 50.00  |
| <b>onychogryphosis</b>                                                              | 2 | 0.08 | 0.00   |
| <b>parapsoriasis en plaques</b>                                                     | 2 | 0.08 | 50.00  |
| <b>pemphigoid bullous pemphigoid</b>                                                | 2 | 0.08 | 0.00   |
| <b>pseudofolliculitis barbae</b>                                                    | 2 | 0.08 | 0.00   |
| <b>purpura</b>                                                                      | 2 | 0.08 | 50.00  |
| <b>superficial fungal infections</b>                                                | 2 | 0.08 | 0.00   |
| <b>ulcer</b>                                                                        | 2 | 0.08 | 0.00   |
| <b>acne rosacea</b>                                                                 | 1 | 0.04 | 0.00   |
| <b>acne vulgaris</b>                                                                | 1 | 0.04 | 0.00   |
| <b>angioedema</b>                                                                   | 1 | 0.04 | 0.00   |
| <b>atopic eczema of the hands</b>                                                   | 1 | 0.04 | 0.00   |
| <b>balanitis bacterial</b>                                                          | 1 | 0.04 | 100.00 |
| <b>cercaria dermatitis</b>                                                          | 1 | 0.04 | 0.00   |
| <b>chronic recurrent aphthae</b>                                                    | 1 | 0.04 | 100.00 |
| <b>cimicosis</b>                                                                    | 1 | 0.04 | 0.00   |
| <b>connective tissue disorders</b>                                                  | 1 | 0.04 | 0.00   |
| <b>contact dermatitis</b>                                                           | 1 | 0.04 | 0.00   |
| <b>depositional diseases calcinosis cutis<br/>amyloid mucinosis gout and others</b> | 1 | 0.04 | 0.00   |
| <b>dry skin eczema</b>                                                              | 1 | 0.04 | 0.00   |
| <b>ecthyma simplex</b>                                                              | 1 | 0.04 | 0.00   |
| <b>erysipeloid</b>                                                                  | 1 | 0.04 | 0.00   |
| <b>folliculitis cheloidalis</b>                                                     | 1 | 0.04 | 100.00 |
| <b>fox fordyce disease</b>                                                          | 1 | 0.04 | 100.00 |
| <b>geographic tongue</b>                                                            | 1 | 0.04 | 0.00   |
| <b>guttate psoriasis</b>                                                            | 1 | 0.04 | 100.00 |
| <b>id reaction</b>                                                                  | 1 | 0.04 | 0.00   |
| <b>intertrigo</b>                                                                   | 1 | 0.04 | 0.00   |
| <b>lichen planus linearis</b>                                                       | 1 | 0.04 | 0.00   |
| <b>lichen planus of the mucosa erosive</b>                                          | 1 | 0.04 | 0.00   |

|                                 |                                           |    |      |        |
|---------------------------------|-------------------------------------------|----|------|--------|
|                                 | median nail dystrophy                     | 1  | 0.04 | 0.00   |
|                                 | metal dermatitis                          | 1  | 0.04 | 0.00   |
|                                 | morphea linear                            | 1  | 0.04 | 0.00   |
|                                 | myiasis                                   | 1  | 0.04 | 0.00   |
|                                 | nail diseases                             | 1  | 0.04 | 0.00   |
|                                 | nail pigmentation                         | 1  | 0.04 | 0.00   |
|                                 | onychogryphosis and onychauxis            | 1  | 0.04 | 0.00   |
|                                 | papulose bowenoide                        | 1  | 0.04 | 0.00   |
|                                 | pediculosis lids                          | 1  | 0.04 | 0.00   |
|                                 | pemphigus                                 | 1  | 0.04 | 0.00   |
|                                 | pityrosporum folliculitis                 | 1  | 0.04 | 0.00   |
|                                 | psoriasis chronic plaque                  | 1  | 0.04 | 100.00 |
|                                 | psoriasis light sensitive                 | 1  | 0.04 | 0.00   |
|                                 | psoriatic erythroderma                    | 1  | 0.04 | 0.00   |
|                                 | scrophuloderma                            | 1  | 0.04 | 0.00   |
|                                 | shaving folliculitis                      | 1  | 0.04 | 0.00   |
|                                 | skin diseases of pregnancy                | 1  | 0.04 | 0.00   |
|                                 | splinter hemorrhage                       | 1  | 0.04 | 0.00   |
|                                 | stasis dermatitis                         | 1  | 0.04 | 0.00   |
|                                 | sunburn                                   | 1  | 0.04 | 0.00   |
|                                 | tattoo and foreign body reactions         | 1  | 0.04 | 0.00   |
|                                 | terry nails                               | 1  | 0.04 | 0.00   |
|                                 | tinea faciei                              | 1  | 0.04 | 0.00   |
|                                 | tinea nigra                               | 1  | 0.04 | 0.00   |
|                                 | trichomycosis                             | 1  | 0.04 | 0.00   |
|                                 | urticarial vasculitis                     | 1  | 0.04 | 0.00   |
|                                 | virus exanthem                            | 1  | 0.04 | 0.00   |
|                                 | wart                                      | 1  | 0.04 | 100.00 |
|                                 | warts periungual                          | 1  | 0.04 | 0.00   |
| <hr/>                           |                                           |    |      |        |
| <b>Malignant dermal tumor</b>   | intermediate or malignant vascular tumors | 30 | 1.15 | 6.67   |
|                                 | systemic carcinomas                       | 20 | 0.77 | 5.00   |
| <hr/>                           |                                           |    |      |        |
| <b>Pigmented lesions benign</b> | giant melanocytic nevus                   | 18 | 0.69 | 11.11  |



|                                    |                                             |      |        |       |
|------------------------------------|---------------------------------------------|------|--------|-------|
|                                    | <b>naevus blue</b>                          | 13   | 0.50   | 23.08 |
|                                    | <b>melanocytic nevi</b>                     | 8    | 0.31   | 12.50 |
|                                    | <b>blue nevus</b>                           | 5    | 0.19   | 0.00  |
|                                    | <b>mucosal lentigines</b>                   | 5    | 0.19   | 0.00  |
|                                    | <b>naevus achromic</b>                      | 5    | 0.19   | 20.00 |
|                                    | <b>naevus halo</b>                          | 5    | 0.19   | 0.00  |
|                                    | <b>mongolian spot</b>                       | 4    | 0.15   | 50.00 |
|                                    | <b>atypical nevi</b>                        | 3    | 0.11   | 0.00  |
|                                    | <b>blue nevus ota</b>                       | 3    | 0.11   | 0.00  |
|                                    | <b>melanonychia striata</b>                 | 3    | 0.11   | 0.00  |
|                                    | <b>hereditary dysplastic nevus syndrome</b> | 2    | 0.08   | 0.00  |
|                                    | <b>café au lait spot</b>                    | 1    | 0.04   | 0.00  |
|                                    | <b>spindle cell nevus</b>                   | 1    | 0.04   | 0.00  |
|                                    | <hr/>                                       |      |        |       |
| <b>Pigmented lesions malignant</b> | <b>malignant melanoma</b>                   | 17   | 0.65   | 0.00  |
|                                    | <b>lentigo maligna</b>                      | 5    | 0.19   | 20.00 |
|                                    | <b>lentigo maligna melanoma</b>             | 1    | 0.04   | 0.00  |
|                                    | <b>nail melanoma</b>                        | 1    | 0.04   | 0.00  |
|                                    | <hr/>                                       |      |        |       |
|                                    | <b>Unknown</b>                              | 174  | 6.66   | 14.94 |
|                                    | <hr/>                                       |      |        |       |
|                                    | <b>All</b>                                  | 2614 | 100.00 | 13.70 |
|                                    | <hr/>                                       |      |        |       |

Supplementary Table 10: Frequency Table and False Positive Rates of Diagnoses in the PAD-uefs 20 Dataset

Frequency table of diagnoses and False Positive Rates of evaluated skin lesion images in the PAD-uefs 20 dataset.

All, Number of all evaluated skin lesion images in the PAD-uefs 20 dataset; FPR, False positive rate (%) of the diagnosis in the PAD-uefs 20 dataset; n, Number of occurrences of diagnosis; Unknown, Diagnosis unknown or unmapped; %, Percentage of diagnosis in relation to all evaluated skin lesion images in the PAD-uefs 20 dataset.

| <b>Category</b>                                             | <b>Diagnosis</b>               | <b>n</b> | <b>%</b> | <b>FPR</b> |
|-------------------------------------------------------------|--------------------------------|----------|----------|------------|
| <b>Epidermal tumors hamartomas milia and growths benign</b> | <b>seborrheic keratosis</b>    | 235      | 10.23    | 25.96      |
|                                                             | <b>basal cell carcinoma</b>    | 845      | 36.77    | 21.30      |
| <b>Epidermal tumors pre malignant and malignant</b>         | <b>actinic keratosis</b>       | 730      | 31.77    | 23.56      |
|                                                             | <b>squamous cell carcinoma</b> | 192      | 8.36     | 27.08      |
| <b>Pigmented lesions benign</b>                             | <b>nevus cell nevus</b>        | 244      | 10.62    | 14.75      |
| <b>Pigmented lesions malignant</b>                          | <b>malignant melanoma</b>      | 52       | 2.26     | 9.62       |
|                                                             | <b>All</b>                     | 2298     | 100.00   | 22.02      |

Supplementary Table 11: Frequency Tables and False Positive Rates of Diagnoses of the non-MPXV dataset as Excel File

The content of supplementary tables 1-10 is additionally provided as a separate file (Microsoft Excel) as supplementary table 11.

Supplementary Table 12: Performance in the detection of MPXV skin lesions using different model architectures.

Each model was trained and evaluated using a 5-fold cross-validation with the same data split in each fold. All the tested models converged after 18 to 20 epochs of training. The mean and standard deviation of sensitivity, specificity, and AUC from the 5-fold cross-validation were shown.

AUC, Area under receiver operating characteristic curve; M, Million; MPXV, Mpox virus; SD, Standard deviation.

| Architecture | Number of training parameters | Sensitivity       | Specificity       | AUC               |
|--------------|-------------------------------|-------------------|-------------------|-------------------|
| ResNet18     | 11.4M                         | 0.84 (SD: 0.056)  | 0.964 (SD: 0.006) | 0.963 (SD: 0.015) |
| ResNet34     | 21.5M                         | 0.85 (SD: 0.055)  | 0.964 (SD: 0.012) | 0.971 (SD: 0.009) |
| ResNet50     | 23.9M                         | 0.83 (SD: 0.0986) | 0.970 (SD: 0.006) | 0.968 (SD: 0.010) |
| ResNet152    | 58.5M                         | 0.86 (SD: 0.0658) | 0.963 (SD: 0.005) | 0.969 (SD: 0.009) |
| DenseNet169  | 12.8M                         | 0.84 (SD: 0.074)  | 0.977 (SD: 0.008) | 0.972 (SD: 0.011) |
| VGG19_bn     | 143M                          | 0.85 (SD: 0.073)  | 0.970 (SD:0.001 ) | 0.970 (SD: 0.014) |

Supplementary Figure 1: True Positive Rates of the MPXV-CNN in the testing cohort in coalesced and non-coalesced MPXV skin lesions.

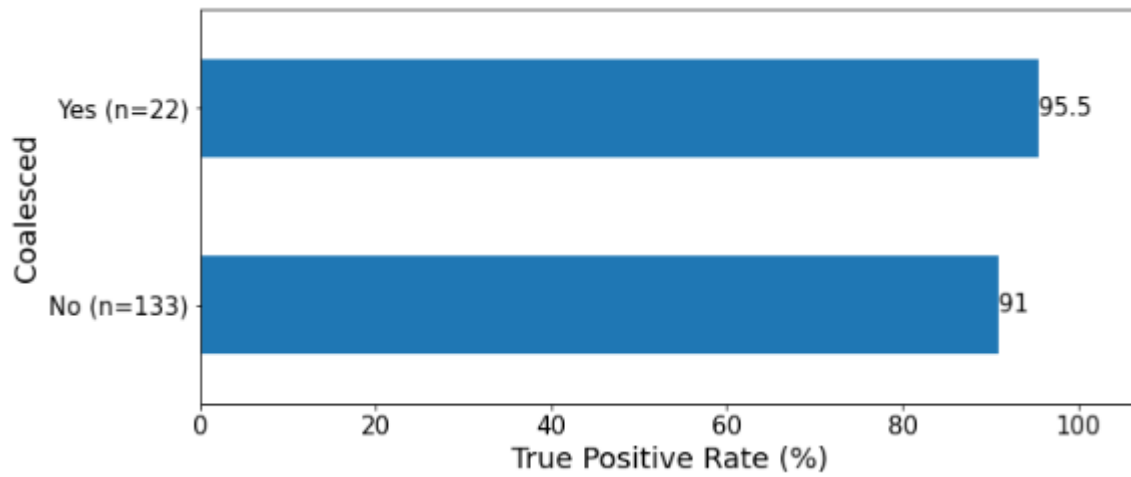

MPXV, mpox virus; MPXV-CNN, mpox virus convolutional neural network; n Number of available skin lesion images per group.

Supplementary Figure 2: False Positive Rates by category of non-MPXV skin disease in the testing cohort.

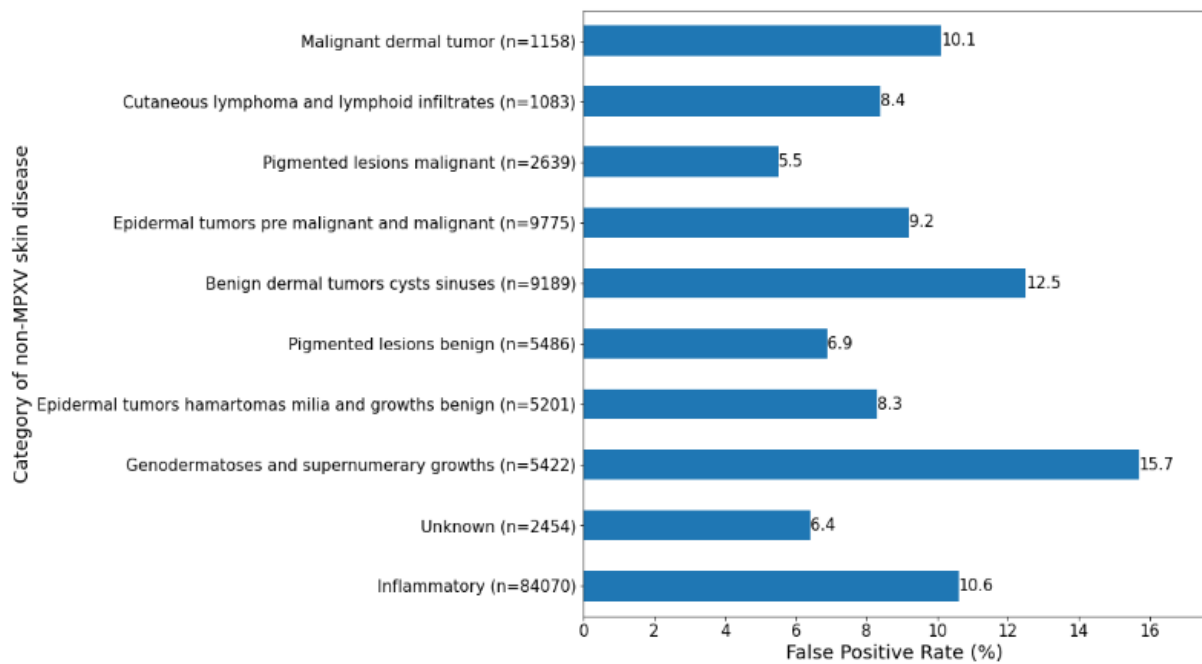

MPXV, mpox virus; n, Number of available skin lesion images per category in the non-MPXV dataset.

Supplementary Figure 3: False Positive Rates by differential diagnoses of MPXV in the testing cohort.

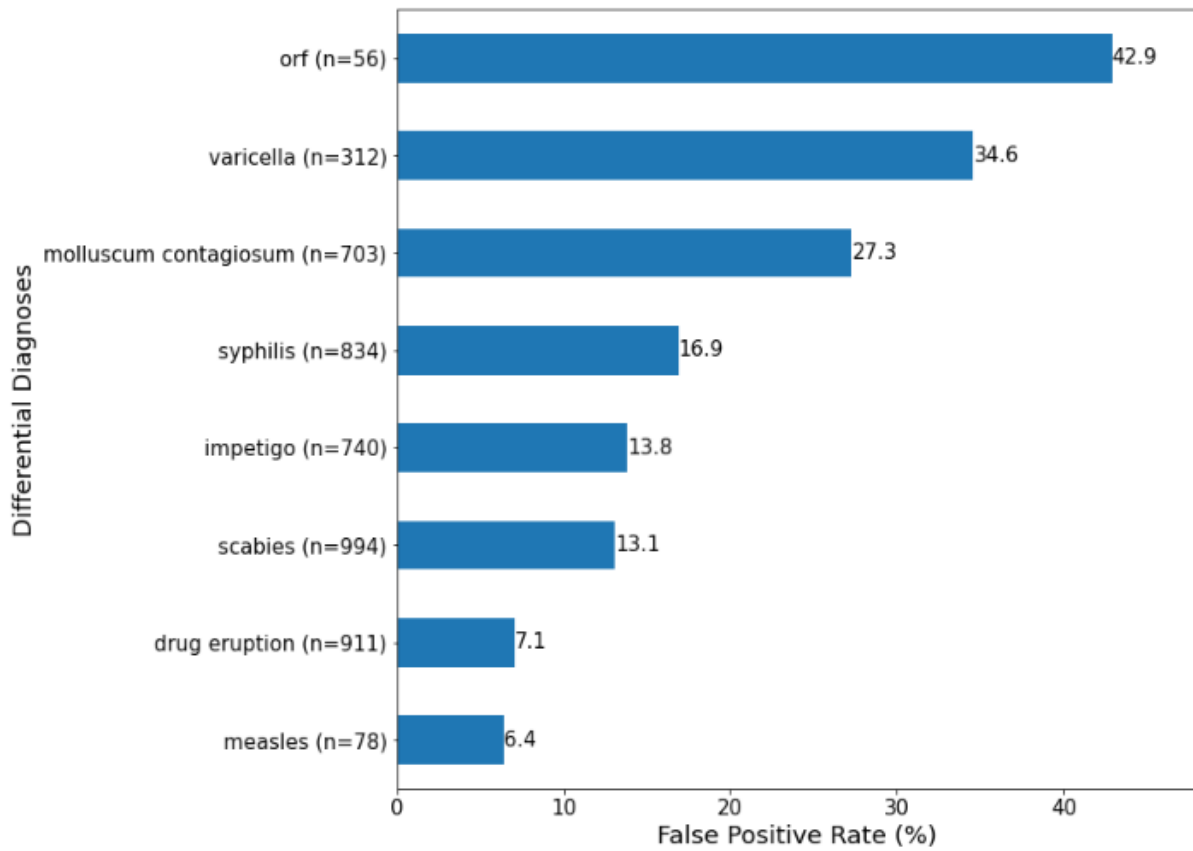

MPXV, mpox virus; n, Number of available skin lesion images per differential diagnoses in the non-MPXV dataset.

Supplementary Figure 4: False Positive Rates by body region of non-MPXV images in the testing cohort (DermIS repository).

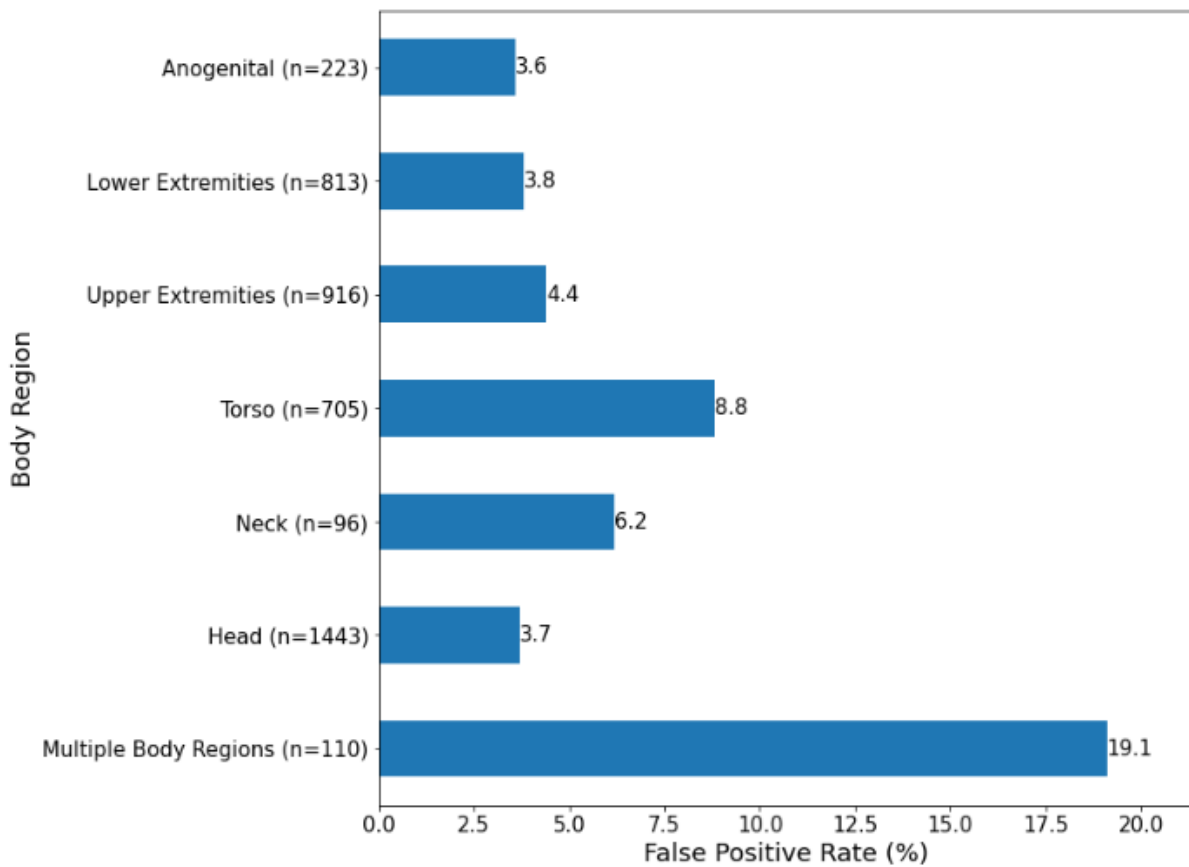

The highest FPR could be observed in images showing multiple body regions. MPXV, mpox virus; n, Number of available skin lesion images per body region.



Supplementary Figure 5: False Positive Rates by age group in non-MPXV images of the testing cohort (DermIS repository).

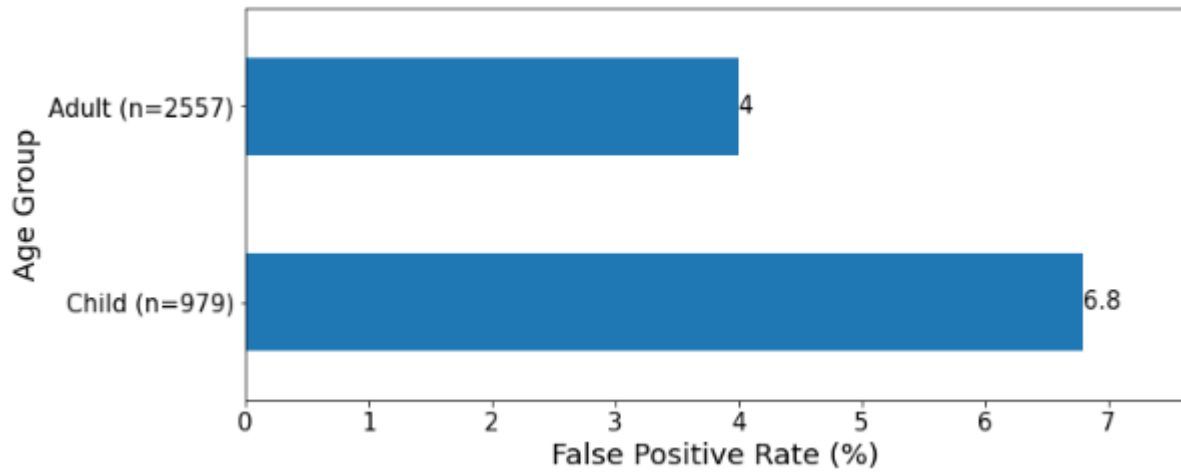

MPXV, mpox virus; n, Number of available skin lesion images per age group.

Supplementary Figure 6: False Positive Rates by sex in the testing cohort (DermIS and PAD-uefs 20).

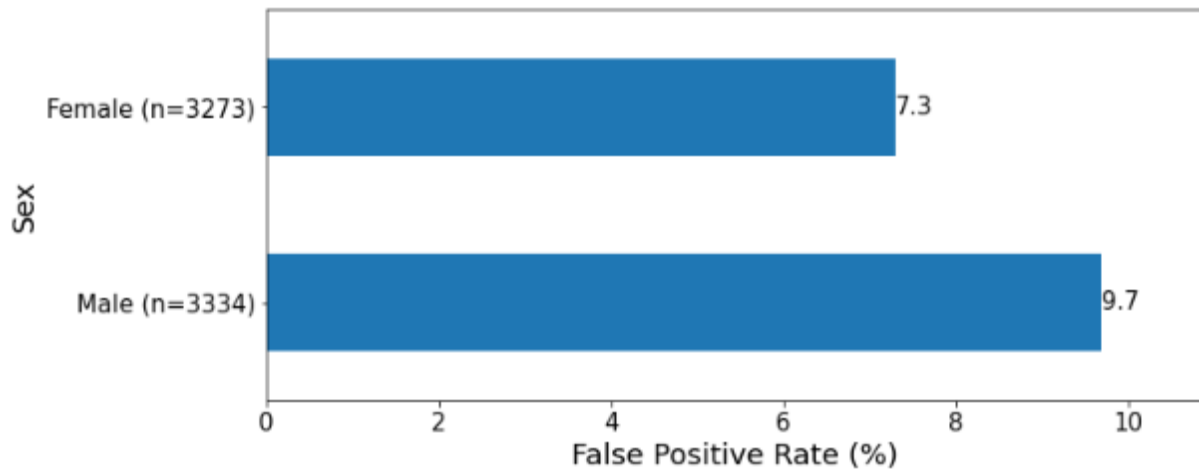

n, Number of available skin lesion images per sex.

Supplementary Figure 7: Screenshot of PoxApp for the question on the presence of a skin lesion.

← Do you have a new skin or mucosal rash/lesion?

Please take a closer look in particular at the following locations of your body: Face, palms, soles, anogenital area and oral cavity.

Here are some examples:

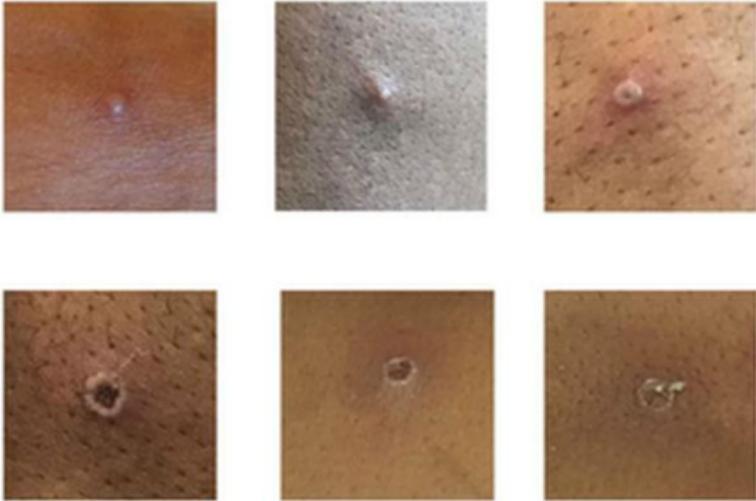

Photo source: UK Health Security Agency

Yes  
 No

Next

The user is intentionally asked very broadly to report any skin or mucosal lesion or rash. The sites of predilection of MPXV are named. Example images of MPXV skin lesions in different stages are shown without revealing to the user the underlying diagnosis. The sense of this approach is to prevent a filter effect of the question but to still sensitize users to the diverse appearance of MPXV skin lesions.

MPXV, mpox virus.

Supplementary Figure 8: Screenshot of PoxApp of interface for taking or selecting a picture of a skin lesion.

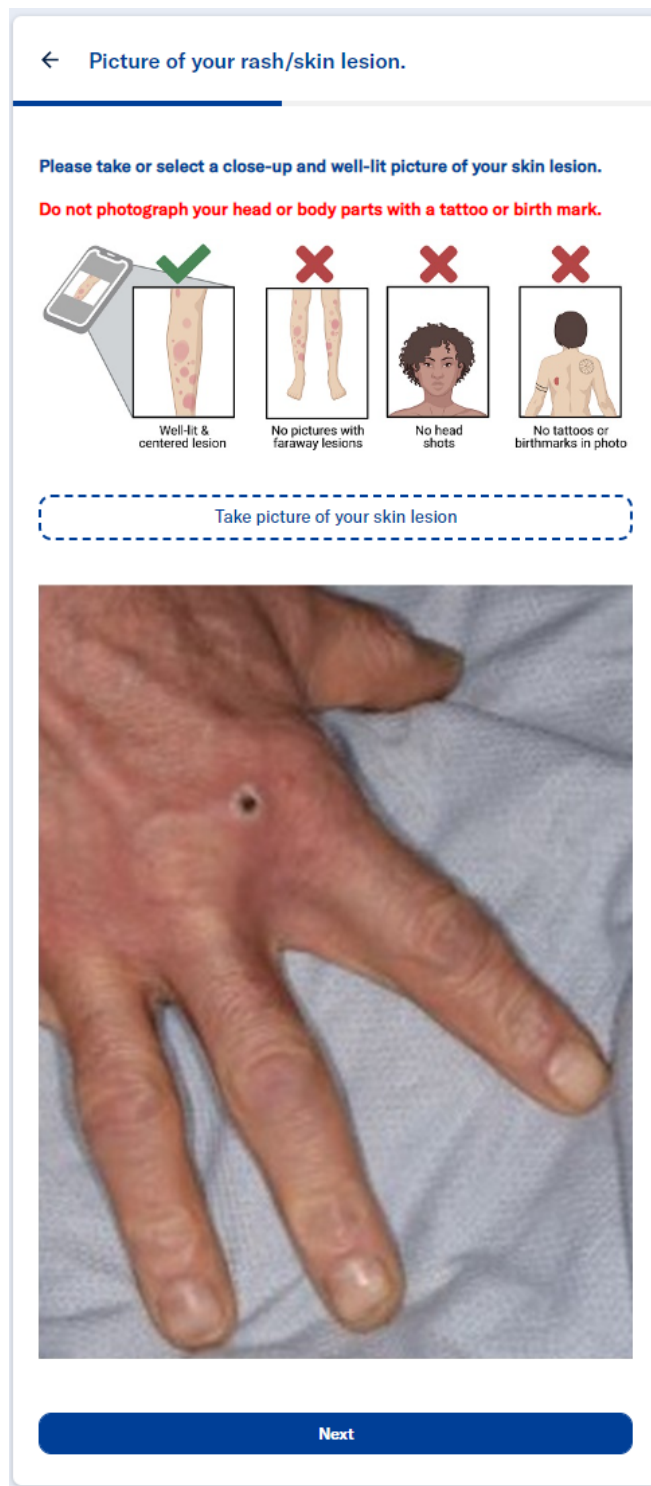

This question is optional and displayed only if a skin lesion is reported by the user. Instructions are given for taking the picture.

Supplementary Figure 9: Screenshot of PoxApp for question on typical MPXV symptoms.

← **What are your current symptoms?**

Select one or more of the symptoms below. If you do not have any of the symptoms, click on "Next".

- Fever
- Chills
- Headache
- Muscle pain
- Backpain
- Exhaustion
- Swollen lymph nodes

**Next**

MPXV, mpox virus.

Supplementary Figure 10: Screenshot of PoxApp for date of onset of symptoms.

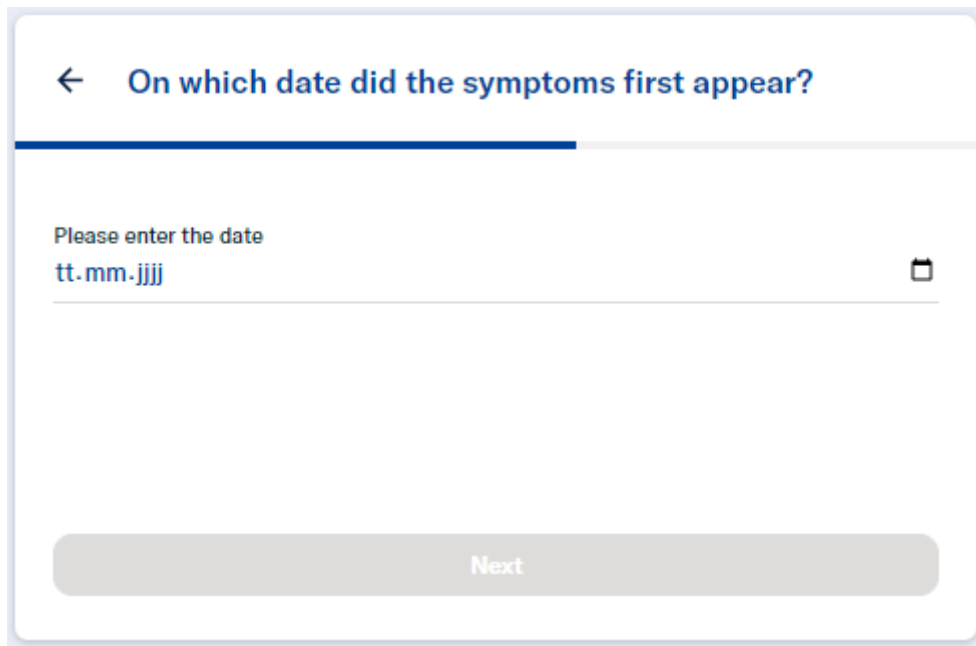

The screenshot shows a mobile application interface with a white background and a light blue border. At the top, there is a back arrow icon and the text "On which date did the symptoms first appear?". Below this is a horizontal progress bar, with the first segment filled in blue. The main content area contains the text "Please enter the date" followed by a date input field with the placeholder "tt.mm.jjjj" and a calendar icon on the right. At the bottom of the screen, there is a large, rounded, grey button labeled "Next".

The date is used to differentiate between acute and chronic symptoms and the relevancy of the symptoms. This question is optional and displayed only if symptoms are reported by the user.

Supplementary Figure 11: Screenshot of PoxApp for the question on risk contacts.

← **Have you had close contact with a person confirmed to be infected with monkeypox?**

---

Close contact with a confirmed case means:

- Direct, physical contact (touching, shaking hands, kissing).
- Contact with or exchange of body fluids.
- Sharing an apartment.
- Contact with bedding (including "making the bed").

Yes

No

**Next**

Question contains details on what is considered a risk contact.

Supplementary Figure 12: Screenshot of PoxApp for the question on the date of risk contact.



The screenshot shows a mobile application interface with a white background and a light blue border. At the top, there is a back arrow icon and the text "What was the date of the last contact?". Below this, a horizontal bar is partially filled with blue. The main content area contains the text "Please enter the date" followed by a date input field with the placeholder "tt.mm.jjjj" and a calendar icon on the right. At the bottom, there is a grey button labeled "Next".

The date is used to evaluate the relevancy of this contact considering the incubation time of MPXV. This question is optional and displayed only if a risk contact is reported by the user.

MPXV, mpox virus.



Supplementary Figure 13: Screenshot of PoxApp for the question on sexual preferences.

← **Have you had intimate contact with people outside of a relationship in the past 21 days?**

---

Yes

No

**Next**

Supplementary Figure 14: Screenshot of PoxApp for the zip code question.

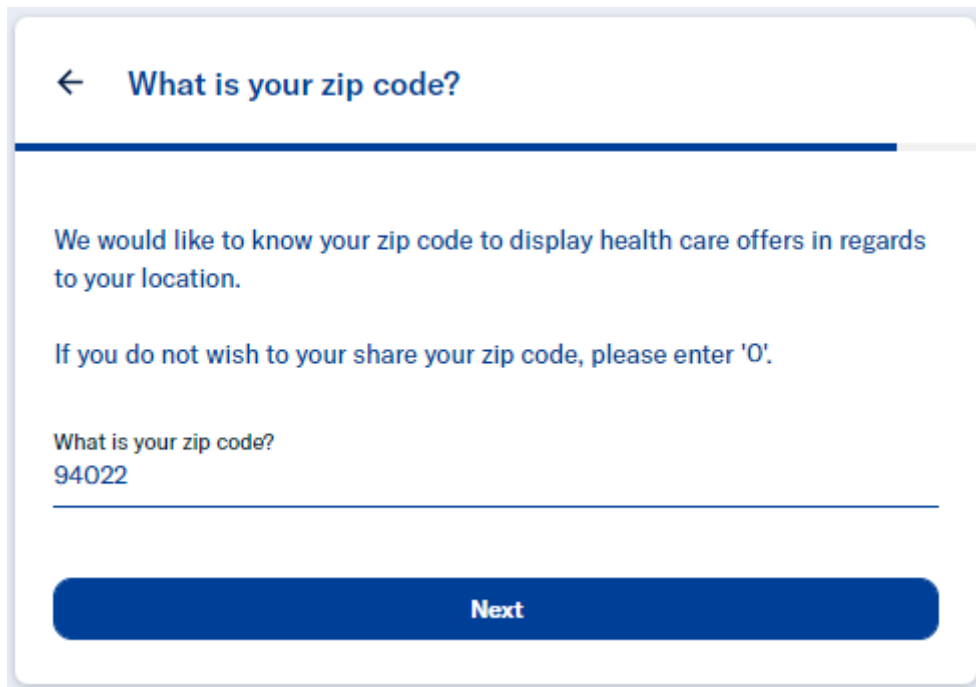

The screenshot shows a mobile application interface for asking a zip code. At the top, there is a back arrow and the title "What is your zip code?". Below this is a horizontal progress bar. The main text explains the purpose: "We would like to know your zip code to display health care offers in regards to your location." It also provides an option: "If you do not wish to your share your zip code, please enter '0'." The question "What is your zip code?" is followed by the input "94022". At the bottom, there is a large blue button labeled "Next".

The zip code was evaluated by the app's logic to display location-based healthcare offerings such as testing or vaccination sites.

Supplementary Figure 15: Logic decision tree of PoxApp for MPXV infection risk classification incorporating the MPXV-CNN.

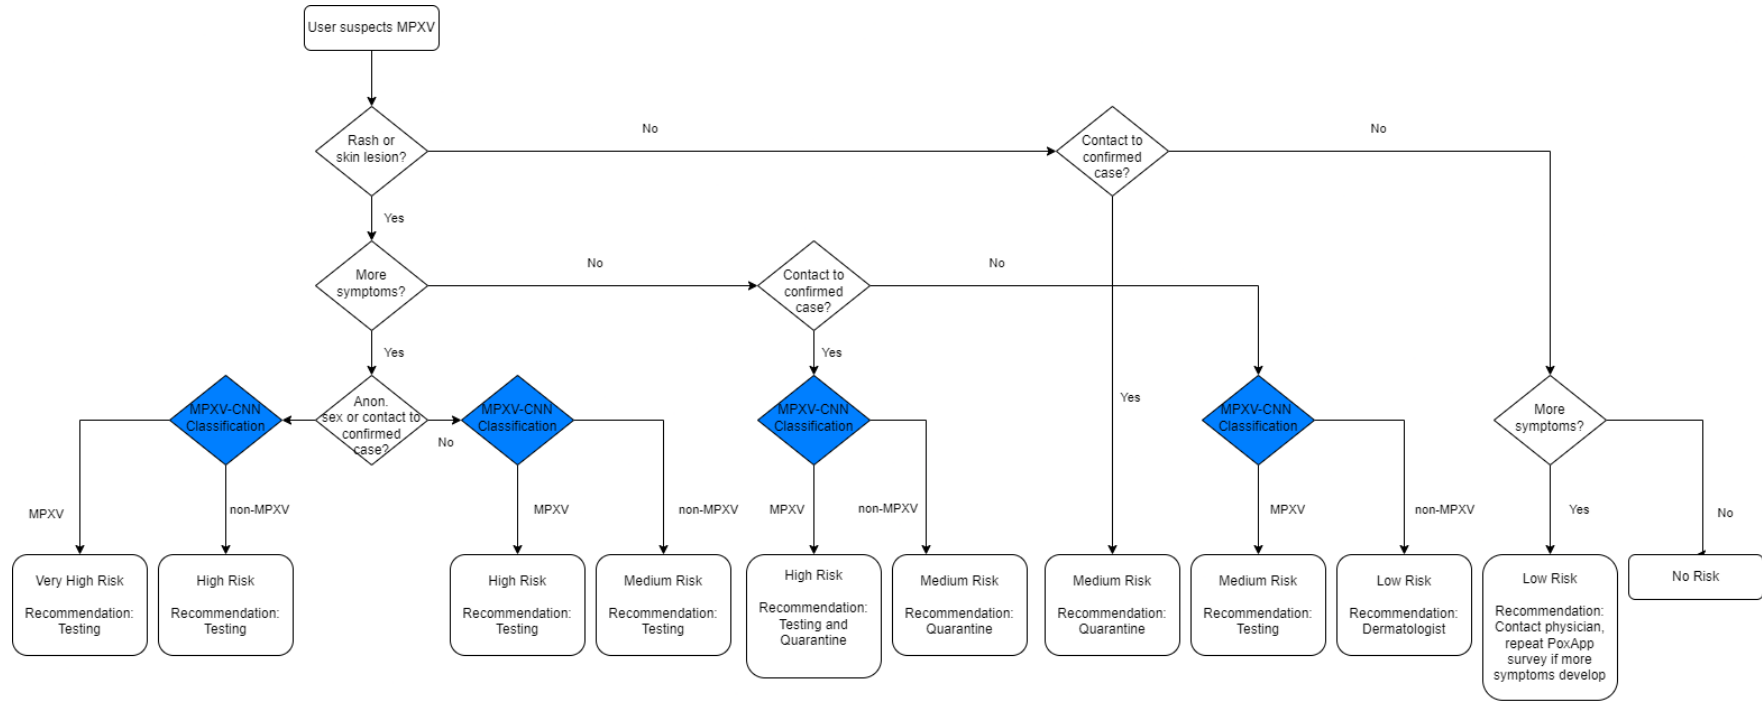

White rhombuses symbolize questions, blue rhombuses the MPXV-CNN, arrows logical expressions, and boxes risk classifications and recommendations.

MPXV, mpox virus; MPXV-CNN, mpox virus convolutional neural network.

## Supplementary Note 1: Bibliography of sources with images of MPXV lesions.

1. Mateos Moreno D, Clavo Escribano P. Infección por virus de la viruela del mono. Caso clínico. *Actas Dermosifiliogr* [Internet]. [cited 2022 Jul 13]; Available from: <http://www.actasdermo.org/es-infeccion-por-virus-viruela-del-articulo-S0001731022006020>
2. AJN. Preocupación en Israel por la «viruela del mono»: intentos por adquirir vacunas contra la enfermedad [Internet]. AJN Agencia de Noticias. 2022 [cited 2022 Jul 13]. Available from: <https://agenciaajn.com/noticia/preocupacion-en-israel-por-la-viruela-del-mono-intentos-por-adquirir-vacunas-contra-la-enfermedad-193923>
3. Sklenovská N. Monkeypox Virus. In: Malik YS, Singh RK, Dhama K, editors. *Animal-Origin Viral Zoonoses* [Internet]. Singapore: Springer; 2020 [cited 2022 Jul 12]. p. 39–68. (Livestock Diseases and Management). Available from: [https://doi.org/10.1007/978-981-15-2651-0\\_2](https://doi.org/10.1007/978-981-15-2651-0_2)
4. Lucar J, Roberts A, Saardi KM, Yee R, Siegel MO, Palmore TN. Monkeypox Virus–Associated Severe Proctitis Treated With Oral Tecovirimat: A Report of Two Cases. *Ann Intern Med* [Internet]. 2022 Aug 18 [cited 2022 Aug 27]; Available from: <https://www.acpjournals.org/doi/full/10.7326/L22-0300>
5. Català A, Clavo-Escribano P, Riera-Monroig J, Martín-Ezquerria G, Fernandez-Gonzalez P, Revelles-Peñas L, et al. Monkeypox outbreak in Spain: clinical and epidemiological findings in a prospective cross-sectional study of 185 cases. *British Journal of Dermatology* [Internet]. [cited 2022 Aug 22]. Available from: <https://onlinelibrary.wiley.com/doi/abs/10.1111/bjd.21790>
6. Eltvedt AK, Christiansen M, Poulsen A. A Case Report of Monkeypox in a 4-Year-Old Boy from the DR Congo: Challenges of Diagnosis and Management. *Case Reports in Pediatrics*. 2020 Apr 9;2020:e8572596.

7. CDC. Monkeypox in the U.S. [Internet]. Centers for Disease Control and Prevention. 2022 [cited 2022 Jul 12]. Available from:  
<https://www.cdc.gov/poxvirus/monkeypox/clinicians/clinical-recognition.html>
8. Huhn GD, Bauer AM, Yorita K, Graham MB, Sejvar J, Likos A, et al. Clinical Characteristics of Human Monkeypox, and Risk Factors for Severe Disease. *Clinical Infectious Diseases*. 2005 Dec 15;41(12):1742–51.
9. McCollum AM, Damon IK. Human Monkeypox. *Clinical Infectious Diseases*. 2014 Jan 15;58(2):260–7.
10. Ogoina D, Iroezindu M, James HI, Oladokun R, Yinka-Ogunleye A, Wakama P, et al. Clinical Course and Outcome of Human Monkeypox in Nigeria. *Clinical Infectious Diseases*. 2020 Nov 5;71(8):e210–4.
11. Weinstein RA, Nalca A, Rimoin AW, Bavari S, Whitehouse CA. Reemergence of Monkeypox: Prevalence, Diagnostics, and Countermeasures. *Clinical Infectious Diseases*. 2005 Dec 15;41(12):1765–71.
12. Mailhe M, Beaumont AL, Thy M, Le Pluart D, Perrineau S, Houhou-Fidouh N, et al. Clinical characteristics of ambulatory and hospitalised patients with monkeypox virus infection: an observational cohort study. *Clinical Microbiology and Infection* [Internet]. 2022 Aug 23 [cited 2022 Aug 27]; Available from:  
<https://www.sciencedirect.com/science/article/pii/S1198743X22004281>
13. Sukhdeo SS, Aldhaferi K, Lam PW, Walmsley S. A case of human monkeypox in Canada. *CMAJ* [Internet]. 2022 Jan 1 [cited 2022 Jul 12]; Available from:  
<https://www.cmaj.ca/content/early/2022/07/06/cmaj.220886>
14. Reynolds MG, Carroll DS, Karem KL. Factors affecting the likelihood of monkeypox’s emergence and spread in the post-smallpox era. *Current Opinion in Virology*. 2012 Jun 1;2(3):335–43.
15. Costello V, Sowash M, Gaur A, Cardis M, Pasieka H, Wortmann G, et al. Imported Monkeypox from International Traveler, Maryland, USA, 2021. *Emerg Infect Dis*. 2022 May;28(5):1002–5.

16. Erez N, Achdout H, Milrot E, Schwartz Y, Wiener-Well Y, Paran N, et al. Diagnosis of Imported Monkeypox, Israel, 2018. *Emerg Infect Dis.* 2019 May;25(5):980–3.
17. Yinka-Ogunleye A, Aruna O, Ogoina D, Aworabhi N, Eteng W, Badaru S, et al. Reemergence of Human Monkeypox in Nigeria, 2017. *Emerg Infect Dis.* 2018 Jun;24(6):1149–51.
18. Furth AMT van, Kuip M van der, Els AL van, Fievez LC, Rijckevorsel GG van, Ouden A van den, et al. Paediatric monkeypox patient with unknown source of infection, the Netherlands, June 2022. *Eurosurveillance.* 2022 Jul 21;27(29):2200552.
19. Hammerschlag Y, MacLeod G, Papadakis G, Sanchez AA, Druce J, Taiaroa G, et al. Monkeypox infection presenting as genital rash, Australia, May 2022. *Eurosurveillance.* 2022 Jun 2;27(22):2200411.
20. Monkeypox: background information [Internet]. GOV.UK. [cited 2022 Jul 12]. Available from: <https://www.gov.uk/guidance/monkeypox>
21. Mandja BAM, Gonzalez JP. Unveiling the Arcane of an Elusive Virus from the Heart of the African Continent: The Monkeypox. In: Ahmad SI, editor. *Human Viruses: Diseases, Treatments and Vaccines : The New Insights* [Internet]. Cham: Springer International Publishing; 2021 [cited 2022 Jul 12]. p. 477–99. Available from: [https://doi.org/10.1007/978-3-030-71165-8\\_22](https://doi.org/10.1007/978-3-030-71165-8_22)
22. Ajmera KM, Goyal L, Pandit T, Pandit R. Monkeypox – An emerging pandemic. *IDCases.* 2022 Jan 1;29:e01587.
23. Weaver JR, Isaacs SN. Monkeypox virus and insights into its immunomodulatory proteins. *Immunological Reviews.* 2008;225(1):96–113.
24. Noe S, Zange S, Seilmaier M, Antwerpen MH, Fenzl T, Schneider J, et al. Clinical and virological features of first human monkeypox cases in Germany. *Infection.* 2022 Jul 11;
25. de Sousa D, Patrocínio J, Frade J, Correia C, Borges-Costa J, Filipe P. Human monkeypox coinfection with acute HIV: an exuberant presentation. *Int J STD AIDS.* 2022 Jul 13;09564624221114998.

26. Khan S, Razi S, Rao B. It's Here, Monkeypox: A Case Report. *JAAD Case Reports*. 2022;
27. Heskin J, Belfield A, Milne C, Brown N, Walters Y, Scott C, et al. Transmission of monkeypox virus through sexual contact – A novel route of infection. *Journal of Infection* [Internet]. 2022 May 31 [cited 2022 Jul 12];0(0). Available from: [https://www.journalofinfection.com/article/S0163-4453\(22\)00335-8/fulltext#relatedArticles](https://www.journalofinfection.com/article/S0163-4453(22)00335-8/fulltext#relatedArticles)
28. Nolasco S, Vitale F, Geremia A, Tramuto F, Maida CM, Sciuto A, et al. First case of monkeypox virus, SARS-CoV-2 and HIV co-infection. *Journal of Infection* [Internet]. 2022 Aug 19 [cited 2022 Aug 27];0(0). Available from: [https://www.journalofinfection.com/article/S0163-4453\(22\)00479-0/fulltext](https://www.journalofinfection.com/article/S0163-4453(22)00479-0/fulltext)
29. Orviz E, Negredo A, Ayerdi O, Vázquez A, Muñoz-Gomez A, Monzón S, et al. Monkeypox outbreak in Madrid (Spain): clinical and virological aspects. *Journal of Infection* [Internet]. 2022 Jul 10 [cited 2022 Jul 19]; Available from: <https://www.sciencedirect.com/science/article/pii/S0163445322004157>
30. Monkeypox in Nigeria: a case report of re-emerged disease outbreak. [Internet]. 2018 Mar 20 [cited 2022 Jul 13]; Volume 6(Issue 2). Available from: <https://medcraveonline.com/JMEN/JMEN-06-00193.pdf>
31. de Nicolas-Ruanes B, Vivancos M j., Azcarraga-Llobet C, Moreno A m., Rodriguez-Dominguez M, Berna-Rico E d., et al. Monkeypox virus case with maculopapular exanthem and proctitis during the Spanish outbreak in 2022. *Journal of the European Academy of Dermatology and Venereology* [Internet]. [cited 2022 Jul 13]. Available from: <https://onlinelibrary.wiley.com/doi/abs/10.1111/jdv.18300>
32. Kreuter A, Grossmann M, Müller VL, Michalowicz AL, Oellig F, Silling S, et al. Monkeypox infection with concomitant penile lymphoedema. *Journal of the European Academy of Dermatology and Venereology* [Internet]. [cited 2022 Aug 27]. Available from: <https://onlinelibrary.wiley.com/doi/abs/10.1111/jdv.18502>
33. Paparizos V, Nicolaidou E, Tryfinopoulou K, Papa A, Rigopoulos D, Tsiodras S, et al. Monkeypox virus infection: First reported case in Greece in a patient with a genital

- rash. *Journal of the European Academy of Dermatology and Venereology* [Internet]. [cited 2022 Aug 27]. Available from:  
<https://onlinelibrary.wiley.com/doi/abs/10.1111/jdv.18521>
34. Kalthan E, Tenguere J, Ndjapou SG, Koyazengbe TA, Mbomba J, Marada RM, et al. Investigation of an outbreak of monkeypox in an area occupied by armed groups, Central African Republic. *Médecine et Maladies Infectieuses*. 2018 Jun 1;48(4):263–8.
  35. Morand A, Delaigue S, Morand J. Panorama des poxvirus : émergence du monkeypox. *Médecine et Santé Tropicales*. 2017 Jan 1;27(1):29–39.
  36. Minhaj FS. Monkeypox Outbreak — Nine States, May 2022. *MMWR Morb Mortal Wkly Rep* [Internet]. 2022 [cited 2022 Jul 12];71. Available from:  
<https://www.cdc.gov/mmwr/volumes/71/wr/mm7123e1.htm>
  37. Basgoz N, Brown CM, Smole SC, Madoff LC, Biddinger PD, Baugh JJ, et al. Case 24-2022: A 31-Year-Old Man with Perianal and Penile Ulcers, Rectal Pain, and Rash. *N Engl J Med* [Internet]. 2022 Jun 15 [cited 2022 Jul 12]; Available from:  
<https://www.nejm.org/doi/10.1056/NEJMcp2201244>
  38. Damon IK, Roth CE, Chowdhary V. Discovery of Monkeypox in Sudan. *New England Journal of Medicine*. 2006 Aug 31;355(9):962–3.
  39. Patrocinio-Jesus R, Peruzzi F. Monkeypox Genital Lesions. *N Engl J Med*. 2022 Jul 7;387(1):66–66.
  40. Reed KD, Melski JW, Graham MB, Regnery RL, Sotir MJ, Wegner MV, et al. The Detection of Monkeypox in Humans in the Western Hemisphere. *New England Journal of Medicine*. 2004 Jan 22;350(4):342–50.
  41. Meaney-Delman DM, Galang RR, Petersen BW, Jamieson DJ. A Primer on Monkeypox Virus for Obstetrician–Gynecologists: Diagnosis, Prevention, and Treatment. *Obstetrics & Gynecology*. 2022 May 5;10.1097/AOG.0000000000004909.



42. Nakoune E, Lampaert E, Ndjapou SG, Janssens C, Zuniga I, Van Herp M, et al. A Nosocomial Outbreak of Human Monkeypox in the Central African Republic. *Open Forum Infectious Diseases*. 2017 Oct 1;4(4):ofx168.
43. Carannante N, Tiberio C, Bellopede R, Liguori M, Di Martino F, Maturo N, et al. Monkeypox Clinical Features and Differential Diagnosis: First Case in Campania Region. *Pathogens*. 2022 Aug;11(8):869.
44. Reed KD. Monkeypox Virus Infections. In: Tabor E, editor. *Perspectives in Medical Virology* [Internet]. Elsevier; 2006 [cited 2022 Jul 12]. p. 149–60. (Emerging Viruses in Human Populations; vol. 16). Available from: <https://www.sciencedirect.com/science/article/pii/S0168706906160073>
45. Ogoina D, Izibewule JH, Ogunleye A, Ederiane E, Anebonam U, Neni A, et al. The 2017 human monkeypox outbreak in Nigeria—Report of outbreak experience and response in the Niger Delta University Teaching Hospital, Bayelsa State, Nigeria. *PLOS ONE*. 2019 Apr 17;14(4):e0214229.
46. Koenig KL, Beý CK, Marty AM. Monkeypox 2022: A Primer and Identify-Isolate-Inform (3I) Tool for Emergency Medical Services Professionals. *Prehospital and Disaster Medicine*. 2022 Aug 4;1–6.
47. Moore DA. Monkeypox Rises Around the World as CDC and WHO Respond [Internet]. *QnotesCarolinas.com*. 2022 [cited 2022 Jul 13]. Available from: <http://qnotescarolinas.com/cdc-and-who-responding-to-monkey-pox-cases-around-the-world-and-in-the-u-s/>
48. Ligon BL. Monkeypox: A review of the history and emergence in the Western hemisphere. *Seminars in Pediatric Infectious Diseases*. 2004 Oct 1;15(4):280–7.
49. Brito Caldeira M, Fernandes C. Cutaneous Lesions From Monkeypox Infection. *Sexually Transmitted Diseases*. 2022 Sep;49(9):595.
50. Zlámá M, Bartovská Z, Burantová A, Zákoucká H, Jiřincová H, Chmel M, et al. Monkeypox and herpes simplex virus type 2 coinfection: Case report of perianal lesions in HIV positive patient. *Sexually Transmitted Diseases*. :10.1097/OLQ.0000000000001694.

51. Learned LA, Reynolds MG, Wassa DW, Li Y, Olson VA, Karem K, et al. EXTENDED INTERHUMAN TRANSMISSION OF MONKEYPOX IN A HOSPITAL COMMUNITY IN THE REPUBLIC OF THE CONGO, 2003. *The American Journal of Tropical Medicine and Hygiene*. 2005 Aug 1;73(2):428–34.
52. McCollum AM, Nakazawa Y, Ndongala GM, Pukuta E, Karhemere S, Lushima RS, et al. Human Monkeypox in the Kivus, a Conflict Region of the Democratic Republic of the Congo. *Am J Trop Med Hyg*. 2015 Oct 7;93(4):718–21.
53. Reynolds MG, Emerson GL, Pukuta E, Karhemere S, Muyembe JJ, Bikindou A, et al. Detection of Human Monkeypox in the Republic of the Congo Following Intensive Community Education. *Am J Trop Med Hyg*. 2013 May 1;88(5):982–5.
54. Brundu M, Marinello S, Scaglione V, Ferrari A, Franchin E, Mazzitelli M, et al. The first case of monkeypox virus and acute HIV infection: Should we consider monkeypox a new possible sexually transmitted infection? *The Journal of Dermatology* [Internet]. [cited 2022 Aug 27]. Available from: <https://onlinelibrary.wiley.com/doi/abs/10.1111/1346-8138.16556>
55. Sejvar JJ, Chowdary Y, Schomogyi M, Stevens J, Patel J, Karem K, et al. Human Monkeypox Infection: A Family Cluster in the Midwestern United States. *The Journal of Infectious Diseases*. 2004 Nov 15;190(10):1833–40.
56. Berthet N, Nakouné E, Whist E, Selekon B, Burguière AM, Manuguerra JC, et al. Maculopapular lesions in the Central African Republic. *The Lancet*. 2011 Oct 8;378(9799):1354.
57. Seang S, Burrell S, Todesco E, Leducq V, Monsel G, Pluart DL, et al. Evidence of human-to-dog transmission of monkeypox virus. *The Lancet*. 2022 Aug 27;400(10353):658–9.
58. Tarín-Vicente EJ, Alemany A, Agud-Dios M, Ubals M, Suñer C, Antón A, et al. Clinical presentation and virological assessment of confirmed human monkeypox virus cases in Spain: a prospective observational cohort study. *The Lancet* [Internet]. 2022 Aug 8 [cited 2022 Aug 22]; Available from: <https://www.sciencedirect.com/science/article/pii/S0140673622014362>

59. Adler H, Gould S, Hine P, Snell LB, Wong W, Houlihan CF, et al. Clinical features and management of human monkeypox: a retrospective observational study in the UK. *The Lancet Infectious Diseases* [Internet]. 2022 May 24 [cited 2022 Jul 12];0(0). Available from:  
<https://www.thelancet.com/journals/laninf/article/PIIS1473-3099%2822%2900228-6/fulltext#back-bib32>
60. Girometti N, Byrne R, Bracchi M, Heskin J, McOwan A, Tittle V, et al. Demographic and clinical characteristics of confirmed human monkeypox virus cases in individuals attending a sexual health centre in London, UK: an observational analysis. *The Lancet Infectious Diseases* [Internet]. 2022 Jul 1 [cited 2022 Jul 12];0(0). Available from:  
[https://www.thelancet.com/journals/laninf/article/PIIS1473-3099\(22\)00411-X/fulltext](https://www.thelancet.com/journals/laninf/article/PIIS1473-3099(22)00411-X/fulltext)
61. Giulio DBD, Eckburg PB. Human monkeypox: an emerging zoonosis. *The Lancet Infectious Diseases*. 2004 Jan 1;4(1):15–25.
62. Ortiz-Martínez Y, Rodríguez-Morales AJ, Franco-Paredes C, Chastain DB, Gharamti AA, Vargas Barahona L, et al. Monkeypox – a description of the clinical progression of skin lesions: a case report from Colorado, USA. *Therapeutic Advances in Infection*. 2022 Jan 1;9:20499361221117730.
63. Mileto D, Riva A, Cutrera M, Moschese D, Mancon A, Meroni L, et al. New challenges in human monkeypox outside Africa: A review and case report from Italy. *Travel Medicine and Infectious Disease*. 2022 Sep 1;49:102386.
64. Moschese D, Giacomelli A, Beltrami M, Pozza G, Mileto D, Reato S, et al. Hospitalisation for monkeypox in Milan, Italy. *Travel Medicine and Infectious Disease*. 2022 Sep 1;49:102417.
65. Oprea C, Ianache I, Piscu S, Tardei G, Nica M, Ceausu E, et al. First report of monkeypox in a patient living with HIV from Romania. *Travel Medicine and Infectious Disease*. 2022 Sep 1;49:102395.

66. Quattri E, Avallone G, Maronese CA, Cusini M, Carrera CG, Marzano AV, et al. Unilesional monkeypox: A report of two cases from Italy. *Travel Medicine and Infectious Disease*. 2022 Sep 1;49:102424.
67. Vallée A, Farfour E, Zucman D. Monkeypox virus: A novel sexually transmitted disease? A case report from France. *Travel Medicine and Infectious Disease*. 2022 Sep 1;49:102394.
68. Reynolds MG, Damon IK. Outbreaks of human monkeypox after cessation of smallpox vaccination. *Trends in Microbiology*. 2012 Feb 1;20(2):80–7.
69. Brites C, Deminco F, Sá MS, Brito JT, Luz E, Stocker A. The First Two Cases of Monkeypox Infection in MSM in Bahia, Brazil, and Viral Sequencing. *Viruses*. 2022 Sep;14(9):1841.
70. Reynolds MG, McCollum AM, Nguete B, Shongo Lushima R, Petersen BW. Improving the Care and Treatment of Monkeypox Patients in Low-Resource Settings: Applying Evidence from Contemporary Biomedical and Smallpox Biodefense Research. *Viruses*. 2017 Dec 12;9(12):380.
71. Petersen E, Kantele A, Koopmans M, Asogun D, Yinka-Ogunleye A, Ihekweazu C, et al. Human Monkeypox.
72. A case of human monkeypox in Canada | CMAJ [Internet]. [cited 2022 Aug 22]. Available from: <https://www.cmaj.ca/content/194/29/E1031/tab-article-info>
73. What clinicians need to know about monkeypox in the United States and other countries [Internet]. [cited 2022 Jul 12]. Available from: <https://stacks.cdc.gov/view/cdc/117869>
74. Webinar June 29, 2022 - Monkeypox: Updates about Clinical Diagnosis and Treatment [Internet]. 2022 [cited 2022 Jul 13]. Available from: [https://emergency.cdc.gov/coca/calls/2022/callinfo\\_062922.asp](https://emergency.cdc.gov/coca/calls/2022/callinfo_062922.asp)
75. Coinfection of Monkeypox, COVID-19 and Syphilis in a PrEP using MSM: A case report from Barcelona. [Internet]. 2022 [cited 2022 Aug 27]. Available from: <https://www.researchsquare.com>

## Supplementary Note 2: URLs of non-MPXV images from DanderM, DerMIS and HDA.

<https://danderM-pdv.is.kkh.dk/atlas/pics/2/2-01.jpg>  
<https://danderM-pdv.is.kkh.dk/atlas/pics/2/2-02.jpg>  
<https://danderM-pdv.is.kkh.dk/atlas/pics/2/2-03.jpg>  
<https://danderM-pdv.is.kkh.dk/atlas/pics/2/2-04.jpg>  
<https://danderM-pdv.is.kkh.dk/atlas/pics/2/2-05.jpg>  
[https://danderM-pdv.is.kkh.dk/atlas/pics/2/2-06\\_S.jpg](https://danderM-pdv.is.kkh.dk/atlas/pics/2/2-06_S.jpg)  
<https://danderM-pdv.is.kkh.dk/atlas/pics/2/2-07.jpg>  
<https://danderM-pdv.is.kkh.dk/atlas/pics/2/2-08.jpg>  
<https://danderM-pdv.is.kkh.dk/atlas/pics/2/2-09.jpg>  
<https://danderM-pdv.is.kkh.dk/atlas/pics/2/2-10.jpg>  
<https://danderM-pdv.is.kkh.dk/atlas/pics/2/2-10-2.jpg>  
<https://danderM-pdv.is.kkh.dk/atlas/pics/2/2-10-3.jpg>  
<https://danderM-pdv.is.kkh.dk/atlas/pics/2/2-10-4.jpg>  
<https://danderM-pdv.is.kkh.dk/atlas/pics/2/2-10-5.jpg>  
<https://danderM-pdv.is.kkh.dk/atlas/pics/2/2-10-6.jpg>  
<https://danderM-pdv.is.kkh.dk/atlas/pics/2/2-10-7.jpg>  
<https://danderM-pdv.is.kkh.dk/atlas/pics/2/2-10-8.jpg>  
<https://danderM-pdv.is.kkh.dk/atlas/pics/2/2-10-9.jpg>  
<https://danderM-pdv.is.kkh.dk/atlas/pics/2/2-10-10.jpg>  
<https://danderM-pdv.is.kkh.dk/atlas/pics/2/2-10-11.jpg>  
<https://danderM-pdv.is.kkh.dk/atlas/pics/2/2-10-12.jpg>  
<https://danderM-pdv.is.kkh.dk/atlas/pics/2/2-10-13.jpg>  
<https://danderM-pdv.is.kkh.dk/atlas/pics/2/2-11.jpg>  
<https://danderM-pdv.is.kkh.dk/atlas/pics/2/2-13-1.jpg>  
<https://danderM-pdv.is.kkh.dk/atlas/pics/2/2-13-2.jpg>  
<https://danderM-pdv.is.kkh.dk/atlas/pics/2/2-13-3.jpg>  
<https://danderM-pdv.is.kkh.dk/atlas/pics/2/2-13-4.jpg>  
<https://danderM-pdv.is.kkh.dk/atlas/pics/2/2-13-5.jpg>  
<https://danderM-pdv.is.kkh.dk/atlas/pics/2/2-13-6.jpg>  
<https://danderM-pdv.is.kkh.dk/atlas/pics/2/2-13-7.jpg>  
<https://danderM-pdv.is.kkh.dk/atlas/pics/2/2-13-8.jpg>  
<https://danderM-pdv.is.kkh.dk/atlas/pics/2/2-13-9.jpg>  
<https://danderM-pdv.is.kkh.dk/atlas/pics/2/2-13-10.jpg>  
<https://danderM-pdv.is.kkh.dk/atlas/pics/2/2-13-11.jpg>  
<https://danderM-pdv.is.kkh.dk/atlas/pics/2/2-14.jpg>  
<https://danderM-pdv.is.kkh.dk/atlas/pics/2/2-14-1.jpg>  
<https://danderM-pdv.is.kkh.dk/atlas/pics/2/2-14-2.jpg>  
<https://danderM-pdv.is.kkh.dk/atlas/pics/2/2-14-3.jpg>  
<https://danderM-pdv.is.kkh.dk/atlas/pics/2/2-15.jpg>  
<https://danderM-pdv.is.kkh.dk/atlas/pics/2/2-16.jpg>  
<https://danderM-pdv.is.kkh.dk/atlas/pics/2/2-17.jpg>  
<https://danderM-pdv.is.kkh.dk/atlas/pics/2/2-17-1.jpg>  
<https://danderM-pdv.is.kkh.dk/atlas/pics/2/2-18.jpg>  
<https://danderM-pdv.is.kkh.dk/atlas/pics/2/2-19.jpg>





















































































<https://dandermpdv.is.kkh.dk/atlas/pics/5/5-140-6.jpg>  
[https://dandermpdv.is.kkh.dk/atlas/pics/5/5-140-7 .jpg](https://dandermpdv.is.kkh.dk/atlas/pics/5/5-140-7.jpg)  
<https://dandermpdv.is.kkh.dk/atlas/pics/6/6-1-slør.jpg>  
<https://dandermpdv.is.kkh.dk/atlas/pics/6/6-1-1.jpg>  
<https://dandermpdv.is.kkh.dk/atlas/pics/6/6-1-2.jpg>  
<https://dandermpdv.is.kkh.dk/atlas/pics/6/6-1-3.jpg>  
<https://dandermpdv.is.kkh.dk/atlas/pics/6/6-1-4.jpg>  
<https://dandermpdv.is.kkh.dk/atlas/pics/6/6-1-5.jpg>  
<https://dandermpdv.is.kkh.dk/atlas/pics/6/6-1-6.jpg>  
<https://dandermpdv.is.kkh.dk/atlas/pics/6/6-1-7.jpg>  
<https://dandermpdv.is.kkh.dk/atlas/pics/6/6-1-8.jpg>  
<https://dandermpdv.is.kkh.dk/atlas/pics/6/6-1-9.jpg>  
<https://dandermpdv.is.kkh.dk/atlas/pics/6/6-1-10.jpg>  
<https://dandermpdv.is.kkh.dk/atlas/pics/6/6-1-11.jpg>  
<https://dandermpdv.is.kkh.dk/atlas/pics/6/6-2-slør.jpg>  
<https://dandermpdv.is.kkh.dk/atlas/pics/6/6-3.jpg>  
<https://dandermpdv.is.kkh.dk/atlas/pics/6/6-4.jpg>  
<https://dandermpdv.is.kkh.dk/atlas/pics/6/6-5.jpg>  
<https://dandermpdv.is.kkh.dk/atlas/pics/6/6-6.jpg>  
<https://dandermpdv.is.kkh.dk/atlas/pics/6/6-6-1.jpg>  
<https://dandermpdv.is.kkh.dk/atlas/pics/6/6-7.jpg>  
<https://dandermpdv.is.kkh.dk/atlas/pics/6/6-8-slør.jpg>  
<https://dandermpdv.is.kkh.dk/atlas/pics/6/6-9.jpg>  
<https://dandermpdv.is.kkh.dk/atlas/pics/6/6-10.jpg>  
<https://dandermpdv.is.kkh.dk/atlas/pics/6/6-11-slør.jpg>  
<https://dandermpdv.is.kkh.dk/atlas/pics/6/6-12.jpg>  
<https://dandermpdv.is.kkh.dk/atlas/pics/6/6-13.jpg>  
<https://dandermpdv.is.kkh.dk/atlas/pics/6/6-13-1.jpg>  
<https://dandermpdv.is.kkh.dk/atlas/pics/6/6-13-2.jpg>  
<https://dandermpdv.is.kkh.dk/atlas/pics/6/6-14.jpg>  
<https://dandermpdv.is.kkh.dk/atlas/pics/6/6-14-1.jpg>  
<https://dandermpdv.is.kkh.dk/atlas/pics/6/6-15.jpg>  
<https://dandermpdv.is.kkh.dk/atlas/pics/6/6-15-1.jpg>  
<https://dandermpdv.is.kkh.dk/atlas/pics/6/6-15-2.jpg>  
<https://dandermpdv.is.kkh.dk/atlas/pics/6/6-15-3.jpg>  
<https://dandermpdv.is.kkh.dk/atlas/pics/6/6-16.jpg>  
<https://dandermpdv.is.kkh.dk/atlas/pics/6/6-17.jpg>  
<https://dandermpdv.is.kkh.dk/atlas/pics/6/6-17-1.jpg>  
<https://dandermpdv.is.kkh.dk/atlas/pics/6/6-17-2.jpg>  
<https://dandermpdv.is.kkh.dk/atlas/pics/6/6-18-slør.jpg>  
<https://dandermpdv.is.kkh.dk/atlas/pics/6/6-19.jpg>  
<https://dandermpdv.is.kkh.dk/atlas/pics/6/6-20-slør.jpg>  
<https://dandermpdv.is.kkh.dk/atlas/pics/6/6-21.jpg>  
<https://dandermpdv.is.kkh.dk/atlas/pics/6/6-22.jpg>  
<https://dandermpdv.is.kkh.dk/atlas/pics/6/6-23-slør.jpg>  
<https://dandermpdv.is.kkh.dk/atlas/pics/6/6-24.jpg>  
<https://dandermpdv.is.kkh.dk/atlas/pics/6/6-25.jpg>  
<https://dandermpdv.is.kkh.dk/atlas/pics/6/6-26-slør.jpg>



































































<https://dandermpdv.is.kkh.dk/atlas/pics/9/9-22.jpg>  
<https://dandermpdv.is.kkh.dk/atlas/pics/9/9-22-2.jpg>  
<https://dandermpdv.is.kkh.dk/atlas/pics/9/9-22-3.jpg>  
<https://dandermpdv.is.kkh.dk/atlas/pics/9/9-22-4.jpg>  
<https://dandermpdv.is.kkh.dk/atlas/pics/9/9-23.jpg>  
<https://dandermpdv.is.kkh.dk/atlas/pics/9/9-23-1.jpg>  
<https://dandermpdv.is.kkh.dk/atlas/pics/9/9-23-2.jpg>  
<https://dandermpdv.is.kkh.dk/atlas/pics/9/9-23-3.jpg>  
<https://dandermpdv.is.kkh.dk/atlas/pics/1/1-1.jpg>  
<https://dandermpdv.is.kkh.dk/atlas/pics/1/1-10.jpg>  
<https://dandermpdv.is.kkh.dk/atlas/pics/1/1-2.jpg>  
[https://dandermpdv.is.kkh.dk/atlas/pics/1/1-3\\_s.jpg](https://dandermpdv.is.kkh.dk/atlas/pics/1/1-3_s.jpg)  
<https://dandermpdv.is.kkh.dk/atlas/pics/1/1-4.jpg>  
<https://dandermpdv.is.kkh.dk/atlas/pics/1/1-5-1.jpg>  
<https://dandermpdv.is.kkh.dk/atlas/pics/1/1-5-2.jpg>  
<https://dandermpdv.is.kkh.dk/atlas/pics/1/1-5-3.jpg>  
<https://dandermpdv.is.kkh.dk/atlas/pics/1/1-5-4.jpg>  
<https://dandermpdv.is.kkh.dk/atlas/pics/1/1-5-5.jpg>  
<https://dandermpdv.is.kkh.dk/atlas/pics/1/1-5-6.jpg>  
<https://dandermpdv.is.kkh.dk/atlas/pics/1/1-5-7.jpg>  
<https://dandermpdv.is.kkh.dk/atlas/pics/1/1-5.jpg>  
<https://dandermpdv.is.kkh.dk/atlas/pics/1/1-6.jpg>  
<https://dandermpdv.is.kkh.dk/atlas/pics/1/1-7.jpg>  
<https://dandermpdv.is.kkh.dk/atlas/pics/1/1-8-1.jpg>  
<https://dandermpdv.is.kkh.dk/atlas/pics/1/1-8.jpg>  
<https://dandermpdv.is.kkh.dk/atlas/pics/1/1-9.jpg>  
<https://dandermpdv.is.kkh.dk/atlas/pics/2/2-103.jpg>  
<https://dandermpdv.is.kkh.dk/atlas/pics/2/2-108-5.jpg>  
<https://dandermpdv.is.kkh.dk/atlas/pics/2/2-12.jpg>  
<https://dandermpdv.is.kkh.dk/atlas/pics/2/2-13.jpg>  
<https://dandermpdv.is.kkh.dk/atlas/pics/2/2-138.jpg>  
<https://dandermpdv.is.kkh.dk/atlas/pics/2/2-145.jpg>  
<https://dandermpdv.is.kkh.dk/atlas/pics/2/2-27-6.jpg>  
<https://dandermpdv.is.kkh.dk/atlas/pics/2/2-27-7.jpg>  
<https://dandermpdv.is.kkh.dk/atlas/pics/2/2-29-1.jpg>  
<https://dandermpdv.is.kkh.dk/atlas/pics/2/2-33.jpg>  
<https://dandermpdv.is.kkh.dk/atlas/pics/2/2-58-1.jpg>  
<https://dandermpdv.is.kkh.dk/atlas/pics/2/2-60.jpg>  
<https://dandermpdv.is.kkh.dk/atlas/pics/2/2-90.jpg>  
<https://dandermpdv.is.kkh.dk/atlas/pics/2/2-91-1.jpg>  
<https://dandermpdv.is.kkh.dk/atlas/pics/2/2-91-2.jpg>  
<https://dandermpdv.is.kkh.dk/atlas/pics/2/2-91-3.jpg>  
<https://dandermpdv.is.kkh.dk/atlas/pics/2/2-91.jpg>  
<https://dandermpdv.is.kkh.dk/atlas/pics/2/2-92.jpg>  
<https://dandermpdv.is.kkh.dk/atlas/pics/2/2-93.jpg>  
<https://dandermpdv.is.kkh.dk/atlas/pics/2/2-94.jpg>  
<https://dandermpdv.is.kkh.dk/atlas/pics/2/2-95-1.jpg>  
<https://dandermpdv.is.kkh.dk/atlas/pics/2/2-95-2.jpg>



<https://dandermpdv.is.kkh.dk/atlas/pics/3/3-253.jpg>  
<https://dandermpdv.is.kkh.dk/atlas/pics/4/4-11.jpg>  
<https://dandermpdv.is.kkh.dk/atlas/pics/4/4-120.jpg>  
<https://dandermpdv.is.kkh.dk/atlas/pics/4/4-127-1.jpg>  
<https://dandermpdv.is.kkh.dk/atlas/pics/4/4-127-2.jpg>  
<https://dandermpdv.is.kkh.dk/atlas/pics/4/4-127-3.jpg>  
<https://dandermpdv.is.kkh.dk/atlas/pics/4/4-127-4.jpg>  
<https://dandermpdv.is.kkh.dk/atlas/pics/4/4-127-5.jpg>  
<https://dandermpdv.is.kkh.dk/atlas/pics/4/4-127-6.jpg>  
<https://dandermpdv.is.kkh.dk/atlas/pics/4/4-127-7.jpg>  
<https://dandermpdv.is.kkh.dk/atlas/pics/4/4-127-8.jpg>  
<https://dandermpdv.is.kkh.dk/atlas/pics/4/4-127.jpg>  
[https://dandermpdv.is.kkh.dk/atlas/pics/4/4-132\\_S.jpg](https://dandermpdv.is.kkh.dk/atlas/pics/4/4-132_S.jpg)  
<https://dandermpdv.is.kkh.dk/atlas/pics/4/4-167.jpg>  
<https://dandermpdv.is.kkh.dk/atlas/pics/4/4-168-1.jpg>  
<https://dandermpdv.is.kkh.dk/atlas/pics/4/4-168.jpg>  
<https://dandermpdv.is.kkh.dk/atlas/pics/4/4-20.jpg>  
<https://dandermpdv.is.kkh.dk/atlas/pics/4/4-69-1.jpg>  
<https://dandermpdv.is.kkh.dk/atlas/pics/4/4-69-2.jpg>  
<https://dandermpdv.is.kkh.dk/atlas/pics/4/4-69-3.jpg>  
<https://dandermpdv.is.kkh.dk/atlas/pics/4/4-69-4.jpg>  
<https://dandermpdv.is.kkh.dk/atlas/pics/4/4-72.jpg>  
<https://dandermpdv.is.kkh.dk/atlas/pics/4/4-73.jpg>  
<https://dandermpdv.is.kkh.dk/atlas/pics/4/4-74.jpg>  
<https://dandermpdv.is.kkh.dk/atlas/pics/4/4-75.jpg>  
<https://dandermpdv.is.kkh.dk/atlas/pics/4/4-76.jpg>  
<https://dandermpdv.is.kkh.dk/atlas/pics/5/5-115.jpg>  
<https://dandermpdv.is.kkh.dk/atlas/pics/5/5-116.jpg>  
<https://dandermpdv.is.kkh.dk/atlas/pics/5/5-119.jpg>  
<https://dandermpdv.is.kkh.dk/atlas/pics/5/5-120.jpg>  
<https://dandermpdv.is.kkh.dk/atlas/pics/5/5-139-1.jpg>  
<https://dandermpdv.is.kkh.dk/atlas/pics/5/5-139-2.jpg>  
<https://dandermpdv.is.kkh.dk/atlas/pics/5/5-139-3.jpg>  
<https://dandermpdv.is.kkh.dk/atlas/pics/5/5-139-4.jpg>  
<https://dandermpdv.is.kkh.dk/atlas/pics/5/5-139-5.jpg>  
<https://dandermpdv.is.kkh.dk/atlas/pics/5/5-139-6.jpg>  
<https://dandermpdv.is.kkh.dk/atlas/pics/5/5-139-7.jpg>  
<https://dandermpdv.is.kkh.dk/atlas/pics/5/5-38.jpg>  
<https://dandermpdv.is.kkh.dk/atlas/pics/5/5-39.jpg>  
<https://dandermpdv.is.kkh.dk/atlas/pics/5/5-40.jpg>  
<https://dandermpdv.is.kkh.dk/atlas/pics/5/5-42-1.jpg>  
<https://dandermpdv.is.kkh.dk/atlas/pics/5/5-69-5.jpg>  
<https://dandermpdv.is.kkh.dk/atlas/pics/5/5-69-6.jpg>  
<https://dandermpdv.is.kkh.dk/atlas/pics/5/5-86-2.jpg>  
<https://dandermpdv.is.kkh.dk/atlas/pics/5/5-88-1.jpg>  
<https://dandermpdv.is.kkh.dk/atlas/pics/5/5-88-2.jpg>  
<https://dandermpdv.is.kkh.dk/atlas/pics/5/5-88-3.jpg>  
<https://dandermpdv.is.kkh.dk/atlas/pics/5/5-88-4.jpg>

<https://danderp-dv.is.kkh.dk/atlas/pics/5/5-88-5.jpg>  
<https://danderp-dv.is.kkh.dk/atlas/pics/5/5-88-6.jpg>  
<https://danderp-dv.is.kkh.dk/atlas/pics/5/5-88-7.jpg>  
<https://danderp-dv.is.kkh.dk/atlas/pics/5/5-88-8.jpg>  
<https://danderp-dv.is.kkh.dk/atlas/pics/6/6-52-1-1.jpg>  
<https://danderp-dv.is.kkh.dk/atlas/pics/6/6-52-1-2.jpg>  
<https://danderp-dv.is.kkh.dk/atlas/pics/6/6-52-1-3.jpg>  
<https://danderp-dv.is.kkh.dk/atlas/pics/6/6-91.jpg>  
<https://danderp-dv.is.kkh.dk/atlas/pics/6/6-92.jpg>  
<https://danderp-dv.is.kkh.dk/atlas/pics/7/7-111.jpg>  
<https://danderp-dv.is.kkh.dk/atlas/pics/7/7-123-1.jpg>  
<https://danderp-dv.is.kkh.dk/atlas/pics/7/7-140-1.jpg>  
<https://danderp-dv.is.kkh.dk/atlas/pics/7/7-140-2.jpg>  
<https://danderp-dv.is.kkh.dk/atlas/pics/7/7-149.jpg>  
<https://danderp-dv.is.kkh.dk/atlas/pics/7/7-167-8.jpg>  
<https://danderp-dv.is.kkh.dk/atlas/pics/7/7-180.jpg>  
<https://danderp-dv.is.kkh.dk/atlas/pics/7/7-23.jpg>  
<https://danderp-dv.is.kkh.dk/atlas/pics/7/7-47.jpg>  
<https://danderp-dv.is.kkh.dk/atlas/pics/7/7-59.jpg>  
<https://danderp-dv.is.kkh.dk/atlas/pics/7/7-60.jpg>  
<https://danderp-dv.is.kkh.dk/atlas/pics/7/7-70.jpg>  
<https://danderp-dv.is.kkh.dk/atlas/pics/7/7-97.jpg>  
<https://danderp-dv.is.kkh.dk/atlas/pics/8/8-107.jpg>  
<https://danderp-dv.is.kkh.dk/atlas/pics/8/8-182.jpg>  
<https://danderp-dv.is.kkh.dk/atlas/pics/8/8-39.jpg>  
<https://danderp-dv.is.kkh.dk/atlas/pics/8/8-98.jpg>  
<https://danderp-dv.is.kkh.dk/atlas/pics/8/8-99.jpg>  
<https://danderp-dv.is.kkh.dk/atlas/pics/9/9-17.jpg>  
<https://www.dermis.net/bilder/CD044/550px/img0082.jpg>  
<https://www.dermis.net/bilder/CD014/550px/img0028.jpg>  
<https://www.dermis.net/bilder/CD039/550px/img0029.jpg>  
<https://www.dermis.net/bilder/CD071/550px/img0057.jpg>  
<https://www.dermis.net/bilder/CD042/550px/img0079.jpg>  
<https://www.dermis.net/bilder/CD040/550px/img0068.jpg>  
<https://www.dermis.net/bilder/CD054/550px/img0016.jpg>  
<https://www.dermis.net/bilder/CD050/550px/img0093.jpg>  
<https://www.dermis.net/bilder/CD050/550px/img0094.jpg>  
<https://www.dermis.net/bilder/CD050/550px/img0095.jpg>  
<https://www.dermis.net/bilder/CD070/550px/img0090.jpg>  
<https://www.dermis.net/bilder/CD069/550px/img0116.jpg>  
<https://www.dermis.net/bilder/CD044/550px/img0085.jpg>  
<https://www.dermis.net/bilder/CD071/550px/img0039.jpg>  
<https://www.dermis.net/bilder/CD071/550px/img0056.jpg>  
<https://www.dermis.net/bilder/CD025/550px/img0044.jpg>  
<https://www.dermis.net/bilder/CD049/550px/img0101.jpg>  
<https://www.dermis.net/bilder/CD049/550px/img0102.jpg>  
<https://www.dermis.net/bilder/CD070/550px/img0089.jpg>  
<https://www.dermis.net/bilder/CD069/550px/img0114.jpg>

<https://www.dermis.net/bilder/CD005/550px/img0103.jpg>  
<https://www.dermis.net/bilder/CD071/550px/img0113.jpg>  
<https://www.dermis.net/bilder/CD071/550px/img0052.jpg>  
<https://www.dermis.net/bilder/CD054/550px/img0063.jpg>  
<https://www.dermis.net/bilder/CD054/550px/img0064.jpg>  
<https://www.dermis.net/bilder/CD001/550px/img0090.jpg>  
<https://www.dermis.net/bilder/CD054/550px/img0062.jpg>  
<https://www.dermis.net/bilder/CD070/550px/img0017.jpg>  
<https://www.dermis.net/bilder/CD018/550px/img0003.jpg>  
<https://www.dermis.net/bilder/CD001/550px/img0042.jpg>  
<https://www.dermis.net/bilder/CD070/550px/img0018.jpg>  
<https://www.dermis.net/bilder/CD071/550px/img0025.jpg>  
<https://www.dermis.net/bilder/CD069/550px/img0036.jpg>  
<https://www.dermis.net/bilder/CD071/550px/img0099.jpg>  
<https://www.dermis.net/bilder/CD041/550px/img0010.jpg>  
<https://www.dermis.net/bilder/CD018/550px/img0047.jpg>  
<https://www.dermis.net/bilder/CD071/550px/img0073.jpg>  
<https://www.dermis.net/bilder/CD001/550px/img0051.jpg>  
<https://www.dermis.net/bilder/CD040/550px/img0087.jpg>  
<https://www.dermis.net/bilder/CD040/550px/img0088.jpg>  
<https://www.dermis.net/bilder/CD070/550px/img0021.jpg>  
<https://www.dermis.net/bilder/CD020/550px/img0004.jpg>  
<https://www.dermis.net/bilder/CD070/550px/img0015.jpg>  
<https://www.dermis.net/bilder/CD070/550px/img0016.jpg>  
<https://www.dermis.net/bilder/CD020/550px/img0003.jpg>  
<https://www.dermis.net/bilder/CD044/550px/img0064.jpg>  
<https://www.dermis.net/bilder/CD014/550px/img0085.jpg>  
<https://www.dermis.net/bilder/CD018/550px/img0106.jpg>  
<https://www.dermis.net/bilder/CD056/550px/img0025.jpg>  
<https://www.dermis.net/bilder/CD025/550px/img0050.jpg>  
<https://www.dermis.net/bilder/CD040/550px/img0095.jpg>  
<https://www.dermis.net/bilder/CD040/550px/img0096.jpg>  
<https://www.dermis.net/bilder/CD014/550px/img0065.jpg>  
<https://www.dermis.net/bilder/CD025/550px/img0051.jpg>  
<https://www.dermis.net/bilder/CD039/550px/img0039.jpg>  
<https://www.dermis.net/bilder/CD018/550px/img0069.jpg>  
<https://www.dermis.net/bilder/CD034/550px/img0017.jpg>  
<https://www.dermis.net/bilder/CD070/550px/img0029.jpg>  
<https://www.dermis.net/bilder/CD006/550px/img0076.jpg>  
<https://www.dermis.net/bilder/CD017/550px/img0087.jpg>  
<https://www.dermis.net/bilder/CD070/550px/img0028.jpg>  
<https://www.dermis.net/bilder/CD070/550px/img0026.jpg>  
<https://www.dermis.net/bilder/CD070/550px/img0027.jpg>  
<https://www.dermis.net/bilder/CD070/550px/img0033.jpg>  
<https://www.dermis.net/bilder/CD034/550px/img0014.jpg>  
<https://www.dermis.net/bilder/CD034/550px/img0015.jpg>  
<https://www.dermis.net/bilder/CD047/550px/img0094.jpg>  
<https://www.dermis.net/bilder/CD047/550px/img0095.jpg>

<https://www.dermis.net/bilder/CD047/550px/img0096.jpg>  
<https://www.dermis.net/bilder/CD069/550px/img0115.jpg>  
<https://www.dermis.net/bilder/CD016/550px/img0024.jpg>  
<https://www.dermis.net/bilder/CD071/550px/img0083.jpg>  
<https://www.dermis.net/bilder/CD071/550px/img0084.jpg>  
<https://www.dermis.net/bilder/CD071/550px/img0085.jpg>  
<https://www.dermis.net/bilder/CD070/550px/img0024.jpg>  
<https://www.dermis.net/bilder/CD070/550px/img0025.jpg>  
<https://www.dermis.net/bilder/CD071/550px/img0098.jpg>  
<https://www.dermis.net/bilder/CD071/550px/img0080.jpg>  
<https://www.dermis.net/bilder/CD071/550px/img0082.jpg>  
<https://www.dermis.net/bilder/CD070/550px/img0031.jpg>  
<https://www.dermis.net/bilder/CD071/550px/img0100.jpg>  
<https://www.dermis.net/bilder/CD070/550px/img0030.jpg>  
<https://www.dermis.net/bilder/CD071/550px/img0070.jpg>  
<https://www.dermis.net/bilder/CD071/550px/img0027.jpg>  
<https://www.dermis.net/bilder/CD071/550px/img0026.jpg>  
<https://www.dermis.net/bilder/CD014/550px/img0050.jpg>  
<https://www.dermis.net/bilder/CD071/550px/img0060.jpg>  
<https://www.dermis.net/bilder/CD071/550px/img0061.jpg>  
<https://www.dermis.net/bilder/CD004/550px/img0028.jpg>  
<https://www.dermis.net/bilder/CD071/550px/img0096.jpg>  
<https://www.dermis.net/bilder/CD071/550px/img0095.jpg>  
<https://www.dermis.net/bilder/CD071/550px/img0111.jpg>  
<https://www.dermis.net/bilder/CD057/550px/img0016.jpg>  
<https://www.dermis.net/bilder/CD071/550px/img0046.jpg>  
<https://www.dermis.net/bilder/CD018/550px/img0026.jpg>  
<https://www.dermis.net/bilder/CD049/550px/img0085.jpg>  
<https://www.dermis.net/bilder/CD018/550px/img0110.jpg>  
<https://www.dermis.net/bilder/CD071/550px/img0109.jpg>  
<https://www.dermis.net/bilder/CD069/550px/img0079.jpg>  
<https://www.dermis.net/bilder/CD071/550px/img0071.jpg>  
<https://www.dermis.net/bilder/CD071/550px/img0040.jpg>  
<https://www.dermis.net/bilder/CD014/550px/img0052.jpg>  
<https://www.dermis.net/bilder/CD015/550px/img0033.jpg>  
<https://www.dermis.net/bilder/CD051/550px/img0041.jpg>  
<https://www.dermis.net/bilder/CD037/550px/img0067.jpg>  
<https://www.dermis.net/bilder/CD037/550px/img0068.jpg>  
<https://www.dermis.net/bilder/CD037/550px/img0069.jpg>  
<https://www.dermis.net/bilder/CD070/550px/img0004.jpg>  
<https://www.dermis.net/bilder/CD018/550px/img0063.jpg>  
<https://www.dermis.net/bilder/CD014/550px/img0077.jpg>  
<https://www.dermis.net/bilder/CD071/550px/img0106.jpg>  
<https://www.dermis.net/bilder/CD018/550px/img0033.jpg>  
<https://www.dermis.net/bilder/CD055/550px/img0094.jpg>  
<https://www.dermis.net/bilder/CD021/550px/img0084.jpg>  
<https://www.dermis.net/bilder/CD069/550px/img0006.jpg>  
<https://www.dermis.net/bilder/CD070/550px/img0095.jpg>

<https://www.dermis.net/bilder/CD026/550px/img0098.jpg>  
<https://www.dermis.net/bilder/CD070/550px/img0001.jpg>  
<https://www.dermis.net/bilder/CD026/550px/img0100.jpg>  
<https://www.dermis.net/bilder/CD032/550px/img0051.jpg>  
<https://www.dermis.net/bilder/CD032/550px/img0052.jpg>  
<https://www.dermis.net/bilder/CD071/550px/img0090.jpg>  
<https://www.dermis.net/bilder/CD054/550px/img0049.jpg>  
<https://www.dermis.net/bilder/CD052/550px/img0064.jpg>  
<https://www.dermis.net/bilder/CD054/550px/img0048.jpg>  
<https://www.dermis.net/bilder/CD071/550px/img0089.jpg>  
<https://www.dermis.net/bilder/CD071/550px/img0091.jpg>  
<https://www.dermis.net/bilder/CD001/550px/img0085.jpg>  
<https://www.dermis.net/bilder/CD037/550px/img0057.jpg>  
<https://www.dermis.net/bilder/CD069/550px/img0049.jpg>  
<https://www.dermis.net/bilder/CD070/550px/img0006.jpg>  
<https://www.dermis.net/bilder/CD018/550px/img0050.jpg>  
<https://www.dermis.net/bilder/CD071/550px/img0078.jpg>  
<https://www.dermis.net/bilder/CD050/550px/img0019.jpg>  
<https://www.dermis.net/bilder/CD050/550px/img0020.jpg>  
<https://www.dermis.net/bilder/CD071/550px/img0112.jpg>  
<https://www.dermis.net/bilder/CD036/550px/img0099.jpg>  
<https://www.dermis.net/bilder/CD014/550px/img0081.jpg>  
<https://www.dermis.net/bilder/CD014/550px/img0082.jpg>  
<https://www.dermis.net/bilder/CD040/550px/img0052.jpg>  
<https://www.dermis.net/bilder/CD071/550px/img0054.jpg>  
<https://www.dermis.net/bilder/CD025/550px/img0094.jpg>  
<https://www.dermis.net/bilder/CD071/550px/img0107.jpg>  
<https://www.dermis.net/bilder/CD069/550px/img0041.jpg>  
<https://www.dermis.net/bilder/CD069/550px/img0040.jpg>  
<https://www.dermis.net/bilder/CD003/550px/img0064.jpg>  
<https://www.dermis.net/bilder/CD016/550px/img0009.jpg>  
<https://www.dermis.net/bilder/CD071/550px/img0105.jpg>  
<https://www.dermis.net/bilder/CD071/550px/img0086.jpg>  
<https://www.dermis.net/bilder/CD071/550px/img0087.jpg>  
<https://www.dermis.net/bilder/CD018/550px/img0064.jpg>  
<https://www.dermis.net/bilder/CD016/550px/img0055.jpg>  
<https://www.dermis.net/bilder/CD050/550px/img0092.jpg>  
<https://www.dermis.net/bilder/CD020/550px/img0045.jpg>  
<https://www.dermis.net/bilder/CD056/550px/img0037.jpg>  
<https://www.dermis.net/bilder/CD056/550px/img0038.jpg>  
<https://www.dermis.net/bilder/CD018/550px/img0053.jpg>  
<https://www.dermis.net/bilder/CD001/550px/img0068.jpg>  
<https://www.dermis.net/bilder/CD047/550px/img0032.jpg>  
<https://www.dermis.net/bilder/CD071/550px/img0007.jpg>  
<https://www.dermis.net/bilder/CD003/550px/img0081.jpg>  
<https://www.dermis.net/bilder/CD070/550px/img0032.jpg>  
<https://www.dermis.net/bilder/CD014/550px/img0040.jpg>  
<https://www.dermis.net/bilder/CD071/550px/img0094.jpg>

<https://www.dermis.net/bilder/CD073/550px/img0009.jpg>  
<https://www.dermis.net/bilder/CD050/550px/img0068.jpg>  
<https://www.dermis.net/bilder/CD048/550px/img0050.jpg>  
<https://www.dermis.net/bilder/CD008/550px/img0041.jpg>  
<https://www.dermis.net/bilder/CD024/550px/img0017.jpg>  
<https://www.dermis.net/bilder/CD071/550px/img0051.jpg>  
<https://www.dermis.net/bilder/CD071/550px/img0062.jpg>  
<https://www.dermis.net/bilder/CD071/550px/img0042.jpg>  
<https://www.dermis.net/bilder/CD014/550px/img0047.jpg>  
<https://www.dermis.net/bilder/CD071/550px/img0043.jpg>  
<https://www.dermis.net/bilder/CD015/550px/img0026.jpg>  
<https://www.dermis.net/bilder/CD005/550px/img0066.jpg>  
<https://www.dermis.net/bilder/CD046/550px/img0013.jpg>  
<https://www.dermis.net/bilder/CD046/550px/img0020.jpg>  
<https://www.dermis.net/bilder/CD005/550px/img0065.jpg>  
<https://www.dermis.net/bilder/CD071/550px/img0077.jpg>  
<https://www.dermis.net/bilder/CD036/550px/img0105.jpg>  
<https://www.dermis.net/bilder/CD071/550px/img0103.jpg>  
<https://www.dermis.net/bilder/CD036/550px/img0090.jpg>  
<https://www.dermis.net/bilder/CD014/550px/img0080.jpg>  
<https://www.dermis.net/bilder/CD015/550px/img0031.jpg>  
<https://www.dermis.net/bilder/CD014/550px/img0076.jpg>  
<https://www.dermis.net/bilder/CD041/550px/img0076.jpg>  
<https://www.dermis.net/bilder/CD001/550px/img0009.jpg>  
<https://www.dermis.net/bilder/CD056/550px/img0031.jpg>  
<https://www.dermis.net/bilder/CD071/550px/img0088.jpg>  
<https://www.dermis.net/bilder/CD014/550px/img0057.jpg>  
<https://www.dermis.net/bilder/CD036/550px/img0086.jpg>  
<https://www.dermis.net/bilder/CD046/550px/img0079.jpg>  
<https://www.dermis.net/bilder/CD046/550px/img0080.jpg>  
<https://www.dermis.net/bilder/CD071/550px/img0075.jpg>  
<https://www.dermis.net/bilder/CD071/550px/img0076.jpg>  
<https://www.dermis.net/bilder/CD071/550px/img0101.jpg>  
<https://www.dermis.net/bilder/CD071/550px/img0102.jpg>  
<https://www.dermis.net/bilder/CD028/550px/img0079.jpg>  
<https://www.dermis.net/bilder/CD020/550px/img0074.jpg>  
<https://www.dermis.net/bilder/CD020/550px/img0075.jpg>  
<https://www.dermis.net/bilder/CD020/550px/img0072.jpg>  
<https://www.dermis.net/bilder/CD020/550px/img0073.jpg>  
<https://www.dermis.net/bilder/CD069/550px/img0044.jpg>  
<https://www.dermis.net/bilder/CD069/550px/img0045.jpg>  
<https://www.dermis.net/bilder/CD048/550px/img0083.jpg>  
<https://www.dermis.net/bilder/CD001/550px/img0054.jpg>  
<https://www.dermis.net/bilder/CD021/550px/img0076.jpg>  
<https://www.dermis.net/bilder/CD023/550px/img0055.jpg>  
<https://www.dermis.net/bilder/CD023/550px/img0056.jpg>  
<https://www.dermis.net/bilder/CD006/550px/img0055.jpg>  
<https://www.dermis.net/bilder/CD005/550px/img0040.jpg>



<https://www.dermis.net/bilder/CD023/550px/img0057.jpg>  
<https://www.dermis.net/bilder/CD018/550px/img0102.jpg>  
<https://www.dermis.net/bilder/CD004/550px/img0032.jpg>  
<https://www.dermis.net/bilder/CD001/550px/img0004.jpg>  
<https://www.dermis.net/bilder/CD018/550px/img0057.jpg>  
<https://www.dermis.net/bilder/CD052/550px/img0100.jpg>  
<https://www.dermis.net/bilder/CD006/550px/img0036.jpg>  
<https://www.dermis.net/bilder/CD024/550px/img0007.jpg>  
<https://www.dermis.net/bilder/CD024/550px/img0008.jpg>  
<https://www.dermis.net/bilder/CD019/550px/img0005.jpg>  
<https://www.dermis.net/bilder/CD071/550px/img0079.jpg>  
<https://www.dermis.net/bilder/CD054/550px/img0100.jpg>  
<https://www.dermis.net/bilder/CD016/550px/img0010.jpg>  
<https://www.dermis.net/bilder/CD056/550px/img0036.jpg>  
<https://www.dermis.net/bilder/CD012/550px/img0084.jpg>  
<https://www.dermis.net/bilder/CD027/550px/img0078.jpg>  
<https://www.dermis.net/bilder/CD036/550px/img0104.jpg>  
<https://www.dermis.net/bilder/CD071/550px/img0104.jpg>  
<https://www.dermis.net/bilder/CD027/550px/img0079.jpg>  
<https://www.dermis.net/bilder/CD027/550px/img0080.jpg>  
<https://www.dermis.net/bilder/CD070/550px/img0081.jpg>  
<https://www.dermis.net/bilder/CD070/550px/img0082.jpg>  
<https://www.dermis.net/bilder/CD048/550px/img0081.jpg>  
<https://www.dermis.net/bilder/CD048/550px/img0082.jpg>  
<https://www.dermis.net/bilder/CD021/550px/img0067.jpg>  
<https://www.dermis.net/bilder/CD008/550px/img0063.jpg>  
<https://www.dermis.net/bilder/CD014/550px/img0038.jpg>  
<https://www.dermis.net/bilder/CD014/550px/img0048.jpg>  
<https://www.dermis.net/bilder/CD034/550px/img0040.jpg>  
<https://www.dermis.net/bilder/CD071/550px/img0058.jpg>  
<https://www.dermis.net/bilder/CD040/550px/img0083.jpg>  
<https://www.dermis.net/bilder/CD071/550px/img0059.jpg>  
<https://www.dermis.net/bilder/CD049/550px/img0024.jpg>  
<https://www.dermis.net/bilder/CD015/550px/img0046.jpg>  
<https://www.dermis.net/bilder/CD033/550px/img0078.jpg>  
<https://www.dermis.net/bilder/CD006/550px/img0031.jpg>  
<https://www.dermis.net/bilder/CD035/550px/img0058.jpg>  
<https://www.dermis.net/bilder/CD035/550px/img0059.jpg>  
<https://www.dermis.net/bilder/CD039/550px/img0007.jpg>  
<https://www.dermis.net/bilder/CD049/550px/img0038.jpg>  
<https://www.dermis.net/bilder/CD049/550px/img0039.jpg>  
<https://www.dermis.net/bilder/CD035/550px/img0089.jpg>  
<https://www.dermis.net/bilder/CD037/550px/img0028.jpg>  
<https://www.dermis.net/bilder/CD058/550px/img0017.jpg>  
<https://www.dermis.net/bilder/CD058/550px/img0018.jpg>  
<https://www.dermis.net/bilder/CD041/550px/img0004.jpg>  
<https://www.dermis.net/bilder/CD041/550px/img0005.jpg>  
<https://www.dermis.net/bilder/CD041/550px/img0006.jpg>

<https://www.dermis.net/bilder/CD039/550px/img0010.jpg>  
<https://www.dermis.net/bilder/CD004/550px/img0016.jpg>  
<https://www.dermis.net/bilder/CD004/550px/img0017.jpg>  
<https://www.dermis.net/bilder/CD025/550px/img0040.jpg>  
<https://www.dermis.net/bilder/CD049/550px/img0040.jpg>  
<https://www.dermis.net/bilder/CD049/550px/img0041.jpg>  
<https://www.dermis.net/bilder/CD016/550px/img0014.jpg>  
<https://www.dermis.net/bilder/CD006/550px/img0079.jpg>  
<https://www.dermis.net/bilder/CD026/550px/img0052.jpg>  
<https://www.dermis.net/bilder/CD014/550px/img0075.jpg>  
<https://www.dermis.net/bilder/CD026/550px/img0051.jpg>  
<https://www.dermis.net/bilder/CD071/550px/img0114.jpg>  
<https://www.dermis.net/bilder/CD071/550px/img0115.jpg>  
<https://www.dermis.net/bilder/CD023/550px/img0048.jpg>  
<https://www.dermis.net/bilder/CD071/550px/img0022.jpg>  
<https://www.dermis.net/bilder/CD071/550px/img0041.jpg>  
<https://www.dermis.net/bilder/CD016/550px/img0006.jpg>  
<https://www.dermis.net/bilder/CD055/550px/img0085.jpg>  
<https://www.dermis.net/bilder/CD051/550px/img0058.jpg>  
<https://www.dermis.net/bilder/CD037/550px/img0031.jpg>  
<https://www.dermis.net/bilder/CD048/550px/img0090.jpg>  
<https://www.dermis.net/bilder/CD048/550px/img0091.jpg>  
<https://www.dermis.net/bilder/CD036/550px/img0058.jpg>  
<https://www.dermis.net/bilder/CD049/550px/img0025.jpg>  
<https://www.dermis.net/bilder/CD049/550px/img0026.jpg>  
<https://www.dermis.net/bilder/CD049/550px/img0027.jpg>  
<https://www.dermis.net/bilder/CD049/550px/img0028.jpg>  
<https://www.dermis.net/bilder/CD049/550px/img0031.jpg>  
<https://www.dermis.net/bilder/CD049/550px/img0032.jpg>  
<https://www.dermis.net/bilder/CD049/550px/img0033.jpg>  
<https://www.dermis.net/bilder/CD049/550px/img0034.jpg>  
<https://www.dermis.net/bilder/CD049/550px/img0035.jpg>  
<https://www.dermis.net/bilder/CD049/550px/img0036.jpg>  
<https://www.dermis.net/bilder/CD049/550px/img0037.jpg>  
<https://www.dermis.net/bilder/CD050/550px/img0043.jpg>  
<https://www.dermis.net/bilder/CD050/550px/img0042.jpg>  
<https://www.dermis.net/bilder/CD001/550px/img0067.jpg>  
<https://www.dermis.net/bilder/CD006/550px/img0099.jpg>  
<https://www.dermis.net/bilder/CD036/550px/img0037.jpg>  
<https://www.dermis.net/bilder/CD005/550px/img0080.jpg>  
<https://www.dermis.net/bilder/CD020/550px/img0091.jpg>  
<https://www.dermis.net/bilder/CD002/550px/img0083.jpg>  
<https://www.dermis.net/bilder/CD005/550px/img0016.jpg>  
<https://www.dermis.net/bilder/CD002/550px/img0084.jpg>  
<https://www.dermis.net/bilder/CD048/550px/img0077.jpg>  
<https://www.dermis.net/bilder/CD048/550px/img0078.jpg>  
<https://www.dermis.net/bilder/CD023/550px/img0016.jpg>  
<https://www.dermis.net/bilder/CD036/550px/img0039.jpg>

<https://www.dermis.net/bilder/CD024/550px/img0013.jpg>  
<https://www.dermis.net/bilder/CD036/550px/img0102.jpg>  
<https://www.dermis.net/bilder/CD034/550px/img0036.jpg>  
<https://www.dermis.net/bilder/CD027/550px/img0095.jpg>  
<https://www.dermis.net/bilder/CD049/550px/img0092.jpg>  
<https://www.dermis.net/bilder/CD015/550px/img0024.jpg>  
<https://www.dermis.net/bilder/CD034/550px/img0002.jpg>  
<https://www.dermis.net/bilder/CD018/550px/img0079.jpg>  
<https://www.dermis.net/bilder/CD018/550px/img0038.jpg>  
<https://www.dermis.net/bilder/CD027/550px/img0096.jpg>  
<https://www.dermis.net/bilder/CD024/550px/img0014.jpg>  
<https://www.dermis.net/bilder/CD026/550px/img0040.jpg>  
<https://www.dermis.net/bilder/CD028/550px/img0047.jpg>  
<https://www.dermis.net/bilder/CD028/550px/img0048.jpg>  
<https://www.dermis.net/bilder/CD028/550px/img0049.jpg>  
<https://www.dermis.net/bilder/CD028/550px/img0050.jpg>  
<https://www.dermis.net/bilder/CD071/550px/img0074.jpg>  
<https://www.dermis.net/bilder/CD034/550px/img0001.jpg>  
<https://www.dermis.net/bilder/CD037/550px/img0026.jpg>  
<https://www.dermis.net/bilder/CD024/550px/img0089.jpg>  
<https://www.dermis.net/bilder/CD026/550px/img0059.jpg>  
<https://www.dermis.net/bilder/CD026/550px/img0058.jpg>  
<https://www.dermis.net/bilder/CD026/550px/img0060.jpg>  
<https://www.dermis.net/bilder/CD050/550px/img0076.jpg>  
<https://www.dermis.net/bilder/CD037/550px/img0027.jpg>  
<https://www.dermis.net/bilder/CD018/550px/img0112.jpg>  
<https://www.dermis.net/bilder/CD037/550px/img0025.jpg>  
<https://www.dermis.net/bilder/CD021/550px/img0093.jpg>  
<https://www.dermis.net/bilder/CD015/550px/img0044.jpg>  
<https://www.dermis.net/bilder/CD016/550px/img0013.jpg>  
<https://www.dermis.net/bilder/CD016/550px/img0047.jpg>  
<https://www.dermis.net/bilder/CD054/550px/img0092.jpg>  
<https://www.dermis.net/bilder/CD005/550px/img0034.jpg>  
<https://www.dermis.net/bilder/CD032/550px/img0092.jpg>  
<https://www.dermis.net/bilder/CD046/550px/img0040.jpg>  
<https://www.dermis.net/bilder/CD032/550px/img0093.jpg>  
<https://www.dermis.net/bilder/CD002/550px/img0011.jpg>  
<https://www.dermis.net/bilder/CD034/550px/img0100.jpg>  
<https://www.dermis.net/bilder/CD046/550px/img0033.jpg>  
<https://www.dermis.net/bilder/CD032/550px/img0100.jpg>  
<https://www.dermis.net/bilder/CD046/550px/img0034.jpg>  
<https://www.dermis.net/bilder/CD015/550px/img0029.jpg>  
<https://www.dermis.net/bilder/CD025/550px/img0077.jpg>  
<https://www.dermis.net/bilder/CD042/550px/img0028.jpg>  
<https://www.dermis.net/bilder/CD026/550px/img0047.jpg>  
<https://www.dermis.net/bilder/CD026/550px/img0048.jpg>  
<https://www.dermis.net/bilder/CD014/550px/img0049.jpg>  
<https://www.dermis.net/bilder/CD047/550px/img0049.jpg>

<https://www.dermis.net/bilder/CD049/550px/img0084.jpg>  
<https://www.dermis.net/bilder/CD047/550px/img0050.jpg>  
<https://www.dermis.net/bilder/CD047/550px/img0051.jpg>  
<https://www.dermis.net/bilder/CD047/550px/img0052.jpg>  
<https://www.dermis.net/bilder/CD049/550px/img0076.jpg>  
<https://www.dermis.net/bilder/CD047/550px/img0018.jpg>  
<https://www.dermis.net/bilder/CD039/550px/img0082.jpg>  
<https://www.dermis.net/bilder/CD037/550px/img0040.jpg>  
<https://www.dermis.net/bilder/CD026/550px/img0075.jpg>  
<https://www.dermis.net/bilder/CD058/550px/img0063.jpg>  
<https://www.dermis.net/bilder/CD036/550px/img0056.jpg>  
<https://www.dermis.net/bilder/CD058/550px/img0061.jpg>  
<https://www.dermis.net/bilder/CD058/550px/img0062.jpg>  
<https://www.dermis.net/bilder/CD015/550px/img0032.jpg>  
<https://www.dermis.net/bilder/CD040/550px/img0050.jpg>  
<https://www.dermis.net/bilder/CD050/550px/img0101.jpg>  
<https://www.dermis.net/bilder/CD032/550px/img0060.jpg>  
<https://www.dermis.net/bilder/CD050/550px/img0102.jpg>  
<https://www.dermis.net/bilder/CD050/550px/img0100.jpg>  
<https://www.dermis.net/bilder/CD025/550px/img0026.jpg>  
<https://www.dermis.net/bilder/CD025/550px/img0027.jpg>  
<https://www.dermis.net/bilder/CD025/550px/img0028.jpg>  
<https://www.dermis.net/bilder/CD049/550px/img0088.jpg>  
<https://www.dermis.net/bilder/CD027/550px/img0066.jpg>  
<https://www.dermis.net/bilder/CD046/550px/img0095.jpg>  
<https://www.dermis.net/bilder/CD046/550px/img0096.jpg>  
<https://www.dermis.net/bilder/CD054/550px/img0045.jpg>  
<https://www.dermis.net/bilder/CD016/550px/img0016.jpg>  
<https://www.dermis.net/bilder/CD018/550px/img0032.jpg>  
<https://www.dermis.net/bilder/CD020/550px/img0052.jpg>  
<https://www.dermis.net/bilder/CD018/550px/img0090.jpg>  
<https://www.dermis.net/bilder/CD035/550px/img0004.jpg>  
<https://www.dermis.net/bilder/CD035/550px/img0008.jpg>  
<https://www.dermis.net/bilder/CD007/550px/img0029.jpg>  
<https://www.dermis.net/bilder/CD015/550px/img0030.jpg>  
<https://www.dermis.net/bilder/CD006/550px/img0040.jpg>  
<https://www.dermis.net/bilder/CD044/550px/img0012.jpg>  
<https://www.dermis.net/bilder/CD040/550px/img0073.jpg>  
<https://www.dermis.net/bilder/CD035/550px/img0002.jpg>  
<https://www.dermis.net/bilder/CD015/550px/img0036.jpg>  
<https://www.dermis.net/bilder/CD049/550px/img0090.jpg>  
<https://www.dermis.net/bilder/CD049/550px/img0091.jpg>  
<https://www.dermis.net/bilder/CD024/550px/img0021.jpg>  
<https://www.dermis.net/bilder/CD046/550px/img0052.jpg>  
<https://www.dermis.net/bilder/CD023/550px/img0023.jpg>  
<https://www.dermis.net/bilder/CD023/550px/img0024.jpg>  
<https://www.dermis.net/bilder/CD023/550px/img0026.jpg>  
<https://www.dermis.net/bilder/CD023/550px/img0027.jpg>

<https://www.dermis.net/bilder/CD023/550px/img0028.jpg>  
<https://www.dermis.net/bilder/CD023/550px/img0025.jpg>  
<https://www.dermis.net/bilder/CD023/550px/img0029.jpg>  
<https://www.dermis.net/bilder/CD019/550px/img0009.jpg>  
<https://www.dermis.net/bilder/CD025/550px/img0031.jpg>  
<https://www.dermis.net/bilder/CD015/550px/img0047.jpg>  
<https://www.dermis.net/bilder/CD047/550px/img0009.jpg>  
<https://www.dermis.net/bilder/CD048/550px/img0058.jpg>  
<https://www.dermis.net/bilder/CD048/550px/img0059.jpg>  
<https://www.dermis.net/bilder/CD025/550px/img0030.jpg>  
<https://www.dermis.net/bilder/CD049/550px/img0055.jpg>  
<https://www.dermis.net/bilder/CD049/550px/img0056.jpg>  
<https://www.dermis.net/bilder/CD025/550px/img0033.jpg>  
<https://www.dermis.net/bilder/CD036/550px/img0106.jpg>  
<https://www.dermis.net/bilder/CD015/550px/img0023.jpg>  
<https://www.dermis.net/bilder/CD036/550px/img0019.jpg>  
<https://www.dermis.net/bilder/CD020/550px/img0054.jpg>  
<https://www.dermis.net/bilder/CD020/550px/img0055.jpg>  
<https://www.dermis.net/bilder/CD020/550px/img0058.jpg>  
<https://www.dermis.net/bilder/CD020/550px/img0053.jpg>  
<https://www.dermis.net/bilder/CD047/550px/img0085.jpg>  
<https://www.dermis.net/bilder/CD047/550px/img0086.jpg>  
<https://www.dermis.net/bilder/CD007/550px/img0009.jpg>  
<https://www.dermis.net/bilder/CD046/550px/img0025.jpg>  
<https://www.dermis.net/bilder/CD046/550px/img0026.jpg>  
<https://www.dermis.net/bilder/CD044/550px/img0047.jpg>  
<https://www.dermis.net/bilder/CD048/550px/img0080.jpg>  
<https://www.dermis.net/bilder/CD046/550px/img0027.jpg>  
<https://www.dermis.net/bilder/CD046/550px/img0028.jpg>  
<https://www.dermis.net/bilder/CD036/550px/img0062.jpg>  
<https://www.dermis.net/bilder/CD051/550px/img0105.jpg>  
<https://www.dermis.net/bilder/CD007/550px/img0048.jpg>  
<https://www.dermis.net/bilder/CD044/550px/img0019.jpg>  
<https://www.dermis.net/bilder/CD024/550px/img0048.jpg>  
<https://www.dermis.net/bilder/CD049/550px/img0053.jpg>  
<https://www.dermis.net/bilder/CD047/550px/img0022.jpg>  
<https://www.dermis.net/bilder/CD004/550px/img0014.jpg>  
<https://www.dermis.net/bilder/CD016/550px/img0017.jpg>  
<https://www.dermis.net/bilder/CD002/550px/img0035.jpg>  
<https://www.dermis.net/bilder/CD046/550px/img0077.jpg>  
<https://www.dermis.net/bilder/CD046/550px/img0078.jpg>  
<https://www.dermis.net/bilder/CD007/550px/img0038.jpg>  
<https://www.dermis.net/bilder/CD040/550px/img0082.jpg>  
<https://www.dermis.net/bilder/CD032/550px/img0013.jpg>  
<https://www.dermis.net/bilder/CD032/550px/img0014.jpg>  
<https://www.dermis.net/bilder/CD032/550px/img0018.jpg>  
<https://www.dermis.net/bilder/CD035/550px/img0037.jpg>  
<https://www.dermis.net/bilder/CD035/550px/img0036.jpg>

<https://www.dermis.net/bilder/CD007/550px/img0037.jpg>  
<https://www.dermis.net/bilder/CD026/550px/img0087.jpg>  
<https://www.dermis.net/bilder/CD039/550px/img0100.jpg>  
<https://www.dermis.net/bilder/CD039/550px/img0054.jpg>  
<https://www.dermis.net/bilder/CD044/550px/img0048.jpg>  
<https://www.dermis.net/bilder/CD016/550px/img0018.jpg>  
<https://www.dermis.net/bilder/CD020/550px/img0019.jpg>  
<https://www.dermis.net/bilder/CD025/550px/img0100.jpg>  
<https://www.dermis.net/bilder/CD020/550px/img0020.jpg>  
<https://www.dermis.net/bilder/CD035/550px/img0021.jpg>  
<https://www.dermis.net/bilder/CD021/550px/img0079.jpg>  
<https://www.dermis.net/bilder/CD024/550px/img0015.jpg>  
<https://www.dermis.net/bilder/CD048/550px/img0101.jpg>  
<https://www.dermis.net/bilder/CD025/550px/img0041.jpg>  
<https://www.dermis.net/bilder/CD032/550px/img0073.jpg>  
<https://www.dermis.net/bilder/CD032/550px/img0074.jpg>  
<https://www.dermis.net/bilder/CD032/550px/img0091.jpg>  
<https://www.dermis.net/bilder/CD046/550px/img0029.jpg>  
<https://www.dermis.net/bilder/CD046/550px/img0036.jpg>  
<https://www.dermis.net/bilder/CD049/550px/img0074.jpg>  
<https://www.dermis.net/bilder/CD033/550px/img0081.jpg>  
<https://www.dermis.net/bilder/CD026/550px/img0019.jpg>  
<https://www.dermis.net/bilder/CD014/550px/img0013.jpg>  
<https://www.dermis.net/bilder/CD023/550px/img0042.jpg>  
<https://www.dermis.net/bilder/CD023/550px/img0043.jpg>  
<https://www.dermis.net/bilder/CD026/550px/img0018.jpg>  
<https://www.dermis.net/bilder/CD027/550px/img0008.jpg>  
<https://www.dermis.net/bilder/CD046/550px/img0069.jpg>  
<https://www.dermis.net/bilder/CD002/550px/img0037.jpg>  
<https://www.dermis.net/bilder/CD046/550px/img0070.jpg>  
<https://www.dermis.net/bilder/CD023/550px/img0041.jpg>  
<https://www.dermis.net/bilder/CD046/550px/img0098.jpg>  
<https://www.dermis.net/bilder/CD058/550px/img0053.jpg>  
<https://www.dermis.net/bilder/CD058/550px/img0059.jpg>  
<https://www.dermis.net/bilder/CD015/550px/img0008.jpg>  
<https://www.dermis.net/bilder/CD003/550px/img0012.jpg>  
<https://www.dermis.net/bilder/CD049/550px/img0078.jpg>  
<https://www.dermis.net/bilder/CD023/550px/img0018.jpg>  
<https://www.dermis.net/bilder/CD044/550px/img0053.jpg>  
<https://www.dermis.net/bilder/CD037/550px/img0021.jpg>  
<https://www.dermis.net/bilder/CD024/550px/img0010.jpg>  
<https://www.dermis.net/bilder/CD036/550px/img0012.jpg>  
<https://www.dermis.net/bilder/CD006/550px/img0064.jpg>  
<https://www.dermis.net/bilder/CD047/550px/img0008.jpg>  
<https://www.dermis.net/bilder/CD023/550px/img0014.jpg>  
<https://www.dermis.net/bilder/CD023/550px/img0015.jpg>  
<https://www.dermis.net/bilder/CD048/550px/img0092.jpg>  
<https://www.dermis.net/bilder/CD018/550px/img0034.jpg>

<https://www.dermis.net/bilder/CD018/550px/img0029.jpg>  
<https://www.dermis.net/bilder/CD023/550px/img0077.jpg>  
<https://www.dermis.net/bilder/CD071/550px/img0065.jpg>  
<https://www.dermis.net/bilder/CD023/550px/img0078.jpg>  
<https://www.dermis.net/bilder/CD023/550px/img0079.jpg>  
<https://www.dermis.net/bilder/CD035/550px/img0062.jpg>  
<https://www.dermis.net/bilder/CD035/550px/img0063.jpg>  
<https://www.dermis.net/bilder/CD007/550px/img0011.jpg>  
<https://www.dermis.net/bilder/CD047/550px/img0090.jpg>  
<https://www.dermis.net/bilder/CD052/550px/img0030.jpg>  
<https://www.dermis.net/bilder/CD052/550px/img0062.jpg>  
<https://www.dermis.net/bilder/CD040/550px/img0021.jpg>  
<https://www.dermis.net/bilder/CD036/550px/img0083.jpg>  
<https://www.dermis.net/bilder/CD018/550px/img0030.jpg>  
<https://www.dermis.net/bilder/CD002/550px/img0032.jpg>  
<https://www.dermis.net/bilder/CD046/550px/img0021.jpg>  
<https://www.dermis.net/bilder/CD032/550px/img0085.jpg>  
<https://www.dermis.net/bilder/CD032/550px/img0087.jpg>  
<https://www.dermis.net/bilder/CD032/550px/img0076.jpg>  
<https://www.dermis.net/bilder/CD024/550px/img0003.jpg>  
<https://www.dermis.net/bilder/CD025/550px/img0093.jpg>  
<https://www.dermis.net/bilder/CD039/550px/img0003.jpg>  
<https://www.dermis.net/bilder/CD032/550px/img0025.jpg>  
<https://www.dermis.net/bilder/CD032/550px/img0029.jpg>  
<https://www.dermis.net/bilder/CD032/550px/img0030.jpg>  
<https://www.dermis.net/bilder/CD057/550px/img0040.jpg>  
<https://www.dermis.net/bilder/CD054/550px/img0046.jpg>  
<https://www.dermis.net/bilder/CD032/550px/img0024.jpg>  
<https://www.dermis.net/bilder/CD027/550px/img0084.jpg>  
<https://www.dermis.net/bilder/CD023/550px/img0074.jpg>  
<https://www.dermis.net/bilder/CD027/550px/img0004.jpg>  
<https://www.dermis.net/bilder/CD048/550px/img0097.jpg>  
<https://www.dermis.net/bilder/CD037/550px/img0020.jpg>  
<https://www.dermis.net/bilder/CD057/550px/img0001.jpg>  
<https://www.dermis.net/bilder/CD023/550px/img0094.jpg>  
<https://www.dermis.net/bilder/CD023/550px/img0095.jpg>  
<https://www.dermis.net/bilder/CD040/550px/img0091.jpg>  
<https://www.dermis.net/bilder/CD047/550px/img0023.jpg>  
<https://www.dermis.net/bilder/CD047/550px/img0024.jpg>  
<https://www.dermis.net/bilder/CD047/550px/img0011.jpg>  
<https://www.dermis.net/bilder/CD014/550px/img0032.jpg>  
<https://www.dermis.net/bilder/CD042/550px/img0017.jpg>  
<https://www.dermis.net/bilder/CD042/550px/img0018.jpg>  
<https://www.dermis.net/bilder/CD006/550px/img0043.jpg>  
<https://www.dermis.net/bilder/CD039/550px/img0027.jpg>  
<https://www.dermis.net/bilder/CD032/550px/img0057.jpg>  
<https://www.dermis.net/bilder/CD032/550px/img0077.jpg>  
<https://www.dermis.net/bilder/CD020/550px/img0013.jpg>

<https://www.dermis.net/bilder/CD002/550px/img0063.jpg>  
<https://www.dermis.net/bilder/CD040/550px/img0101.jpg>  
<https://www.dermis.net/bilder/CD040/550px/img0102.jpg>  
<https://www.dermis.net/bilder/CD020/550px/img0012.jpg>  
<https://www.dermis.net/bilder/CD020/550px/img0014.jpg>  
<https://www.dermis.net/bilder/CD020/550px/img0015.jpg>  
<https://www.dermis.net/bilder/CD033/550px/img0089.jpg>  
<https://www.dermis.net/bilder/CD025/550px/img0075.jpg>  
<https://www.dermis.net/bilder/CD039/550px/img0075.jpg>  
<https://www.dermis.net/bilder/CD039/550px/img0074.jpg>  
<https://www.dermis.net/bilder/CD039/550px/img0076.jpg>  
<https://www.dermis.net/bilder/CD039/550px/img0077.jpg>  
<https://www.dermis.net/bilder/CD023/550px/img0090.jpg>  
<https://www.dermis.net/bilder/CD049/550px/img0089.jpg>  
<https://www.dermis.net/bilder/CD018/550px/img0082.jpg>  
<https://www.dermis.net/bilder/CD027/550px/img0100.jpg>  
<https://www.dermis.net/bilder/CD034/550px/img0082.jpg>  
<https://www.dermis.net/bilder/CD039/550px/img0017.jpg>  
<https://www.dermis.net/bilder/CD047/550px/img0012.jpg>  
<https://www.dermis.net/bilder/CD047/550px/img0013.jpg>  
<https://www.dermis.net/bilder/CD032/550px/img0079.jpg>  
<https://www.dermis.net/bilder/CD032/550px/img0080.jpg>  
<https://www.dermis.net/bilder/CD057/550px/img0032.jpg>  
<https://www.dermis.net/bilder/CD057/550px/img0019.jpg>  
<https://www.dermis.net/bilder/CD044/550px/img0018.jpg>  
<https://www.dermis.net/bilder/CD004/550px/img0009.jpg>  
<https://www.dermis.net/bilder/CD039/550px/img0047.jpg>  
<https://www.dermis.net/bilder/CD033/550px/img0074.jpg>  
<https://www.dermis.net/bilder/CD039/550px/img0048.jpg>  
<https://www.dermis.net/bilder/CD047/550px/img0062.jpg>  
<https://www.dermis.net/bilder/CD047/550px/img0063.jpg>  
<https://www.dermis.net/bilder/CD050/550px/img0045.jpg>  
<https://www.dermis.net/bilder/CD058/550px/img0097.jpg>  
<https://www.dermis.net/bilder/CD044/550px/img0033.jpg>  
<https://www.dermis.net/bilder/CD002/550px/img0051.jpg>  
<https://www.dermis.net/bilder/CD046/550px/img0097.jpg>  
<https://www.dermis.net/bilder/CD047/550px/img0072.jpg>  
<https://www.dermis.net/bilder/CD032/550px/img0097.jpg>  
<https://www.dermis.net/bilder/CD044/550px/img0070.jpg>  
<https://www.dermis.net/bilder/CD044/550px/img0071.jpg>  
<https://www.dermis.net/bilder/CD035/550px/img0042.jpg>  
<https://www.dermis.net/bilder/CD035/550px/img0043.jpg>  
<https://www.dermis.net/bilder/CD048/550px/img0075.jpg>  
<https://www.dermis.net/bilder/CD035/550px/img0044.jpg>  
<https://www.dermis.net/bilder/CD035/550px/img0045.jpg>  
<https://www.dermis.net/bilder/CD014/550px/img0083.jpg>  
<https://www.dermis.net/bilder/CD008/550px/img0045.jpg>  
<https://www.dermis.net/bilder/CD005/550px/img0051.jpg>



<https://www.dermis.net/bilder/CD026/550px/img0041.jpg>  
<https://www.dermis.net/bilder/CD046/550px/img0030.jpg>  
<https://www.dermis.net/bilder/CD046/550px/img0031.jpg>  
<https://www.dermis.net/bilder/CD016/550px/img0004.jpg>  
<https://www.dermis.net/bilder/CD005/550px/img0091.jpg>  
<https://www.dermis.net/bilder/CD039/550px/img0063.jpg>  
<https://www.dermis.net/bilder/CD039/550px/img0064.jpg>  
<https://www.dermis.net/bilder/CD039/550px/img0065.jpg>  
<https://www.dermis.net/bilder/CD018/550px/img0031.jpg>  
<https://www.dermis.net/bilder/CD039/550px/img0061.jpg>  
<https://www.dermis.net/bilder/CD039/550px/img0062.jpg>  
<https://www.dermis.net/bilder/CD052/550px/img0011.jpg>  
<https://www.dermis.net/bilder/CD018/550px/img0049.jpg>  
<https://www.dermis.net/bilder/CD006/550px/img0067.jpg>  
<https://www.dermis.net/bilder/CD034/550px/img0071.jpg>  
<https://www.dermis.net/bilder/CD046/550px/img0089.jpg>  
<https://www.dermis.net/bilder/CD046/550px/img0090.jpg>  
<https://www.dermis.net/bilder/CD057/550px/img0017.jpg>  
<https://www.dermis.net/bilder/CD026/550px/img0028.jpg>  
<https://www.dermis.net/bilder/CD026/550px/img0029.jpg>  
<https://www.dermis.net/bilder/CD005/550px/img0057.jpg>  
<https://www.dermis.net/bilder/CD020/550px/img0032.jpg>  
<https://www.dermis.net/bilder/CD020/550px/img0033.jpg>  
<https://www.dermis.net/bilder/CD023/550px/img0051.jpg>  
<https://www.dermis.net/bilder/CD023/550px/img0052.jpg>  
<https://www.dermis.net/bilder/CD033/550px/img0085.jpg>  
<https://www.dermis.net/bilder/CD025/550px/img0001.jpg>  
<https://www.dermis.net/bilder/CD023/550px/img0050.jpg>  
<https://www.dermis.net/bilder/CD033/550px/img0086.jpg>  
<https://www.dermis.net/bilder/CD037/550px/img0009.jpg>  
<https://www.dermis.net/bilder/CD007/550px/img0008.jpg>  
<https://www.dermis.net/bilder/CD042/550px/img0092.jpg>  
<https://www.dermis.net/bilder/CD037/550px/img0010.jpg>  
<https://www.dermis.net/bilder/CD039/550px/img0030.jpg>  
<https://www.dermis.net/bilder/CD033/550px/img0091.jpg>  
<https://www.dermis.net/bilder/CD033/550px/img0092.jpg>  
<https://www.dermis.net/bilder/CD034/550px/img0079.jpg>  
<https://www.dermis.net/bilder/CD034/550px/img0080.jpg>  
<https://www.dermis.net/bilder/CD052/550px/img0063.jpg>  
<https://www.dermis.net/bilder/CD057/550px/img0041.jpg>  
<https://www.dermis.net/bilder/CD046/550px/img0087.jpg>  
<https://www.dermis.net/bilder/CD049/550px/img0069.jpg>  
<https://www.dermis.net/bilder/CD049/550px/img0070.jpg>  
<https://www.dermis.net/bilder/CD046/550px/img0088.jpg>  
<https://www.dermis.net/bilder/CD046/550px/img0056.jpg>  
<https://www.dermis.net/bilder/CD005/550px/img0052.jpg>  
<https://www.dermis.net/bilder/CD035/550px/img0079.jpg>  
<https://www.dermis.net/bilder/CD036/550px/img0087.jpg>

<https://www.dermis.net/bilder/CD212/550px/img0026.jpg>  
<https://www.dermis.net/bilder/CD212/550px/img0027.jpg>  
<https://www.dermis.net/bilder/CD042/550px/img0087.jpg>  
<https://www.dermis.net/bilder/CD212/550px/img0021.jpg>  
<https://www.dermis.net/bilder/CD212/550px/img0022.jpg>  
<https://www.dermis.net/bilder/CD212/550px/img0018.jpg>  
<https://www.dermis.net/bilder/CD183/550px/img0044.jpg>  
<https://www.dermis.net/bilder/CD193/550px/img0020.jpg>  
<https://www.dermis.net/bilder/CD194/550px/img0102.jpg>  
<https://www.dermis.net/bilder/CD212/550px/img0003.jpg>  
<https://www.dermis.net/bilder/CD196/550px/img0035.jpg>  
<https://www.dermis.net/bilder/CD196/550px/img0037.jpg>  
<https://www.dermis.net/bilder/CD018/550px/img0023.jpg>  
<https://www.dermis.net/bilder/CD055/550px/img0069.jpg>  
<https://www.dermis.net/bilder/CD198/550px/img0112.jpg>  
<https://www.dermis.net/bilder/CD001/550px/img0081.jpg>  
<https://www.dermis.net/bilder/CD001/550px/img0082.jpg>  
<https://www.dermis.net/bilder/CD189/550px/img0100.jpg>  
<https://www.dermis.net/bilder/CD185/550px/img0016.jpg>  
<https://www.dermis.net/bilder/CD194/550px/img0103.jpg>  
<https://www.dermis.net/bilder/CD187/550px/img0016.jpg>  
<https://www.dermis.net/bilder/CD002/550px/img0013.jpg>  
<https://www.dermis.net/bilder/CD002/550px/img0038.jpg>  
<https://www.dermis.net/bilder/CD193/550px/img0018.jpg>  
<https://www.dermis.net/bilder/CD193/550px/img0019.jpg>  
<https://www.dermis.net/bilder/CD001/550px/img0044.jpg>  
<https://www.dermis.net/bilder/CD044/550px/img0041.jpg>  
<https://www.dermis.net/bilder/CD035/550px/img0087.jpg>  
<https://www.dermis.net/bilder/CD037/550px/img0029.jpg>  
<https://www.dermis.net/bilder/CD035/550px/img0065.jpg>  
<https://www.dermis.net/bilder/CD035/550px/img0066.jpg>  
<https://www.dermis.net/bilder/CD183/550px/img0085.jpg>  
<https://www.dermis.net/bilder/CD042/550px/img0054.jpg>  
<https://www.dermis.net/bilder/CD199/550px/img0036.jpg>  
<https://www.dermis.net/bilder/CD189/550px/img0045.jpg>  
<https://www.dermis.net/bilder/CD178/550px/img0040.jpg>  
<https://www.dermis.net/bilder/CD178/550px/img0041.jpg>  
<https://www.dermis.net/bilder/CD188/550px/img0001.jpg>  
<https://www.dermis.net/bilder/CD188/550px/img0002.jpg>  
<https://www.dermis.net/bilder/CD188/550px/img0003.jpg>  
<https://www.dermis.net/bilder/CD188/550px/img0004.jpg>  
<https://www.dermis.net/bilder/CD188/550px/img0005.jpg>  
<https://www.dermis.net/bilder/CD187/550px/img0075.jpg>  
<https://www.dermis.net/bilder/CD199/550px/img0029.jpg>  
<https://www.dermis.net/bilder/CD199/550px/img0128.jpg>  
<https://www.dermis.net/bilder/CD193/550px/img0096.jpg>  
<https://www.dermis.net/bilder/CD191/550px/img0043.jpg>  
<https://www.dermis.net/bilder/CD029/550px/img0015.jpg>

<https://www.dermis.net/bilder/CD180/550px/img0038.jpg>  
<https://www.dermis.net/bilder/CD041/550px/img0063.jpg>  
<https://www.dermis.net/bilder/CD002/550px/img0046.jpg>  
<https://www.dermis.net/bilder/CD002/550px/img0007.jpg>  
<https://www.dermis.net/bilder/CD002/550px/img0041.jpg>  
<https://www.dermis.net/bilder/CD002/550px/img0016.jpg>  
<https://www.dermis.net/bilder/CD002/550px/img0002.jpg>  
<https://www.dermis.net/bilder/CD002/550px/img0028.jpg>  
<https://www.dermis.net/bilder/CD002/550px/img0043.jpg>  
<https://www.dermis.net/bilder/CD027/550px/img0032.jpg>  
<https://www.dermis.net/bilder/CD195/550px/img0031.jpg>  
<https://www.dermis.net/bilder/CD212/550px/img0004.jpg>  
<https://www.dermis.net/bilder/CD195/550px/img0115.jpg>  
<https://www.dermis.net/bilder/CD195/550px/img0116.jpg>  
<https://www.dermis.net/bilder/CD198/550px/img0051.jpg>  
<https://www.dermis.net/bilder/CD179/550px/img0031.jpg>  
<https://www.dermis.net/bilder/CD183/550px/img0084.jpg>  
<https://www.dermis.net/bilder/CD193/550px/img0183.jpg>  
<https://www.dermis.net/bilder/CD193/550px/img0184.jpg>  
<https://www.dermis.net/bilder/CD196/550px/img0049.jpg>  
<https://www.dermis.net/bilder/CD196/550px/img0050.jpg>  
<https://www.dermis.net/bilder/CD197/550px/img0053.jpg>  
<https://www.dermis.net/bilder/CD212/550px/img0028.jpg>  
<https://www.dermis.net/bilder/CD192/550px/img0064.jpg>  
<https://www.dermis.net/bilder/CD192/550px/img0065.jpg>  
<https://www.dermis.net/bilder/CD058/550px/img0093.jpg>  
<https://www.dermis.net/bilder/CD006/550px/img0052.jpg>  
<https://www.dermis.net/bilder/CD057/550px/img0059.jpg>  
<https://www.dermis.net/bilder/CD189/550px/img0044.jpg>  
<https://www.dermis.net/bilder/CD178/550px/img0038.jpg>  
<https://www.dermis.net/bilder/CD178/550px/img0039.jpg>  
<https://www.dermis.net/bilder/CD183/550px/img0058.jpg>  
<https://www.dermis.net/bilder/CD018/550px/img0067.jpg>  
<https://www.dermis.net/bilder/CD190/550px/img0063.jpg>  
<https://www.dermis.net/bilder/CD190/550px/img0065.jpg>  
<https://www.dermis.net/bilder/CD198/550px/img0087.jpg>  
<https://www.dermis.net/bilder/CD033/550px/img0011.jpg>  
<https://www.dermis.net/bilder/CD212/550px/img0078.jpg>  
<https://www.dermis.net/bilder/CD212/550px/img0079.jpg>  
<https://www.dermis.net/bilder/CD012/550px/img0086.jpg>  
<https://www.dermis.net/bilder/CD211/550px/img0010.jpg>  
<https://www.dermis.net/bilder/CD210/550px/img0029.jpg>  
<https://www.dermis.net/bilder/CD025/550px/img0067.jpg>  
<https://www.dermis.net/bilder/CD183/550px/img0041.jpg>  
<https://www.dermis.net/bilder/CD183/550px/img0042.jpg>  
<https://www.dermis.net/bilder/CD183/550px/img0043.jpg>  
<https://www.dermis.net/bilder/CD193/550px/img0109.jpg>  
<https://www.dermis.net/bilder/CD193/550px/img0110.jpg>

<https://www.dermis.net/bilder/CD016/550px/img0005.jpg>  
<https://www.dermis.net/bilder/CD042/550px/img0048.jpg>  
<https://www.dermis.net/bilder/CD042/550px/img0050.jpg>  
<https://www.dermis.net/bilder/CD035/550px/img0085.jpg>  
<https://www.dermis.net/bilder/CD181/550px/img0026.jpg>  
<https://www.dermis.net/bilder/CD181/550px/img0025.jpg>  
<https://www.dermis.net/bilder/CD191/550px/img0058.jpg>  
<https://www.dermis.net/bilder/CD191/550px/img0059.jpg>  
<https://www.dermis.net/bilder/CD013/550px/img0029.jpg>  
<https://www.dermis.net/bilder/CD212/550px/img0085.jpg>  
<https://www.dermis.net/bilder/CD035/550px/img0067.jpg>  
<https://www.dermis.net/bilder/CD070/550px/img0085.jpg>  
<https://www.dermis.net/bilder/CD036/550px/img0015.jpg>  
<https://www.dermis.net/bilder/CD194/550px/img0110.jpg>  
<https://www.dermis.net/bilder/CD197/550px/img0045.jpg>  
<https://www.dermis.net/bilder/CD212/550px/img0048.jpg>  
<https://www.dermis.net/bilder/CD212/550px/img0050.jpg>  
<https://www.dermis.net/bilder/CD187/550px/img0074.jpg>  
<https://www.dermis.net/bilder/CD055/550px/img0060.jpg>  
<https://www.dermis.net/bilder/CD055/550px/img0061.jpg>  
<https://www.dermis.net/bilder/CD192/550px/img0048.jpg>  
<https://www.dermis.net/bilder/CD192/550px/img0049.jpg>  
<https://www.dermis.net/bilder/CD193/550px/img0185.jpg>  
<https://www.dermis.net/bilder/CD198/550px/img0122.jpg>  
<https://www.dermis.net/bilder/CD210/550px/img0090.jpg>  
<https://www.dermis.net/bilder/CD210/550px/img0092.jpg>  
<https://www.dermis.net/bilder/CD210/550px/img0093.jpg>  
<https://www.dermis.net/bilder/CD008/550px/img0012.jpg>  
<https://www.dermis.net/bilder/CD193/550px/img0078.jpg>  
<https://www.dermis.net/bilder/CD189/550px/img0051.jpg>  
<https://www.dermis.net/bilder/CD189/550px/img0052.jpg>  
<https://www.dermis.net/bilder/CD193/550px/img0143.jpg>  
<https://www.dermis.net/bilder/CD193/550px/img0144.jpg>  
<https://www.dermis.net/bilder/CD042/550px/img0011.jpg>  
<https://www.dermis.net/bilder/CD042/550px/img0012.jpg>  
<https://www.dermis.net/bilder/CD199/550px/img0113.jpg>  
<https://www.dermis.net/bilder/CD002/550px/img0070.jpg>  
<https://www.dermis.net/bilder/CD212/550px/img0104.jpg>  
<https://www.dermis.net/bilder/CD196/550px/img0138.jpg>  
<https://www.dermis.net/bilder/CD041/550px/img0058.jpg>  
<https://www.dermis.net/bilder/CD189/550px/img0096.jpg>  
<https://www.dermis.net/bilder/CD184/550px/img0055.jpg>  
<https://www.dermis.net/bilder/CD189/550px/img0043.jpg>  
<https://www.dermis.net/bilder/CD201/550px/img0031.jpg>  
<https://www.dermis.net/bilder/CD183/550px/img0065.jpg>  
<https://www.dermis.net/bilder/CD193/550px/img0157.jpg>  
<https://www.dermis.net/bilder/CD190/550px/img0012.jpg>  
<https://www.dermis.net/bilder/CD190/550px/img0013.jpg>

<https://www.dermis.net/bilder/CD011/550px/img0096.jpg>  
<https://www.dermis.net/bilder/CD042/550px/img0030.jpg>  
<https://www.dermis.net/bilder/CD042/550px/img0013.jpg>  
<https://www.dermis.net/bilder/CD196/550px/img0005.jpg>  
<https://www.dermis.net/bilder/CD194/550px/img0105.jpg>  
<https://www.dermis.net/bilder/CD055/550px/img0042.jpg>  
<https://www.dermis.net/bilder/CD057/550px/img0066.jpg>  
<https://www.dermis.net/bilder/CD040/550px/img0084.jpg>  
<https://www.dermis.net/bilder/CD181/550px/img0027.jpg>  
<https://www.dermis.net/bilder/CD055/550px/img0059.jpg>  
<https://www.dermis.net/bilder/CD184/550px/img0083.jpg>  
<https://www.dermis.net/bilder/CD183/550px/img0018.jpg>  
<https://www.dermis.net/bilder/CD025/550px/img0013.jpg>  
<https://www.dermis.net/bilder/CD033/550px/img0006.jpg>  
<https://www.dermis.net/bilder/CD195/550px/img0064.jpg>  
<https://www.dermis.net/bilder/CD195/550px/img0065.jpg>  
<https://www.dermis.net/bilder/CD210/550px/img0048.jpg>  
<https://www.dermis.net/bilder/CD193/550px/img0098.jpg>  
<https://www.dermis.net/bilder/CD196/550px/img0120.jpg>  
<https://www.dermis.net/bilder/CD042/550px/img0069.jpg>  
<https://www.dermis.net/bilder/CD198/550px/img0001.jpg>  
<https://www.dermis.net/bilder/CD180/550px/img0052.jpg>  
<https://www.dermis.net/bilder/CD194/550px/img0162.jpg>  
<https://www.dermis.net/bilder/CD027/550px/img0021.jpg>  
<https://www.dermis.net/bilder/CD001/550px/img0056.jpg>  
<https://www.dermis.net/bilder/CD178/550px/img0001.jpg>  
<https://www.dermis.net/bilder/CD184/550px/img0042.jpg>  
<https://www.dermis.net/bilder/CD194/550px/img0020.jpg>  
<https://www.dermis.net/bilder/CD194/550px/img0021.jpg>  
<https://www.dermis.net/bilder/CD194/550px/img0022.jpg>  
<https://www.dermis.net/bilder/CD035/550px/img0093.jpg>  
<https://www.dermis.net/bilder/CD056/550px/img0077.jpg>  
<https://www.dermis.net/bilder/CD192/550px/img0039.jpg>  
<https://www.dermis.net/bilder/CD055/550px/img0082.jpg>  
<https://www.dermis.net/bilder/CD198/550px/img0145.jpg>  
<https://www.dermis.net/bilder/CD198/550px/img0146.jpg>  
<https://www.dermis.net/bilder/CD041/550px/img0066.jpg>  
<https://www.dermis.net/bilder/CD008/550px/img0073.jpg>  
<https://www.dermis.net/bilder/CD013/550px/img0045.jpg>  
<https://www.dermis.net/bilder/CD042/550px/img0052.jpg>  
<https://www.dermis.net/bilder/CD070/550px/img0011.jpg>  
<https://www.dermis.net/bilder/CD070/550px/img0010.jpg>  
<https://www.dermis.net/bilder/CD070/550px/img0002.jpg>  
<https://www.dermis.net/bilder/CD194/550px/img0027.jpg>  
<https://www.dermis.net/bilder/CD042/550px/img0016.jpg>  
<https://www.dermis.net/bilder/CD001/550px/img0053.jpg>  
<https://www.dermis.net/bilder/CD006/550px/img0077.jpg>  
<https://www.dermis.net/bilder/CD182/550px/img0079.jpg>

<https://www.dermis.net/bilder/CD185/550px/img0024.jpg>  
<https://www.dermis.net/bilder/CD015/550px/img0001.jpg>  
<https://www.dermis.net/bilder/CD008/550px/img0020.jpg>  
<https://www.dermis.net/bilder/CD189/550px/img0041.jpg>  
<https://www.dermis.net/bilder/CD189/550px/img0042.jpg>  
<https://www.dermis.net/bilder/CD178/550px/img0037.jpg>  
<https://www.dermis.net/bilder/CD183/550px/img0045.jpg>  
<https://www.dermis.net/bilder/CD184/550px/img0081.jpg>  
<https://www.dermis.net/bilder/CD184/550px/img0082.jpg>  
<https://www.dermis.net/bilder/CD184/550px/img0061.jpg>  
<https://www.dermis.net/bilder/CD183/550px/img0056.jpg>  
<https://www.dermis.net/bilder/CD183/550px/img0057.jpg>  
<https://www.dermis.net/bilder/CD183/550px/img0060.jpg>  
<https://www.dermis.net/bilder/CD183/550px/img0061.jpg>  
<https://www.dermis.net/bilder/CD195/550px/img0028.jpg>  
<https://www.dermis.net/bilder/CD186/550px/img0006.jpg>  
<https://www.dermis.net/bilder/CD070/550px/img0083.jpg>  
<https://www.dermis.net/bilder/CD190/550px/img0062.jpg>  
<https://www.dermis.net/bilder/CD198/550px/img0086.jpg>  
<https://www.dermis.net/bilder/CD013/550px/img0031.jpg>  
<https://www.dermis.net/bilder/CD193/550px/img0013.jpg>  
<https://www.dermis.net/bilder/CD185/550px/img0044.jpg>  
<https://www.dermis.net/bilder/CD185/550px/img0045.jpg>  
<https://www.dermis.net/bilder/CD193/550px/img0033.jpg>  
<https://www.dermis.net/bilder/CD193/550px/img0034.jpg>  
<https://www.dermis.net/bilder/CD212/550px/img0100.jpg>  
<https://www.dermis.net/bilder/CD085/550px/img0072.jpg>  
<https://www.dermis.net/bilder/CD054/550px/img0018.jpg>  
<https://www.dermis.net/bilder/CD183/550px/img0062.jpg>  
<https://www.dermis.net/bilder/CD041/550px/img0087.jpg>  
<https://www.dermis.net/bilder/CD056/550px/img0060.jpg>  
<https://www.dermis.net/bilder/CD183/550px/img0040.jpg>  
<https://www.dermis.net/bilder/CD036/550px/img0011.jpg>  
<https://www.dermis.net/bilder/CD193/550px/img0101.jpg>  
<https://www.dermis.net/bilder/CD193/550px/img0155.jpg>  
<https://www.dermis.net/bilder/CD196/550px/img0027.jpg>  
<https://www.dermis.net/bilder/CD196/550px/img0145.jpg>  
<https://www.dermis.net/bilder/CD196/550px/img0146.jpg>  
<https://www.dermis.net/bilder/CD196/550px/img0147.jpg>  
<https://www.dermis.net/bilder/CD196/550px/img0148.jpg>  
<https://www.dermis.net/bilder/CD008/550px/img0002.jpg>  
<https://www.dermis.net/bilder/CD185/550px/img0080.jpg>  
<https://www.dermis.net/bilder/CD193/550px/img0070.jpg>  
<https://www.dermis.net/bilder/CD193/550px/img0121.jpg>  
<https://www.dermis.net/bilder/CD193/550px/img0122.jpg>  
<https://www.dermis.net/bilder/CD198/550px/img0116.jpg>  
<https://www.dermis.net/bilder/CD198/550px/img0117.jpg>  
<https://www.dermis.net/bilder/CD055/550px/img0044.jpg>

<https://www.dermis.net/bilder/CD178/550px/img0090.jpg>  
<https://www.dermis.net/bilder/CD178/550px/img0091.jpg>  
<https://www.dermis.net/bilder/CD184/550px/img0015.jpg>  
<https://www.dermis.net/bilder/CD184/550px/img0017.jpg>  
<https://www.dermis.net/bilder/CD013/550px/img0009.jpg>  
<https://www.dermis.net/bilder/CD007/550px/img0100.jpg>  
<https://www.dermis.net/bilder/CD196/550px/img0115.jpg>  
<https://www.dermis.net/bilder/CD196/550px/img0116.jpg>  
<https://www.dermis.net/bilder/CD042/550px/img0034.jpg>  
<https://www.dermis.net/bilder/CD194/550px/img0109.jpg>  
<https://www.dermis.net/bilder/CD198/550px/img0113.jpg>  
<https://www.dermis.net/bilder/CD191/550px/img0032.jpg>  
<https://www.dermis.net/bilder/CD192/550px/img0087.jpg>  
<https://www.dermis.net/bilder/CD192/550px/img0086.jpg>  
<https://www.dermis.net/bilder/CD189/550px/img0050.jpg>  
<https://www.dermis.net/bilder/CD193/550px/img0142.jpg>  
<https://www.dermis.net/bilder/CD007/550px/img0118.jpg>  
<https://www.dermis.net/bilder/CD210/550px/img0050.jpg>  
<https://www.dermis.net/bilder/CD002/550px/img0058.jpg>  
<https://www.dermis.net/bilder/CD005/550px/img0064.jpg>  
<https://www.dermis.net/bilder/CD005/550px/img0076.jpg>  
<https://www.dermis.net/bilder/CD002/550px/img0059.jpg>  
<https://www.dermis.net/bilder/CD001/550px/img0023.jpg>  
<https://www.dermis.net/bilder/CD001/550px/img0021.jpg>  
<https://www.dermis.net/bilder/CD001/550px/img0022.jpg>  
<https://www.dermis.net/bilder/CD016/550px/img0032.jpg>  
<https://www.dermis.net/bilder/CD021/550px/img0097.jpg>  
<https://www.dermis.net/bilder/CD002/550px/img0034.jpg>  
<https://www.dermis.net/bilder/CD190/550px/img0049.jpg>  
<https://www.dermis.net/bilder/CD070/550px/img0012.jpg>  
<https://www.dermis.net/bilder/CD035/550px/img0088.jpg>  
<https://www.dermis.net/bilder/CD194/550px/img0083.jpg>  
<https://www.dermis.net/bilder/CD194/550px/img0084.jpg>  
<https://www.dermis.net/bilder/CD194/550px/img0085.jpg>  
<https://www.dermis.net/bilder/CD180/550px/img0003.jpg>  
<https://www.dermis.net/bilder/CD185/550px/img0003.jpg>  
<https://www.dermis.net/bilder/CD055/550px/img0065.jpg>  
<https://www.dermis.net/bilder/CD178/550px/img0083.jpg>  
<https://www.dermis.net/bilder/CD189/550px/img0026.jpg>  
<https://www.dermis.net/bilder/CD189/550px/img0027.jpg>  
<https://www.dermis.net/bilder/CD189/550px/img0028.jpg>  
<https://www.dermis.net/bilder/CD187/550px/img0072.jpg>  
<https://www.dermis.net/bilder/CD199/550px/img0123.jpg>  
<https://www.dermis.net/bilder/CD212/550px/img0064.jpg>  
<https://www.dermis.net/bilder/CD013/550px/img0033.jpg>  
<https://www.dermis.net/bilder/CD210/550px/img0057.jpg>  
<https://www.dermis.net/bilder/CD199/550px/img0075.jpg>  
<https://www.dermis.net/bilder/CD212/550px/img0087.jpg>

<https://www.dermis.net/bilder/CD044/550px/img0034.jpg>  
<https://www.dermis.net/bilder/CD190/550px/img0041.jpg>  
<https://www.dermis.net/bilder/CD198/550px/img0055.jpg>  
<https://www.dermis.net/bilder/CD212/550px/img0029.jpg>  
<https://www.dermis.net/bilder/CD191/550px/img0050.jpg>  
<https://www.dermis.net/bilder/CD199/550px/img0120.jpg>  
<https://www.dermis.net/bilder/CD212/550px/img0016.jpg>  
<https://www.dermis.net/bilder/CD212/550px/img0017.jpg>  
<https://www.dermis.net/bilder/CD194/550px/img0134.jpg>  
<https://www.dermis.net/bilder/CD055/550px/img0056.jpg>  
<https://www.dermis.net/bilder/CD055/550px/img0057.jpg>  
<https://www.dermis.net/bilder/CD196/550px/img0006.jpg>  
<https://www.dermis.net/bilder/CD196/550px/img0009.jpg>  
<https://www.dermis.net/bilder/CD196/550px/img0010.jpg>  
<https://www.dermis.net/bilder/CD012/550px/img0008.jpg>  
<https://www.dermis.net/bilder/CD012/550px/img0009.jpg>  
<https://www.dermis.net/bilder/CD035/550px/img0081.jpg>  
<https://www.dermis.net/bilder/CD026/550px/img0007.jpg>  
<https://www.dermis.net/bilder/CD026/550px/img0015.jpg>  
<https://www.dermis.net/bilder/CD199/550px/img0031.jpg>  
<https://www.dermis.net/bilder/CD199/550px/img0032.jpg>  
<https://www.dermis.net/bilder/CD189/550px/img0040.jpg>  
<https://www.dermis.net/bilder/CD184/550px/img0041.jpg>  
<https://www.dermis.net/bilder/CD002/550px/img0082.jpg>  
<https://www.dermis.net/bilder/CD004/550px/img0013.jpg>  
<https://www.dermis.net/bilder/CD182/550px/img0009.jpg>  
<https://www.dermis.net/bilder/CD182/550px/img0011.jpg>  
<https://www.dermis.net/bilder/CD193/550px/img0136.jpg>  
<https://www.dermis.net/bilder/CD182/550px/img0008.jpg>  
<https://www.dermis.net/bilder/CD182/550px/img0007.jpg>  
<https://www.dermis.net/bilder/CD187/550px/img0024.jpg>  
<https://www.dermis.net/bilder/CD197/550px/img0063.jpg>  
<https://www.dermis.net/bilder/CD197/550px/img0064.jpg>  
<https://www.dermis.net/bilder/CD197/550px/img0047.jpg>  
<https://www.dermis.net/bilder/CD198/550px/img0137.jpg>  
<https://www.dermis.net/bilder/CD042/550px/img0029.jpg>  
<https://www.dermis.net/bilder/CD210/550px/img0049.jpg>  
<https://www.dermis.net/bilder/CD013/550px/img0026.jpg>  
<https://www.dermis.net/bilder/CD001/550px/img0095.jpg>  
<https://www.dermis.net/bilder/CD032/550px/img0089.jpg>  
<https://www.dermis.net/bilder/CD041/550px/img0077.jpg>  
<https://www.dermis.net/bilder/CD012/550px/img0076.jpg>  
<https://www.dermis.net/bilder/CD178/550px/img0101.jpg>  
<https://www.dermis.net/bilder/CD197/550px/img0046.jpg>  
<https://www.dermis.net/bilder/CD011/550px/img0034.jpg>  
<https://www.dermis.net/bilder/CD011/550px/img0044.jpg>  
<https://www.dermis.net/bilder/CD011/550px/img0046.jpg>  
<https://www.dermis.net/bilder/CD011/550px/img0047.jpg>



<https://www.dermis.net/bilder/CD025/550px/img0014.jpg>  
<https://www.dermis.net/bilder/CD193/550px/img0057.jpg>  
<https://www.dermis.net/bilder/CD002/550px/img0025.jpg>  
<https://www.dermis.net/bilder/CD008/550px/img0078.jpg>  
<https://www.dermis.net/bilder/CD037/550px/img0048.jpg>  
<https://www.dermis.net/bilder/CD194/550px/img0086.jpg>  
<https://www.dermis.net/bilder/CD196/550px/img0026.jpg>  
<https://www.dermis.net/bilder/CD002/550px/img0081.jpg>  
<https://www.dermis.net/bilder/CD181/550px/img0013.jpg>  
<https://www.dermis.net/bilder/CD033/550px/img0019.jpg>  
<https://www.dermis.net/bilder/CD002/550px/img0024.jpg>  
<https://www.dermis.net/bilder/CD033/550px/img0025.jpg>  
<https://www.dermis.net/bilder/CD033/550px/img0030.jpg>  
<https://www.dermis.net/bilder/CD055/550px/img0052.jpg>  
<https://www.dermis.net/bilder/CD041/550px/img0011.jpg>  
<https://www.dermis.net/bilder/CD027/550px/img0016.jpg>  
<https://www.dermis.net/bilder/CD036/550px/img0084.jpg>  
<https://www.dermis.net/bilder/CD198/550px/img0124.jpg>  
<https://www.dermis.net/bilder/CD199/550px/img0034.jpg>  
<https://www.dermis.net/bilder/CD054/550px/img0009.jpg>  
<https://www.dermis.net/bilder/CD054/550px/img0010.jpg>  
<https://www.dermis.net/bilder/CD016/550px/img0015.jpg>  
<https://www.dermis.net/bilder/CD012/550px/img0081.jpg>  
<https://www.dermis.net/bilder/CD025/550px/img0010.jpg>  
<https://www.dermis.net/bilder/CD193/550px/img0099.jpg>  
<https://www.dermis.net/bilder/CD026/550px/img0009.jpg>  
<https://www.dermis.net/bilder/CD186/550px/img0018.jpg>  
<https://www.dermis.net/bilder/CD017/550px/img0081.jpg>  
<https://www.dermis.net/bilder/CD013/550px/img0006.jpg>  
<https://www.dermis.net/bilder/CD013/550px/img0010.jpg>  
<https://www.dermis.net/bilder/CD193/550px/img0017.jpg>  
<https://www.dermis.net/bilder/CD002/550px/img0048.jpg>  
<https://www.dermis.net/bilder/CD193/550px/img0003.jpg>  
<https://www.dermis.net/bilder/CD180/550px/img0028.jpg>  
<https://www.dermis.net/bilder/CD002/550px/img0001.jpg>  
<https://www.dermis.net/bilder/CD002/550px/img0039.jpg>  
<https://www.dermis.net/bilder/CD042/550px/img0019.jpg>  
<https://www.dermis.net/bilder/CD042/550px/img0020.jpg>  
<https://www.dermis.net/bilder/CD199/550px/img0106.jpg>  
<https://www.dermis.net/bilder/CD013/550px/img0011.jpg>  
<https://www.dermis.net/bilder/CD189/550px/img0101.jpg>  
<https://www.dermis.net/bilder/CD193/550px/img0164.jpg>  
<https://www.dermis.net/bilder/CD193/550px/img0165.jpg>  
<https://www.dermis.net/bilder/CD201/550px/img0003.jpg>  
<https://www.dermis.net/bilder/CD002/550px/img0042.jpg>  
<https://www.dermis.net/bilder/CD194/550px/img0165.jpg>  
<https://www.dermis.net/bilder/CD042/550px/img0035.jpg>  
<https://www.dermis.net/bilder/CD184/550px/img0009.jpg>

<https://www.dermis.net/bilder/CD187/550px/img0001.jpg>  
<https://www.dermis.net/bilder/CD013/550px/img0012.jpg>  
<https://www.dermis.net/bilder/CD196/550px/img0012.jpg>  
<https://www.dermis.net/bilder/CD057/550px/img0069.jpg>  
<https://www.dermis.net/bilder/CD184/550px/img0010.jpg>  
<https://www.dermis.net/bilder/CD183/550px/img0070.jpg>  
<https://www.dermis.net/bilder/CD017/550px/img0041.jpg>  
<https://www.dermis.net/bilder/CD001/550px/img0083.jpg>  
<https://www.dermis.net/bilder/CD001/550px/img0099.jpg>  
<https://www.dermis.net/bilder/CD183/550px/img0002.jpg>  
<https://www.dermis.net/bilder/CD183/550px/img0016.jpg>  
<https://www.dermis.net/bilder/CD183/550px/img0017.jpg>  
<https://www.dermis.net/bilder/CD183/550px/img0020.jpg>  
<https://www.dermis.net/bilder/CD181/550px/img0070.jpg>  
<https://www.dermis.net/bilder/CD181/550px/img0069.jpg>  
<https://www.dermis.net/bilder/CD181/550px/img0068.jpg>  
<https://www.dermis.net/bilder/CD192/550px/img0099.jpg>  
<https://www.dermis.net/bilder/CD211/550px/img0076.jpg>  
<https://www.dermis.net/bilder/CD211/550px/img0012.jpg>  
<https://www.dermis.net/bilder/CD197/550px/img0031.jpg>  
<https://www.dermis.net/bilder/CD194/550px/img0107.jpg>  
<https://www.dermis.net/bilder/CD196/550px/img0034.jpg>  
<https://www.dermis.net/bilder/CD194/550px/img0106.jpg>  
<https://www.dermis.net/bilder/CD198/550px/img0028.jpg>  
<https://www.dermis.net/bilder/CD198/550px/img0030.jpg>  
<https://www.dermis.net/bilder/CD198/550px/img0142.jpg>  
<https://www.dermis.net/bilder/CD198/550px/img0143.jpg>  
<https://www.dermis.net/bilder/CD198/550px/img0096.jpg>  
<https://www.dermis.net/bilder/CD055/550px/img0073.jpg>  
<https://www.dermis.net/bilder/CD184/550px/img0111.jpg>  
<https://www.dermis.net/bilder/CD184/550px/img0112.jpg>  
<https://www.dermis.net/bilder/CD002/550px/img0009.jpg>  
<https://www.dermis.net/bilder/CD002/550px/img0036.jpg>  
<https://www.dermis.net/bilder/CD055/550px/img0009.jpg>  
<https://www.dermis.net/bilder/CD181/550px/img0060.jpg>  
<https://www.dermis.net/bilder/CD181/550px/img0057.jpg>  
<https://www.dermis.net/bilder/CD182/550px/img0005.jpg>  
<https://www.dermis.net/bilder/CD187/550px/img0002.jpg>  
<https://www.dermis.net/bilder/CD055/550px/img0003.jpg>  
<https://www.dermis.net/bilder/CD201/550px/img0001.jpg>  
<https://www.dermis.net/bilder/CD193/550px/img0115.jpg>  
<https://www.dermis.net/bilder/CD036/550px/img0013.jpg>  
<https://www.dermis.net/bilder/CD195/550px/img0104.jpg>  
<https://www.dermis.net/bilder/CD196/550px/img0051.jpg>  
<https://www.dermis.net/bilder/CD196/550px/img0052.jpg>  
<https://www.dermis.net/bilder/CD185/550px/img0017.jpg>  
<https://www.dermis.net/bilder/CD197/550px/img0059.jpg>  
<https://www.dermis.net/bilder/CD178/550px/img0019.jpg>

<https://www.dermis.net/bilder/CD178/550px/img0020.jpg>  
<https://www.dermis.net/bilder/CD179/550px/img0019.jpg>  
<https://www.dermis.net/bilder/CD040/550px/img0100.jpg>  
<https://www.dermis.net/bilder/CD187/550px/img0061.jpg>  
<https://www.dermis.net/bilder/CD184/550px/img0069.jpg>  
<https://www.dermis.net/bilder/CD195/550px/img0105.jpg>  
<https://www.dermis.net/bilder/CD198/550px/img0079.jpg>  
<https://www.dermis.net/bilder/CD194/550px/img0113.jpg>  
<https://www.dermis.net/bilder/CD196/550px/img0104.jpg>  
<https://www.dermis.net/bilder/CD183/550px/img0069.jpg>  
<https://www.dermis.net/bilder/CD196/550px/img0028.jpg>  
<https://www.dermis.net/bilder/CD212/550px/img0101.jpg>  
<https://www.dermis.net/bilder/CD196/550px/img0103.jpg>  
<https://www.dermis.net/bilder/CD196/550px/img0154.jpg>  
<https://www.dermis.net/bilder/CD191/550px/img0071.jpg>  
<https://www.dermis.net/bilder/CD071/550px/img0092.jpg>  
<https://www.dermis.net/bilder/CD040/550px/img0099.jpg>  
<https://www.dermis.net/bilder/CD012/550px/img0065.jpg>  
<https://www.dermis.net/bilder/CD033/550px/img0031.jpg>  
<https://www.dermis.net/bilder/CD054/550px/img0005.jpg>  
<https://www.dermis.net/bilder/CD007/550px/img0092.jpg>  
<https://www.dermis.net/bilder/CD002/550px/img0026.jpg>  
<https://www.dermis.net/bilder/CD191/550px/img0018.jpg>  
<https://www.dermis.net/bilder/CD002/550px/img0023.jpg>  
<https://www.dermis.net/bilder/CD022/550px/img0008.jpg>  
<https://www.dermis.net/bilder/CD193/550px/img0065.jpg>  
<https://www.dermis.net/bilder/CD192/550px/img0081.jpg>  
<https://www.dermis.net/bilder/CD184/550px/img0033.jpg>  
<https://www.dermis.net/bilder/CD002/550px/img0021.jpg>  
<https://www.dermis.net/bilder/CD191/550px/img0051.jpg>  
<https://www.dermis.net/bilder/CD181/550px/img0015.jpg>  
<https://www.dermis.net/bilder/CD055/550px/img0071.jpg>  
<https://www.dermis.net/bilder/CD002/550px/img0012.jpg>  
<https://www.dermis.net/bilder/CD192/550px/img0082.jpg>  
<https://www.dermis.net/bilder/CD007/550px/img0024.jpg>  
<https://www.dermis.net/bilder/CD194/550px/img0081.jpg>  
<https://www.dermis.net/bilder/CD194/550px/img0082.jpg>  
<https://www.dermis.net/bilder/CD195/550px/img0011.jpg>  
<https://www.dermis.net/bilder/CD197/550px/img0032.jpg>  
<https://www.dermis.net/bilder/CD197/550px/img0033.jpg>  
<https://www.dermis.net/bilder/CD190/550px/img0060.jpg>  
<https://www.dermis.net/bilder/CD190/550px/img0061.jpg>  
<https://www.dermis.net/bilder/CD187/550px/img0062.jpg>  
<https://www.dermis.net/bilder/CD187/550px/img0063.jpg>  
<https://www.dermis.net/bilder/CD179/550px/img0010.jpg>  
<https://www.dermis.net/bilder/CD195/550px/img0026.jpg>  
<https://www.dermis.net/bilder/CD199/550px/img0077.jpg>  
<https://www.dermis.net/bilder/CD184/550px/img0072.jpg>

<https://www.dermis.net/bilder/CD182/550px/img0076.jpg>  
<https://www.dermis.net/bilder/CD002/550px/img0018.jpg>  
<https://www.dermis.net/bilder/CD178/550px/img0021.jpg>  
<https://www.dermis.net/bilder/CD183/550px/img0082.jpg>  
<https://www.dermis.net/bilder/CD196/550px/img0030.jpg>  
<https://www.dermis.net/bilder/CD196/550px/img0031.jpg>  
<https://www.dermis.net/bilder/CD196/550px/img0158.jpg>  
<https://www.dermis.net/bilder/CD196/550px/img0157.jpg>  
<https://www.dermis.net/bilder/CD183/550px/img0068.jpg>  
<https://www.dermis.net/bilder/CD183/550px/img0071.jpg>  
<https://www.dermis.net/bilder/CD183/550px/img0072.jpg>  
<https://www.dermis.net/bilder/CD008/550px/img0044.jpg>  
<https://www.dermis.net/bilder/CD008/550px/img0074.jpg>  
<https://www.dermis.net/bilder/CD006/550px/img0015.jpg>  
<https://www.dermis.net/bilder/CD183/550px/img0081.jpg>  
<https://www.dermis.net/bilder/CD191/550px/img0048.jpg>  
<https://www.dermis.net/bilder/CD180/550px/img0005.jpg>  
<https://www.dermis.net/bilder/CD189/550px/img0095.jpg>  
<https://www.dermis.net/bilder/CD212/550px/img0088.jpg>  
<https://www.dermis.net/bilder/CD018/550px/img0004.jpg>  
<https://www.dermis.net/bilder/CD039/550px/img0019.jpg>  
<https://www.dermis.net/bilder/CD198/550px/img0084.jpg>  
<https://www.dermis.net/bilder/CD026/550px/img0011.jpg>  
<https://www.dermis.net/bilder/CD026/550px/img0012.jpg>  
<https://www.dermis.net/bilder/CD026/550px/img0008.jpg>  
<https://www.dermis.net/bilder/CD026/550px/img0010.jpg>  
<https://www.dermis.net/bilder/CD195/550px/img0036.jpg>  
<https://www.dermis.net/bilder/CD055/550px/img0041.jpg>  
<https://www.dermis.net/bilder/CD057/550px/img0065.jpg>  
<https://www.dermis.net/bilder/CD057/550px/img0018.jpg>  
<https://www.dermis.net/bilder/CD189/550px/img0104.jpg>  
<https://www.dermis.net/bilder/CD194/550px/img0144.jpg>  
<https://www.dermis.net/bilder/CD198/550px/img0018.jpg>  
<https://www.dermis.net/bilder/CD210/550px/img0140.jpg>  
<https://www.dermis.net/bilder/CD013/550px/img0041.jpg>  
<https://www.dermis.net/bilder/CD182/550px/img0068.jpg>  
<https://www.dermis.net/bilder/CD180/550px/img0055.jpg>  
<https://www.dermis.net/bilder/CD180/550px/img0009.jpg>  
<https://www.dermis.net/bilder/CD184/550px/img0032.jpg>  
<https://www.dermis.net/bilder/CD184/550px/img0113.jpg>  
<https://www.dermis.net/bilder/CD191/550px/img0010.jpg>  
<https://www.dermis.net/bilder/CD191/550px/img0081.jpg>  
<https://www.dermis.net/bilder/CD194/550px/img0097.jpg>  
<https://www.dermis.net/bilder/CD196/550px/img0128.jpg>  
<https://www.dermis.net/bilder/CD196/550px/img0129.jpg>  
<https://www.dermis.net/bilder/CD198/550px/img0125.jpg>  
<https://www.dermis.net/bilder/CD190/550px/img0040.jpg>  
<https://www.dermis.net/bilder/CD181/550px/img0061.jpg>

<https://www.dermis.net/bilder/CD183/550px/img0052.jpg>  
<https://www.dermis.net/bilder/CD183/550px/img0053.jpg>  
<https://www.dermis.net/bilder/CD183/550px/img0054.jpg>  
<https://www.dermis.net/bilder/CD183/550px/img0055.jpg>  
<https://www.dermis.net/bilder/CD192/550px/img0041.jpg>  
<https://www.dermis.net/bilder/CD195/550px/img0006.jpg>  
<https://www.dermis.net/bilder/CD195/550px/img0007.jpg>  
<https://www.dermis.net/bilder/CD044/550px/img0078.jpg>  
<https://www.dermis.net/bilder/CD026/550px/img0013.jpg>  
<https://www.dermis.net/bilder/CD026/550px/img0014.jpg>  
<https://www.dermis.net/bilder/CD004/550px/img0015.jpg>  
<https://www.dermis.net/bilder/CD035/550px/img0054.jpg>  
<https://www.dermis.net/bilder/CD036/550px/img0089.jpg>  
<https://www.dermis.net/bilder/CD198/550px/img0114.jpg>  
<https://www.dermis.net/bilder/CD191/550px/img0090.jpg>  
<https://www.dermis.net/bilder/CD191/550px/img0091.jpg>  
<https://www.dermis.net/bilder/CD191/550px/img0092.jpg>  
<https://www.dermis.net/bilder/CD178/550px/img0095.jpg>  
<https://www.dermis.net/bilder/CD184/550px/img0057.jpg>  
<https://www.dermis.net/bilder/CD197/550px/img0022.jpg>  
<https://www.dermis.net/bilder/CD035/550px/img0056.jpg>  
<https://www.dermis.net/bilder/CD212/550px/img0108.jpg>  
<https://www.dermis.net/bilder/CD180/550px/img0020.jpg>  
<https://www.dermis.net/bilder/CD180/550px/img0019.jpg>  
<https://www.dermis.net/bilder/CD184/550px/img0045.jpg>  
<https://www.dermis.net/bilder/CD012/550px/img0075.jpg>  
<https://www.dermis.net/bilder/CD189/550px/img0053.jpg>  
<https://www.dermis.net/bilder/CD191/550px/img0019.jpg>  
<https://www.dermis.net/bilder/CD191/550px/img0020.jpg>  
<https://www.dermis.net/bilder/CD195/550px/img0025.jpg>  
<https://www.dermis.net/bilder/CD196/550px/img0032.jpg>  
<https://www.dermis.net/bilder/CD196/550px/img0156.jpg>  
<https://www.dermis.net/bilder/CD193/550px/img0004.jpg>  
<https://www.dermis.net/bilder/CD193/550px/img0008.jpg>  
<https://www.dermis.net/bilder/CD198/550px/img0026.jpg>  
<https://www.dermis.net/bilder/CD198/550px/img0027.jpg>  
<https://www.dermis.net/bilder/CD012/550px/img0067.jpg>  
<https://www.dermis.net/bilder/CD194/550px/img0168.jpg>  
<https://www.dermis.net/bilder/CD180/550px/img0097.jpg>  
<https://www.dermis.net/bilder/CD210/550px/img0099.jpg>  
<https://www.dermis.net/bilder/CD025/550px/img0016.jpg>  
<https://www.dermis.net/bilder/CD011/550px/img0020.jpg>  
<https://www.dermis.net/bilder/CD011/550px/img0021.jpg>  
<https://www.dermis.net/bilder/CD013/550px/img0004.jpg>  
<https://www.dermis.net/bilder/CD194/550px/img0125.jpg>  
<https://www.dermis.net/bilder/CD194/550px/img0126.jpg>  
<https://www.dermis.net/bilder/CD186/550px/img0008.jpg>  
<https://www.dermis.net/bilder/CD184/550px/img0075.jpg>

<https://www.dermis.net/bilder/CD195/550px/img0024.jpg>  
<https://www.dermis.net/bilder/CD193/550px/img0156.jpg>  
<https://www.dermis.net/bilder/CD190/550px/img0048.jpg>  
<https://www.dermis.net/bilder/CD178/550px/img0067.jpg>  
<https://www.dermis.net/bilder/CD197/550px/img0038.jpg>  
<https://www.dermis.net/bilder/CD183/550px/img0028.jpg>  
<https://www.dermis.net/bilder/CD193/550px/img0071.jpg>  
<https://www.dermis.net/bilder/CD001/550px/img0041.jpg>  
<https://www.dermis.net/bilder/CD015/550px/img0012.jpg>  
<https://www.dermis.net/bilder/CD185/550px/img0021.jpg>  
<https://www.dermis.net/bilder/CD196/550px/img0094.jpg>  
<https://www.dermis.net/bilder/CD184/550px/img0043.jpg>  
<https://www.dermis.net/bilder/CD211/550px/img0102.jpg>  
<https://www.dermis.net/bilder/CD184/550px/img0044.jpg>  
<https://www.dermis.net/bilder/CD070/550px/img0013.jpg>  
<https://www.dermis.net/bilder/CD181/550px/img0088.jpg>  
<https://www.dermis.net/bilder/CD183/550px/img0001.jpg>  
<https://www.dermis.net/bilder/CD198/550px/img0022.jpg>  
<https://www.dermis.net/bilder/CD179/550px/img0004.jpg>  
<https://www.dermis.net/bilder/CD184/550px/img0027.jpg>  
<https://www.dermis.net/bilder/CD044/550px/img0081.jpg>  
<https://www.dermis.net/bilder/CD198/550px/img0077.jpg>  
<https://www.dermis.net/bilder/CD198/550px/img0078.jpg>  
<https://www.dermis.net/bilder/CD021/550px/img0082.jpg>  
<https://www.dermis.net/bilder/CD193/550px/img0137.jpg>  
<https://www.dermis.net/bilder/CD193/550px/img0138.jpg>  
<https://www.dermis.net/bilder/CD187/550px/img0076.jpg>  
<https://www.dermis.net/bilder/CD039/550px/img0032.jpg>  
<https://www.dermis.net/bilder/CD199/550px/img0035.jpg>  
<https://www.dermis.net/bilder/CD210/550px/img0089.jpg>  
<https://www.dermis.net/bilder/CD198/550px/img0080.jpg>  
<https://www.dermis.net/bilder/CD001/550px/img0008.jpg>  
<https://www.dermis.net/bilder/CD001/550px/img0086.jpg>  
<https://www.dermis.net/bilder/CD212/550px/img0113.jpg>  
<https://www.dermis.net/bilder/CD198/550px/img0003.jpg>  
<https://www.dermis.net/bilder/CD197/550px/img0012.jpg>  
<https://www.dermis.net/bilder/CD211/550px/img0037.jpg>  
<https://www.dermis.net/bilder/CD193/550px/img0128.jpg>  
<https://www.dermis.net/bilder/CD183/550px/img0064.jpg>  
<https://www.dermis.net/bilder/CD194/550px/img0076.jpg>  
<https://www.dermis.net/bilder/CD193/550px/img0097.jpg>  
<https://www.dermis.net/bilder/CD182/550px/img0078.jpg>  
<https://www.dermis.net/bilder/CD197/550px/img0065.jpg>  
<https://www.dermis.net/bilder/CD197/550px/img0066.jpg>  
<https://www.dermis.net/bilder/CD193/550px/img0063.jpg>  
<https://www.dermis.net/bilder/CD194/550px/img0011.jpg>  
<https://www.dermis.net/bilder/CD196/550px/img0046.jpg>  
<https://www.dermis.net/bilder/CD196/550px/img0047.jpg>

<https://www.dermis.net/bilder/CD196/550px/img0048.jpg>  
<https://www.dermis.net/bilder/CD070/550px/img0023.jpg>  
<https://www.dermis.net/bilder/CD193/550px/img0167.jpg>  
<https://www.dermis.net/bilder/CD193/550px/img0168.jpg>  
<https://www.dermis.net/bilder/CD212/550px/img0107.jpg>  
<https://www.dermis.net/bilder/CD035/550px/img0090.jpg>  
<https://www.dermis.net/bilder/CD035/550px/img0091.jpg>  
<https://www.dermis.net/bilder/CD005/550px/img0001.jpg>  
<https://www.dermis.net/bilder/CD184/550px/img0028.jpg>  
<https://www.dermis.net/bilder/CD184/550px/img0029.jpg>  
<https://www.dermis.net/bilder/CD182/550px/img0057.jpg>  
<https://www.dermis.net/bilder/CD182/550px/img0058.jpg>  
<https://www.dermis.net/bilder/CD194/550px/img0054.jpg>  
<https://www.dermis.net/bilder/CD194/550px/img0055.jpg>  
<https://www.dermis.net/bilder/CD198/550px/img0023.jpg>  
<https://www.dermis.net/bilder/CD211/550px/img0054.jpg>  
<https://www.dermis.net/bilder/CD198/550px/img0024.jpg>  
<https://www.dermis.net/bilder/CD198/550px/img0025.jpg>  
<https://www.dermis.net/bilder/CD182/550px/img0016.jpg>  
<https://www.dermis.net/bilder/CD182/550px/img0017.jpg>  
<https://www.dermis.net/bilder/CD008/550px/img0021.jpg>  
<https://www.dermis.net/bilder/CD210/550px/img0043.jpg>  
<https://www.dermis.net/bilder/CD035/550px/img0094.jpg>  
<https://www.dermis.net/bilder/CD212/550px/img0013.jpg>  
<https://www.dermis.net/bilder/CD212/550px/img0014.jpg>  
<https://www.dermis.net/bilder/CD021/550px/img0058.jpg>  
<https://www.dermis.net/bilder/CD185/550px/img0001.jpg>  
<https://www.dermis.net/bilder/CD185/550px/img0002.jpg>  
<https://www.dermis.net/bilder/CD182/550px/img0034.jpg>  
<https://www.dermis.net/bilder/CD182/550px/img0033.jpg>  
<https://www.dermis.net/bilder/CD211/550px/img0025.jpg>  
<https://www.dermis.net/bilder/CD191/550px/img0011.jpg>  
<https://www.dermis.net/bilder/CD191/550px/img0012.jpg>  
<https://www.dermis.net/bilder/CD198/550px/img0085.jpg>  
<https://www.dermis.net/bilder/CD210/550px/img0023.jpg>  
<https://www.dermis.net/bilder/CD008/550px/img0038.jpg>  
<https://www.dermis.net/bilder/CD008/550px/img0043.jpg>  
<https://www.dermis.net/bilder/CD187/550px/img0039.jpg>  
<https://www.dermis.net/bilder/CD187/550px/img0040.jpg>  
<https://www.dermis.net/bilder/CD187/550px/img0041.jpg>  
<https://www.dermis.net/bilder/CD187/550px/img0042.jpg>  
<https://www.dermis.net/bilder/CD187/550px/img0043.jpg>  
<https://www.dermis.net/bilder/CD189/550px/img0103.jpg>  
<https://www.dermis.net/bilder/CD199/550px/img0025.jpg>  
<https://www.dermis.net/bilder/CD194/550px/img0031.jpg>  
<https://www.dermis.net/bilder/CD194/550px/img0032.jpg>  
<https://www.dermis.net/bilder/CD194/550px/img0033.jpg>  
<https://www.dermis.net/bilder/CD194/550px/img0166.jpg>

<https://www.dermis.net/bilder/CD198/550px/img0056.jpg>  
<https://www.dermis.net/bilder/CD198/550px/img0057.jpg>  
<https://www.dermis.net/bilder/CD210/550px/img0018.jpg>  
<https://www.dermis.net/bilder/CD198/550px/img0159.jpg>  
<https://www.dermis.net/bilder/CD190/550px/img0021.jpg>  
<https://www.dermis.net/bilder/CD190/550px/img0022.jpg>  
<https://www.dermis.net/bilder/CD194/550px/img0127.jpg>  
<https://www.dermis.net/bilder/CD194/550px/img0128.jpg>  
<https://www.dermis.net/bilder/CD198/550px/img0097.jpg>  
<https://www.dermis.net/bilder/CD198/550px/img0098.jpg>  
<https://www.dermis.net/bilder/CD198/550px/img0101.jpg>  
<https://www.dermis.net/bilder/CD196/550px/img0102.jpg>  
<https://www.dermis.net/bilder/CD036/550px/img0085.jpg>  
<https://www.dermis.net/bilder/CD054/550px/img0022.jpg>  
<https://www.dermis.net/bilder/CD054/550px/img0014.jpg>  
<https://www.dermis.net/bilder/CD026/550px/img0031.jpg>  
<https://www.dermis.net/bilder/CD042/550px/img0081.jpg>  
<https://www.dermis.net/bilder/CD178/550px/img0068.jpg>  
<https://www.dermis.net/bilder/CD198/550px/img0054.jpg>  
<https://www.dermis.net/bilder/CD211/550px/img0101.jpg>  
<https://www.dermis.net/bilder/CD025/550px/img0072.jpg>  
<https://www.dermis.net/bilder/CD002/550px/img0062.jpg>  
<https://www.dermis.net/bilder/CD194/550px/img0163.jpg>  
<https://www.dermis.net/bilder/CD212/550px/img0110.jpg>  
<https://www.dermis.net/bilder/CD032/550px/img0088.jpg>  
<https://www.dermis.net/bilder/CD032/550px/img0090.jpg>  
<https://www.dermis.net/bilder/CD182/550px/img0004.jpg>  
<https://www.dermis.net/bilder/CD182/550px/img0003.jpg>  
<https://www.dermis.net/bilder/CD180/550px/img0027.jpg>  
<https://www.dermis.net/bilder/CD178/550px/img0066.jpg>  
<https://www.dermis.net/bilder/CD196/550px/img0079.jpg>  
<https://www.dermis.net/bilder/CD196/550px/img0080.jpg>  
<https://www.dermis.net/bilder/CD178/550px/img0008.jpg>  
<https://www.dermis.net/bilder/CD211/550px/img0096.jpg>  
<https://www.dermis.net/bilder/CD198/550px/img0040.jpg>  
<https://www.dermis.net/bilder/CD198/550px/img0041.jpg>  
<https://www.dermis.net/bilder/CD055/550px/img0072.jpg>  
<https://www.dermis.net/bilder/CD196/550px/img0007.jpg>  
<https://www.dermis.net/bilder/CD196/550px/img0008.jpg>  
<https://www.dermis.net/bilder/CD181/550px/img0090.jpg>  
<https://www.dermis.net/bilder/CD179/550px/img0030.jpg>  
<https://www.dermis.net/bilder/CD211/550px/img0027.jpg>  
<https://www.dermis.net/bilder/CD211/550px/img0028.jpg>  
<https://www.dermis.net/bilder/CD040/550px/img0074.jpg>  
<https://www.dermis.net/bilder/CD194/550px/img0161.jpg>  
<https://www.dermis.net/bilder/CD189/550px/img0105.jpg>  
<https://www.dermis.net/bilder/CD194/550px/img0119.jpg>  
<https://www.dermis.net/bilder/CD197/550px/img0074.jpg>



<https://www.dermis.net/bilder/CD194/550px/img0049.jpg>  
<https://www.dermis.net/bilder/CD198/550px/img0081.jpg>  
<https://www.dermis.net/bilder/CD198/550px/img0072.jpg>  
<https://www.dermis.net/bilder/CD198/550px/img0009.jpg>  
<https://www.dermis.net/bilder/CD211/550px/img0056.jpg>  
<https://www.dermis.net/bilder/CD012/550px/img0074.jpg>  
<https://www.dermis.net/bilder/CD029/550px/img0013.jpg>  
<https://www.dermis.net/bilder/CD182/550px/img0021.jpg>  
<https://www.dermis.net/bilder/CD182/550px/img0020.jpg>  
<https://www.dermis.net/bilder/CD182/550px/img0019.jpg>  
<https://www.dermis.net/bilder/CD182/550px/img0018.jpg>  
<https://www.dermis.net/bilder/CD055/550px/img0074.jpg>  
<https://www.dermis.net/bilder/CD035/550px/img0078.jpg>  
<https://www.dermis.net/bilder/CD002/550px/img0022.jpg>  
<https://www.dermis.net/bilder/CD002/550px/img0047.jpg>  
<https://www.dermis.net/bilder/CD193/550px/img0066.jpg>  
<https://www.dermis.net/bilder/CD194/550px/img0135.jpg>  
<https://www.dermis.net/bilder/CD057/550px/img0015.jpg>  
<https://www.dermis.net/bilder/CD002/550px/img0004.jpg>  
<https://www.dermis.net/bilder/CD013/550px/img0035.jpg>  
<https://www.dermis.net/bilder/CD013/550px/img0036.jpg>  
<https://www.dermis.net/bilder/CD013/550px/img0037.jpg>  
<https://www.dermis.net/bilder/CD018/550px/img0114.jpg>  
<https://www.dermis.net/bilder/CD002/550px/img0029.jpg>  
<https://www.dermis.net/bilder/CD184/550px/img0053.jpg>  
<https://www.dermis.net/bilder/CD002/550px/img0027.jpg>  
<https://www.dermis.net/bilder/CD033/550px/img0039.jpg>  
<https://www.dermis.net/bilder/CD186/550px/img0007.jpg>  
<https://www.dermis.net/bilder/CD194/550px/img0167.jpg>  
<https://www.dermis.net/bilder/CD033/550px/img0022.jpg>  
<https://www.dermis.net/bilder/CD193/550px/img0014.jpg>  
<https://www.dermis.net/bilder/CD193/550px/img0015.jpg>  
<https://www.dermis.net/bilder/CD193/550px/img0016.jpg>  
<https://www.dermis.net/bilder/CD181/550px/img0014.jpg>  
<https://www.dermis.net/bilder/CD002/550px/img0033.jpg>  
<https://www.dermis.net/bilder/CD033/550px/img0003.jpg>  
<https://www.dermis.net/bilder/CD194/550px/img0079.jpg>  
<https://www.dermis.net/bilder/CD194/550px/img0080.jpg>  
<https://www.dermis.net/bilder/CD196/550px/img0112.jpg>  
<https://www.dermis.net/bilder/CD196/550px/img0114.jpg>  
<https://www.dermis.net/bilder/CD197/550px/img0058.jpg>  
<https://www.dermis.net/bilder/CD193/550px/img0053.jpg>  
<https://www.dermis.net/bilder/CD193/550px/img0054.jpg>  
<https://www.dermis.net/bilder/CD002/550px/img0003.jpg>  
<https://www.dermis.net/bilder/CD033/550px/img0004.jpg>  
<https://www.dermis.net/bilder/CD033/550px/img0016.jpg>  
<https://www.dermis.net/bilder/CD210/550px/img0028.jpg>  
<https://www.dermis.net/bilder/CD196/550px/img0033.jpg>

<https://www.dermis.net/bilder/CD196/550px/img0155.jpg>  
<https://www.dermis.net/bilder/CD193/550px/img0001.jpg>  
<https://www.dermis.net/bilder/CD193/550px/img0002.jpg>  
<https://www.dermis.net/bilder/CD193/550px/img0006.jpg>  
<https://www.dermis.net/bilder/CD007/550px/img0090.jpg>  
<https://www.dermis.net/bilder/CD194/550px/img0111.jpg>  
<https://www.dermis.net/bilder/CD194/550px/img0112.jpg>  
<https://www.dermis.net/bilder/CD191/550px/img0005.jpg>  
<https://www.dermis.net/bilder/CD002/550px/img0008.jpg>  
<https://www.dermis.net/bilder/CD055/550px/img0075.jpg>  
<https://www.dermis.net/bilder/CD002/550px/img0005.jpg>  
<https://www.dermis.net/bilder/CD196/550px/img0029.jpg>  
<https://www.dermis.net/bilder/CD033/550px/img0015.jpg>  
<https://www.dermis.net/bilder/CD211/550px/img0009.jpg>  
<https://www.dermis.net/bilder/CD029/550px/img0008.jpg>  
<https://www.dermis.net/bilder/CD041/550px/img0093.jpg>  
<https://www.dermis.net/bilder/CD198/550px/img0075.jpg>  
<https://www.dermis.net/bilder/CD196/550px/img0095.jpg>  
<https://www.dermis.net/bilder/CD196/550px/img0096.jpg>  
<https://www.dermis.net/bilder/CD195/550px/img0085.jpg>  
<https://www.dermis.net/bilder/CD195/550px/img0086.jpg>  
<https://www.dermis.net/bilder/CD212/550px/img0082.jpg>  
<https://www.dermis.net/bilder/CD035/550px/img0083.jpg>  
<https://www.dermis.net/bilder/CD187/550px/img0044.jpg>  
<https://www.dermis.net/bilder/CD187/550px/img0045.jpg>  
<https://www.dermis.net/bilder/CD187/550px/img0046.jpg>  
<https://www.dermis.net/bilder/CD197/550px/img0029.jpg>  
<https://www.dermis.net/bilder/CD197/550px/img0030.jpg>  
<https://www.dermis.net/bilder/CD002/550px/img0045.jpg>  
<https://www.dermis.net/bilder/CD199/550px/img0126.jpg>  
<https://www.dermis.net/bilder/CD055/550px/img0064.jpg>  
<https://www.dermis.net/bilder/CD002/550px/img0053.jpg>  
<https://www.dermis.net/bilder/CD041/550px/img0056.jpg>  
<https://www.dermis.net/bilder/CD183/550px/img0046.jpg>  
<https://www.dermis.net/bilder/CD212/550px/img0010.jpg>  
<https://www.dermis.net/bilder/CD195/550px/img0032.jpg>  
<https://www.dermis.net/bilder/CD025/550px/img0018.jpg>  
<https://www.dermis.net/bilder/CD002/550px/img0055.jpg>  
<https://www.dermis.net/bilder/CD013/550px/img0024.jpg>  
<https://www.dermis.net/bilder/CD001/550px/img0093.jpg>  
<https://www.dermis.net/bilder/CD034/550px/img0056.jpg>  
<https://www.dermis.net/bilder/CD056/550px/img0019.jpg>  
<https://www.dermis.net/bilder/CD069/550px/img0113.jpg>  
<https://www.dermis.net/bilder/CD070/550px/img0086.jpg>  
<https://www.dermis.net/bilder/CD051/550px/img0061.jpg>  
<https://www.dermis.net/bilder/CD051/550px/img0062.jpg>  
<https://www.dermis.net/bilder/CD036/550px/img0052.jpg>  
<https://www.dermis.net/bilder/CD025/550px/img0052.jpg>

<https://www.dermis.net/bilder/CD001/550px/img0007.jpg>  
<https://www.dermis.net/bilder/CD071/550px/img0067.jpg>  
<https://www.dermis.net/bilder/CD050/550px/img0009.jpg>  
<https://www.dermis.net/bilder/CD004/550px/img0003.jpg>  
<https://www.dermis.net/bilder/CD054/550px/img0008.jpg>  
<https://www.dermis.net/bilder/CD069/550px/img0087.jpg>  
<https://www.dermis.net/bilder/CD071/550px/img0036.jpg>  
<https://www.dermis.net/bilder/CD050/550px/img0070.jpg>  
<https://www.dermis.net/bilder/CD006/550px/img0048.jpg>  
<https://www.dermis.net/bilder/CD014/550px/img0091.jpg>  
<https://www.dermis.net/bilder/CD056/550px/img0033.jpg>  
<https://www.dermis.net/bilder/CD041/550px/img0020.jpg>  
<https://www.dermis.net/bilder/CD005/550px/img0072.jpg>  
<https://www.dermis.net/bilder/CD037/550px/img0052.jpg>  
<https://www.dermis.net/bilder/CD006/550px/img0075.jpg>  
<https://www.dermis.net/bilder/CD026/550px/img0034.jpg>  
<https://www.dermis.net/bilder/CD071/550px/img0028.jpg>  
<https://www.dermis.net/bilder/CD044/550px/img0024.jpg>  
<https://www.dermis.net/bilder/CD044/550px/img0037.jpg>  
<https://www.dermis.net/bilder/CD057/550px/img0036.jpg>  
<https://www.dermis.net/bilder/CD007/550px/img0031.jpg>  
<https://www.dermis.net/bilder/CD025/550px/img0034.jpg>  
<https://www.dermis.net/bilder/CD025/550px/img0036.jpg>  
<https://www.dermis.net/bilder/CD006/550px/img0065.jpg>  
<https://www.dermis.net/bilder/CD026/550px/img0016.jpg>  
<https://www.dermis.net/bilder/CD040/550px/img0041.jpg>  
<https://www.dermis.net/bilder/CD057/550px/img0023.jpg>  
<https://www.dermis.net/bilder/CD002/550px/img0050.jpg>  
<https://www.dermis.net/bilder/CD026/550px/img0090.jpg>  
<https://www.dermis.net/bilder/CD026/550px/img0091.jpg>  
<https://www.dermis.net/bilder/CD027/550px/img0002.jpg>  
<https://www.dermis.net/bilder/CD027/550px/img0001.jpg>  
<https://www.dermis.net/bilder/CD002/550px/img0049.jpg>  
<https://www.dermis.net/bilder/CD044/550px/img0013.jpg>  
<https://www.dermis.net/bilder/CD044/550px/img0014.jpg>  
<https://www.dermis.net/bilder/CD006/550px/img0060.jpg>  
<https://www.dermis.net/bilder/CD046/550px/img0011.jpg>  
<https://www.dermis.net/bilder/CD026/550px/img0042.jpg>  
<https://www.dermis.net/bilder/CD051/550px/img0016.jpg>  
<https://www.dermis.net/bilder/CD005/550px/img0055.jpg>  
<https://www.dermis.net/bilder/CD191/550px/img0014.jpg>  
<https://www.dermis.net/bilder/CD026/550px/img0089.jpg>  
<https://www.dermis.net/bilder/CD044/550px/img0011.jpg>  
<https://www.dermis.net/bilder/CD184/550px/img0093.jpg>  
<https://www.dermis.net/bilder/CD190/550px/img0067.jpg>  
<https://www.dermis.net/bilder/CD041/550px/img0057.jpg>  
<https://www.dermis.net/bilder/CD040/550px/img0030.jpg>  
<https://www.dermis.net/bilder/CD013/550px/img0001.jpg>

<https://www.dermis.net/bilder/CD042/550px/img0068.jpg>  
<https://www.dermis.net/bilder/CD193/550px/img0145.jpg>  
<https://www.dermis.net/bilder/CD003/550px/img0062.jpg>  
<https://www.dermis.net/bilder/CD001/550px/img0030.jpg>  
<https://www.dermis.net/bilder/CD001/550px/img0059.jpg>  
<https://www.dermis.net/bilder/CD195/550px/img0040.jpg>  
<https://www.dermis.net/bilder/CD183/550px/img0092.jpg>  
<https://www.dermis.net/bilder/CD198/550px/img0131.jpg>  
<https://www.dermis.net/bilder/CD198/550px/img0132.jpg>  
<https://www.dermis.net/bilder/CD198/550px/img0160.jpg>  
<https://www.dermis.net/bilder/CD025/550px/img0019.jpg>  
<https://www.dermis.net/bilder/CD012/550px/img0027.jpg>  
<https://www.dermis.net/bilder/CD212/550px/img0011.jpg>  
<https://www.dermis.net/bilder/CD051/550px/img0006.jpg>  
<https://www.dermis.net/bilder/CD085/550px/img0080.jpg>  
<https://www.dermis.net/bilder/CD184/550px/img0038.jpg>  
<https://www.dermis.net/bilder/CD184/550px/img0039.jpg>  
<https://www.dermis.net/bilder/CD178/550px/img0092.jpg>  
<https://www.dermis.net/bilder/CD181/550px/img0039.jpg>  
<https://www.dermis.net/bilder/CD181/550px/img0040.jpg>  
<https://www.dermis.net/bilder/CD001/550px/img0024.jpg>  
<https://www.dermis.net/bilder/CD192/550px/img0071.jpg>  
<https://www.dermis.net/bilder/CD192/550px/img0072.jpg>  
<https://www.dermis.net/bilder/CD189/550px/img0035.jpg>  
<https://www.dermis.net/bilder/CD189/550px/img0036.jpg>  
<https://www.dermis.net/bilder/CD191/550px/img0064.jpg>  
<https://www.dermis.net/bilder/CD198/550px/img0042.jpg>  
<https://www.dermis.net/bilder/CD198/550px/img0043.jpg>  
<https://www.dermis.net/bilder/CD198/550px/img0044.jpg>  
<https://www.dermis.net/bilder/CD198/550px/img0045.jpg>  
<https://www.dermis.net/bilder/CD021/550px/img0098.jpg>  
<https://www.dermis.net/bilder/CD035/550px/img0072.jpg>  
<https://www.dermis.net/bilder/CD043/550px/img0004.jpg>  
<https://www.dermis.net/bilder/CD184/550px/img0014.jpg>  
<https://www.dermis.net/bilder/CD190/550px/img0055.jpg>  
<https://www.dermis.net/bilder/CD190/550px/img0056.jpg>  
<https://www.dermis.net/bilder/CD193/550px/img0117.jpg>  
<https://www.dermis.net/bilder/CD181/550px/img0017.jpg>  
<https://www.dermis.net/bilder/CD185/550px/img0025.jpg>  
<https://www.dermis.net/bilder/CD013/550px/img0007.jpg>  
<https://www.dermis.net/bilder/CD054/550px/img0020.jpg>  
<https://www.dermis.net/bilder/CD051/550px/img0060.jpg>  
<https://www.dermis.net/bilder/CD018/550px/img0072.jpg>  
<https://www.dermis.net/bilder/CD016/550px/img0022.jpg>  
<https://www.dermis.net/bilder/CD018/550px/img0013.jpg>  
<https://www.dermis.net/bilder/CD037/550px/img0002.jpg>  
<https://www.dermis.net/bilder/CD005/550px/img0045.jpg>  
<https://www.dermis.net/bilder/CD035/550px/img0046.jpg>

<https://www.dermis.net/bilder/CD052/550px/img0067.jpg>  
<https://www.dermis.net/bilder/CD003/550px/img0074.jpg>  
<https://www.dermis.net/bilder/CD001/550px/img0096.jpg>  
<https://www.dermis.net/bilder/CD069/550px/img0002.jpg>  
<https://www.dermis.net/bilder/CD069/550px/img0003.jpg>  
<https://www.dermis.net/bilder/CD018/550px/img0016.jpg>  
<https://www.dermis.net/bilder/CD071/550px/img0018.jpg>  
<https://www.dermis.net/bilder/CD071/550px/img0019.jpg>  
<https://www.dermis.net/bilder/CD071/550px/img0020.jpg>  
<https://www.dermis.net/bilder/CD069/550px/img0089.jpg>  
<https://www.dermis.net/bilder/CD034/550px/img0055.jpg>  
<https://www.dermis.net/bilder/CD040/550px/img0065.jpg>  
<https://www.dermis.net/bilder/CD054/550px/img0021.jpg>  
<https://www.dermis.net/bilder/CD056/550px/img0052.jpg>  
<https://www.dermis.net/bilder/CD069/550px/img0094.jpg>  
<https://www.dermis.net/bilder/CD069/550px/img0095.jpg>  
<https://www.dermis.net/bilder/CD036/550px/img0072.jpg>  
<https://www.dermis.net/bilder/CD056/550px/img0053.jpg>  
<https://www.dermis.net/bilder/CD040/550px/img0020.jpg>  
<https://www.dermis.net/bilder/CD040/550px/img0017.jpg>  
<https://www.dermis.net/bilder/CD003/550px/img0032.jpg>  
<https://www.dermis.net/bilder/CD007/550px/img0012.jpg>  
<https://www.dermis.net/bilder/CD020/550px/img0002.jpg>  
<https://www.dermis.net/bilder/CD001/550px/img0060.jpg>  
<https://www.dermis.net/bilder/CD020/550px/img0001.jpg>  
<https://www.dermis.net/bilder/CD056/550px/img0061.jpg>  
<https://www.dermis.net/bilder/CD069/550px/img0106.jpg>  
<https://www.dermis.net/bilder/CD016/550px/img0050.jpg>  
<https://www.dermis.net/bilder/CD034/550px/img0062.jpg>  
<https://www.dermis.net/bilder/CD034/550px/img0063.jpg>  
<https://www.dermis.net/bilder/CD001/550px/img0074.jpg>  
<https://www.dermis.net/bilder/CD070/550px/img0003.jpg>  
<https://www.dermis.net/bilder/CD071/550px/img0048.jpg>  
<https://www.dermis.net/bilder/CD006/550px/img0041.jpg>  
<https://www.dermis.net/bilder/CD035/550px/img0009.jpg>  
<https://www.dermis.net/bilder/CD069/550px/img0081.jpg>  
<https://www.dermis.net/bilder/CD014/550px/img0044.jpg>  
<https://www.dermis.net/bilder/CD018/550px/img0046.jpg>  
<https://www.dermis.net/bilder/CD036/550px/img0069.jpg>  
<https://www.dermis.net/bilder/CD050/550px/img0067.jpg>  
<https://www.dermis.net/bilder/CD056/550px/img0040.jpg>  
<https://www.dermis.net/bilder/CD036/550px/img0007.jpg>  
<https://www.dermis.net/bilder/CD056/550px/img0041.jpg>  
<https://www.dermis.net/bilder/CD071/550px/img0072.jpg>  
<https://www.dermis.net/bilder/CD036/550px/img0006.jpg>  
<https://www.dermis.net/bilder/CD014/550px/img0067.jpg>  
<https://www.dermis.net/bilder/CD035/550px/img0040.jpg>  
<https://www.dermis.net/bilder/CD035/550px/img0041.jpg>

<https://www.dermis.net/bilder/CD006/550px/img0068.jpg>  
<https://www.dermis.net/bilder/CD014/550px/img0068.jpg>  
<https://www.dermis.net/bilder/CD070/550px/img0014.jpg>  
<https://www.dermis.net/bilder/CD003/550px/img0097.jpg>  
<https://www.dermis.net/bilder/CD056/550px/img0003.jpg>  
<https://www.dermis.net/bilder/CD035/550px/img0038.jpg>  
<https://www.dermis.net/bilder/CD035/550px/img0039.jpg>  
<https://www.dermis.net/bilder/CD070/550px/img0005.jpg>  
<https://www.dermis.net/bilder/CD069/550px/img0100.jpg>  
<https://www.dermis.net/bilder/CD004/550px/img0084.jpg>  
<https://www.dermis.net/bilder/CD036/550px/img0033.jpg>  
<https://www.dermis.net/bilder/CD047/550px/img0029.jpg>  
<https://www.dermis.net/bilder/CD005/550px/img0070.jpg>  
<https://www.dermis.net/bilder/CD006/550px/img0013.jpg>  
<https://www.dermis.net/bilder/CD005/550px/img0058.jpg>  
<https://www.dermis.net/bilder/CD051/550px/img0075.jpg>  
<https://www.dermis.net/bilder/CD004/550px/img0079.jpg>  
<https://www.dermis.net/bilder/CD069/550px/img0088.jpg>  
<https://www.dermis.net/bilder/CD018/550px/img0059.jpg>  
<https://www.dermis.net/bilder/CD051/550px/img0074.jpg>  
<https://www.dermis.net/bilder/CD004/550px/img0005.jpg>  
<https://www.dermis.net/bilder/CD043/550px/img0012.jpg>  
<https://www.dermis.net/bilder/CD024/550px/img0018.jpg>  
<https://www.dermis.net/bilder/CD070/550px/img0007.jpg>  
<https://www.dermis.net/bilder/CD043/550px/img0011.jpg>  
<https://www.dermis.net/bilder/CD004/550px/img0078.jpg>  
<https://www.dermis.net/bilder/CD014/550px/img0022.jpg>  
<https://www.dermis.net/bilder/CD018/550px/img0070.jpg>  
<https://www.dermis.net/bilder/CD002/550px/img0060.jpg>  
<https://www.dermis.net/bilder/CD015/550px/img0052.jpg>  
<https://www.dermis.net/bilder/CD025/550px/img0059.jpg>  
<https://www.dermis.net/bilder/CD025/550px/img0060.jpg>  
<https://www.dermis.net/bilder/CD028/550px/img0061.jpg>  
<https://www.dermis.net/bilder/CD028/550px/img0063.jpg>  
<https://www.dermis.net/bilder/CD021/550px/img0069.jpg>  
<https://www.dermis.net/bilder/CD006/550px/img0053.jpg>  
<https://www.dermis.net/bilder/CD016/550px/img0045.jpg>  
<https://www.dermis.net/bilder/CD023/550px/img0019.jpg>  
<https://www.dermis.net/bilder/CD023/550px/img0020.jpg>  
<https://www.dermis.net/bilder/CD028/550px/img0062.jpg>  
<https://www.dermis.net/bilder/CD018/550px/img0045.jpg>  
<https://www.dermis.net/bilder/CD003/550px/img0086.jpg>  
<https://www.dermis.net/bilder/CD054/550px/img0013.jpg>  
<https://www.dermis.net/bilder/CD041/550px/img0074.jpg>  
<https://www.dermis.net/bilder/CD041/550px/img0075.jpg>  
<https://www.dermis.net/bilder/CD014/550px/img0041.jpg>  
<https://www.dermis.net/bilder/CD052/550px/img0058.jpg>  
<https://www.dermis.net/bilder/CD003/550px/img0039.jpg>

<https://www.dermis.net/bilder/CD014/550px/img0039.jpg>  
<https://www.dermis.net/bilder/CD016/550px/img0048.jpg>  
<https://www.dermis.net/bilder/CD026/550px/img0054.jpg>  
<https://www.dermis.net/bilder/CD026/550px/img0053.jpg>  
<https://www.dermis.net/bilder/CD071/550px/img0005.jpg>  
<https://www.dermis.net/bilder/CD026/550px/img0055.jpg>  
<https://www.dermis.net/bilder/CD003/550px/img0035.jpg>  
<https://www.dermis.net/bilder/CD014/550px/img0030.jpg>  
<https://www.dermis.net/bilder/CD003/550px/img0045.jpg>  
<https://www.dermis.net/bilder/CD003/550px/img0090.jpg>  
<https://www.dermis.net/bilder/CD004/550px/img0082.jpg>  
<https://www.dermis.net/bilder/CD005/550px/img0044.jpg>  
<https://www.dermis.net/bilder/CD004/550px/img0063.jpg>  
<https://www.dermis.net/bilder/CD016/550px/img0020.jpg>  
<https://www.dermis.net/bilder/CD037/550px/img0022.jpg>  
<https://www.dermis.net/bilder/CD036/550px/img0028.jpg>  
<https://www.dermis.net/bilder/CD024/550px/img0035.jpg>  
<https://www.dermis.net/bilder/CD024/550px/img0036.jpg>  
<https://www.dermis.net/bilder/CD026/550px/img0003.jpg>  
<https://www.dermis.net/bilder/CD026/550px/img0001.jpg>  
<https://www.dermis.net/bilder/CD026/550px/img0002.jpg>  
<https://www.dermis.net/bilder/CD004/550px/img0056.jpg>  
<https://www.dermis.net/bilder/CD018/550px/img0099.jpg>  
<https://www.dermis.net/bilder/CD027/550px/img0046.jpg>  
<https://www.dermis.net/bilder/CD003/550px/img0040.jpg>  
<https://www.dermis.net/bilder/CD008/550px/img0049.jpg>  
<https://www.dermis.net/bilder/CD014/550px/img0061.jpg>  
<https://www.dermis.net/bilder/CD014/550px/img0062.jpg>  
<https://www.dermis.net/bilder/CD044/550px/img0079.jpg>  
<https://www.dermis.net/bilder/CD018/550px/img0001.jpg>  
<https://www.dermis.net/bilder/CD056/550px/img0004.jpg>  
<https://www.dermis.net/bilder/CD018/550px/img0076.jpg>  
<https://www.dermis.net/bilder/CD014/550px/img0021.jpg>  
<https://www.dermis.net/bilder/CD006/550px/img0071.jpg>  
<https://www.dermis.net/bilder/CD014/550px/img0037.jpg>  
<https://www.dermis.net/bilder/CD042/550px/img0076.jpg>  
<https://www.dermis.net/bilder/CD008/550px/img0032.jpg>  
<https://www.dermis.net/bilder/CD033/550px/img0083.jpg>  
<https://www.dermis.net/bilder/CD034/550px/img0022.jpg>  
<https://www.dermis.net/bilder/CD034/550px/img0023.jpg>  
<https://www.dermis.net/bilder/CD034/550px/img0024.jpg>  
<https://www.dermis.net/bilder/CD041/550px/img0021.jpg>  
<https://www.dermis.net/bilder/CD040/550px/img0039.jpg>  
<https://www.dermis.net/bilder/CD040/550px/img0040.jpg>  
<https://www.dermis.net/bilder/CD055/550px/img0089.jpg>  
<https://www.dermis.net/bilder/CD020/550px/img0094.jpg>  
<https://www.dermis.net/bilder/CD050/550px/img0001.jpg>  
<https://www.dermis.net/bilder/CD049/550px/img0049.jpg>

<https://www.dermis.net/bilder/CD050/550px/img0006.jpg>  
<https://www.dermis.net/bilder/CD047/550px/img0076.jpg>  
<https://www.dermis.net/bilder/CD037/550px/img0049.jpg>  
<https://www.dermis.net/bilder/CD024/550px/img0090.jpg>  
<https://www.dermis.net/bilder/CD049/550px/img0080.jpg>  
<https://www.dermis.net/bilder/CD047/550px/img0074.jpg>  
<https://www.dermis.net/bilder/CD047/550px/img0075.jpg>  
<https://www.dermis.net/bilder/CD024/550px/img0020.jpg>  
<https://www.dermis.net/bilder/CD037/550px/img0051.jpg>  
<https://www.dermis.net/bilder/CD024/550px/img0095.jpg>  
<https://www.dermis.net/bilder/CD028/550px/img0038.jpg>  
<https://www.dermis.net/bilder/CD028/550px/img0040.jpg>  
<https://www.dermis.net/bilder/CD036/550px/img0057.jpg>  
<https://www.dermis.net/bilder/CD028/550px/img0042.jpg>  
<https://www.dermis.net/bilder/CD028/550px/img0043.jpg>  
<https://www.dermis.net/bilder/CD019/550px/img0006.jpg>  
<https://www.dermis.net/bilder/CD019/550px/img0007.jpg>  
<https://www.dermis.net/bilder/CD028/550px/img0041.jpg>  
<https://www.dermis.net/bilder/CD026/550px/img0035.jpg>  
<https://www.dermis.net/bilder/CD039/550px/img0078.jpg>  
<https://www.dermis.net/bilder/CD039/550px/img0079.jpg>  
<https://www.dermis.net/bilder/CD051/550px/img0023.jpg>  
<https://www.dermis.net/bilder/CD042/550px/img0021.jpg>  
<https://www.dermis.net/bilder/CD024/550px/img0100.jpg>  
<https://www.dermis.net/bilder/CD034/550px/img0090.jpg>  
<https://www.dermis.net/bilder/CD019/550px/img0001.jpg>  
<https://www.dermis.net/bilder/CD019/550px/img0002.jpg>  
<https://www.dermis.net/bilder/CD058/550px/img0022.jpg>  
<https://www.dermis.net/bilder/CD005/550px/img0073.jpg>  
<https://www.dermis.net/bilder/CD003/550px/img0023.jpg>  
<https://www.dermis.net/bilder/CD003/550px/img0024.jpg>  
<https://www.dermis.net/bilder/CD014/550px/img0058.jpg>  
<https://www.dermis.net/bilder/CD021/550px/img0073.jpg>  
<https://www.dermis.net/bilder/CD032/550px/img0094.jpg>  
<https://www.dermis.net/bilder/CD032/550px/img0095.jpg>  
<https://www.dermis.net/bilder/CD004/550px/img0019.jpg>  
<https://www.dermis.net/bilder/CD004/550px/img0020.jpg>  
<https://www.dermis.net/bilder/CD018/550px/img0006.jpg>  
<https://www.dermis.net/bilder/CD004/550px/img0018.jpg>  
<https://www.dermis.net/bilder/CD014/550px/img0060.jpg>  
<https://www.dermis.net/bilder/CD018/550px/img0087.jpg>  
<https://www.dermis.net/bilder/CD018/550px/img0011.jpg>  
<https://www.dermis.net/bilder/CD039/550px/img0013.jpg>  
<https://www.dermis.net/bilder/CD039/550px/img0014.jpg>  
<https://www.dermis.net/bilder/CD039/550px/img0015.jpg>  
<https://www.dermis.net/bilder/CD004/550px/img0061.jpg>  
<https://www.dermis.net/bilder/CD039/550px/img0058.jpg>  
<https://www.dermis.net/bilder/CD004/550px/img0062.jpg>



<https://www.dermis.net/bilder/CD007/550px/img0050.jpg>  
<https://www.dermis.net/bilder/CD049/550px/img0057.jpg>  
<https://www.dermis.net/bilder/CD007/550px/img0055.jpg>  
<https://www.dermis.net/bilder/CD054/550px/img0058.jpg>  
<https://www.dermis.net/bilder/CD036/550px/img0100.jpg>  
<https://www.dermis.net/bilder/CD044/550px/img0030.jpg>  
<https://www.dermis.net/bilder/CD054/550px/img0071.jpg>  
<https://www.dermis.net/bilder/CD054/550px/img0072.jpg>  
<https://www.dermis.net/bilder/CD006/550px/img0059.jpg>  
<https://www.dermis.net/bilder/CD015/550px/img0007.jpg>  
<https://www.dermis.net/bilder/CD047/550px/img0088.jpg>  
<https://www.dermis.net/bilder/CD005/550px/img0079.jpg>  
<https://www.dermis.net/bilder/CD018/550px/img0089.jpg>  
<https://www.dermis.net/bilder/CD018/550px/img0088.jpg>  
<https://www.dermis.net/bilder/CD032/550px/img0019.jpg>  
<https://www.dermis.net/bilder/CD032/550px/img0020.jpg>  
<https://www.dermis.net/bilder/CD032/550px/img0021.jpg>  
<https://www.dermis.net/bilder/CD046/550px/img0061.jpg>  
<https://www.dermis.net/bilder/CD046/550px/img0067.jpg>  
<https://www.dermis.net/bilder/CD046/550px/img0068.jpg>  
<https://www.dermis.net/bilder/CD018/550px/img0077.jpg>  
<https://www.dermis.net/bilder/CD023/550px/img0081.jpg>  
<https://www.dermis.net/bilder/CD023/550px/img0082.jpg>  
<https://www.dermis.net/bilder/CD024/550px/img0028.jpg>  
<https://www.dermis.net/bilder/CD008/550px/img0039.jpg>  
<https://www.dermis.net/bilder/CD026/550px/img0085.jpg>  
<https://www.dermis.net/bilder/CD056/550px/img0032.jpg>  
<https://www.dermis.net/bilder/CD044/550px/img0068.jpg>  
<https://www.dermis.net/bilder/CD044/550px/img0050.jpg>  
<https://www.dermis.net/bilder/CD020/550px/img0006.jpg>  
<https://www.dermis.net/bilder/CD020/550px/img0007.jpg>  
<https://www.dermis.net/bilder/CD050/550px/img0038.jpg>  
<https://www.dermis.net/bilder/CD050/550px/img0039.jpg>  
<https://www.dermis.net/bilder/CD032/550px/img0016.jpg>  
<https://www.dermis.net/bilder/CD032/550px/img0017.jpg>  
<https://www.dermis.net/bilder/CD052/550px/img0059.jpg>  
<https://www.dermis.net/bilder/CD051/550px/img0079.jpg>  
<https://www.dermis.net/bilder/CD005/550px/img0086.jpg>  
<https://www.dermis.net/bilder/CD005/550px/img0096.jpg>  
<https://www.dermis.net/bilder/CD004/550px/img0051.jpg>  
<https://www.dermis.net/bilder/CD005/550px/img0047.jpg>  
<https://www.dermis.net/bilder/CD005/550px/img0049.jpg>  
<https://www.dermis.net/bilder/CD023/550px/img0068.jpg>  
<https://www.dermis.net/bilder/CD004/550px/img0097.jpg>  
<https://www.dermis.net/bilder/CD023/550px/img0085.jpg>  
<https://www.dermis.net/bilder/CD023/550px/img0086.jpg>  
<https://www.dermis.net/bilder/CD017/550px/img0083.jpg>  
<https://www.dermis.net/bilder/CD039/550px/img0071.jpg>

<https://www.dermis.net/bilder/CD039/550px/img0072.jpg>  
<https://www.dermis.net/bilder/CD042/550px/img0072.jpg>  
<https://www.dermis.net/bilder/CD032/550px/img0098.jpg>  
<https://www.dermis.net/bilder/CD032/550px/img0099.jpg>  
<https://www.dermis.net/bilder/CD039/550px/img0073.jpg>  
<https://www.dermis.net/bilder/CD035/550px/img0049.jpg>  
<https://www.dermis.net/bilder/CD035/550px/img0050.jpg>  
<https://www.dermis.net/bilder/CD036/550px/img0078.jpg>  
<https://www.dermis.net/bilder/CD051/550px/img0080.jpg>  
<https://www.dermis.net/bilder/CD033/550px/img0097.jpg>  
<https://www.dermis.net/bilder/CD036/550px/img0075.jpg>  
<https://www.dermis.net/bilder/CD036/550px/img0076.jpg>  
<https://www.dermis.net/bilder/CD036/550px/img0077.jpg>  
<https://www.dermis.net/bilder/CD015/550px/img0039.jpg>  
<https://www.dermis.net/bilder/CD004/550px/img0022.jpg>  
<https://www.dermis.net/bilder/CD015/550px/img0040.jpg>  
<https://www.dermis.net/bilder/CD044/550px/img0054.jpg>  
<https://www.dermis.net/bilder/CD027/550px/img0007.jpg>  
<https://www.dermis.net/bilder/CD024/550px/img0053.jpg>  
<https://www.dermis.net/bilder/CD024/550px/img0054.jpg>  
<https://www.dermis.net/bilder/CD024/550px/img0055.jpg>  
<https://www.dermis.net/bilder/CD024/550px/img0057.jpg>  
<https://www.dermis.net/bilder/CD027/550px/img0009.jpg>  
<https://www.dermis.net/bilder/CD007/550px/img0006.jpg>  
<https://www.dermis.net/bilder/CD046/550px/img0076.jpg>  
<https://www.dermis.net/bilder/CD034/550px/img0051.jpg>  
<https://www.dermis.net/bilder/CD032/550px/img0034.jpg>  
<https://www.dermis.net/bilder/CD032/550px/img0035.jpg>  
<https://www.dermis.net/bilder/CD003/550px/img0036.jpg>  
<https://www.dermis.net/bilder/CD054/550px/img0019.jpg>  
<https://www.dermis.net/bilder/CD048/550px/img0085.jpg>  
<https://www.dermis.net/bilder/CD032/550px/img0033.jpg>  
<https://www.dermis.net/bilder/CD023/550px/img0005.jpg>  
<https://www.dermis.net/bilder/CD023/550px/img0006.jpg>  
<https://www.dermis.net/bilder/CD026/550px/img0095.jpg>  
<https://www.dermis.net/bilder/CD026/550px/img0096.jpg>  
<https://www.dermis.net/bilder/CD020/550px/img0081.jpg>  
<https://www.dermis.net/bilder/CD020/550px/img0082.jpg>  
<https://www.dermis.net/bilder/CD025/550px/img0024.jpg>  
<https://www.dermis.net/bilder/CD008/550px/img0066.jpg>  
<https://www.dermis.net/bilder/CD034/550px/img0041.jpg>  
<https://www.dermis.net/bilder/CD047/550px/img0068.jpg>  
<https://www.dermis.net/bilder/CD041/550px/img0016.jpg>  
<https://www.dermis.net/bilder/CD039/550px/img0066.jpg>  
<https://www.dermis.net/bilder/CD039/550px/img0067.jpg>  
<https://www.dermis.net/bilder/CD039/550px/img0068.jpg>  
<https://www.dermis.net/bilder/CD039/550px/img0069.jpg>  
<https://www.dermis.net/bilder/CD039/550px/img0070.jpg>

<https://www.dermis.net/bilder/CD034/550px/img0042.jpg>  
<https://www.dermis.net/bilder/CD050/550px/img0098.jpg>  
<https://www.dermis.net/bilder/CD050/550px/img0099.jpg>  
<https://www.dermis.net/bilder/CD047/550px/img0067.jpg>  
<https://www.dermis.net/bilder/CD037/550px/img0007.jpg>  
<https://www.dermis.net/bilder/CD007/550px/img0007.jpg>  
<https://www.dermis.net/bilder/CD020/550px/img0046.jpg>  
<https://www.dermis.net/bilder/CD020/550px/img0050.jpg>  
<https://www.dermis.net/bilder/CD020/550px/img0049.jpg>  
<https://www.dermis.net/bilder/CD047/550px/img0100.jpg>  
<https://www.dermis.net/bilder/CD032/550px/img0081.jpg>  
<https://www.dermis.net/bilder/CD032/550px/img0082.jpg>  
<https://www.dermis.net/bilder/CD040/550px/img0038.jpg>  
<https://www.dermis.net/bilder/CD008/550px/img0046.jpg>  
<https://www.dermis.net/bilder/CD006/550px/img0028.jpg>  
<https://www.dermis.net/bilder/CD058/550px/img0081.jpg>  
<https://www.dermis.net/bilder/CD024/550px/img0031.jpg>  
<https://www.dermis.net/bilder/CD014/550px/img0015.jpg>  
<https://www.dermis.net/bilder/CD027/550px/img0059.jpg>  
<https://www.dermis.net/bilder/CD014/550px/img0012.jpg>  
<https://www.dermis.net/bilder/CD044/550px/img0066.jpg>  
<https://www.dermis.net/bilder/CD015/550px/img0005.jpg>  
<https://www.dermis.net/bilder/CD049/550px/img0103.jpg>  
<https://www.dermis.net/bilder/CD049/550px/img0104.jpg>  
<https://www.dermis.net/bilder/CD005/550px/img0038.jpg>  
<https://www.dermis.net/bilder/CD043/550px/img0041.jpg>  
<https://www.dermis.net/bilder/CD044/550px/img0059.jpg>  
<https://www.dermis.net/bilder/CD017/550px/img0091.jpg>  
<https://www.dermis.net/bilder/CD005/550px/img0089.jpg>  
<https://www.dermis.net/bilder/CD007/550px/img0047.jpg>  
<https://www.dermis.net/bilder/CD008/550px/img0035.jpg>  
<https://www.dermis.net/bilder/CD035/550px/img0019.jpg>  
<https://www.dermis.net/bilder/CD018/550px/img0037.jpg>  
<https://www.dermis.net/bilder/CD047/550px/img0060.jpg>  
<https://www.dermis.net/bilder/CD047/550px/img0061.jpg>  
<https://www.dermis.net/bilder/CD007/550px/img0005.jpg>  
<https://www.dermis.net/bilder/CD047/550px/img0058.jpg>  
<https://www.dermis.net/bilder/CD058/550px/img0003.jpg>  
<https://www.dermis.net/bilder/CD058/550px/img0004.jpg>  
<https://www.dermis.net/bilder/CD035/550px/img0060.jpg>  
<https://www.dermis.net/bilder/CD035/550px/img0061.jpg>  
<https://www.dermis.net/bilder/CD036/550px/img0066.jpg>  
<https://www.dermis.net/bilder/CD020/550px/img0095.jpg>  
<https://www.dermis.net/bilder/CD039/550px/img0001.jpg>  
<https://www.dermis.net/bilder/CD058/550px/img0054.jpg>  
<https://www.dermis.net/bilder/CD052/550px/img0032.jpg>  
<https://www.dermis.net/bilder/CD052/550px/img0022.jpg>  
<https://www.dermis.net/bilder/CD034/550px/img0078.jpg>

<https://www.dermis.net/bilder/CD026/550px/img0063.jpg>  
<https://www.dermis.net/bilder/CD026/550px/img0064.jpg>  
<https://www.dermis.net/bilder/CD026/550px/img0043.jpg>  
<https://www.dermis.net/bilder/CD032/550px/img0070.jpg>  
<https://www.dermis.net/bilder/CD018/550px/img0093.jpg>  
<https://www.dermis.net/bilder/CD050/550px/img0037.jpg>  
<https://www.dermis.net/bilder/CD050/550px/img0044.jpg>  
<https://www.dermis.net/bilder/CD044/550px/img0062.jpg>  
<https://www.dermis.net/bilder/CD049/550px/img0067.jpg>  
<https://www.dermis.net/bilder/CD049/550px/img0068.jpg>  
<https://www.dermis.net/bilder/CD003/550px/img0021.jpg>  
<https://www.dermis.net/bilder/CD037/550px/img0024.jpg>  
<https://www.dermis.net/bilder/CD098/550px/img0063.jpg>  
<https://www.dermis.net/bilder/CD002/550px/img0064.jpg>  
<https://www.dermis.net/bilder/CD016/550px/img0019.jpg>  
<https://www.dermis.net/bilder/CD036/550px/img0050.jpg>  
<https://www.dermis.net/bilder/CD212/550px/img0119.jpg>  
<https://www.dermis.net/bilder/CD212/550px/img0019.jpg>  
<https://www.dermis.net/bilder/CD054/550px/img0042.jpg>  
<https://www.dermis.net/bilder/CD054/550px/img0043.jpg>  
<https://www.dermis.net/bilder/CD033/550px/img0038.jpg>  
<https://www.dermis.net/bilder/CD041/550px/img0064.jpg>  
<https://www.dermis.net/bilder/CD042/550px/img0073.jpg>  
<https://www.dermis.net/bilder/CD195/550px/img0054.jpg>  
<https://www.dermis.net/bilder/CD011/550px/img0004.jpg>  
<https://www.dermis.net/bilder/CD011/550px/img0005.jpg>  
<https://www.dermis.net/bilder/CD012/550px/img0024.jpg>  
<https://www.dermis.net/bilder/CD210/550px/img0026.jpg>  
<https://www.dermis.net/bilder/CD182/550px/img0013.jpg>  
<https://www.dermis.net/bilder/CD182/550px/img0012.jpg>  
<https://www.dermis.net/bilder/CD192/550px/img0095.jpg>  
<https://www.dermis.net/bilder/CD055/550px/img0050.jpg>  
<https://www.dermis.net/bilder/CD190/550px/img0043.jpg>  
<https://www.dermis.net/bilder/CD202/550px/img0016.jpg>  
<https://www.dermis.net/bilder/CD192/550px/img0010.jpg>  
<https://www.dermis.net/bilder/CD210/550px/img0120.jpg>  
<https://www.dermis.net/bilder/CD193/550px/img0010.jpg>  
<https://www.dermis.net/bilder/CD198/550px/img0180.jpg>  
<https://www.dermis.net/bilder/CD198/550px/img0181.jpg>  
<https://www.dermis.net/bilder/CD041/550px/img0055.jpg>  
<https://www.dermis.net/bilder/CD012/550px/img0078.jpg>  
<https://www.dermis.net/bilder/CD184/550px/img0080.jpg>  
<https://www.dermis.net/bilder/CD194/550px/img0157.jpg>  
<https://www.dermis.net/bilder/CD194/550px/img0158.jpg>  
<https://www.dermis.net/bilder/CD194/550px/img0159.jpg>  
<https://www.dermis.net/bilder/CD194/550px/img0160.jpg>  
<https://www.dermis.net/bilder/CD025/550px/img0023.jpg>  
<https://www.dermis.net/bilder/CD017/550px/img0040.jpg>

<https://www.dermis.net/bilder/CD178/550px/img0062.jpg>  
<https://www.dermis.net/bilder/CD035/550px/img0076.jpg>  
<https://www.dermis.net/bilder/CD027/550px/img0017.jpg>  
<https://www.dermis.net/bilder/CD007/550px/img0019.jpg>  
<https://www.dermis.net/bilder/CD185/550px/img0012.jpg>  
<https://www.dermis.net/bilder/CD185/550px/img0013.jpg>  
<https://www.dermis.net/bilder/CD211/550px/img0066.jpg>  
<https://www.dermis.net/bilder/CD027/550px/img0024.jpg>  
<https://www.dermis.net/bilder/CD192/550px/img0016.jpg>  
<https://www.dermis.net/bilder/CD055/550px/img0076.jpg>  
<https://www.dermis.net/bilder/CD055/550px/img0077.jpg>  
<https://www.dermis.net/bilder/CD185/550px/img0098.jpg>  
<https://www.dermis.net/bilder/CD193/550px/img0011.jpg>  
<https://www.dermis.net/bilder/CD196/550px/img0151.jpg>  
<https://www.dermis.net/bilder/CD196/550px/img0152.jpg>  
<https://www.dermis.net/bilder/CD210/550px/img0053.jpg>  
<https://www.dermis.net/bilder/CD186/550px/img0022.jpg>  
<https://www.dermis.net/bilder/CD195/550px/img0109.jpg>  
<https://www.dermis.net/bilder/CD196/550px/img0126.jpg>  
<https://www.dermis.net/bilder/CD193/550px/img0028.jpg>  
<https://www.dermis.net/bilder/CD070/550px/img0009.jpg>  
<https://www.dermis.net/bilder/CD003/550px/img0066.jpg>  
<https://www.dermis.net/bilder/CD002/550px/img0054.jpg>  
<https://www.dermis.net/bilder/CD185/550px/img0015.jpg>  
<https://www.dermis.net/bilder/CD193/550px/img0026.jpg>  
<https://www.dermis.net/bilder/CD184/550px/img0008.jpg>  
<https://www.dermis.net/bilder/CD184/550px/img0095.jpg>  
<https://www.dermis.net/bilder/CD051/550px/img0002.jpg>  
<https://www.dermis.net/bilder/CD197/550px/img0056.jpg>  
<https://www.dermis.net/bilder/CD197/550px/img0057.jpg>  
<https://www.dermis.net/bilder/CD193/550px/img0022.jpg>  
<https://www.dermis.net/bilder/CD043/550px/img0043.jpg>  
<https://www.dermis.net/bilder/CD180/550px/img0053.jpg>  
<https://www.dermis.net/bilder/CD194/550px/img0145.jpg>  
<https://www.dermis.net/bilder/CD202/550px/img0027.jpg>  
<https://www.dermis.net/bilder/CD199/550px/img0109.jpg>  
<https://www.dermis.net/bilder/CD199/550px/img0110.jpg>  
<https://www.dermis.net/bilder/CD193/550px/img0102.jpg>  
<https://www.dermis.net/bilder/CD193/550px/img0103.jpg>  
<https://www.dermis.net/bilder/CD191/550px/img0053.jpg>  
<https://www.dermis.net/bilder/CD191/550px/img0054.jpg>  
<https://www.dermis.net/bilder/CD191/550px/img0055.jpg>  
<https://www.dermis.net/bilder/CD021/550px/img0053.jpg>  
<https://www.dermis.net/bilder/CD192/550px/img0094.jpg>  
<https://www.dermis.net/bilder/CD007/550px/img0112.jpg>  
<https://www.dermis.net/bilder/CD055/550px/img0079.jpg>  
<https://www.dermis.net/bilder/CD055/550px/img0080.jpg>  
<https://www.dermis.net/bilder/CD187/550px/img0018.jpg>

<https://www.dermis.net/bilder/CD187/550px/img0019.jpg>  
<https://www.dermis.net/bilder/CD187/550px/img0020.jpg>  
<https://www.dermis.net/bilder/CD040/550px/img0025.jpg>  
<https://www.dermis.net/bilder/CD182/550px/img0060.jpg>  
<https://www.dermis.net/bilder/CD196/550px/img0091.jpg>  
<https://www.dermis.net/bilder/CD195/550px/img0013.jpg>  
<https://www.dermis.net/bilder/CD071/550px/img0002.jpg>  
<https://www.dermis.net/bilder/CD035/550px/img0084.jpg>  
<https://www.dermis.net/bilder/CD189/550px/img0031.jpg>  
<https://www.dermis.net/bilder/CD189/550px/img0032.jpg>  
<https://www.dermis.net/bilder/CD187/550px/img0089.jpg>  
<https://www.dermis.net/bilder/CD187/550px/img0090.jpg>  
<https://www.dermis.net/bilder/CD008/550px/img0042.jpg>  
<https://www.dermis.net/bilder/CD193/550px/img0007.jpg>  
<https://www.dermis.net/bilder/CD003/550px/img0080.jpg>  
<https://www.dermis.net/bilder/CD033/550px/img0012.jpg>  
<https://www.dermis.net/bilder/CD003/550px/img0048.jpg>  
<https://www.dermis.net/bilder/CD025/550px/img0022.jpg>  
<https://www.dermis.net/bilder/CD002/550px/img0057.jpg>  
<https://www.dermis.net/bilder/CD021/550px/img0020.jpg>  
<https://www.dermis.net/bilder/CD021/550px/img0021.jpg>  
<https://www.dermis.net/bilder/CD021/550px/img0040.jpg>  
<https://www.dermis.net/bilder/CD021/550px/img0047.jpg>  
<https://www.dermis.net/bilder/CD194/550px/img0149.jpg>  
<https://www.dermis.net/bilder/CD021/550px/img0003.jpg>  
<https://www.dermis.net/bilder/CD191/550px/img0067.jpg>  
<https://www.dermis.net/bilder/CD193/550px/img0140.jpg>  
<https://www.dermis.net/bilder/CD002/550px/img0067.jpg>  
<https://www.dermis.net/bilder/CD004/550px/img0073.jpg>  
<https://www.dermis.net/bilder/CD008/550px/img0007.jpg>  
<https://www.dermis.net/bilder/CD182/550px/img0037.jpg>  
<https://www.dermis.net/bilder/CD182/550px/img0038.jpg>  
<https://www.dermis.net/bilder/CD178/550px/img0069.jpg>  
<https://www.dermis.net/bilder/CD191/550px/img0114.jpg>  
<https://www.dermis.net/bilder/CD191/550px/img0115.jpg>  
<https://www.dermis.net/bilder/CD191/550px/img0118.jpg>  
<https://www.dermis.net/bilder/CD193/550px/img0118.jpg>  
<https://www.dermis.net/bilder/CD193/550px/img0123.jpg>  
<https://www.dermis.net/bilder/CD193/550px/img0124.jpg>  
<https://www.dermis.net/bilder/CD199/550px/img0105.jpg>  
<https://www.dermis.net/bilder/CD180/550px/img0054.jpg>  
<https://www.dermis.net/bilder/CD195/550px/img0014.jpg>  
<https://www.dermis.net/bilder/CD195/550px/img0015.jpg>  
<https://www.dermis.net/bilder/CD210/550px/img0096.jpg>  
<https://www.dermis.net/bilder/CD210/550px/img0097.jpg>  
<https://www.dermis.net/bilder/CD186/550px/img0015.jpg>  
<https://www.dermis.net/bilder/CD055/550px/img0067.jpg>  
<https://www.dermis.net/bilder/CD033/550px/img0009.jpg>

<https://www.dermis.net/bilder/CD041/550px/img0042.jpg>  
<https://www.dermis.net/bilder/CD040/550px/img0103.jpg>  
<https://www.dermis.net/bilder/CD036/550px/img0101.jpg>  
<https://www.dermis.net/bilder/CD052/550px/img0070.jpg>  
<https://www.dermis.net/bilder/CD211/550px/img0017.jpg>  
<https://www.dermis.net/bilder/CD199/550px/img0037.jpg>  
<https://www.dermis.net/bilder/CD180/550px/img0047.jpg>  
<https://www.dermis.net/bilder/CD040/550px/img0071.jpg>  
<https://www.dermis.net/bilder/CD040/550px/img0072.jpg>  
<https://www.dermis.net/bilder/CD210/550px/img0024.jpg>  
<https://www.dermis.net/bilder/CD040/550px/img0075.jpg>  
<https://www.dermis.net/bilder/CD185/550px/img0073.jpg>  
<https://www.dermis.net/bilder/CD185/550px/img0074.jpg>  
<https://www.dermis.net/bilder/CD185/550px/img0075.jpg>  
<https://www.dermis.net/bilder/CD185/550px/img0076.jpg>  
<https://www.dermis.net/bilder/CD201/550px/img0036.jpg>  
<https://www.dermis.net/bilder/CD196/550px/img0022.jpg>  
<https://www.dermis.net/bilder/CD199/550px/img0108.jpg>  
<https://www.dermis.net/bilder/CD180/550px/img0058.jpg>  
<https://www.dermis.net/bilder/CD180/550px/img0057.jpg>  
<https://www.dermis.net/bilder/CD212/550px/img0057.jpg>  
<https://www.dermis.net/bilder/CD044/550px/img0080.jpg>  
<https://www.dermis.net/bilder/CD196/550px/img0092.jpg>  
<https://www.dermis.net/bilder/CD196/550px/img0093.jpg>  
<https://www.dermis.net/bilder/CD196/550px/img0149.jpg>  
<https://www.dermis.net/bilder/CD017/550px/img0096.jpg>  
<https://www.dermis.net/bilder/CD194/550px/img0073.jpg>  
<https://www.dermis.net/bilder/CD194/550px/img0074.jpg>  
<https://www.dermis.net/bilder/CD041/550px/img0054.jpg>  
<https://www.dermis.net/bilder/CD193/550px/img0082.jpg>  
<https://www.dermis.net/bilder/CD189/550px/img0089.jpg>  
<https://www.dermis.net/bilder/CD196/550px/img0063.jpg>  
<https://www.dermis.net/bilder/CD189/550px/img0098.jpg>  
<https://www.dermis.net/bilder/CD189/550px/img0099.jpg>  
<https://www.dermis.net/bilder/CD199/550px/img0111.jpg>  
<https://www.dermis.net/bilder/CD183/550px/img0077.jpg>  
<https://www.dermis.net/bilder/CD193/550px/img0072.jpg>  
<https://www.dermis.net/bilder/CD036/550px/img0070.jpg>  
<https://www.dermis.net/bilder/CD002/550px/img0085.jpg>  
<https://www.dermis.net/bilder/CD033/550px/img0026.jpg>  
<https://www.dermis.net/bilder/CD181/550px/img0066.jpg>  
<https://www.dermis.net/bilder/CD036/550px/img0048.jpg>  
<https://www.dermis.net/bilder/CD191/550px/img0015.jpg>  
<https://www.dermis.net/bilder/CD184/550px/img0094.jpg>  
<https://www.dermis.net/bilder/CD183/550px/img0047.jpg>  
<https://www.dermis.net/bilder/CD180/550px/img0046.jpg>  
<https://www.dermis.net/bilder/CD180/550px/img0077.jpg>  
<https://www.dermis.net/bilder/CD180/550px/img0078.jpg>

<https://www.dermis.net/bilder/CD180/550px/img0076.jpg>  
<https://www.dermis.net/bilder/CD212/550px/img0036.jpg>  
<https://www.dermis.net/bilder/CD212/550px/img0037.jpg>  
<https://www.dermis.net/bilder/CD055/550px/img0049.jpg>  
<https://www.dermis.net/bilder/CD183/550px/img0089.jpg>  
<https://www.dermis.net/bilder/CD013/550px/img0002.jpg>  
<https://www.dermis.net/bilder/CD188/550px/img0006.jpg>  
<https://www.dermis.net/bilder/CD188/550px/img0007.jpg>  
<https://www.dermis.net/bilder/CD188/550px/img0008.jpg>  
<https://www.dermis.net/bilder/CD021/550px/img0037.jpg>  
<https://www.dermis.net/bilder/CD182/550px/img0036.jpg>  
<https://www.dermis.net/bilder/CD182/550px/img0035.jpg>  
<https://www.dermis.net/bilder/CD190/550px/img0057.jpg>  
<https://www.dermis.net/bilder/CD193/550px/img0116.jpg>  
<https://www.dermis.net/bilder/CD181/550px/img0024.jpg>  
<https://www.dermis.net/bilder/CD181/550px/img0023.jpg>  
<https://www.dermis.net/bilder/CD186/550px/img0020.jpg>  
<https://www.dermis.net/bilder/CD186/550px/img0021.jpg>  
<https://www.dermis.net/bilder/CD041/550px/img0068.jpg>  
<https://www.dermis.net/bilder/CD016/550px/img0021.jpg>  
<https://www.dermis.net/bilder/CD211/550px/img0082.jpg>  
<https://www.dermis.net/bilder/CD192/550px/img0030.jpg>  
<https://www.dermis.net/bilder/CD199/550px/img0041.jpg>  
<https://www.dermis.net/bilder/CD199/550px/img0043.jpg>  
<https://www.dermis.net/bilder/CD184/550px/img0085.jpg>  
<https://www.dermis.net/bilder/CD184/550px/img0063.jpg>  
<https://www.dermis.net/bilder/CD005/550px/img0002.jpg>  
<https://www.dermis.net/bilder/CD193/550px/img0023.jpg>  
<https://www.dermis.net/bilder/CD196/550px/img0023.jpg>  
<https://www.dermis.net/bilder/CD199/550px/img0137.jpg>  
<https://www.dermis.net/bilder/CD199/550px/img0138.jpg>  
<https://www.dermis.net/bilder/CD008/550px/img0077.jpg>  
<https://www.dermis.net/bilder/CD179/550px/img0021.jpg>  
<https://www.dermis.net/bilder/CD179/550px/img0022.jpg>  
<https://www.dermis.net/bilder/CD191/550px/img0096.jpg>  
<https://www.dermis.net/bilder/CD017/550px/img0101.jpg>  
<https://www.dermis.net/bilder/CD198/550px/img0177.jpg>  
<https://www.dermis.net/bilder/CD008/550px/img0036.jpg>  
<https://www.dermis.net/bilder/CD017/550px/img0085.jpg>  
<https://www.dermis.net/bilder/CD211/550px/img0081.jpg>  
<https://www.dermis.net/bilder/CD192/550px/img0075.jpg>  
<https://www.dermis.net/bilder/CD181/550px/img0082.jpg>  
<https://www.dermis.net/bilder/CD008/550px/img0080.jpg>  
<https://www.dermis.net/bilder/CD002/550px/img0086.jpg>  
<https://www.dermis.net/bilder/CD071/550px/img0037.jpg>  
<https://www.dermis.net/bilder/CD199/550px/img0132.jpg>  
<https://www.dermis.net/bilder/CD041/550px/img0041.jpg>  
<https://www.dermis.net/bilder/CD199/550px/img0133.jpg>



<https://www.dermis.net/bilder/CD199/550px/img0042.jpg>  
<https://www.dermis.net/bilder/CD021/550px/img0042.jpg>  
<https://www.dermis.net/bilder/CD191/550px/img0100.jpg>  
<https://www.dermis.net/bilder/CD191/550px/img0101.jpg>  
<https://www.dermis.net/bilder/CD193/550px/img0107.jpg>  
<https://www.dermis.net/bilder/CD211/550px/img0026.jpg>  
<https://www.dermis.net/bilder/CD193/550px/img0030.jpg>  
<https://www.dermis.net/bilder/CD193/550px/img0031.jpg>  
<https://www.dermis.net/bilder/CD055/550px/img0095.jpg>  
<https://www.dermis.net/bilder/CD198/550px/img0082.jpg>  
<https://www.dermis.net/bilder/CD195/550px/img0022.jpg>  
<https://www.dermis.net/bilder/CD210/550px/img0052.jpg>  
<https://www.dermis.net/bilder/CD196/550px/img0122.jpg>  
<https://www.dermis.net/bilder/CD198/550px/img0073.jpg>  
<https://www.dermis.net/bilder/CD199/550px/img0134.jpg>  
<https://www.dermis.net/bilder/CD184/550px/img0030.jpg>  
<https://www.dermis.net/bilder/CD184/550px/img0031.jpg>  
<https://www.dermis.net/bilder/CD210/550px/img0121.jpg>  
<https://www.dermis.net/bilder/CD041/550px/img0070.jpg>  
<https://www.dermis.net/bilder/CD189/550px/img0047.jpg>  
<https://www.dermis.net/bilder/CD210/550px/img0123.jpg>  
<https://www.dermis.net/bilder/CD054/550px/img0044.jpg>  
<https://www.dermis.net/bilder/CD196/550px/img0144.jpg>  
<https://www.dermis.net/bilder/CD041/550px/img0045.jpg>  
<https://www.dermis.net/bilder/CD193/550px/img0193.jpg>  
<https://www.dermis.net/bilder/CD012/550px/img0089.jpg>  
<https://www.dermis.net/bilder/CD012/550px/img0090.jpg>  
<https://www.dermis.net/bilder/CD198/550px/img0148.jpg>  
<https://www.dermis.net/bilder/CD198/550px/img0150.jpg>  
<https://www.dermis.net/bilder/CD001/550px/img0014.jpg>  
<https://www.dermis.net/bilder/CD199/550px/img0078.jpg>  
<https://www.dermis.net/bilder/CD199/550px/img0079.jpg>  
<https://www.dermis.net/bilder/CD199/550px/img0080.jpg>  
<https://www.dermis.net/bilder/CD040/550px/img0036.jpg>  
<https://www.dermis.net/bilder/CD055/550px/img0083.jpg>  
<https://www.dermis.net/bilder/CD195/550px/img0051.jpg>  
<https://www.dermis.net/bilder/CD055/550px/img0084.jpg>  
<https://www.dermis.net/bilder/CD001/550px/img0061.jpg>  
<https://www.dermis.net/bilder/CD014/550px/img0073.jpg>  
<https://www.dermis.net/bilder/CD199/550px/img0130.jpg>  
<https://www.dermis.net/bilder/CD199/550px/img0131.jpg>  
<https://www.dermis.net/bilder/CD210/550px/img0058.jpg>  
<https://www.dermis.net/bilder/CD210/550px/img0059.jpg>  
<https://www.dermis.net/bilder/CD179/550px/img0024.jpg>  
<https://www.dermis.net/bilder/CD195/550px/img0090.jpg>  
<https://www.dermis.net/bilder/CD055/550px/img0081.jpg>  
<https://www.dermis.net/bilder/CD210/550px/img0054.jpg>  
<https://www.dermis.net/bilder/CD182/550px/img0031.jpg>

<https://www.dermis.net/bilder/CD035/550px/img0069.jpg>  
<https://www.dermis.net/bilder/CD199/550px/img0066.jpg>  
<https://www.dermis.net/bilder/CD199/550px/img0067.jpg>  
<https://www.dermis.net/bilder/CD199/550px/img0068.jpg>  
<https://www.dermis.net/bilder/CD181/550px/img0041.jpg>  
<https://www.dermis.net/bilder/CD181/550px/img0042.jpg>  
<https://www.dermis.net/bilder/CD184/550px/img0096.jpg>  
<https://www.dermis.net/bilder/CD040/550px/img0076.jpg>  
<https://www.dermis.net/bilder/CD014/550px/img0027.jpg>  
<https://www.dermis.net/bilder/CD054/550px/img0017.jpg>  
<https://www.dermis.net/bilder/CD192/550px/img0068.jpg>  
<https://www.dermis.net/bilder/CD196/550px/img0150.jpg>  
<https://www.dermis.net/bilder/CD026/550px/img0084.jpg>  
<https://www.dermis.net/bilder/CD188/550px/img0016.jpg>  
<https://www.dermis.net/bilder/CD188/550px/img0017.jpg>  
<https://www.dermis.net/bilder/CD188/550px/img0018.jpg>  
<https://www.dermis.net/bilder/CD187/550px/img0048.jpg>  
<https://www.dermis.net/bilder/CD187/550px/img0049.jpg>  
<https://www.dermis.net/bilder/CD187/550px/img0050.jpg>  
<https://www.dermis.net/bilder/CD187/550px/img0051.jpg>  
<https://www.dermis.net/bilder/CD187/550px/img0052.jpg>  
<https://www.dermis.net/bilder/CD191/550px/img0002.jpg>  
<https://www.dermis.net/bilder/CD021/550px/img0090.jpg>  
<https://www.dermis.net/bilder/CD055/550px/img0014.jpg>  
<https://www.dermis.net/bilder/CD181/550px/img0021.jpg>  
<https://www.dermis.net/bilder/CD181/550px/img0018.jpg>  
<https://www.dermis.net/bilder/CD056/550px/img0023.jpg>  
<https://www.dermis.net/bilder/CD185/550px/img0097.jpg>  
<https://www.dermis.net/bilder/CD187/550px/img0047.jpg>  
<https://www.dermis.net/bilder/CD212/550px/img0047.jpg>  
<https://www.dermis.net/bilder/CD008/550px/img0055.jpg>  
<https://www.dermis.net/bilder/CD181/550px/img0067.jpg>  
<https://www.dermis.net/bilder/CD185/550px/img0010.jpg>  
<https://www.dermis.net/bilder/CD193/550px/img0027.jpg>  
<https://www.dermis.net/bilder/CD212/550px/img0042.jpg>  
<https://www.dermis.net/bilder/CD212/550px/img0129.jpg>  
<https://www.dermis.net/bilder/CD201/550px/img0023.jpg>  
<https://www.dermis.net/bilder/CD199/550px/img0039.jpg>  
<https://www.dermis.net/bilder/CD199/550px/img0040.jpg>  
<https://www.dermis.net/bilder/CD182/550px/img0043.jpg>  
<https://www.dermis.net/bilder/CD184/550px/img0062.jpg>  
<https://www.dermis.net/bilder/CD194/550px/img0146.jpg>  
<https://www.dermis.net/bilder/CD194/550px/img0147.jpg>  
<https://www.dermis.net/bilder/CD193/550px/img0100.jpg>  
<https://www.dermis.net/bilder/CD191/550px/img0052.jpg>  
<https://www.dermis.net/bilder/CD055/550px/img0046.jpg>  
<https://www.dermis.net/bilder/CD183/550px/img0091.jpg>  
<https://www.dermis.net/bilder/CD196/550px/img0090.jpg>

<https://www.dermis.net/bilder/CD199/550px/img0002.jpg>  
<https://www.dermis.net/bilder/CD199/550px/img0003.jpg>  
<https://www.dermis.net/bilder/CD187/550px/img0091.jpg>  
<https://www.dermis.net/bilder/CD181/550px/img0080.jpg>  
<https://www.dermis.net/bilder/CD211/550px/img0045.jpg>  
<https://www.dermis.net/bilder/CD012/550px/img0080.jpg>  
<https://www.dermis.net/bilder/CD055/550px/img0048.jpg>  
<https://www.dermis.net/bilder/CD190/550px/img0029.jpg>  
<https://www.dermis.net/bilder/CD190/550px/img0030.jpg>  
<https://www.dermis.net/bilder/CD210/550px/img0065.jpg>  
<https://www.dermis.net/bilder/CD210/550px/img0066.jpg>  
<https://www.dermis.net/bilder/CD017/550px/img0089.jpg>  
<https://www.dermis.net/bilder/CD180/550px/img0056.jpg>  
<https://www.dermis.net/bilder/CD056/550px/img0024.jpg>  
<https://www.dermis.net/bilder/CD033/550px/img0032.jpg>  
<https://www.dermis.net/bilder/CD025/550px/img0005.jpg>  
<https://www.dermis.net/bilder/CD041/550px/img0052.jpg>  
<https://www.dermis.net/bilder/CD007/550px/img0111.jpg>  
<https://www.dermis.net/bilder/CD193/550px/img0196.jpg>  
<https://www.dermis.net/bilder/CD183/550px/img0078.jpg>  
<https://www.dermis.net/bilder/CD032/550px/img0047.jpg>  
<https://www.dermis.net/bilder/CD183/550px/img0048.jpg>  
<https://www.dermis.net/bilder/CD183/550px/img0049.jpg>  
<https://www.dermis.net/bilder/CD196/550px/img0066.jpg>  
<https://www.dermis.net/bilder/CD196/550px/img0067.jpg>  
<https://www.dermis.net/bilder/CD196/550px/img0068.jpg>  
<https://www.dermis.net/bilder/CD196/550px/img0024.jpg>  
<https://www.dermis.net/bilder/CD041/550px/img0085.jpg>  
<https://www.dermis.net/bilder/CD212/550px/img0074.jpg>  
<https://www.dermis.net/bilder/CD007/550px/img0115.jpg>  
<https://www.dermis.net/bilder/CD196/550px/img0059.jpg>  
<https://www.dermis.net/bilder/CD196/550px/img0060.jpg>  
<https://www.dermis.net/bilder/CD195/550px/img0110.jpg>  
<https://www.dermis.net/bilder/CD033/550px/img0027.jpg>  
<https://www.dermis.net/bilder/CD008/550px/img0006.jpg>  
<https://www.dermis.net/bilder/CD195/550px/img0108.jpg>  
<https://www.dermis.net/bilder/CD018/550px/img0042.jpg>  
<https://www.dermis.net/bilder/CD040/550px/img0067.jpg>  
<https://www.dermis.net/bilder/CD001/550px/img0052.jpg>  
<https://www.dermis.net/bilder/CD071/550px/img0029.jpg>  
<https://www.dermis.net/bilder/CD056/550px/img0039.jpg>  
<https://www.dermis.net/bilder/CD069/550px/img0107.jpg>  
<https://www.dermis.net/bilder/CD054/550px/img0002.jpg>  
<https://www.dermis.net/bilder/CD003/550px/img0043.jpg>  
<https://www.dermis.net/bilder/CD021/550px/img0068.jpg>  
<https://www.dermis.net/bilder/CD001/550px/img0043.jpg>  
<https://www.dermis.net/bilder/CD005/550px/img0102.jpg>  
<https://www.dermis.net/bilder/CD069/550px/img0102.jpg>

<https://www.dermis.net/bilder/CD069/550px/img0103.jpg>  
<https://www.dermis.net/bilder/CD003/550px/img0014.jpg>  
<https://www.dermis.net/bilder/CD032/550px/img0072.jpg>  
<https://www.dermis.net/bilder/CD017/550px/img0042.jpg>  
<https://www.dermis.net/bilder/CD003/550px/img0075.jpg>  
<https://www.dermis.net/bilder/CD212/550px/img0045.jpg>  
<https://www.dermis.net/bilder/CD193/550px/img0024.jpg>  
<https://www.dermis.net/bilder/CD210/550px/img0025.jpg>  
<https://www.dermis.net/bilder/CD189/550px/img0008.jpg>  
<https://www.dermis.net/bilder/CD054/550px/img0007.jpg>  
<https://www.dermis.net/bilder/CD194/550px/img0099.jpg>  
<https://www.dermis.net/bilder/CD004/550px/img0060.jpg>  
<https://www.dermis.net/bilder/CD042/550px/img0067.jpg>  
<https://www.dermis.net/bilder/CD199/550px/img0038.jpg>  
<https://www.dermis.net/bilder/CD211/550px/img0084.jpg>  
<https://www.dermis.net/bilder/CD022/550px/img0001.jpg>  
<https://www.dermis.net/bilder/CD003/550px/img0083.jpg>  
<https://www.dermis.net/bilder/CD040/550px/img0033.jpg>  
<https://www.dermis.net/bilder/CD044/550px/img0058.jpg>  
<https://www.dermis.net/bilder/CD017/550px/img0100.jpg>  
<https://www.dermis.net/bilder/CD054/550px/img0066.jpg>  
<https://www.dermis.net/bilder/CD014/550px/img0024.jpg>  
<https://www.dermis.net/bilder/CD197/550px/img0008.jpg>  
<https://www.dermis.net/bilder/CD197/550px/img0009.jpg>  
<https://www.dermis.net/bilder/CD198/550px/img0173.jpg>  
<https://www.dermis.net/bilder/CD211/550px/img0078.jpg>  
<https://www.dermis.net/bilder/CD210/550px/img0122.jpg>  
<https://www.dermis.net/bilder/CD014/550px/img0036.jpg>  
<https://www.dermis.net/bilder/CD002/550px/img0061.jpg>  
<https://www.dermis.net/bilder/CD004/550px/img0053.jpg>  
<https://www.dermis.net/bilder/CD048/550px/img0086.jpg>  
<https://www.dermis.net/bilder/CD002/550px/img0078.jpg>  
<https://www.dermis.net/bilder/CD054/550px/img0067.jpg>  
<https://www.dermis.net/bilder/CD041/550px/img0083.jpg>  
<https://www.dermis.net/bilder/CD040/550px/img0056.jpg>  
<https://www.dermis.net/bilder/CD071/550px/img0021.jpg>  
<https://www.dermis.net/bilder/CD050/550px/img0096.jpg>  
<https://www.dermis.net/bilder/CD005/550px/img0097.jpg>  
<https://www.dermis.net/bilder/CD069/550px/img0093.jpg>  
<https://www.dermis.net/bilder/CD025/550px/img0045.jpg>  
<https://www.dermis.net/bilder/CD070/550px/img0096.jpg>  
<https://www.dermis.net/bilder/CD071/550px/img0015.jpg>  
<https://www.dermis.net/bilder/CD070/550px/img0046.jpg>  
<https://www.dermis.net/bilder/CD070/550px/img0047.jpg>  
<https://www.dermis.net/bilder/CD069/550px/img0111.jpg>  
<https://www.dermis.net/bilder/CD025/550px/img0046.jpg>  
<https://www.dermis.net/bilder/CD070/550px/img0045.jpg>  
<https://www.dermis.net/bilder/CD021/550px/img0089.jpg>

<https://www.dermis.net/bilder/CD040/550px/img0018.jpg>  
<https://www.dermis.net/bilder/CD040/550px/img0019.jpg>  
<https://www.dermis.net/bilder/CD005/550px/img0048.jpg>  
<https://www.dermis.net/bilder/CD004/550px/img0030.jpg>  
<https://www.dermis.net/bilder/CD006/550px/img0037.jpg>  
<https://www.dermis.net/bilder/CD056/550px/img0051.jpg>  
<https://www.dermis.net/bilder/CD026/550px/img0069.jpg>  
<https://www.dermis.net/bilder/CD026/550px/img0068.jpg>  
<https://www.dermis.net/bilder/CD026/550px/img0070.jpg>  
<https://www.dermis.net/bilder/CD054/550px/img0103.jpg>  
<https://www.dermis.net/bilder/CD054/550px/img0104.jpg>  
<https://www.dermis.net/bilder/CD001/550px/img0035.jpg>  
<https://www.dermis.net/bilder/CD020/550px/img0037.jpg>  
<https://www.dermis.net/bilder/CD020/550px/img0039.jpg>  
<https://www.dermis.net/bilder/CD054/550px/img0069.jpg>  
<https://www.dermis.net/bilder/CD054/550px/img0070.jpg>  
<https://www.dermis.net/bilder/CD028/550px/img0003.jpg>  
<https://www.dermis.net/bilder/CD028/550px/img0004.jpg>  
<https://www.dermis.net/bilder/CD014/550px/img0088.jpg>  
<https://www.dermis.net/bilder/CD014/550px/img0087.jpg>  
<https://www.dermis.net/bilder/CD018/550px/img0066.jpg>  
<https://www.dermis.net/bilder/CD070/550px/img0084.jpg>  
<https://www.dermis.net/bilder/CD028/550px/img0010.jpg>  
<https://www.dermis.net/bilder/CD028/550px/img0009.jpg>  
<https://www.dermis.net/bilder/CD004/550px/img0049.jpg>  
<https://www.dermis.net/bilder/CD070/550px/img0042.jpg>  
<https://www.dermis.net/bilder/CD070/550px/img0043.jpg>  
<https://www.dermis.net/bilder/CD050/550px/img0029.jpg>  
<https://www.dermis.net/bilder/CD050/550px/img0035.jpg>  
<https://www.dermis.net/bilder/CD050/550px/img0036.jpg>  
<https://www.dermis.net/bilder/CD035/550px/img0025.jpg>  
<https://www.dermis.net/bilder/CD028/550px/img0011.jpg>  
<https://www.dermis.net/bilder/CD047/550px/img0017.jpg>  
<https://www.dermis.net/bilder/CD001/550px/img0026.jpg>  
<https://www.dermis.net/bilder/CD056/550px/img0058.jpg>  
<https://www.dermis.net/bilder/CD071/550px/img0011.jpg>  
<https://www.dermis.net/bilder/CD057/550px/img0009.jpg>  
<https://www.dermis.net/bilder/CD057/550px/img0010.jpg>  
<https://www.dermis.net/bilder/CD055/550px/img0096.jpg>  
<https://www.dermis.net/bilder/CD016/550px/img0003.jpg>  
<https://www.dermis.net/bilder/CD006/550px/img0006.jpg>  
<https://www.dermis.net/bilder/CD033/550px/img0062.jpg>  
<https://www.dermis.net/bilder/CD071/550px/img0069.jpg>  
<https://www.dermis.net/bilder/CD016/550px/img0027.jpg>  
<https://www.dermis.net/bilder/CD036/550px/img0059.jpg>  
<https://www.dermis.net/bilder/CD051/550px/img0032.jpg>  
<https://www.dermis.net/bilder/CD005/550px/img0084.jpg>  
<https://www.dermis.net/bilder/CD015/550px/img0020.jpg>

<https://www.dermis.net/bilder/CD070/550px/img0034.jpg>  
<https://www.dermis.net/bilder/CD008/550px/img0040.jpg>  
<https://www.dermis.net/bilder/CD035/550px/img0011.jpg>  
<https://www.dermis.net/bilder/CD070/550px/img0100.jpg>  
<https://www.dermis.net/bilder/CD070/550px/img0099.jpg>  
<https://www.dermis.net/bilder/CD006/550px/img0074.jpg>  
<https://www.dermis.net/bilder/CD073/550px/img0003.jpg>  
<https://www.dermis.net/bilder/CD055/550px/img0092.jpg>  
<https://www.dermis.net/bilder/CD055/550px/img0093.jpg>  
<https://www.dermis.net/bilder/CD016/550px/img0035.jpg>  
<https://www.dermis.net/bilder/CD026/550px/img0021.jpg>  
<https://www.dermis.net/bilder/CD026/550px/img0022.jpg>  
<https://www.dermis.net/bilder/CD001/550px/img0049.jpg>  
<https://www.dermis.net/bilder/CD069/550px/img0099.jpg>  
<https://www.dermis.net/bilder/CD006/550px/img0008.jpg>  
<https://www.dermis.net/bilder/CD037/550px/img0039.jpg>  
<https://www.dermis.net/bilder/CD069/550px/img0108.jpg>  
<https://www.dermis.net/bilder/CD001/550px/img0092.jpg>  
<https://www.dermis.net/bilder/CD069/550px/img0030.jpg>  
<https://www.dermis.net/bilder/CD056/550px/img0055.jpg>  
<https://www.dermis.net/bilder/CD006/550px/img0080.jpg>  
<https://www.dermis.net/bilder/CD043/550px/img0010.jpg>  
<https://www.dermis.net/bilder/CD025/550px/img0057.jpg>  
<https://www.dermis.net/bilder/CD014/550px/img0005.jpg>  
<https://www.dermis.net/bilder/CD002/550px/img0069.jpg>  
<https://www.dermis.net/bilder/CD025/550px/img0058.jpg>  
<https://www.dermis.net/bilder/CD052/550px/img0101.jpg>  
<https://www.dermis.net/bilder/CD004/550px/img0038.jpg>  
<https://www.dermis.net/bilder/CD056/550px/img0001.jpg>  
<https://www.dermis.net/bilder/CD001/550px/img0088.jpg>  
<https://www.dermis.net/bilder/CD001/550px/img0103.jpg>  
<https://www.dermis.net/bilder/CD015/550px/img0025.jpg>  
<https://www.dermis.net/bilder/CD018/550px/img0111.jpg>  
<https://www.dermis.net/bilder/CD006/550px/img0082.jpg>  
<https://www.dermis.net/bilder/CD018/550px/img0109.jpg>  
<https://www.dermis.net/bilder/CD050/550px/img0065.jpg>  
<https://www.dermis.net/bilder/CD020/550px/img0044.jpg>  
<https://www.dermis.net/bilder/CD004/550px/img0095.jpg>  
<https://www.dermis.net/bilder/CD073/550px/img0007.jpg>  
<https://www.dermis.net/bilder/CD054/550px/img0003.jpg>  
<https://www.dermis.net/bilder/CD052/550px/img0009.jpg>  
<https://www.dermis.net/bilder/CD069/550px/img0042.jpg>  
<https://www.dermis.net/bilder/CD069/550px/img0043.jpg>  
<https://www.dermis.net/bilder/CD003/550px/img0084.jpg>  
<https://www.dermis.net/bilder/CD069/550px/img0046.jpg>  
<https://www.dermis.net/bilder/CD018/550px/img0108.jpg>  
<https://www.dermis.net/bilder/CD069/550px/img0047.jpg>  
<https://www.dermis.net/bilder/CD069/550px/img0048.jpg>

<https://www.dermis.net/bilder/CD018/550px/img0052.jpg>  
<https://www.dermis.net/bilder/CD051/550px/img0072.jpg>  
<https://www.dermis.net/bilder/CD015/550px/img0003.jpg>  
<https://www.dermis.net/bilder/CD042/550px/img0038.jpg>  
<https://www.dermis.net/bilder/CD020/550px/img0078.jpg>  
<https://www.dermis.net/bilder/CD025/550px/img0053.jpg>  
<https://www.dermis.net/bilder/CD025/550px/img0054.jpg>  
<https://www.dermis.net/bilder/CD025/550px/img0055.jpg>  
<https://www.dermis.net/bilder/CD025/550px/img0056.jpg>  
<https://www.dermis.net/bilder/CD003/550px/img0054.jpg>  
<https://www.dermis.net/bilder/CD005/550px/img0009.jpg>  
<https://www.dermis.net/bilder/CD044/550px/img0046.jpg>  
<https://www.dermis.net/bilder/CD046/550px/img0051.jpg>  
<https://www.dermis.net/bilder/CD048/550px/img0071.jpg>  
<https://www.dermis.net/bilder/CD054/550px/img0030.jpg>  
<https://www.dermis.net/bilder/CD044/550px/img0040.jpg>  
<https://www.dermis.net/bilder/CD048/550px/img0070.jpg>  
<https://www.dermis.net/bilder/CD034/550px/img0092.jpg>  
<https://www.dermis.net/bilder/CD008/550px/img0056.jpg>  
<https://www.dermis.net/bilder/CD016/550px/img0002.jpg>  
<https://www.dermis.net/bilder/CD043/550px/img0022.jpg>  
<https://www.dermis.net/bilder/CD036/550px/img0064.jpg>  
<https://www.dermis.net/bilder/CD006/550px/img0089.jpg>  
<https://www.dermis.net/bilder/CD016/550px/img0054.jpg>  
<https://www.dermis.net/bilder/CD001/550px/img0011.jpg>  
<https://www.dermis.net/bilder/CD007/550px/img0042.jpg>  
<https://www.dermis.net/bilder/CD052/550px/img0099.jpg>  
<https://www.dermis.net/bilder/CD018/550px/img0104.jpg>  
<https://www.dermis.net/bilder/CD004/550px/img0088.jpg>  
<https://www.dermis.net/bilder/CD004/550px/img0046.jpg>  
<https://www.dermis.net/bilder/CD003/550px/img0009.jpg>  
<https://www.dermis.net/bilder/CD041/550px/img0025.jpg>  
<https://www.dermis.net/bilder/CD001/550px/img0002.jpg>  
<https://www.dermis.net/bilder/CD021/550px/img0074.jpg>  
<https://www.dermis.net/bilder/CD004/550px/img0057.jpg>  
<https://www.dermis.net/bilder/CD005/550px/img0037.jpg>  
<https://www.dermis.net/bilder/CD028/550px/img0037.jpg>  
<https://www.dermis.net/bilder/CD035/550px/img0057.jpg>  
<https://www.dermis.net/bilder/CD015/550px/img0045.jpg>  
<https://www.dermis.net/bilder/CD050/550px/img0071.jpg>  
<https://www.dermis.net/bilder/CD071/550px/img0049.jpg>  
<https://www.dermis.net/bilder/CD018/550px/img0081.jpg>  
<https://www.dermis.net/bilder/CD005/550px/img0093.jpg>  
<https://www.dermis.net/bilder/CD042/550px/img0003.jpg>  
<https://www.dermis.net/bilder/CD005/550px/img0105.jpg>  
<https://www.dermis.net/bilder/CD007/550px/img0052.jpg>  
<https://www.dermis.net/bilder/CD020/550px/img0067.jpg>  
<https://www.dermis.net/bilder/CD046/550px/img0037.jpg>

<https://www.dermis.net/bilder/CD046/550px/img0038.jpg>  
<https://www.dermis.net/bilder/CD004/550px/img0083.jpg>  
<https://www.dermis.net/bilder/CD004/550px/img0058.jpg>  
<https://www.dermis.net/bilder/CD021/550px/img0094.jpg>  
<https://www.dermis.net/bilder/CD004/550px/img0090.jpg>  
<https://www.dermis.net/bilder/CD004/550px/img0092.jpg>  
<https://www.dermis.net/bilder/CD004/550px/img0089.jpg>  
<https://www.dermis.net/bilder/CD004/550px/img0041.jpg>  
<https://www.dermis.net/bilder/CD020/550px/img0090.jpg>  
<https://www.dermis.net/bilder/CD008/550px/img0068.jpg>  
<https://www.dermis.net/bilder/CD049/550px/img0051.jpg>  
<https://www.dermis.net/bilder/CD034/550px/img0004.jpg>  
<https://www.dermis.net/bilder/CD005/550px/img0018.jpg>  
<https://www.dermis.net/bilder/CD020/550px/img0010.jpg>  
<https://www.dermis.net/bilder/CD034/550px/img0003.jpg>  
<https://www.dermis.net/bilder/CD024/550px/img0085.jpg>  
<https://www.dermis.net/bilder/CD024/550px/img0086.jpg>  
<https://www.dermis.net/bilder/CD024/550px/img0092.jpg>  
<https://www.dermis.net/bilder/CD024/550px/img0093.jpg>  
<https://www.dermis.net/bilder/CD033/550px/img0057.jpg>  
<https://www.dermis.net/bilder/CD069/550px/img0101.jpg>  
<https://www.dermis.net/bilder/CD034/550px/img0073.jpg>  
<https://www.dermis.net/bilder/CD006/550px/img0027.jpg>  
<https://www.dermis.net/bilder/CD034/550px/img0072.jpg>  
<https://www.dermis.net/bilder/CD017/550px/img0079.jpg>  
<https://www.dermis.net/bilder/CD026/550px/img0038.jpg>  
<https://www.dermis.net/bilder/CD023/550px/img0098.jpg>  
<https://www.dermis.net/bilder/CD034/550px/img0099.jpg>  
<https://www.dermis.net/bilder/CD052/550px/img0031.jpg>  
<https://www.dermis.net/bilder/CD023/550px/img0096.jpg>  
<https://www.dermis.net/bilder/CD034/550px/img0039.jpg>  
<https://www.dermis.net/bilder/CD047/550px/img0027.jpg>  
<https://www.dermis.net/bilder/CD047/550px/img0028.jpg>  
<https://www.dermis.net/bilder/CD023/550px/img0100.jpg>  
<https://www.dermis.net/bilder/CD034/550px/img0087.jpg>  
<https://www.dermis.net/bilder/CD027/550px/img0075.jpg>  
<https://www.dermis.net/bilder/CD044/550px/img0008.jpg>  
<https://www.dermis.net/bilder/CD026/550px/img0046.jpg>  
<https://www.dermis.net/bilder/CD003/550px/img0060.jpg>  
<https://www.dermis.net/bilder/CD055/550px/img0004.jpg>  
<https://www.dermis.net/bilder/CD026/550px/img0049.jpg>  
<https://www.dermis.net/bilder/CD034/550px/img0088.jpg>  
<https://www.dermis.net/bilder/CD034/550px/img0089.jpg>  
<https://www.dermis.net/bilder/CD019/550px/img0010.jpg>  
<https://www.dermis.net/bilder/CD033/550px/img0060.jpg>  
<https://www.dermis.net/bilder/CD001/550px/img0036.jpg>  
<https://www.dermis.net/bilder/CD039/550px/img0084.jpg>  
<https://www.dermis.net/bilder/CD039/550px/img0085.jpg>



<https://www.dermis.net/bilder/CD039/550px/img0086.jpg>  
<https://www.dermis.net/bilder/CD039/550px/img0087.jpg>  
<https://www.dermis.net/bilder/CD039/550px/img0088.jpg>  
<https://www.dermis.net/bilder/CD033/550px/img0061.jpg>  
<https://www.dermis.net/bilder/CD001/550px/img0038.jpg>  
<https://www.dermis.net/bilder/CD001/550px/img0039.jpg>  
<https://www.dermis.net/bilder/CD039/550px/img0089.jpg>  
<https://www.dermis.net/bilder/CD039/550px/img0090.jpg>  
<https://www.dermis.net/bilder/CD005/550px/img0067.jpg>  
<https://www.dermis.net/bilder/CD004/550px/img0034.jpg>  
<https://www.dermis.net/bilder/CD033/550px/img0050.jpg>  
<https://www.dermis.net/bilder/CD044/550px/img0027.jpg>  
<https://www.dermis.net/bilder/CD044/550px/img0028.jpg>  
<https://www.dermis.net/bilder/CD041/550px/img0014.jpg>  
<https://www.dermis.net/bilder/CD006/550px/img0011.jpg>  
<https://www.dermis.net/bilder/CD057/550px/img0037.jpg>  
<https://www.dermis.net/bilder/CD057/550px/img0006.jpg>  
<https://www.dermis.net/bilder/CD019/550px/img0003.jpg>  
<https://www.dermis.net/bilder/CD034/550px/img0028.jpg>  
<https://www.dermis.net/bilder/CD004/550px/img0075.jpg>  
<https://www.dermis.net/bilder/CD023/550px/img0038.jpg>  
<https://www.dermis.net/bilder/CD048/550px/img0094.jpg>  
<https://www.dermis.net/bilder/CD048/550px/img0095.jpg>  
<https://www.dermis.net/bilder/CD023/550px/img0040.jpg>  
<https://www.dermis.net/bilder/CD018/550px/img0103.jpg>  
<https://www.dermis.net/bilder/CD026/550px/img0092.jpg>  
<https://www.dermis.net/bilder/CD026/550px/img0093.jpg>  
<https://www.dermis.net/bilder/CD054/550px/img0074.jpg>  
<https://www.dermis.net/bilder/CD016/550px/img0026.jpg>  
<https://www.dermis.net/bilder/CD044/550px/img0005.jpg>  
<https://www.dermis.net/bilder/CD014/550px/img0097.jpg>  
<https://www.dermis.net/bilder/CD016/550px/img0030.jpg>  
<https://www.dermis.net/bilder/CD035/550px/img0007.jpg>  
<https://www.dermis.net/bilder/CD046/550px/img0003.jpg>  
<https://www.dermis.net/bilder/CD035/550px/img0005.jpg>  
<https://www.dermis.net/bilder/CD035/550px/img0006.jpg>  
<https://www.dermis.net/bilder/CD037/550px/img0059.jpg>  
<https://www.dermis.net/bilder/CD037/550px/img0058.jpg>  
<https://www.dermis.net/bilder/CD046/550px/img0001.jpg>  
<https://www.dermis.net/bilder/CD046/550px/img0002.jpg>  
<https://www.dermis.net/bilder/CD046/550px/img0004.jpg>  
<https://www.dermis.net/bilder/CD003/550px/img0055.jpg>  
<https://www.dermis.net/bilder/CD035/550px/img0001.jpg>  
<https://www.dermis.net/bilder/CD003/550px/img0006.jpg>  
<https://www.dermis.net/bilder/CD044/550px/img0015.jpg>  
<https://www.dermis.net/bilder/CD050/550px/img0021.jpg>  
<https://www.dermis.net/bilder/CD021/550px/img0091.jpg>  
<https://www.dermis.net/bilder/CD037/550px/img0014.jpg>

<https://www.dermis.net/bilder/CD037/550px/img0015.jpg>  
<https://www.dermis.net/bilder/CD027/550px/img0090.jpg>  
<https://www.dermis.net/bilder/CD027/550px/img0091.jpg>  
<https://www.dermis.net/bilder/CD020/550px/img0085.jpg>  
<https://www.dermis.net/bilder/CD037/550px/img0013.jpg>  
<https://www.dermis.net/bilder/CD027/550px/img0089.jpg>  
<https://www.dermis.net/bilder/CD001/550px/img0010.jpg>  
<https://www.dermis.net/bilder/CD005/550px/img0069.jpg>  
<https://www.dermis.net/bilder/CD037/550px/img0046.jpg>  
<https://www.dermis.net/bilder/CD027/550px/img0056.jpg>  
<https://www.dermis.net/bilder/CD055/550px/img0001.jpg>  
<https://www.dermis.net/bilder/CD044/550px/img0049.jpg>  
<https://www.dermis.net/bilder/CD004/550px/img0047.jpg>  
<https://www.dermis.net/bilder/CD004/550px/img0087.jpg>  
<https://www.dermis.net/bilder/CD027/550px/img0055.jpg>  
<https://www.dermis.net/bilder/CD004/550px/img0037.jpg>  
<https://www.dermis.net/bilder/CD014/550px/img0084.jpg>  
<https://www.dermis.net/bilder/CD047/550px/img0033.jpg>  
<https://www.dermis.net/bilder/CD047/550px/img0038.jpg>  
<https://www.dermis.net/bilder/CD007/550px/img0035.jpg>  
<https://www.dermis.net/bilder/CD014/550px/img0001.jpg>  
<https://www.dermis.net/bilder/CD056/550px/img0022.jpg>  
<https://www.dermis.net/bilder/CD007/550px/img0004.jpg>  
<https://www.dermis.net/bilder/CD004/550px/img0035.jpg>  
<https://www.dermis.net/bilder/CD007/550px/img0023.jpg>  
<https://www.dermis.net/bilder/CD025/550px/img0038.jpg>  
<https://www.dermis.net/bilder/CD034/550px/img0008.jpg>  
<https://www.dermis.net/bilder/CD034/550px/img0010.jpg>  
<https://www.dermis.net/bilder/CD034/550px/img0011.jpg>  
<https://www.dermis.net/bilder/CD034/550px/img0012.jpg>  
<https://www.dermis.net/bilder/CD034/550px/img0013.jpg>  
<https://www.dermis.net/bilder/CD027/550px/img0070.jpg>  
<https://www.dermis.net/bilder/CD057/550px/img0038.jpg>  
<https://www.dermis.net/bilder/CD057/550px/img0039.jpg>  
<https://www.dermis.net/bilder/CD005/550px/img0062.jpg>  
<https://www.dermis.net/bilder/CD034/550px/img0007.jpg>  
<https://www.dermis.net/bilder/CD025/550px/img0039.jpg>  
<https://www.dermis.net/bilder/CD006/550px/img0047.jpg>  
<https://www.dermis.net/bilder/CD055/550px/img0028.jpg>  
<https://www.dermis.net/bilder/CD055/550px/img0034.jpg>  
<https://www.dermis.net/bilder/CD044/550px/img0025.jpg>  
<https://www.dermis.net/bilder/CD044/550px/img0026.jpg>  
<https://www.dermis.net/bilder/CD056/550px/img0018.jpg>  
<https://www.dermis.net/bilder/CD004/550px/img0033.jpg>  
<https://www.dermis.net/bilder/CD032/550px/img0022.jpg>  
<https://www.dermis.net/bilder/CD037/550px/img0042.jpg>  
<https://www.dermis.net/bilder/CD036/550px/img0021.jpg>  
<https://www.dermis.net/bilder/CD036/550px/img0022.jpg>

<https://www.dermis.net/bilder/CD032/550px/img0023.jpg>  
<https://www.dermis.net/bilder/CD006/550px/img0087.jpg>  
<https://www.dermis.net/bilder/CD006/550px/img0088.jpg>  
<https://www.dermis.net/bilder/CD015/550px/img0010.jpg>  
<https://www.dermis.net/bilder/CD005/550px/img0039.jpg>  
<https://www.dermis.net/bilder/CD040/550px/img0014.jpg>  
<https://www.dermis.net/bilder/CD002/550px/img0080.jpg>  
<https://www.dermis.net/bilder/CD037/550px/img0038.jpg>  
<https://www.dermis.net/bilder/CD003/550px/img0061.jpg>  
<https://www.dermis.net/bilder/CD004/550px/img0040.jpg>  
<https://www.dermis.net/bilder/CD040/550px/img0015.jpg>  
<https://www.dermis.net/bilder/CD055/550px/img0029.jpg>  
<https://www.dermis.net/bilder/CD040/550px/img0016.jpg>  
<https://www.dermis.net/bilder/CD005/550px/img0028.jpg>  
<https://www.dermis.net/bilder/CD005/550px/img0030.jpg>  
<https://www.dermis.net/bilder/CD050/550px/img0061.jpg>  
<https://www.dermis.net/bilder/CD004/550px/img0042.jpg>  
<https://www.dermis.net/bilder/CD020/550px/img0005.jpg>  
<https://www.dermis.net/bilder/CD044/550px/img0051.jpg>  
<https://www.dermis.net/bilder/CD052/550px/img0097.jpg>  
<https://www.dermis.net/bilder/CD054/550px/img0050.jpg>  
<https://www.dermis.net/bilder/CD025/550px/img0063.jpg>  
<https://www.dermis.net/bilder/CD044/550px/img0009.jpg>  
<https://www.dermis.net/bilder/CD025/550px/img0061.jpg>  
<https://www.dermis.net/bilder/CD033/550px/img0096.jpg>  
<https://www.dermis.net/bilder/CD033/550px/img0064.jpg>  
<https://www.dermis.net/bilder/CD054/550px/img0051.jpg>  
<https://www.dermis.net/bilder/CD035/550px/img0016.jpg>  
<https://www.dermis.net/bilder/CD036/550px/img0036.jpg>  
<https://www.dermis.net/bilder/CD026/550px/img0088.jpg>  
<https://www.dermis.net/bilder/CD039/550px/img0016.jpg>  
<https://www.dermis.net/bilder/CD007/550px/img0036.jpg>  
<https://www.dermis.net/bilder/CD066/550px/img0002.jpg>  
<https://www.dermis.net/bilder/CD006/550px/img0049.jpg>  
<https://www.dermis.net/bilder/CD048/550px/img0020.jpg>  
<https://www.dermis.net/bilder/CD001/550px/img0055.jpg>  
<https://www.dermis.net/bilder/CD004/550px/img0071.jpg>  
<https://www.dermis.net/bilder/CD049/550px/img0045.jpg>  
<https://www.dermis.net/bilder/CD001/550px/img0100.jpg>  
<https://www.dermis.net/bilder/CD001/550px/img0066.jpg>  
<https://www.dermis.net/bilder/CD001/550px/img0078.jpg>  
<https://www.dermis.net/bilder/CD049/550px/img0047.jpg>  
<https://www.dermis.net/bilder/CD049/550px/img0048.jpg>  
<https://www.dermis.net/bilder/CD048/550px/img0019.jpg>  
<https://www.dermis.net/bilder/CD048/550px/img0021.jpg>  
<https://www.dermis.net/bilder/CD048/550px/img0028.jpg>  
<https://www.dermis.net/bilder/CD004/550px/img0099.jpg>  
<https://www.dermis.net/bilder/CD046/550px/img0084.jpg>

<https://www.dermis.net/bilder/CD046/550px/img0083.jpg>  
<https://www.dermis.net/bilder/CD024/550px/img0037.jpg>  
<https://www.dermis.net/bilder/CD024/550px/img0038.jpg>  
<https://www.dermis.net/bilder/CD035/550px/img0051.jpg>  
<https://www.dermis.net/bilder/CD035/550px/img0052.jpg>  
<https://www.dermis.net/bilder/CD005/550px/img0012.jpg>  
<https://www.dermis.net/bilder/CD018/550px/img0025.jpg>  
<https://www.dermis.net/bilder/CD004/550px/img0085.jpg>  
<https://www.dermis.net/bilder/CD020/550px/img0027.jpg>  
<https://www.dermis.net/bilder/CD005/550px/img0035.jpg>  
<https://www.dermis.net/bilder/CD020/550px/img0026.jpg>  
<https://www.dermis.net/bilder/CD057/550px/img0005.jpg>  
<https://www.dermis.net/bilder/CD015/550px/img0011.jpg>  
<https://www.dermis.net/bilder/CD001/550px/img0028.jpg>  
<https://www.dermis.net/bilder/CD005/550px/img0036.jpg>  
<https://www.dermis.net/bilder/CD050/550px/img0026.jpg>  
<https://www.dermis.net/bilder/CD050/550px/img0025.jpg>  
<https://www.dermis.net/bilder/CD005/550px/img0107.jpg>  
<https://www.dermis.net/bilder/CD014/550px/img0031.jpg>  
<https://www.dermis.net/bilder/CD046/550px/img0065.jpg>  
<https://www.dermis.net/bilder/CD046/550px/img0066.jpg>  
<https://www.dermis.net/bilder/CD003/550px/img0011.jpg>  
<https://www.dermis.net/bilder/CD002/550px/img0066.jpg>  
<https://www.dermis.net/bilder/CD004/550px/img0039.jpg>  
<https://www.dermis.net/bilder/CD052/550px/img0026.jpg>  
<https://www.dermis.net/bilder/CD047/550px/img0092.jpg>  
<https://www.dermis.net/bilder/CD023/550px/img0084.jpg>  
<https://www.dermis.net/bilder/CD047/550px/img0069.jpg>  
<https://www.dermis.net/bilder/CD047/550px/img0070.jpg>  
<https://www.dermis.net/bilder/CD034/550px/img0045.jpg>  
<https://www.dermis.net/bilder/CD014/550px/img0078.jpg>  
<https://www.dermis.net/bilder/CD037/550px/img0005.jpg>  
<https://www.dermis.net/bilder/CD002/550px/img0089.jpg>  
<https://www.dermis.net/bilder/CD051/550px/img0066.jpg>  
<https://www.dermis.net/bilder/CD035/550px/img0031.jpg>  
<https://www.dermis.net/bilder/CD034/550px/img0044.jpg>  
<https://www.dermis.net/bilder/CD034/550px/img0046.jpg>  
<https://www.dermis.net/bilder/CD044/550px/img0004.jpg>  
<https://www.dermis.net/bilder/CD044/550px/img0002.jpg>  
<https://www.dermis.net/bilder/CD044/550px/img0003.jpg>  
<https://www.dermis.net/bilder/CD050/550px/img0053.jpg>  
<https://www.dermis.net/bilder/CD050/550px/img0054.jpg>  
<https://www.dermis.net/bilder/CD050/550px/img0056.jpg>  
<https://www.dermis.net/bilder/CD044/550px/img0006.jpg>  
<https://www.dermis.net/bilder/CD046/550px/img0094.jpg>  
<https://www.dermis.net/bilder/CD048/550px/img0023.jpg>  
<https://www.dermis.net/bilder/CD048/550px/img0024.jpg>  
<https://www.dermis.net/bilder/CD015/550px/img0017.jpg>

<https://www.dermis.net/bilder/CD037/550px/img0017.jpg>  
<https://www.dermis.net/bilder/CD024/550px/img0044.jpg>  
<https://www.dermis.net/bilder/CD024/550px/img0046.jpg>  
<https://www.dermis.net/bilder/CD027/550px/img0006.jpg>  
<https://www.dermis.net/bilder/CD044/550px/img0075.jpg>  
<https://www.dermis.net/bilder/CD044/550px/img0073.jpg>  
<https://www.dermis.net/bilder/CD058/550px/img0078.jpg>  
<https://www.dermis.net/bilder/CD058/550px/img0079.jpg>  
<https://www.dermis.net/bilder/CD052/550px/img0004.jpg>  
<https://www.dermis.net/bilder/CD037/550px/img0019.jpg>  
<https://www.dermis.net/bilder/CD020/550px/img0099.jpg>  
<https://www.dermis.net/bilder/CD027/550px/img0050.jpg>  
<https://www.dermis.net/bilder/CD027/550px/img0053.jpg>  
<https://www.dermis.net/bilder/CD027/550px/img0048.jpg>  
<https://www.dermis.net/bilder/CD020/550px/img0098.jpg>  
<https://www.dermis.net/bilder/CD027/550px/img0049.jpg>  
<https://www.dermis.net/bilder/CD054/550px/img0001.jpg>  
<https://www.dermis.net/bilder/CD020/550px/img0097.jpg>  
<https://www.dermis.net/bilder/CD032/550px/img0031.jpg>  
<https://www.dermis.net/bilder/CD006/550px/img0084.jpg>  
<https://www.dermis.net/bilder/CD014/550px/img0019.jpg>  
<https://www.dermis.net/bilder/CD054/550px/img0088.jpg>  
<https://www.dermis.net/bilder/CD004/550px/img0059.jpg>  
<https://www.dermis.net/bilder/CD026/550px/img0094.jpg>  
<https://www.dermis.net/bilder/CD006/550px/img0066.jpg>  
<https://www.dermis.net/bilder/CD003/550px/img0052.jpg>  
<https://www.dermis.net/bilder/CD003/550px/img0053.jpg>  
<https://www.dermis.net/bilder/CD040/550px/img0098.jpg>  
<https://www.dermis.net/bilder/CD005/550px/img0029.jpg>  
<https://www.dermis.net/bilder/CD023/550px/img0061.jpg>  
<https://www.dermis.net/bilder/CD044/550px/img0007.jpg>  
<https://www.dermis.net/bilder/CD020/550px/img0008.jpg>  
<https://www.dermis.net/bilder/CD020/550px/img0009.jpg>  
<https://www.dermis.net/bilder/CD004/550px/img0036.jpg>  
<https://www.dermis.net/bilder/CD041/550px/img0027.jpg>  
<https://www.dermis.net/bilder/CD014/550px/img0014.jpg>  
<https://www.dermis.net/bilder/CD016/550px/img0051.jpg>  
<https://www.dermis.net/bilder/CD033/550px/img0087.jpg>  
<https://www.dermis.net/bilder/CD058/550px/img0090.jpg>  
<https://www.dermis.net/bilder/CD003/550px/img0093.jpg>  
<https://www.dermis.net/bilder/CD039/550px/img0050.jpg>  
<https://www.dermis.net/bilder/CD046/550px/img0009.jpg>  
<https://www.dermis.net/bilder/CD046/550px/img0010.jpg>  
<https://www.dermis.net/bilder/CD039/550px/img0041.jpg>  
<https://www.dermis.net/bilder/CD039/550px/img0042.jpg>  
<https://www.dermis.net/bilder/CD046/550px/img0015.jpg>  
<https://www.dermis.net/bilder/CD046/550px/img0016.jpg>  
<https://www.dermis.net/bilder/CD037/550px/img0060.jpg>

<https://www.dermis.net/bilder/CD046/550px/img0093.jpg>  
<https://www.dermis.net/bilder/CD026/550px/img0044.jpg>  
<https://www.dermis.net/bilder/CD032/550px/img0071.jpg>  
<https://www.dermis.net/bilder/CD051/550px/img0017.jpg>  
<https://www.dermis.net/bilder/CD044/550px/img0063.jpg>  
<https://www.dermis.net/bilder/CD001/550px/img0062.jpg>  
<https://www.dermis.net/bilder/CD005/550px/img0027.jpg>  
<https://www.dermis.net/bilder/CD002/550px/img0052.jpg>  
<https://www.dermis.net/bilder/CD003/550px/img0096.jpg>  
<https://www.dermis.net/bilder/CD003/550px/img0019.jpg>  
<https://www.dermis.net/bilder/CD034/550px/img0031.jpg>  
<https://www.dermis.net/bilder/CD034/550px/img0032.jpg>  
<https://www.dermis.net/bilder/CD005/550px/img0092.jpg>  
<https://www.dermis.net/bilder/CD048/550px/img0088.jpg>  
<https://www.dermis.net/bilder/CD048/550px/img0089.jpg>  
<https://www.dermis.net/bilder/CD006/550px/img0078.jpg>  
<https://www.dermis.net/bilder/CD055/550px/img0036.jpg>  
<https://www.dermis.net/bilder/CD087/550px/img0009.jpg>  
<https://www.dermis.net/bilder/CD042/550px/img0089.jpg>  
<https://www.dermis.net/bilder/CD212/550px/img0033.jpg>  
<https://www.dermis.net/bilder/CD212/550px/img0034.jpg>  
<https://www.dermis.net/bilder/CD212/550px/img0116.jpg>  
<https://www.dermis.net/bilder/CD212/550px/img0117.jpg>  
<https://www.dermis.net/bilder/CD212/550px/img0030.jpg>  
<https://www.dermis.net/bilder/CD212/550px/img0031.jpg>  
<https://www.dermis.net/bilder/CD212/550px/img0032.jpg>  
<https://www.dermis.net/bilder/CD002/550px/img0072.jpg>  
<https://www.dermis.net/bilder/CD194/550px/img0077.jpg>  
<https://www.dermis.net/bilder/CD013/550px/img0020.jpg>  
<https://www.dermis.net/bilder/CD179/550px/img0005.jpg>  
<https://www.dermis.net/bilder/CD195/550px/img0069.jpg>  
<https://www.dermis.net/bilder/CD195/550px/img0070.jpg>  
<https://www.dermis.net/bilder/CD199/550px/img0044.jpg>  
<https://www.dermis.net/bilder/CD007/550px/img0109.jpg>  
<https://www.dermis.net/bilder/CD014/550px/img0089.jpg>  
<https://www.dermis.net/bilder/CD056/550px/img0064.jpg>  
<https://www.dermis.net/bilder/CD187/550px/img0028.jpg>  
<https://www.dermis.net/bilder/CD210/550px/img0015.jpg>  
<https://www.dermis.net/bilder/CD210/550px/img0016.jpg>  
<https://www.dermis.net/bilder/CD198/550px/img0161.jpg>  
<https://www.dermis.net/bilder/CD198/550px/img0162.jpg>  
<https://www.dermis.net/bilder/CD054/550px/img0027.jpg>  
<https://www.dermis.net/bilder/CD056/550px/img0079.jpg>  
<https://www.dermis.net/bilder/CD056/550px/img0080.jpg>  
<https://www.dermis.net/bilder/CD056/550px/img0081.jpg>  
<https://www.dermis.net/bilder/CD040/550px/img0042.jpg>  
<https://www.dermis.net/bilder/CD014/550px/img0018.jpg>  
<https://www.dermis.net/bilder/CD040/550px/img0032.jpg>

<https://www.dermis.net/bilder/CD182/550px/img0062.jpg>  
<https://www.dermis.net/bilder/CD185/550px/img0047.jpg>  
<https://www.dermis.net/bilder/CD185/550px/img0048.jpg>  
<https://www.dermis.net/bilder/CD178/550px/img0009.jpg>  
<https://www.dermis.net/bilder/CD199/550px/img0004.jpg>  
<https://www.dermis.net/bilder/CD070/550px/img0087.jpg>  
<https://www.dermis.net/bilder/CD070/550px/img0088.jpg>  
<https://www.dermis.net/bilder/CD001/550px/img0091.jpg>  
<https://www.dermis.net/bilder/CD192/550px/img0076.jpg>  
<https://www.dermis.net/bilder/CD021/550px/img0014.jpg>  
<https://www.dermis.net/bilder/CD193/550px/img0035.jpg>  
<https://www.dermis.net/bilder/CD193/550px/img0036.jpg>  
<https://www.dermis.net/bilder/CD008/550px/img0003.jpg>  
<https://www.dermis.net/bilder/CD182/550px/img0075.jpg>  
<https://www.dermis.net/bilder/CD196/550px/img0173.jpg>  
<https://www.dermis.net/bilder/CD018/550px/img0054.jpg>  
<https://www.dermis.net/bilder/CD013/550px/img0016.jpg>  
<https://www.dermis.net/bilder/CD003/550px/img0059.jpg>  
<https://www.dermis.net/bilder/CD196/550px/img0142.jpg>  
<https://www.dermis.net/bilder/CD001/550px/img0073.jpg>  
<https://www.dermis.net/bilder/CD189/550px/img0069.jpg>  
<https://www.dermis.net/bilder/CD189/550px/img0070.jpg>  
<https://www.dermis.net/bilder/CD001/550px/img0069.jpg>  
<https://www.dermis.net/bilder/CD041/550px/img0065.jpg>  
<https://www.dermis.net/bilder/CD201/550px/img0006.jpg>  
<https://www.dermis.net/bilder/CD195/550px/img0071.jpg>  
<https://www.dermis.net/bilder/CD211/550px/img0089.jpg>  
<https://www.dermis.net/bilder/CD033/550px/img0008.jpg>  
<https://www.dermis.net/bilder/CD033/550px/img0024.jpg>  
<https://www.dermis.net/bilder/CD036/550px/img0060.jpg>  
<https://www.dermis.net/bilder/CD182/550px/img0001.jpg>  
<https://www.dermis.net/bilder/CD032/550px/img0040.jpg>  
<https://www.dermis.net/bilder/CD180/550px/img0065.jpg>  
<https://www.dermis.net/bilder/CD180/550px/img0064.jpg>  
<https://www.dermis.net/bilder/CD178/550px/img0093.jpg>  
<https://www.dermis.net/bilder/CD001/550px/img0027.jpg>  
<https://www.dermis.net/bilder/CD184/550px/img0021.jpg>  
<https://www.dermis.net/bilder/CD184/550px/img0022.jpg>  
<https://www.dermis.net/bilder/CD033/550px/img0001.jpg>  
<https://www.dermis.net/bilder/CD178/550px/img0072.jpg>  
<https://www.dermis.net/bilder/CD184/550px/img0058.jpg>  
<https://www.dermis.net/bilder/CD194/550px/img0143.jpg>  
<https://www.dermis.net/bilder/CD021/550px/img0005.jpg>  
<https://www.dermis.net/bilder/CD033/550px/img0065.jpg>  
<https://www.dermis.net/bilder/CD187/550px/img0008.jpg>  
<https://www.dermis.net/bilder/CD196/550px/img0086.jpg>  
<https://www.dermis.net/bilder/CD210/550px/img0094.jpg>  
<https://www.dermis.net/bilder/CD011/550px/img0081.jpg>

<https://www.dermis.net/bilder/CD033/550px/img0007.jpg>  
<https://www.dermis.net/bilder/CD017/550px/img0003.jpg>  
<https://www.dermis.net/bilder/CD211/550px/img0088.jpg>  
<https://www.dermis.net/bilder/CD178/550px/img0073.jpg>  
<https://www.dermis.net/bilder/CD198/550px/img0187.jpg>  
<https://www.dermis.net/bilder/CD198/550px/img0188.jpg>  
<https://www.dermis.net/bilder/CD198/550px/img0120.jpg>  
<https://www.dermis.net/bilder/CD187/550px/img0029.jpg>  
<https://www.dermis.net/bilder/CD187/550px/img0030.jpg>  
<https://www.dermis.net/bilder/CD180/550px/img0063.jpg>  
<https://www.dermis.net/bilder/CD187/550px/img0032.jpg>  
<https://www.dermis.net/bilder/CD008/550px/img0014.jpg>  
<https://www.dermis.net/bilder/CD041/550px/img0023.jpg>  
<https://www.dermis.net/bilder/CD041/550px/img0024.jpg>  
<https://www.dermis.net/bilder/CD004/550px/img0091.jpg>  
<https://www.dermis.net/bilder/CD210/550px/img0109.jpg>  
<https://www.dermis.net/bilder/CD042/550px/img0083.jpg>  
<https://www.dermis.net/bilder/CD042/550px/img0084.jpg>  
<https://www.dermis.net/bilder/CD008/550px/img0075.jpg>  
<https://www.dermis.net/bilder/CD008/550px/img0028.jpg>  
<https://www.dermis.net/bilder/CD037/550px/img0047.jpg>  
<https://www.dermis.net/bilder/CD001/550px/img0013.jpg>  
<https://www.dermis.net/bilder/CD032/550px/img0050.jpg>  
<https://www.dermis.net/bilder/CD181/550px/img0063.jpg>  
<https://www.dermis.net/bilder/CD027/550px/img0023.jpg>  
<https://www.dermis.net/bilder/CD198/550px/img0047.jpg>  
<https://www.dermis.net/bilder/CD199/550px/img0020.jpg>  
<https://www.dermis.net/bilder/CD212/550px/img0125.jpg>  
<https://www.dermis.net/bilder/CD185/550px/img0066.jpg>  
<https://www.dermis.net/bilder/CD196/550px/img0042.jpg>  
<https://www.dermis.net/bilder/CD181/550px/img0020.jpg>  
<https://www.dermis.net/bilder/CD181/550px/img0019.jpg>  
<https://www.dermis.net/bilder/CD181/550px/img0016.jpg>  
<https://www.dermis.net/bilder/CD180/550px/img0070.jpg>  
<https://www.dermis.net/bilder/CD041/550px/img0060.jpg>  
<https://www.dermis.net/bilder/CD199/550px/img0136.jpg>  
<https://www.dermis.net/bilder/CD193/550px/img0046.jpg>  
<https://www.dermis.net/bilder/CD210/550px/img0113.jpg>  
<https://www.dermis.net/bilder/CD057/550px/img0067.jpg>  
<https://www.dermis.net/bilder/CD057/550px/img0068.jpg>  
<https://www.dermis.net/bilder/CD195/550px/img0044.jpg>  
<https://www.dermis.net/bilder/CD212/550px/img0126.jpg>  
<https://www.dermis.net/bilder/CD212/550px/img0127.jpg>  
<https://www.dermis.net/bilder/CD212/550px/img0128.jpg>  
<https://www.dermis.net/bilder/CD007/550px/img0117.jpg>  
<https://www.dermis.net/bilder/CD008/550px/img0004.jpg>  
<https://www.dermis.net/bilder/CD195/550px/img0056.jpg>  
<https://www.dermis.net/bilder/CD195/550px/img0058.jpg>



<https://www.dermis.net/bilder/CD195/550px/img0059.jpg>  
<https://www.dermis.net/bilder/CD195/550px/img0060.jpg>  
<https://www.dermis.net/bilder/CD015/550px/img0002.jpg>  
<https://www.dermis.net/bilder/CD198/550px/img0166.jpg>  
<https://www.dermis.net/bilder/CD056/550px/img0044.jpg>  
<https://www.dermis.net/bilder/CD211/550px/img0001.jpg>  
<https://www.dermis.net/bilder/CD191/550px/img0038.jpg>  
<https://www.dermis.net/bilder/CD191/550px/img0039.jpg>  
<https://www.dermis.net/bilder/CD192/550px/img0043.jpg>  
<https://www.dermis.net/bilder/CD042/550px/img0044.jpg>  
<https://www.dermis.net/bilder/CD042/550px/img0045.jpg>  
<https://www.dermis.net/bilder/CD180/550px/img0012.jpg>  
<https://www.dermis.net/bilder/CD180/550px/img0013.jpg>  
<https://www.dermis.net/bilder/CD180/550px/img0011.jpg>  
<https://www.dermis.net/bilder/CD180/550px/img0010.jpg>  
<https://www.dermis.net/bilder/CD033/550px/img0021.jpg>  
<https://www.dermis.net/bilder/CD210/550px/img0103.jpg>  
<https://www.dermis.net/bilder/CD181/550px/img0044.jpg>  
<https://www.dermis.net/bilder/CD014/550px/img0070.jpg>  
<https://www.dermis.net/bilder/CD180/550px/img0024.jpg>  
<https://www.dermis.net/bilder/CD180/550px/img0025.jpg>  
<https://www.dermis.net/bilder/CD041/550px/img0008.jpg>  
<https://www.dermis.net/bilder/CD184/550px/img0074.jpg>  
<https://www.dermis.net/bilder/CD181/550px/img0077.jpg>  
<https://www.dermis.net/bilder/CD181/550px/img0075.jpg>  
<https://www.dermis.net/bilder/CD198/550px/img0012.jpg>  
<https://www.dermis.net/bilder/CD198/550px/img0013.jpg>  
<https://www.dermis.net/bilder/CD198/550px/img0015.jpg>  
<https://www.dermis.net/bilder/CD007/550px/img0091.jpg>  
<https://www.dermis.net/bilder/CD007/550px/img0093.jpg>  
<https://www.dermis.net/bilder/CD007/550px/img0097.jpg>  
<https://www.dermis.net/bilder/CD007/550px/img0099.jpg>  
<https://www.dermis.net/bilder/CD007/550px/img0094.jpg>  
<https://www.dermis.net/bilder/CD007/550px/img0101.jpg>  
<https://www.dermis.net/bilder/CD184/550px/img0059.jpg>  
<https://www.dermis.net/bilder/CD184/550px/img0060.jpg>  
<https://www.dermis.net/bilder/CD197/550px/img0018.jpg>  
<https://www.dermis.net/bilder/CD197/550px/img0019.jpg>  
<https://www.dermis.net/bilder/CD197/550px/img0020.jpg>  
<https://www.dermis.net/bilder/CD197/550px/img0021.jpg>  
<https://www.dermis.net/bilder/CD202/550px/img0030.jpg>  
<https://www.dermis.net/bilder/CD012/550px/img0079.jpg>  
<https://www.dermis.net/bilder/CD181/550px/img0054.jpg>  
<https://www.dermis.net/bilder/CD011/550px/img0098.jpg>  
<https://www.dermis.net/bilder/CD191/550px/img0029.jpg>  
<https://www.dermis.net/bilder/CD191/550px/img0030.jpg>  
<https://www.dermis.net/bilder/CD041/550px/img0092.jpg>  
<https://www.dermis.net/bilder/CD043/550px/img0030.jpg>

<https://www.dermis.net/bilder/CD197/550px/img0002.jpg>  
<https://www.dermis.net/bilder/CD196/550px/img0123.jpg>  
<https://www.dermis.net/bilder/CD041/550px/img0062.jpg>  
<https://www.dermis.net/bilder/CD056/550px/img0043.jpg>  
<https://www.dermis.net/bilder/CD004/550px/img0100.jpg>  
<https://www.dermis.net/bilder/CD042/550px/img0070.jpg>  
<https://www.dermis.net/bilder/CD001/550px/img0065.jpg>  
<https://www.dermis.net/bilder/CD001/550px/img0057.jpg>  
<https://www.dermis.net/bilder/CD027/550px/img0019.jpg>  
<https://www.dermis.net/bilder/CD085/550px/img0075.jpg>  
<https://www.dermis.net/bilder/CD033/550px/img0063.jpg>  
<https://www.dermis.net/bilder/CD021/550px/img0077.jpg>  
<https://www.dermis.net/bilder/CD193/550px/img0186.jpg>  
<https://www.dermis.net/bilder/CD193/550px/img0187.jpg>  
<https://www.dermis.net/bilder/CD193/550px/img0189.jpg>  
<https://www.dermis.net/bilder/CD193/550px/img0190.jpg>  
<https://www.dermis.net/bilder/CD199/550px/img0125.jpg>  
<https://www.dermis.net/bilder/CD211/550px/img0038.jpg>  
<https://www.dermis.net/bilder/CD040/550px/img0085.jpg>  
<https://www.dermis.net/bilder/CD040/550px/img0086.jpg>  
<https://www.dermis.net/bilder/CD033/550px/img0052.jpg>  
<https://www.dermis.net/bilder/CD002/550px/img0087.jpg>  
<https://www.dermis.net/bilder/CD002/550px/img0088.jpg>  
<https://www.dermis.net/bilder/CD002/550px/img0091.jpg>  
<https://www.dermis.net/bilder/CD003/550px/img0003.jpg>  
<https://www.dermis.net/bilder/CD013/550px/img0039.jpg>  
<https://www.dermis.net/bilder/CD184/550px/img0105.jpg>  
<https://www.dermis.net/bilder/CD184/550px/img0106.jpg>  
<https://www.dermis.net/bilder/CD184/550px/img0107.jpg>  
<https://www.dermis.net/bilder/CD184/550px/img0108.jpg>  
<https://www.dermis.net/bilder/CD193/550px/img0198.jpg>  
<https://www.dermis.net/bilder/CD193/550px/img0199.jpg>  
<https://www.dermis.net/bilder/CD198/550px/img0093.jpg>  
<https://www.dermis.net/bilder/CD198/550px/img0094.jpg>  
<https://www.dermis.net/bilder/CD212/550px/img0134.jpg>  
<https://www.dermis.net/bilder/CD212/550px/img0135.jpg>  
<https://www.dermis.net/bilder/CD055/550px/img0023.jpg>  
<https://www.dermis.net/bilder/CD041/550px/img0034.jpg>  
<https://www.dermis.net/bilder/CD180/550px/img0079.jpg>  
<https://www.dermis.net/bilder/CD180/550px/img0080.jpg>  
<https://www.dermis.net/bilder/CD006/550px/img0086.jpg>  
<https://www.dermis.net/bilder/CD001/550px/img0101.jpg>  
<https://www.dermis.net/bilder/CD195/550px/img0117.jpg>  
<https://www.dermis.net/bilder/CD195/550px/img0118.jpg>  
<https://www.dermis.net/bilder/CD033/550px/img0066.jpg>  
<https://www.dermis.net/bilder/CD202/550px/img0033.jpg>  
<https://www.dermis.net/bilder/CD007/550px/img0025.jpg>  
<https://www.dermis.net/bilder/CD025/550px/img0069.jpg>

<https://www.dermis.net/bilder/CD025/550px/img0071.jpg>  
<https://www.dermis.net/bilder/CD180/550px/img0062.jpg>  
<https://www.dermis.net/bilder/CD036/550px/img0080.jpg>  
<https://www.dermis.net/bilder/CD189/550px/img0037.jpg>  
<https://www.dermis.net/bilder/CD198/550px/img0011.jpg>  
<https://www.dermis.net/bilder/CD007/550px/img0096.jpg>  
<https://www.dermis.net/bilder/CD042/550px/img0093.jpg>  
<https://www.dermis.net/bilder/CD021/550px/img0018.jpg>  
<https://www.dermis.net/bilder/CD042/550px/img0032.jpg>  
<https://www.dermis.net/bilder/CD056/550px/img0066.jpg>  
<https://www.dermis.net/bilder/CD056/550px/img0068.jpg>  
<https://www.dermis.net/bilder/CD189/550px/img0010.jpg>  
<https://www.dermis.net/bilder/CD193/550px/img0141.jpg>  
<https://www.dermis.net/bilder/CD197/550px/img0078.jpg>  
<https://www.dermis.net/bilder/CD197/550px/img0079.jpg>  
<https://www.dermis.net/bilder/CD197/550px/img0001.jpg>  
<https://www.dermis.net/bilder/CD193/550px/img0073.jpg>  
<https://www.dermis.net/bilder/CD013/550px/img0005.jpg>  
<https://www.dermis.net/bilder/CD042/550px/img0082.jpg>  
<https://www.dermis.net/bilder/CD042/550px/img0053.jpg>  
<https://www.dermis.net/bilder/CD021/550px/img0006.jpg>  
<https://www.dermis.net/bilder/CD197/550px/img0003.jpg>  
<https://www.dermis.net/bilder/CD193/550px/img0131.jpg>  
<https://www.dermis.net/bilder/CD193/550px/img0132.jpg>  
<https://www.dermis.net/bilder/CD196/550px/img0143.jpg>  
<https://www.dermis.net/bilder/CD195/550px/img0047.jpg>  
<https://www.dermis.net/bilder/CD178/550px/img0076.jpg>  
<https://www.dermis.net/bilder/CD178/550px/img0077.jpg>  
<https://www.dermis.net/bilder/CD178/550px/img0011.jpg>  
<https://www.dermis.net/bilder/CD178/550px/img0012.jpg>  
<https://www.dermis.net/bilder/CD198/550px/img0074.jpg>  
<https://www.dermis.net/bilder/CD185/550px/img0026.jpg>  
<https://www.dermis.net/bilder/CD196/550px/img0071.jpg>  
<https://www.dermis.net/bilder/CD196/550px/img0070.jpg>  
<https://www.dermis.net/bilder/CD008/550px/img0050.jpg>  
<https://www.dermis.net/bilder/CD184/550px/img0035.jpg>  
<https://www.dermis.net/bilder/CD178/550px/img0058.jpg>  
<https://www.dermis.net/bilder/CD185/550px/img0059.jpg>  
<https://www.dermis.net/bilder/CD196/550px/img0041.jpg>  
<https://www.dermis.net/bilder/CD212/550px/img0123.jpg>  
<https://www.dermis.net/bilder/CD212/550px/img0124.jpg>  
<https://www.dermis.net/bilder/CD187/550px/img0026.jpg>  
<https://www.dermis.net/bilder/CD187/550px/img0027.jpg>  
<https://www.dermis.net/bilder/CD196/550px/img0109.jpg>  
<https://www.dermis.net/bilder/CD036/550px/img0071.jpg>  
<https://www.dermis.net/bilder/CD033/550px/img0041.jpg>  
<https://www.dermis.net/bilder/CD021/550px/img0059.jpg>  
<https://www.dermis.net/bilder/CD195/550px/img0092.jpg>

<https://www.dermis.net/bilder/CD040/550px/img0044.jpg>  
<https://www.dermis.net/bilder/CD180/550px/img0067.jpg>  
<https://www.dermis.net/bilder/CD180/550px/img0069.jpg>  
<https://www.dermis.net/bilder/CD021/550px/img0095.jpg>  
<https://www.dermis.net/bilder/CD193/550px/img0079.jpg>  
<https://www.dermis.net/bilder/CD198/550px/img0019.jpg>  
<https://www.dermis.net/bilder/CD198/550px/img0020.jpg>  
<https://www.dermis.net/bilder/CD198/550px/img0021.jpg>  
<https://www.dermis.net/bilder/CD001/550px/img0094.jpg>  
<https://www.dermis.net/bilder/CD001/550px/img0033.jpg>  
<https://www.dermis.net/bilder/CD041/550px/img0036.jpg>  
<https://www.dermis.net/bilder/CD002/550px/img0092.jpg>  
<https://www.dermis.net/bilder/CD021/550px/img0045.jpg>  
<https://www.dermis.net/bilder/CD193/550px/img0194.jpg>  
<https://www.dermis.net/bilder/CD041/550px/img0001.jpg>  
<https://www.dermis.net/bilder/CD041/550px/img0002.jpg>  
<https://www.dermis.net/bilder/CD041/550px/img0003.jpg>  
<https://www.dermis.net/bilder/CD194/550px/img0101.jpg>  
<https://www.dermis.net/bilder/CD196/550px/img0083.jpg>  
<https://www.dermis.net/bilder/CD196/550px/img0084.jpg>  
<https://www.dermis.net/bilder/CD180/550px/img0093.jpg>  
<https://www.dermis.net/bilder/CD197/550px/img0011.jpg>  
<https://www.dermis.net/bilder/CD183/550px/img0074.jpg>  
<https://www.dermis.net/bilder/CD211/550px/img0032.jpg>  
<https://www.dermis.net/bilder/CD211/550px/img0033.jpg>  
<https://www.dermis.net/bilder/CD197/550px/img0075.jpg>  
<https://www.dermis.net/bilder/CD011/550px/img0080.jpg>  
<https://www.dermis.net/bilder/CD196/550px/img0174.jpg>  
<https://www.dermis.net/bilder/CD197/550px/img0004.jpg>  
<https://www.dermis.net/bilder/CD196/550px/img0127.jpg>  
<https://www.dermis.net/bilder/CD008/550px/img0054.jpg>  
<https://www.dermis.net/bilder/CD041/550px/img0059.jpg>  
<https://www.dermis.net/bilder/CD002/550px/img0071.jpg>  
<https://www.dermis.net/bilder/CD180/550px/img0066.jpg>  
<https://www.dermis.net/bilder/CD033/550px/img0059.jpg>  
<https://www.dermis.net/bilder/CD055/550px/img0043.jpg>  
<https://www.dermis.net/bilder/CD191/550px/img0088.jpg>  
<https://www.dermis.net/bilder/CD040/550px/img0045.jpg>  
<https://www.dermis.net/bilder/CD040/550px/img0046.jpg>  
<https://www.dermis.net/bilder/CD040/550px/img0047.jpg>  
<https://www.dermis.net/bilder/CD033/550px/img0053.jpg>  
<https://www.dermis.net/bilder/CD050/550px/img0027.jpg>  
<https://www.dermis.net/bilder/CD050/550px/img0028.jpg>  
<https://www.dermis.net/bilder/CD033/550px/img0054.jpg>  
<https://www.dermis.net/bilder/CD185/550px/img0022.jpg>  
<https://www.dermis.net/bilder/CD185/550px/img0023.jpg>  
<https://www.dermis.net/bilder/CD210/550px/img0107.jpg>  
<https://www.dermis.net/bilder/CD210/550px/img0110.jpg>

<https://www.dermis.net/bilder/CD210/550px/img0111.jpg>  
<https://www.dermis.net/bilder/CD043/550px/img0001.jpg>  
<https://www.dermis.net/bilder/CD001/550px/img0016.jpg>  
<https://www.dermis.net/bilder/CD001/550px/img0089.jpg>  
<https://www.dermis.net/bilder/CD045/550px/img0049.jpg>  
<https://www.dermis.net/bilder/CD056/550px/img0042.jpg>  
<https://www.dermis.net/bilder/CD192/550px/img0044.jpg>  
<https://www.dermis.net/bilder/CD192/550px/img0045.jpg>  
<https://www.dermis.net/bilder/CD192/550px/img0046.jpg>  
<https://www.dermis.net/bilder/CD192/550px/img0047.jpg>  
<https://www.dermis.net/bilder/CD018/550px/img0115.jpg>  
<https://www.dermis.net/bilder/CD193/550px/img0108.jpg>  
<https://www.dermis.net/bilder/CD027/550px/img0025.jpg>  
<https://www.dermis.net/bilder/CD027/550px/img0026.jpg>  
<https://www.dermis.net/bilder/CD021/550px/img0066.jpg>  
<https://www.dermis.net/bilder/CD210/550px/img0101.jpg>  
<https://www.dermis.net/bilder/CD181/550px/img0045.jpg>  
<https://www.dermis.net/bilder/CD193/550px/img0048.jpg>  
<https://www.dermis.net/bilder/CD193/550px/img0049.jpg>  
<https://www.dermis.net/bilder/CD193/550px/img0087.jpg>  
<https://www.dermis.net/bilder/CD181/550px/img0078.jpg>  
<https://www.dermis.net/bilder/CD181/550px/img0076.jpg>  
<https://www.dermis.net/bilder/CD184/550px/img0018.jpg>  
<https://www.dermis.net/bilder/CD184/550px/img0019.jpg>  
<https://www.dermis.net/bilder/CD184/550px/img0020.jpg>  
<https://www.dermis.net/bilder/CD013/550px/img0003.jpg>  
<https://www.dermis.net/bilder/CD178/550px/img0071.jpg>  
<https://www.dermis.net/bilder/CD021/550px/img0001.jpg>  
<https://www.dermis.net/bilder/CD189/550px/img0063.jpg>  
<https://www.dermis.net/bilder/CD189/550px/img0064.jpg>  
<https://www.dermis.net/bilder/CD042/550px/img0094.jpg>  
<https://www.dermis.net/bilder/CD181/550px/img0051.jpg>  
<https://www.dermis.net/bilder/CD181/550px/img0053.jpg>  
<https://www.dermis.net/bilder/CD181/550px/img0050.jpg>  
<https://www.dermis.net/bilder/CD190/550px/img0031.jpg>  
<https://www.dermis.net/bilder/CD190/550px/img0032.jpg>  
<https://www.dermis.net/bilder/CD191/550px/img0006.jpg>  
<https://www.dermis.net/bilder/CD191/550px/img0008.jpg>  
<https://www.dermis.net/bilder/CD185/550px/img0039.jpg>  
<https://www.dermis.net/bilder/CD185/550px/img0040.jpg>  
<https://www.dermis.net/bilder/CD042/550px/img0014.jpg>  
<https://www.dermis.net/bilder/CD021/550px/img0063.jpg>  
<https://www.dermis.net/bilder/CD021/550px/img0065.jpg>  
<https://www.dermis.net/bilder/CD193/550px/img0074.jpg>  
<https://www.dermis.net/bilder/CD192/550px/img0091.jpg>  
<https://www.dermis.net/bilder/CD192/550px/img0090.jpg>  
<https://www.dermis.net/bilder/CD008/550px/img0029.jpg>  
<https://www.dermis.net/bilder/CD198/550px/img0167.jpg>

<https://www.dermis.net/bilder/CD008/550px/img0005.jpg>  
<https://www.dermis.net/bilder/CD055/550px/img0032.jpg>  
<https://www.dermis.net/bilder/CD055/550px/img0039.jpg>  
<https://www.dermis.net/bilder/CD197/550px/img0071.jpg>  
<https://www.dermis.net/bilder/CD055/550px/img0025.jpg>  
<https://www.dermis.net/bilder/CD033/550px/img0049.jpg>  
<https://www.dermis.net/bilder/CD191/550px/img0107.jpg>  
<https://www.dermis.net/bilder/CD191/550px/img0106.jpg>  
<https://www.dermis.net/bilder/CD005/550px/img0104.jpg>  
<https://www.dermis.net/bilder/CD033/550px/img0058.jpg>  
<https://www.dermis.net/bilder/CD036/550px/img0001.jpg>  
<https://www.dermis.net/bilder/CD198/550px/img0129.jpg>  
<https://www.dermis.net/bilder/CD210/550px/img0126.jpg>  
<https://www.dermis.net/bilder/CD210/550px/img0087.jpg>  
<https://www.dermis.net/bilder/CD001/550px/img0077.jpg>  
<https://www.dermis.net/bilder/CD184/550px/img0073.jpg>  
<https://www.dermis.net/bilder/CD190/550px/img0050.jpg>  
<https://www.dermis.net/bilder/CD190/550px/img0051.jpg>  
<https://www.dermis.net/bilder/CD199/550px/img0017.jpg>  
<https://www.dermis.net/bilder/CD199/550px/img0018.jpg>  
<https://www.dermis.net/bilder/CD199/550px/img0063.jpg>  
<https://www.dermis.net/bilder/CD199/550px/img0064.jpg>  
<https://www.dermis.net/bilder/CD051/550px/img0001.jpg>  
<https://www.dermis.net/bilder/CD001/550px/img0012.jpg>  
<https://www.dermis.net/bilder/CD036/550px/img0047.jpg>  
<https://www.dermis.net/bilder/CD043/550px/img0002.jpg>  
<https://www.dermis.net/bilder/CD181/550px/img0030.jpg>  
<https://www.dermis.net/bilder/CD181/550px/img0033.jpg>  
<https://www.dermis.net/bilder/CD181/550px/img0035.jpg>  
<https://www.dermis.net/bilder/CD181/550px/img0034.jpg>  
<https://www.dermis.net/bilder/CD181/550px/img0032.jpg>  
<https://www.dermis.net/bilder/CD181/550px/img0031.jpg>  
<https://www.dermis.net/bilder/CD179/550px/img0006.jpg>  
<https://www.dermis.net/bilder/CD185/550px/img0027.jpg>  
<https://www.dermis.net/bilder/CD185/550px/img0028.jpg>  
<https://www.dermis.net/bilder/CD185/550px/img0030.jpg>  
<https://www.dermis.net/bilder/CD185/550px/img0031.jpg>  
<https://www.dermis.net/bilder/CD210/550px/img0021.jpg>  
<https://www.dermis.net/bilder/CD184/550px/img0097.jpg>  
<https://www.dermis.net/bilder/CD183/550px/img0050.jpg>  
<https://www.dermis.net/bilder/CD183/550px/img0051.jpg>  
<https://www.dermis.net/bilder/CD185/550px/img0060.jpg>  
<https://www.dermis.net/bilder/CD185/550px/img0061.jpg>  
<https://www.dermis.net/bilder/CD182/550px/img0042.jpg>  
<https://www.dermis.net/bilder/CD182/550px/img0041.jpg>  
<https://www.dermis.net/bilder/CD180/550px/img0045.jpg>  
<https://www.dermis.net/bilder/CD195/550px/img0004.jpg>  
<https://www.dermis.net/bilder/CD210/550px/img0014.jpg>

<https://www.dermis.net/bilder/CD001/550px/img0018.jpg>  
<https://www.dermis.net/bilder/CD021/550px/img0038.jpg>  
<https://www.dermis.net/bilder/CD179/550px/img0023.jpg>  
<https://www.dermis.net/bilder/CD189/550px/img0058.jpg>  
<https://www.dermis.net/bilder/CD189/550px/img0061.jpg>  
<https://www.dermis.net/bilder/CD194/550px/img0063.jpg>  
<https://www.dermis.net/bilder/CD192/550px/img0009.jpg>  
<https://www.dermis.net/bilder/CD211/550px/img0058.jpg>  
<https://www.dermis.net/bilder/CD185/550px/img0096.jpg>  
<https://www.dermis.net/bilder/CD197/550px/img0068.jpg>  
<https://www.dermis.net/bilder/CD197/550px/img0069.jpg>  
<https://www.dermis.net/bilder/CD187/550px/img0093.jpg>  
<https://www.dermis.net/bilder/CD187/550px/img0094.jpg>  
<https://www.dermis.net/bilder/CD185/550px/img0099.jpg>  
<https://www.dermis.net/bilder/CD193/550px/img0009.jpg>  
<https://www.dermis.net/bilder/CD192/550px/img0073.jpg>  
<https://www.dermis.net/bilder/CD001/550px/img0032.jpg>  
<https://www.dermis.net/bilder/CD198/550px/img0178.jpg>  
<https://www.dermis.net/bilder/CD198/550px/img0179.jpg>  
<https://www.dermis.net/bilder/CD188/550px/img0013.jpg>  
<https://www.dermis.net/bilder/CD188/550px/img0014.jpg>  
<https://www.dermis.net/bilder/CD188/550px/img0015.jpg>  
<https://www.dermis.net/bilder/CD189/550px/img0001.jpg>  
<https://www.dermis.net/bilder/CD008/550px/img0008.jpg>  
<https://www.dermis.net/bilder/CD178/550px/img0070.jpg>  
<https://www.dermis.net/bilder/CD199/550px/img0047.jpg>  
<https://www.dermis.net/bilder/CD190/550px/img0019.jpg>  
<https://www.dermis.net/bilder/CD190/550px/img0020.jpg>  
<https://www.dermis.net/bilder/CD194/550px/img0108.jpg>  
<https://www.dermis.net/bilder/CD197/550px/img0077.jpg>  
<https://www.dermis.net/bilder/CD195/550px/img0111.jpg>  
<https://www.dermis.net/bilder/CD181/550px/img0064.jpg>  
<https://www.dermis.net/bilder/CD194/550px/img0100.jpg>  
<https://www.dermis.net/bilder/CD198/550px/img0006.jpg>  
<https://www.dermis.net/bilder/CD196/550px/img0085.jpg>  
<https://www.dermis.net/bilder/CD021/550px/img0072.jpg>  
<https://www.dermis.net/bilder/CD033/550px/img0042.jpg>  
<https://www.dermis.net/bilder/CD002/550px/img0096.jpg>  
<https://www.dermis.net/bilder/CD014/550px/img0025.jpg>  
<https://www.dermis.net/bilder/CD007/550px/img0044.jpg>  
<https://www.dermis.net/bilder/CD021/550px/img0013.jpg>  
<https://www.dermis.net/bilder/CD041/550px/img0022.jpg>  
<https://www.dermis.net/bilder/CD071/550px/img0044.jpg>  
<https://www.dermis.net/bilder/CD056/550px/img0006.jpg>  
<https://www.dermis.net/bilder/CD071/550px/img0045.jpg>  
<https://www.dermis.net/bilder/CD034/550px/img0075.jpg>  
<https://www.dermis.net/bilder/CD056/550px/img0007.jpg>  
<https://www.dermis.net/bilder/CD056/550px/img0047.jpg>

<https://www.dermis.net/bilder/CD014/550px/img0055.jpg>  
<https://www.dermis.net/bilder/CD070/550px/img0038.jpg>  
<https://www.dermis.net/bilder/CD069/550px/img0090.jpg>  
<https://www.dermis.net/bilder/CD040/550px/img0066.jpg>  
<https://www.dermis.net/bilder/CD069/550px/img0091.jpg>  
<https://www.dermis.net/bilder/CD056/550px/img0020.jpg>  
<https://www.dermis.net/bilder/CD034/550px/img0059.jpg>  
<https://www.dermis.net/bilder/CD042/550px/img0077.jpg>  
<https://www.dermis.net/bilder/CD069/550px/img0092.jpg>  
<https://www.dermis.net/bilder/CD069/550px/img0109.jpg>  
<https://www.dermis.net/bilder/CD069/550px/img0112.jpg>  
<https://www.dermis.net/bilder/CD071/550px/img0014.jpg>  
<https://www.dermis.net/bilder/CD069/550px/img0110.jpg>  
<https://www.dermis.net/bilder/CD025/550px/img0047.jpg>  
<https://www.dermis.net/bilder/CD070/550px/img0044.jpg>  
<https://www.dermis.net/bilder/CD071/550px/img0110.jpg>  
<https://www.dermis.net/bilder/CD071/550px/img0033.jpg>  
<https://www.dermis.net/bilder/CD071/550px/img0034.jpg>  
<https://www.dermis.net/bilder/CD018/550px/img0116.jpg>  
<https://www.dermis.net/bilder/CD070/550px/img0040.jpg>  
<https://www.dermis.net/bilder/CD020/550px/img0038.jpg>  
<https://www.dermis.net/bilder/CD020/550px/img0040.jpg>  
<https://www.dermis.net/bilder/CD070/550px/img0094.jpg>  
<https://www.dermis.net/bilder/CD056/550px/img0012.jpg>  
<https://www.dermis.net/bilder/CD056/550px/img0026.jpg>  
<https://www.dermis.net/bilder/CD050/550px/img0030.jpg>  
<https://www.dermis.net/bilder/CD050/550px/img0031.jpg>  
<https://www.dermis.net/bilder/CD071/550px/img0012.jpg>  
<https://www.dermis.net/bilder/CD057/550px/img0011.jpg>  
<https://www.dermis.net/bilder/CD006/550px/img0005.jpg>  
<https://www.dermis.net/bilder/CD018/550px/img0041.jpg>  
<https://www.dermis.net/bilder/CD071/550px/img0030.jpg>  
<https://www.dermis.net/bilder/CD048/550px/img0036.jpg>  
<https://www.dermis.net/bilder/CD048/550px/img0037.jpg>  
<https://www.dermis.net/bilder/CD005/550px/img0003.jpg>  
<https://www.dermis.net/bilder/CD071/550px/img0047.jpg>  
<https://www.dermis.net/bilder/CD018/550px/img0065.jpg>  
<https://www.dermis.net/bilder/CD069/550px/img0083.jpg>  
<https://www.dermis.net/bilder/CD035/550px/img0012.jpg>  
<https://www.dermis.net/bilder/CD037/550px/img0070.jpg>  
<https://www.dermis.net/bilder/CD006/550px/img0081.jpg>  
<https://www.dermis.net/bilder/CD020/550px/img0079.jpg>  
<https://www.dermis.net/bilder/CD020/550px/img0080.jpg>  
<https://www.dermis.net/bilder/CD043/550px/img0009.jpg>  
<https://www.dermis.net/bilder/CD035/550px/img0010.jpg>  
<https://www.dermis.net/bilder/CD069/550px/img0080.jpg>  
<https://www.dermis.net/bilder/CD058/550px/img0075.jpg>  
<https://www.dermis.net/bilder/CD026/550px/img0024.jpg>



<https://www.dermis.net/bilder/CD069/550px/img0013.jpg>  
<https://www.dermis.net/bilder/CD069/550px/img0014.jpg>  
<https://www.dermis.net/bilder/CD069/550px/img0015.jpg>  
<https://www.dermis.net/bilder/CD069/550px/img0016.jpg>  
<https://www.dermis.net/bilder/CD058/550px/img0076.jpg>  
<https://www.dermis.net/bilder/CD006/550px/img0034.jpg>  
<https://www.dermis.net/bilder/CD069/550px/img0019.jpg>  
<https://www.dermis.net/bilder/CD069/550px/img0020.jpg>  
<https://www.dermis.net/bilder/CD004/550px/img0067.jpg>  
<https://www.dermis.net/bilder/CD070/550px/img0035.jpg>  
<https://www.dermis.net/bilder/CD015/550px/img0018.jpg>  
<https://www.dermis.net/bilder/CD047/550px/img0047.jpg>  
<https://www.dermis.net/bilder/CD069/550px/img0010.jpg>  
<https://www.dermis.net/bilder/CD005/550px/img0032.jpg>  
<https://www.dermis.net/bilder/CD018/550px/img0107.jpg>  
<https://www.dermis.net/bilder/CD069/550px/img0011.jpg>  
<https://www.dermis.net/bilder/CD052/550px/img0015.jpg>  
<https://www.dermis.net/bilder/CD056/550px/img0056.jpg>  
<https://www.dermis.net/bilder/CD018/550px/img0058.jpg>  
<https://www.dermis.net/bilder/CD051/550px/img0078.jpg>  
<https://www.dermis.net/bilder/CD021/550px/img0085.jpg>  
<https://www.dermis.net/bilder/CD069/550px/img0077.jpg>  
<https://www.dermis.net/bilder/CD001/550px/img0045.jpg>  
<https://www.dermis.net/bilder/CD016/550px/img0061.jpg>  
<https://www.dermis.net/bilder/CD069/550px/img0076.jpg>  
<https://www.dermis.net/bilder/CD071/550px/img0035.jpg>  
<https://www.dermis.net/bilder/CD023/550px/img0046.jpg>  
<https://www.dermis.net/bilder/CD051/550px/img0031.jpg>  
<https://www.dermis.net/bilder/CD006/550px/img0050.jpg>  
<https://www.dermis.net/bilder/CD020/550px/img0041.jpg>  
<https://www.dermis.net/bilder/CD020/550px/img0042.jpg>  
<https://www.dermis.net/bilder/CD054/550px/img0012.jpg>  
<https://www.dermis.net/bilder/CD005/550px/img0021.jpg>  
<https://www.dermis.net/bilder/CD016/550px/img0029.jpg>  
<https://www.dermis.net/bilder/CD006/550px/img0026.jpg>  
<https://www.dermis.net/bilder/CD002/550px/img0077.jpg>  
<https://www.dermis.net/bilder/CD071/550px/img0006.jpg>  
<https://www.dermis.net/bilder/CD005/550px/img0095.jpg>  
<https://www.dermis.net/bilder/CD048/550px/img0065.jpg>  
<https://www.dermis.net/bilder/CD007/550px/img0026.jpg>  
<https://www.dermis.net/bilder/CD041/550px/img0026.jpg>  
<https://www.dermis.net/bilder/CD018/550px/img0085.jpg>  
<https://www.dermis.net/bilder/CD036/550px/img0082.jpg>  
<https://www.dermis.net/bilder/CD006/550px/img0097.jpg>  
<https://www.dermis.net/bilder/CD034/550px/img0093.jpg>  
<https://www.dermis.net/bilder/CD034/550px/img0096.jpg>  
<https://www.dermis.net/bilder/CD006/550px/img0096.jpg>  
<https://www.dermis.net/bilder/CD007/550px/img0030.jpg>

<https://www.dermis.net/bilder/CD056/550px/img0013.jpg>  
<https://www.dermis.net/bilder/CD007/550px/img0028.jpg>  
<https://www.dermis.net/bilder/CD020/550px/img0029.jpg>  
<https://www.dermis.net/bilder/CD020/550px/img0030.jpg>  
<https://www.dermis.net/bilder/CD020/550px/img0031.jpg>  
<https://www.dermis.net/bilder/CD028/550px/img0058.jpg>  
<https://www.dermis.net/bilder/CD028/550px/img0059.jpg>  
<https://www.dermis.net/bilder/CD044/550px/img0039.jpg>  
<https://www.dermis.net/bilder/CD051/550px/img0021.jpg>  
<https://www.dermis.net/bilder/CD043/550px/img0021.jpg>  
<https://www.dermis.net/bilder/CD023/550px/img0034.jpg>  
<https://www.dermis.net/bilder/CD071/550px/img0023.jpg>  
<https://www.dermis.net/bilder/CD007/550px/img0045.jpg>  
<https://www.dermis.net/bilder/CD034/550px/img0026.jpg>  
<https://www.dermis.net/bilder/CD034/550px/img0025.jpg>  
<https://www.dermis.net/bilder/CD023/550px/img0030.jpg>  
<https://www.dermis.net/bilder/CD071/550px/img0024.jpg>  
<https://www.dermis.net/bilder/CD046/550px/img0048.jpg>  
<https://www.dermis.net/bilder/CD052/550px/img0089.jpg>  
<https://www.dermis.net/bilder/CD052/550px/img0090.jpg>  
<https://www.dermis.net/bilder/CD052/550px/img0091.jpg>  
<https://www.dermis.net/bilder/CD046/550px/img0047.jpg>  
<https://www.dermis.net/bilder/CD017/550px/img0088.jpg>  
<https://www.dermis.net/bilder/CD020/550px/img0025.jpg>  
<https://www.dermis.net/bilder/CD070/550px/img0068.jpg>  
<https://www.dermis.net/bilder/CD014/550px/img0008.jpg>  
<https://www.dermis.net/bilder/CD006/550px/img0019.jpg>  
<https://www.dermis.net/bilder/CD007/550px/img0034.jpg>  
<https://www.dermis.net/bilder/CD056/550px/img0049.jpg>  
<https://www.dermis.net/bilder/CD018/550px/img0074.jpg>  
<https://www.dermis.net/bilder/CD018/550px/img0075.jpg>  
<https://www.dermis.net/bilder/CD052/550px/img0056.jpg>  
<https://www.dermis.net/bilder/CD052/550px/img0049.jpg>  
<https://www.dermis.net/bilder/CD023/550px/img0071.jpg>  
<https://www.dermis.net/bilder/CD023/550px/img0073.jpg>  
<https://www.dermis.net/bilder/CD042/550px/img0007.jpg>  
<https://www.dermis.net/bilder/CD023/550px/img0072.jpg>  
<https://www.dermis.net/bilder/CD034/550px/img0066.jpg>  
<https://www.dermis.net/bilder/CD034/550px/img0067.jpg>  
<https://www.dermis.net/bilder/CD042/550px/img0006.jpg>  
<https://www.dermis.net/bilder/CD020/550px/img0069.jpg>  
<https://www.dermis.net/bilder/CD005/550px/img0050.jpg>  
<https://www.dermis.net/bilder/CD004/550px/img0068.jpg>  
<https://www.dermis.net/bilder/CD069/550px/img0017.jpg>  
<https://www.dermis.net/bilder/CD008/550px/img0033.jpg>  
<https://www.dermis.net/bilder/CD058/550px/img0015.jpg>  
<https://www.dermis.net/bilder/CD058/550px/img0020.jpg>  
<https://www.dermis.net/bilder/CD034/550px/img0064.jpg>

<https://www.dermis.net/bilder/CD044/550px/img0089.jpg>  
<https://www.dermis.net/bilder/CD044/550px/img0090.jpg>  
<https://www.dermis.net/bilder/CD052/550px/img0034.jpg>  
<https://www.dermis.net/bilder/CD020/550px/img0093.jpg>  
<https://www.dermis.net/bilder/CD040/550px/img0034.jpg>  
<https://www.dermis.net/bilder/CD029/550px/img0018.jpg>  
<https://www.dermis.net/bilder/CD029/550px/img0025.jpg>  
<https://www.dermis.net/bilder/CD029/550px/img0027.jpg>  
<https://www.dermis.net/bilder/CD029/550px/img0028.jpg>  
<https://www.dermis.net/bilder/CD003/550px/img0005.jpg>  
<https://www.dermis.net/bilder/CD006/550px/img0056.jpg>  
<https://www.dermis.net/bilder/CD047/550px/img0078.jpg>  
<https://www.dermis.net/bilder/CD017/550px/img0099.jpg>  
<https://www.dermis.net/bilder/CD005/550px/img0017.jpg>  
<https://www.dermis.net/bilder/CD047/550px/img0077.jpg>  
<https://www.dermis.net/bilder/CD025/550px/img0086.jpg>  
<https://www.dermis.net/bilder/CD025/550px/img0087.jpg>  
<https://www.dermis.net/bilder/CD025/550px/img0088.jpg>  
<https://www.dermis.net/bilder/CD024/550px/img0058.jpg>  
<https://www.dermis.net/bilder/CD024/550px/img0059.jpg>  
<https://www.dermis.net/bilder/CD007/550px/img0040.jpg>  
<https://www.dermis.net/bilder/CD036/550px/img0063.jpg>  
<https://www.dermis.net/bilder/CD006/550px/img0057.jpg>  
<https://www.dermis.net/bilder/CD040/550px/img0005.jpg>  
<https://www.dermis.net/bilder/CD040/550px/img0006.jpg>  
<https://www.dermis.net/bilder/CD040/550px/img0007.jpg>  
<https://www.dermis.net/bilder/CD040/550px/img0012.jpg>  
<https://www.dermis.net/bilder/CD046/550px/img0099.jpg>  
<https://www.dermis.net/bilder/CD027/550px/img0061.jpg>  
<https://www.dermis.net/bilder/CD027/550px/img0062.jpg>  
<https://www.dermis.net/bilder/CD027/550px/img0063.jpg>  
<https://www.dermis.net/bilder/CD019/550px/img0008.jpg>  
<https://www.dermis.net/bilder/CD003/550px/img0008.jpg>  
<https://www.dermis.net/bilder/CD008/550px/img0037.jpg>  
<https://www.dermis.net/bilder/CD024/550px/img0097.jpg>  
<https://www.dermis.net/bilder/CD015/550px/img0048.jpg>  
<https://www.dermis.net/bilder/CD006/550px/img0017.jpg>  
<https://www.dermis.net/bilder/CD016/550px/img0058.jpg>  
<https://www.dermis.net/bilder/CD041/550px/img0028.jpg>  
<https://www.dermis.net/bilder/CD052/550px/img0019.jpg>  
<https://www.dermis.net/bilder/CD054/550px/img0059.jpg>  
<https://www.dermis.net/bilder/CD054/550px/img0060.jpg>  
<https://www.dermis.net/bilder/CD054/550px/img0061.jpg>  
<https://www.dermis.net/bilder/CD006/550px/img0018.jpg>  
<https://www.dermis.net/bilder/CD006/550px/img0021.jpg>  
<https://www.dermis.net/bilder/CD006/550px/img0042.jpg>  
<https://www.dermis.net/bilder/CD005/550px/img0108.jpg>  
<https://www.dermis.net/bilder/CD034/550px/img0049.jpg>

<https://www.dermis.net/bilder/CD023/550px/img0075.jpg>  
<https://www.dermis.net/bilder/CD023/550px/img0076.jpg>  
<https://www.dermis.net/bilder/CD008/550px/img0051.jpg>  
<https://www.dermis.net/bilder/CD048/550px/img0096.jpg>  
<https://www.dermis.net/bilder/CD043/550px/img0028.jpg>  
<https://www.dermis.net/bilder/CD040/550px/img0049.jpg>  
<https://www.dermis.net/bilder/CD034/550px/img0050.jpg>  
<https://www.dermis.net/bilder/CD054/550px/img0053.jpg>  
<https://www.dermis.net/bilder/CD054/550px/img0054.jpg>  
<https://www.dermis.net/bilder/CD037/550px/img0036.jpg>  
<https://www.dermis.net/bilder/CD046/550px/img0006.jpg>  
<https://www.dermis.net/bilder/CD046/550px/img0007.jpg>  
<https://www.dermis.net/bilder/CD046/550px/img0008.jpg>  
<https://www.dermis.net/bilder/CD020/550px/img0084.jpg>  
<https://www.dermis.net/bilder/CD049/550px/img0043.jpg>  
<https://www.dermis.net/bilder/CD049/550px/img0044.jpg>  
<https://www.dermis.net/bilder/CD046/550px/img0081.jpg>  
<https://www.dermis.net/bilder/CD046/550px/img0082.jpg>  
<https://www.dermis.net/bilder/CD049/550px/img0042.jpg>  
<https://www.dermis.net/bilder/CD027/550px/img0013.jpg>  
<https://www.dermis.net/bilder/CD027/550px/img0014.jpg>  
<https://www.dermis.net/bilder/CD003/550px/img0001.jpg>  
<https://www.dermis.net/bilder/CD050/550px/img0032.jpg>  
<https://www.dermis.net/bilder/CD037/550px/img0045.jpg>  
<https://www.dermis.net/bilder/CD005/550px/img0085.jpg>  
<https://www.dermis.net/bilder/CD006/550px/img0094.jpg>  
<https://www.dermis.net/bilder/CD004/550px/img0086.jpg>  
<https://www.dermis.net/bilder/CD005/550px/img0022.jpg>  
<https://www.dermis.net/bilder/CD055/550px/img0037.jpg>  
<https://www.dermis.net/bilder/CD023/550px/img0008.jpg>  
<https://www.dermis.net/bilder/CD018/550px/img0094.jpg>  
<https://www.dermis.net/bilder/CD026/550px/img0079.jpg>  
<https://www.dermis.net/bilder/CD026/550px/img0080.jpg>  
<https://www.dermis.net/bilder/CD017/550px/img0092.jpg>  
<https://www.dermis.net/bilder/CD051/550px/img0012.jpg>  
<https://www.dermis.net/bilder/CD051/550px/img0013.jpg>  
<https://www.dermis.net/bilder/CD034/550px/img0020.jpg>  
<https://www.dermis.net/bilder/CD034/550px/img0019.jpg>  
<https://www.dermis.net/bilder/CD051/550px/img0106.jpg>  
<https://www.dermis.net/bilder/CD050/550px/img0081.jpg>  
<https://www.dermis.net/bilder/CD021/550px/img0086.jpg>  
<https://www.dermis.net/bilder/CD056/550px/img0015.jpg>  
<https://www.dermis.net/bilder/CD047/550px/img0084.jpg>  
<https://www.dermis.net/bilder/CD042/550px/img0036.jpg>  
<https://www.dermis.net/bilder/CD042/550px/img0037.jpg>  
<https://www.dermis.net/bilder/CD006/550px/img0092.jpg>  
<https://www.dermis.net/bilder/CD024/550px/img0051.jpg>  
<https://www.dermis.net/bilder/CD004/550px/img0050.jpg>

<https://www.dermis.net/bilder/CD018/550px/img0012.jpg>  
<https://www.dermis.net/bilder/CD052/550px/img0071.jpg>  
<https://www.dermis.net/bilder/CD052/550px/img0072.jpg>  
<https://www.dermis.net/bilder/CD024/550px/img0002.jpg>  
<https://www.dermis.net/bilder/CD042/550px/img0040.jpg>  
<https://www.dermis.net/bilder/CD036/550px/img0046.jpg>  
<https://www.dermis.net/bilder/CD042/550px/img0041.jpg>  
<https://www.dermis.net/bilder/CD039/550px/img0008.jpg>  
<https://www.dermis.net/bilder/CD039/550px/img0009.jpg>  
<https://www.dermis.net/bilder/CD018/550px/img0105.jpg>  
<https://www.dermis.net/bilder/CD044/550px/img0052.jpg>  
<https://www.dermis.net/bilder/CD015/550px/img0004.jpg>  
<https://www.dermis.net/bilder/CD036/550px/img0035.jpg>  
<https://www.dermis.net/bilder/CD035/550px/img0015.jpg>  
<https://www.dermis.net/bilder/CD035/550px/img0014.jpg>  
<https://www.dermis.net/bilder/CD006/550px/img0023.jpg>  
<https://www.dermis.net/bilder/CD007/550px/img0053.jpg>  
<https://www.dermis.net/bilder/CD008/550px/img0052.jpg>  
<https://www.dermis.net/bilder/CD020/550px/img0017.jpg>  
<https://www.dermis.net/bilder/CD033/550px/img0051.jpg>  
<https://www.dermis.net/bilder/CD048/550px/img0022.jpg>  
<https://www.dermis.net/bilder/CD033/550px/img0069.jpg>  
<https://www.dermis.net/bilder/CD033/550px/img0070.jpg>  
<https://www.dermis.net/bilder/CD018/550px/img0097.jpg>  
<https://www.dermis.net/bilder/CD032/550px/img0065.jpg>  
<https://www.dermis.net/bilder/CD032/550px/img0066.jpg>  
<https://www.dermis.net/bilder/CD032/550px/img0067.jpg>  
<https://www.dermis.net/bilder/CD048/550px/img0031.jpg>  
<https://www.dermis.net/bilder/CD048/550px/img0032.jpg>  
<https://www.dermis.net/bilder/CD048/550px/img0033.jpg>  
<https://www.dermis.net/bilder/CD041/550px/img0030.jpg>  
<https://www.dermis.net/bilder/CD024/550px/img0040.jpg>  
<https://www.dermis.net/bilder/CD024/550px/img0039.jpg>  
<https://www.dermis.net/bilder/CD057/550px/img0034.jpg>  
<https://www.dermis.net/bilder/CD039/550px/img0099.jpg>  
<https://www.dermis.net/bilder/CD016/550px/img0052.jpg>  
<https://www.dermis.net/bilder/CD021/550px/img0088.jpg>  
<https://www.dermis.net/bilder/CD005/550px/img0101.jpg>  
<https://www.dermis.net/bilder/CD005/550px/img0083.jpg>  
<https://www.dermis.net/bilder/CD046/550px/img0041.jpg>  
<https://www.dermis.net/bilder/CD046/550px/img0042.jpg>  
<https://www.dermis.net/bilder/CD046/550px/img0043.jpg>  
<https://www.dermis.net/bilder/CD046/550px/img0044.jpg>  
<https://www.dermis.net/bilder/CD039/550px/img0005.jpg>  
<https://www.dermis.net/bilder/CD039/550px/img0006.jpg>  
<https://www.dermis.net/bilder/CD017/550px/img0084.jpg>  
<https://www.dermis.net/bilder/CD034/550px/img0054.jpg>  
<https://www.dermis.net/bilder/CD051/550px/img0100.jpg>

<https://www.dermis.net/bilder/CD051/550px/img0101.jpg>  
<https://www.dermis.net/bilder/CD020/550px/img0028.jpg>  
<https://www.dermis.net/bilder/CD034/550px/img0052.jpg>  
<https://www.dermis.net/bilder/CD034/550px/img0053.jpg>  
<https://www.dermis.net/bilder/CD003/550px/img0094.jpg>  
<https://www.dermis.net/bilder/CD026/550px/img0081.jpg>  
<https://www.dermis.net/bilder/CD005/550px/img0060.jpg>  
<https://www.dermis.net/bilder/CD034/550px/img0083.jpg>  
<https://www.dermis.net/bilder/CD034/550px/img0084.jpg>  
<https://www.dermis.net/bilder/CD032/550px/img0036.jpg>  
<https://www.dermis.net/bilder/CD032/550px/img0037.jpg>  
<https://www.dermis.net/bilder/CD024/550px/img0076.jpg>  
<https://www.dermis.net/bilder/CD024/550px/img0077.jpg>  
<https://www.dermis.net/bilder/CD024/550px/img0078.jpg>  
<https://www.dermis.net/bilder/CD024/550px/img0079.jpg>  
<https://www.dermis.net/bilder/CD024/550px/img0080.jpg>  
<https://www.dermis.net/bilder/CD027/550px/img0098.jpg>  
<https://www.dermis.net/bilder/CD006/550px/img0091.jpg>  
<https://www.dermis.net/bilder/CD003/550px/img0010.jpg>  
<https://www.dermis.net/bilder/CD020/550px/img0021.jpg>  
<https://www.dermis.net/bilder/CD020/550px/img0022.jpg>  
<https://www.dermis.net/bilder/CD049/550px/img0098.jpg>  
<https://www.dermis.net/bilder/CD020/550px/img0023.jpg>  
<https://www.dermis.net/bilder/CD058/550px/img0086.jpg>  
<https://www.dermis.net/bilder/CD058/550px/img0087.jpg>  
<https://www.dermis.net/bilder/CD008/550px/img0053.jpg>  
<https://www.dermis.net/bilder/CD024/550px/img0011.jpg>  
<https://www.dermis.net/bilder/CD024/550px/img0012.jpg>  
<https://www.dermis.net/bilder/CD049/550px/img0081.jpg>  
<https://www.dermis.net/bilder/CD049/550px/img0082.jpg>  
<https://www.dermis.net/bilder/CD015/550px/img0006.jpg>  
<https://www.dermis.net/bilder/CD003/550px/img0037.jpg>  
<https://www.dermis.net/bilder/CD039/550px/img0045.jpg>  
<https://www.dermis.net/bilder/CD039/550px/img0046.jpg>  
<https://www.dermis.net/bilder/CD049/550px/img0072.jpg>  
<https://www.dermis.net/bilder/CD033/550px/img0084.jpg>  
<https://www.dermis.net/bilder/CD047/550px/img0002.jpg>  
<https://www.dermis.net/bilder/CD047/550px/img0003.jpg>  
<https://www.dermis.net/bilder/CD007/550px/img0051.jpg>  
<https://www.dermis.net/bilder/CD049/550px/img0071.jpg>  
<https://www.dermis.net/bilder/CD036/550px/img0043.jpg>  
<https://www.dermis.net/bilder/CD041/550px/img0007.jpg>  
<https://www.dermis.net/bilder/CD041/550px/img0009.jpg>  
<https://www.dermis.net/bilder/CD037/550px/img0016.jpg>  
<https://www.dermis.net/bilder/CD004/550px/img0077.jpg>  
<https://www.dermis.net/bilder/CD050/550px/img0059.jpg>  
<https://www.dermis.net/bilder/CD050/550px/img0060.jpg>  
<https://www.dermis.net/bilder/CD003/550px/img0050.jpg>

<https://www.dermis.net/bilder/CD004/550px/img0066.jpg>  
<https://www.dermis.net/bilder/CD037/550px/img0061.jpg>  
<https://www.dermis.net/bilder/CD024/550px/img0045.jpg>  
<https://www.dermis.net/bilder/CD027/550px/img0058.jpg>  
<https://www.dermis.net/bilder/CD034/550px/img0086.jpg>  
<https://www.dermis.net/bilder/CD034/550px/img0085.jpg>  
<https://www.dermis.net/bilder/CD052/550px/img0038.jpg>  
<https://www.dermis.net/bilder/CD050/550px/img0097.jpg>  
<https://www.dermis.net/bilder/CD054/550px/img0087.jpg>  
<https://www.dermis.net/bilder/CD051/550px/img0044.jpg>  
<https://www.dermis.net/bilder/CD051/550px/img0045.jpg>  
<https://www.dermis.net/bilder/CD051/550px/img0046.jpg>  
<https://www.dermis.net/bilder/CD051/550px/img0047.jpg>  
<https://www.dermis.net/bilder/CD051/550px/img0048.jpg>  
<https://www.dermis.net/bilder/CD051/550px/img0030.jpg>  
<https://www.dermis.net/bilder/CD023/550px/img0012.jpg>  
<https://www.dermis.net/bilder/CD032/550px/img0078.jpg>  
<https://www.dermis.net/bilder/CD051/550px/img0029.jpg>  
<https://www.dermis.net/bilder/CD056/550px/img0014.jpg>  
<https://www.dermis.net/bilder/CD003/550px/img0038.jpg>  
<https://www.dermis.net/bilder/CD036/550px/img0002.jpg>  
<https://www.dermis.net/bilder/CD004/550px/img0065.jpg>  
<https://www.dermis.net/bilder/CD046/550px/img0064.jpg>  
<https://www.dermis.net/bilder/CD017/550px/img0090.jpg>  
<https://www.dermis.net/bilder/CD036/550px/img0003.jpg>  
<https://www.dermis.net/bilder/CD016/550px/img0001.jpg>  
<https://www.dermis.net/bilder/CD055/550px/img0031.jpg>  
<https://www.dermis.net/bilder/CD049/550px/img0066.jpg>  
<https://www.dermis.net/bilder/CD048/550px/img0066.jpg>  
<https://www.dermis.net/bilder/CD048/550px/img0068.jpg>  
<https://www.dermis.net/bilder/CD054/550px/img0056.jpg>  
<https://www.dermis.net/bilder/CD054/550px/img0057.jpg>  
<https://www.dermis.net/bilder/CD001/550px/img0040.jpg>  
<https://www.dermis.net/bilder/CD041/550px/img0072.jpg>  
<https://www.dermis.net/bilder/CD052/550px/img0037.jpg>  
<https://www.dermis.net/bilder/CD050/550px/img0087.jpg>  
<https://www.dermis.net/bilder/CD050/550px/img0088.jpg>  
<https://www.dermis.net/bilder/CD048/550px/img0104.jpg>  
<https://www.dermis.net/bilder/CD044/550px/img0001.jpg>  
<https://www.dermis.net/bilder/CD003/550px/img0099.jpg>  
<https://www.dermis.net/bilder/CD040/550px/img0063.jpg>  
<https://www.dermis.net/bilder/CD036/550px/img0041.jpg>  
<https://www.dermis.net/bilder/CD026/550px/img0071.jpg>  
<https://www.dermis.net/bilder/CD026/550px/img0072.jpg>  
<https://www.dermis.net/bilder/CD027/550px/img0073.jpg>  
<https://www.dermis.net/bilder/CD027/550px/img0074.jpg>  
<https://www.dermis.net/bilder/CD026/550px/img0077.jpg>  
<https://www.dermis.net/bilder/CD028/550px/img0068.jpg>

<https://www.dermis.net/bilder/CD020/550px/img0034.jpg>  
<https://www.dermis.net/bilder/CD020/550px/img0035.jpg>  
<https://www.dermis.net/bilder/CD020/550px/img0036.jpg>  
<https://www.dermis.net/bilder/CD033/550px/img0040.jpg>  
<https://www.dermis.net/bilder/CD051/550px/img0038.jpg>  
<https://www.dermis.net/bilder/CD051/550px/img0037.jpg>  
<https://www.dermis.net/bilder/CD052/550px/img0043.jpg>  
<https://www.dermis.net/bilder/CD051/550px/img0103.jpg>  
<https://www.dermis.net/bilder/CD017/550px/img0102.jpg>  
<https://www.dermis.net/bilder/CD003/550px/img0042.jpg>  
<https://www.dermis.net/bilder/CD005/550px/img0026.jpg>  
<https://www.dermis.net/bilder/CD003/550px/img0095.jpg>  
<https://www.dermis.net/bilder/CD003/550px/img0020.jpg>  
<https://www.dermis.net/bilder/CD042/550px/img0086.jpg>  
<https://www.dermis.net/bilder/CD042/550px/img0088.jpg>  
<https://www.dermis.net/bilder/CD087/550px/img0019.jpg>  
<https://www.dermis.net/bilder/CD042/550px/img0091.jpg>  
<https://www.dermis.net/bilder/CD212/550px/img0025.jpg>  
<https://www.dermis.net/bilder/CD212/550px/img0114.jpg>  
<https://www.dermis.net/bilder/CD211/550px/img0004.jpg>  
<https://www.dermis.net/bilder/CD198/550px/img0071.jpg>  
<https://www.dermis.net/bilder/CD036/550px/img0017.jpg>  
<https://www.dermis.net/bilder/CD180/550px/img0072.jpg>  
<https://www.dermis.net/bilder/CD197/550px/img0017.jpg>  
<https://www.dermis.net/bilder/CD195/550px/img0098.jpg>  
<https://www.dermis.net/bilder/CD195/550px/img0099.jpg>  
<https://www.dermis.net/bilder/CD197/550px/img0036.jpg>  
<https://www.dermis.net/bilder/CD042/550px/img0022.jpg>  
<https://www.dermis.net/bilder/CD179/550px/img0028.jpg>  
<https://www.dermis.net/bilder/CD180/550px/img0034.jpg>  
<https://www.dermis.net/bilder/CD032/550px/img0039.jpg>  
<https://www.dermis.net/bilder/CD197/550px/img0024.jpg>  
<https://www.dermis.net/bilder/CD025/550px/img0073.jpg>  
<https://www.dermis.net/bilder/CD179/550px/img0027.jpg>  
<https://www.dermis.net/bilder/CD180/550px/img0071.jpg>  
<https://www.dermis.net/bilder/CD007/550px/img0110.jpg>  
<https://www.dermis.net/bilder/CD178/550px/img0036.jpg>  
<https://www.dermis.net/bilder/CD193/550px/img0149.jpg>  
<https://www.dermis.net/bilder/CD193/550px/img0150.jpg>  
<https://www.dermis.net/bilder/CD193/550px/img0151.jpg>  
<https://www.dermis.net/bilder/CD043/550px/img0026.jpg>  
<https://www.dermis.net/bilder/CD191/550px/img0113.jpg>  
<https://www.dermis.net/bilder/CD184/550px/img0091.jpg>  
<https://www.dermis.net/bilder/CD197/550px/img0014.jpg>  
<https://www.dermis.net/bilder/CD016/550px/img0057.jpg>  
<https://www.dermis.net/bilder/CD041/550px/img0037.jpg>  
<https://www.dermis.net/bilder/CD041/550px/img0033.jpg>  
<https://www.dermis.net/bilder/CD184/550px/img0002.jpg>



<https://www.dermis.net/bilder/CD211/550px/img0003.jpg>  
<https://www.dermis.net/bilder/CD033/550px/img0071.jpg>  
<https://www.dermis.net/bilder/CD196/550px/img0141.jpg>  
<https://www.dermis.net/bilder/CD017/550px/img0082.jpg>  
<https://www.dermis.net/bilder/CD042/550px/img0085.jpg>  
<https://www.dermis.net/bilder/CD035/550px/img0080.jpg>  
<https://www.dermis.net/bilder/CD197/550px/img0013.jpg>  
<https://www.dermis.net/bilder/CD040/550px/img0070.jpg>  
<https://www.dermis.net/bilder/CD041/550px/img0061.jpg>  
<https://www.dermis.net/bilder/CD178/550px/img0088.jpg>  
<https://www.dermis.net/bilder/CD178/550px/img0089.jpg>  
<https://www.dermis.net/bilder/CD196/550px/img0045.jpg>  
<https://www.dermis.net/bilder/CD054/550px/img0004.jpg>  
<https://www.dermis.net/bilder/CD008/550px/img0076.jpg>  
<https://www.dermis.net/bilder/CD199/550px/img0143.jpg>  
<https://www.dermis.net/bilder/CD197/550px/img0023.jpg>  
<https://www.dermis.net/bilder/CD197/550px/img0026.jpg>  
<https://www.dermis.net/bilder/CD052/550px/img0093.jpg>  
<https://www.dermis.net/bilder/CD025/550px/img0068.jpg>  
<https://www.dermis.net/bilder/CD055/550px/img0045.jpg>  
<https://www.dermis.net/bilder/CD179/550px/img0026.jpg>  
<https://www.dermis.net/bilder/CD195/550px/img0010.jpg>  
<https://www.dermis.net/bilder/CD197/550px/img0016.jpg>  
<https://www.dermis.net/bilder/CD043/550px/img0027.jpg>  
<https://www.dermis.net/bilder/CD184/550px/img0024.jpg>  
<https://www.dermis.net/bilder/CD184/550px/img0025.jpg>  
<https://www.dermis.net/bilder/CD041/550px/img0043.jpg>  
<https://www.dermis.net/bilder/CD041/550px/img0044.jpg>  
<https://www.dermis.net/bilder/CD189/550px/img0067.jpg>  
<https://www.dermis.net/bilder/CD042/550px/img0031.jpg>  
<https://www.dermis.net/bilder/CD011/550px/img0100.jpg>  
<https://www.dermis.net/bilder/CD021/550px/img0099.jpg>  
<https://www.dermis.net/bilder/CD199/550px/img0145.jpg>  
<https://www.dermis.net/bilder/CD199/550px/img0146.jpg>  
<https://www.dermis.net/bilder/CD199/550px/img0122.jpg>  
<https://www.dermis.net/bilder/CD199/550px/img0061.jpg>  
<https://www.dermis.net/bilder/CD001/550px/img0025.jpg>  
<https://www.dermis.net/bilder/CD196/550px/img0117.jpg>  
<https://www.dermis.net/bilder/CD199/550px/img0144.jpg>  
<https://www.dermis.net/bilder/CD012/550px/img0082.jpg>  
<https://www.dermis.net/bilder/CD187/550px/img0013.jpg>  
<https://www.dermis.net/bilder/CD187/550px/img0014.jpg>  
<https://www.dermis.net/bilder/CD196/550px/img0119.jpg>  
<https://www.dermis.net/bilder/CD041/550px/img0067.jpg>  
<https://www.dermis.net/bilder/CD180/550px/img0082.jpg>  
<https://www.dermis.net/bilder/CD040/550px/img0069.jpg>  
<https://www.dermis.net/bilder/CD191/550px/img0040.jpg>  
<https://www.dermis.net/bilder/CD191/550px/img0041.jpg>

<https://www.dermis.net/bilder/CD210/550px/img0114.jpg>  
<https://www.dermis.net/bilder/CD193/550px/img0093.jpg>  
<https://www.dermis.net/bilder/CD199/550px/img0001.jpg>  
<https://www.dermis.net/bilder/CD199/550px/img0129.jpg>  
<https://www.dermis.net/bilder/CD192/550px/img0026.jpg>  
<https://www.dermis.net/bilder/CD032/550px/img0049.jpg>  
<https://www.dermis.net/bilder/CD181/550px/img0062.jpg>  
<https://www.dermis.net/bilder/CD012/550px/img0028.jpg>  
<https://www.dermis.net/bilder/CD027/550px/img0031.jpg>  
<https://www.dermis.net/bilder/CD021/550px/img0081.jpg>  
<https://www.dermis.net/bilder/CD181/550px/img0087.jpg>  
<https://www.dermis.net/bilder/CD041/550px/img0046.jpg>  
<https://www.dermis.net/bilder/CD196/550px/img0044.jpg>  
<https://www.dermis.net/bilder/CD195/550px/img0073.jpg>  
<https://www.dermis.net/bilder/CD196/550px/img0038.jpg>  
<https://www.dermis.net/bilder/CD196/550px/img0039.jpg>  
<https://www.dermis.net/bilder/CD054/550px/img0006.jpg>  
<https://www.dermis.net/bilder/CD008/550px/img0083.jpg>  
<https://www.dermis.net/bilder/CD182/550px/img0064.jpg>  
<https://www.dermis.net/bilder/CD002/550px/img0065.jpg>  
<https://www.dermis.net/bilder/CD041/550px/img0048.jpg>  
<https://www.dermis.net/bilder/CD197/550px/img0081.jpg>  
<https://www.dermis.net/bilder/CD197/550px/img0082.jpg>  
<https://www.dermis.net/bilder/CD199/550px/img0135.jpg>  
<https://www.dermis.net/bilder/CD041/550px/img0047.jpg>  
<https://www.dermis.net/bilder/CD040/550px/img0011.jpg>  
<https://www.dermis.net/bilder/CD194/550px/img0154.jpg>  
<https://www.dermis.net/bilder/CD189/550px/img0093.jpg>  
<https://www.dermis.net/bilder/CD027/550px/img0039.jpg>  
<https://www.dermis.net/bilder/CD005/550px/img0090.jpg>  
<https://www.dermis.net/bilder/CD191/550px/img0016.jpg>  
<https://www.dermis.net/bilder/CD191/550px/img0017.jpg>  
<https://www.dermis.net/bilder/CD212/550px/img0049.jpg>  
<https://www.dermis.net/bilder/CD178/550px/img0014.jpg>  
<https://www.dermis.net/bilder/CD042/550px/img0010.jpg>  
<https://www.dermis.net/bilder/CD182/550px/img0040.jpg>  
<https://www.dermis.net/bilder/CD006/550px/img0061.jpg>  
<https://www.dermis.net/bilder/CD056/550px/img0063.jpg>  
<https://www.dermis.net/bilder/CD187/550px/img0033.jpg>  
<https://www.dermis.net/bilder/CD196/550px/img0107.jpg>  
<https://www.dermis.net/bilder/CD196/550px/img0110.jpg>  
<https://www.dermis.net/bilder/CD027/550px/img0028.jpg>  
<https://www.dermis.net/bilder/CD027/550px/img0029.jpg>  
<https://www.dermis.net/bilder/CD032/550px/img0038.jpg>  
<https://www.dermis.net/bilder/CD180/550px/img0029.jpg>  
<https://www.dermis.net/bilder/CD041/550px/img0086.jpg>  
<https://www.dermis.net/bilder/CD197/550px/img0039.jpg>  
<https://www.dermis.net/bilder/CD197/550px/img0040.jpg>

<https://www.dermis.net/bilder/CD197/550px/img0041.jpg>  
<https://www.dermis.net/bilder/CD194/550px/img0060.jpg>  
<https://www.dermis.net/bilder/CD197/550px/img0007.jpg>  
<https://www.dermis.net/bilder/CD185/550px/img0054.jpg>  
<https://www.dermis.net/bilder/CD202/550px/img0021.jpg>  
<https://www.dermis.net/bilder/CD181/550px/img0086.jpg>  
<https://www.dermis.net/bilder/CD003/550px/img0100.jpg>  
<https://www.dermis.net/bilder/CD041/550px/img0038.jpg>  
<https://www.dermis.net/bilder/CD041/550px/img0039.jpg>  
<https://www.dermis.net/bilder/CD041/550px/img0040.jpg>  
<https://www.dermis.net/bilder/CD021/550px/img0036.jpg>  
<https://www.dermis.net/bilder/CD198/550px/img0185.jpg>  
<https://www.dermis.net/bilder/CD008/550px/img0079.jpg>  
<https://www.dermis.net/bilder/CD193/550px/img0042.jpg>  
<https://www.dermis.net/bilder/CD189/550px/img0004.jpg>  
<https://www.dermis.net/bilder/CD189/550px/img0005.jpg>  
<https://www.dermis.net/bilder/CD197/550px/img0080.jpg>  
<https://www.dermis.net/bilder/CD194/550px/img0116.jpg>  
<https://www.dermis.net/bilder/CD196/550px/img0170.jpg>  
<https://www.dermis.net/bilder/CD196/550px/img0171.jpg>  
<https://www.dermis.net/bilder/CD195/550px/img0112.jpg>  
<https://www.dermis.net/bilder/CD195/550px/img0113.jpg>  
<https://www.dermis.net/bilder/CD014/550px/img0079.jpg>  
<https://www.dermis.net/bilder/CD013/550px/img0017.jpg>  
<https://www.dermis.net/bilder/CD022/550px/img0003.jpg>  
<https://www.dermis.net/bilder/CD042/550px/img0023.jpg>  
<https://www.dermis.net/bilder/CD178/550px/img0096.jpg>  
<https://www.dermis.net/bilder/CD178/550px/img0097.jpg>  
<https://www.dermis.net/bilder/CD178/550px/img0098.jpg>  
<https://www.dermis.net/bilder/CD178/550px/img0099.jpg>  
<https://www.dermis.net/bilder/CD003/550px/img0079.jpg>  
<https://www.dermis.net/bilder/CD181/550px/img0007.jpg>  
<https://www.dermis.net/bilder/CD181/550px/img0006.jpg>  
<https://www.dermis.net/bilder/CD041/550px/img0084.jpg>  
<https://www.dermis.net/bilder/CD194/550px/img0153.jpg>  
<https://www.dermis.net/bilder/CD196/550px/img0139.jpg>  
<https://www.dermis.net/bilder/CD196/550px/img0140.jpg>  
<https://www.dermis.net/bilder/CD197/550px/img0037.jpg>  
<https://www.dermis.net/bilder/CD198/550px/img0139.jpg>  
<https://www.dermis.net/bilder/CD036/550px/img0074.jpg>  
<https://www.dermis.net/bilder/CD212/550px/img0056.jpg>  
<https://www.dermis.net/bilder/CD210/550px/img0020.jpg>  
<https://www.dermis.net/bilder/CD035/550px/img0030.jpg>  
<https://www.dermis.net/bilder/CD035/550px/img0032.jpg>  
<https://www.dermis.net/bilder/CD016/550px/img0056.jpg>  
<https://www.dermis.net/bilder/CD027/550px/img0038.jpg>  
<https://www.dermis.net/bilder/CD027/550px/img0040.jpg>  
<https://www.dermis.net/bilder/CD180/550px/img0036.jpg>

<https://www.dermis.net/bilder/CD180/550px/img0035.jpg>  
<https://www.dermis.net/bilder/CD180/550px/img0037.jpg>  
<https://www.dermis.net/bilder/CD194/550px/img0041.jpg>  
<https://www.dermis.net/bilder/CD194/550px/img0042.jpg>  
<https://www.dermis.net/bilder/CD194/550px/img0043.jpg>  
<https://www.dermis.net/bilder/CD195/550px/img0094.jpg>  
<https://www.dermis.net/bilder/CD043/550px/img0040.jpg>  
<https://www.dermis.net/bilder/CD184/550px/img0087.jpg>  
<https://www.dermis.net/bilder/CD210/550px/img0152.jpg>  
<https://www.dermis.net/bilder/CD210/550px/img0153.jpg>  
<https://www.dermis.net/bilder/CD201/550px/img0012.jpg>  
<https://www.dermis.net/bilder/CD201/550px/img0013.jpg>  
<https://www.dermis.net/bilder/CD195/550px/img0030.jpg>  
<https://www.dermis.net/bilder/CD036/550px/img0051.jpg>  
<https://www.dermis.net/bilder/CD185/550px/img0068.jpg>  
<https://www.dermis.net/bilder/CD185/550px/img0069.jpg>  
<https://www.dermis.net/bilder/CD185/550px/img0072.jpg>  
<https://www.dermis.net/bilder/CD194/550px/img0046.jpg>  
<https://www.dermis.net/bilder/CD194/550px/img0047.jpg>  
<https://www.dermis.net/bilder/CD194/550px/img0048.jpg>  
<https://www.dermis.net/bilder/CD027/550px/img0027.jpg>  
<https://www.dermis.net/bilder/CD032/550px/img0042.jpg>  
<https://www.dermis.net/bilder/CD197/550px/img0027.jpg>  
<https://www.dermis.net/bilder/CD180/550px/img0032.jpg>  
<https://www.dermis.net/bilder/CD033/550px/img0017.jpg>  
<https://www.dermis.net/bilder/CD021/550px/img0060.jpg>  
<https://www.dermis.net/bilder/CD192/550px/img0097.jpg>  
<https://www.dermis.net/bilder/CD192/550px/img0096.jpg>  
<https://www.dermis.net/bilder/CD183/550px/img0009.jpg>  
<https://www.dermis.net/bilder/CD183/550px/img0010.jpg>  
<https://www.dermis.net/bilder/CD194/550px/img0089.jpg>  
<https://www.dermis.net/bilder/CD194/550px/img0090.jpg>  
<https://www.dermis.net/bilder/CD194/550px/img0091.jpg>  
<https://www.dermis.net/bilder/CD179/550px/img0014.jpg>  
<https://www.dermis.net/bilder/CD190/550px/img0024.jpg>  
<https://www.dermis.net/bilder/CD190/550px/img0026.jpg>  
<https://www.dermis.net/bilder/CD190/550px/img0027.jpg>  
<https://www.dermis.net/bilder/CD190/550px/img0008.jpg>  
<https://www.dermis.net/bilder/CD190/550px/img0009.jpg>  
<https://www.dermis.net/bilder/CD190/550px/img0010.jpg>  
<https://www.dermis.net/bilder/CD212/550px/img0067.jpg>  
<https://www.dermis.net/bilder/CD193/550px/img0174.jpg>  
<https://www.dermis.net/bilder/CD193/550px/img0175.jpg>  
<https://www.dermis.net/bilder/CD212/550px/img0007.jpg>  
<https://www.dermis.net/bilder/CD198/550px/img0174.jpg>  
<https://www.dermis.net/bilder/CD178/550px/img0034.jpg>  
<https://www.dermis.net/bilder/CD178/550px/img0035.jpg>  
<https://www.dermis.net/bilder/CD193/550px/img0051.jpg>

<https://www.dermis.net/bilder/CD201/550px/img0024.jpg>  
<https://www.dermis.net/bilder/CD199/550px/img0015.jpg>  
<https://www.dermis.net/bilder/CD199/550px/img0016.jpg>  
<https://www.dermis.net/bilder/CD193/550px/img0130.jpg>  
<https://www.dermis.net/bilder/CD005/550px/img0011.jpg>  
<https://www.dermis.net/bilder/CD033/550px/img0047.jpg>  
<https://www.dermis.net/bilder/CD035/550px/img0074.jpg>  
<https://www.dermis.net/bilder/CD042/550px/img0008.jpg>  
<https://www.dermis.net/bilder/CD042/550px/img0001.jpg>  
<https://www.dermis.net/bilder/CD042/550px/img0002.jpg>  
<https://www.dermis.net/bilder/CD021/550px/img0041.jpg>  
<https://www.dermis.net/bilder/CD193/550px/img0195.jpg>  
<https://www.dermis.net/bilder/CD194/550px/img0152.jpg>  
<https://www.dermis.net/bilder/CD194/550px/img0151.jpg>  
<https://www.dermis.net/bilder/CD012/550px/img0044.jpg>  
<https://www.dermis.net/bilder/CD187/550px/img0011.jpg>  
<https://www.dermis.net/bilder/CD187/550px/img0012.jpg>  
<https://www.dermis.net/bilder/CD196/550px/img0054.jpg>  
<https://www.dermis.net/bilder/CD196/550px/img0055.jpg>  
<https://www.dermis.net/bilder/CD196/550px/img0056.jpg>  
<https://www.dermis.net/bilder/CD196/550px/img0166.jpg>  
<https://www.dermis.net/bilder/CD198/550px/img0118.jpg>  
<https://www.dermis.net/bilder/CD183/550px/img0032.jpg>  
<https://www.dermis.net/bilder/CD183/550px/img0033.jpg>  
<https://www.dermis.net/bilder/CD193/550px/img0040.jpg>  
<https://www.dermis.net/bilder/CD193/550px/img0041.jpg>  
<https://www.dermis.net/bilder/CD193/550px/img0043.jpg>  
<https://www.dermis.net/bilder/CD021/550px/img0083.jpg>  
<https://www.dermis.net/bilder/CD195/550px/img0023.jpg>  
<https://www.dermis.net/bilder/CD193/550px/img0169.jpg>  
<https://www.dermis.net/bilder/CD193/550px/img0171.jpg>  
<https://www.dermis.net/bilder/CD201/550px/img0004.jpg>  
<https://www.dermis.net/bilder/CD188/550px/img0012.jpg>  
<https://www.dermis.net/bilder/CD194/550px/img0130.jpg>  
<https://www.dermis.net/bilder/CD195/550px/img0095.jpg>  
<https://www.dermis.net/bilder/CD210/550px/img0044.jpg>  
<https://www.dermis.net/bilder/CD051/550px/img0003.jpg>  
<https://www.dermis.net/bilder/CD194/550px/img0118.jpg>  
<https://www.dermis.net/bilder/CD192/550px/img0050.jpg>  
<https://www.dermis.net/bilder/CD043/550px/img0025.jpg>  
<https://www.dermis.net/bilder/CD195/550px/img0076.jpg>  
<https://www.dermis.net/bilder/CD195/550px/img0077.jpg>  
<https://www.dermis.net/bilder/CD195/550px/img0078.jpg>  
<https://www.dermis.net/bilder/CD195/550px/img0079.jpg>  
<https://www.dermis.net/bilder/CD199/550px/img0089.jpg>  
<https://www.dermis.net/bilder/CD041/550px/img0069.jpg>  
<https://www.dermis.net/bilder/CD003/550px/img0098.jpg>  
<https://www.dermis.net/bilder/CD042/550px/img0046.jpg>

<https://www.dermis.net/bilder/CD055/550px/img0021.jpg>  
<https://www.dermis.net/bilder/CD055/550px/img0022.jpg>  
<https://www.dermis.net/bilder/CD191/550px/img0034.jpg>  
<https://www.dermis.net/bilder/CD191/550px/img0035.jpg>  
<https://www.dermis.net/bilder/CD212/550px/img0120.jpg>  
<https://www.dermis.net/bilder/CD042/550px/img0015.jpg>  
<https://www.dermis.net/bilder/CD199/550px/img0062.jpg>  
<https://www.dermis.net/bilder/CD045/550px/img0050.jpg>  
<https://www.dermis.net/bilder/CD042/550px/img0047.jpg>  
<https://www.dermis.net/bilder/CD197/550px/img0015.jpg>  
<https://www.dermis.net/bilder/CD193/550px/img0061.jpg>  
<https://www.dermis.net/bilder/CD193/550px/img0062.jpg>  
<https://www.dermis.net/bilder/CD027/550px/img0030.jpg>  
<https://www.dermis.net/bilder/CD197/550px/img0025.jpg>  
<https://www.dermis.net/bilder/CD021/550px/img0064.jpg>  
<https://www.dermis.net/bilder/CD181/550px/img0046.jpg>  
<https://www.dermis.net/bilder/CD181/550px/img0047.jpg>  
<https://www.dermis.net/bilder/CD181/550px/img0048.jpg>  
<https://www.dermis.net/bilder/CD193/550px/img0181.jpg>  
<https://www.dermis.net/bilder/CD193/550px/img0180.jpg>  
<https://www.dermis.net/bilder/CD052/550px/img0052.jpg>  
<https://www.dermis.net/bilder/CD036/550px/img0079.jpg>  
<https://www.dermis.net/bilder/CD193/550px/img0088.jpg>  
<https://www.dermis.net/bilder/CD193/550px/img0089.jpg>  
<https://www.dermis.net/bilder/CD193/550px/img0090.jpg>  
<https://www.dermis.net/bilder/CD193/550px/img0092.jpg>  
<https://www.dermis.net/bilder/CD199/550px/img0107.jpg>  
<https://www.dermis.net/bilder/CD211/550px/img0016.jpg>  
<https://www.dermis.net/bilder/CD184/550px/img0023.jpg>  
<https://www.dermis.net/bilder/CD002/550px/img0097.jpg>  
<https://www.dermis.net/bilder/CD021/550px/img0004.jpg>  
<https://www.dermis.net/bilder/CD189/550px/img0065.jpg>  
<https://www.dermis.net/bilder/CD189/550px/img0068.jpg>  
<https://www.dermis.net/bilder/CD055/550px/img0040.jpg>  
<https://www.dermis.net/bilder/CD180/550px/img0018.jpg>  
<https://www.dermis.net/bilder/CD012/550px/img0066.jpg>  
<https://www.dermis.net/bilder/CD190/550px/img0035.jpg>  
<https://www.dermis.net/bilder/CD191/550px/img0009.jpg>  
<https://www.dermis.net/bilder/CD198/550px/img0135.jpg>  
<https://www.dermis.net/bilder/CD198/550px/img0136.jpg>  
<https://www.dermis.net/bilder/CD004/550px/img0072.jpg>  
<https://www.dermis.net/bilder/CD044/550px/img0084.jpg>  
<https://www.dermis.net/bilder/CD021/550px/img0080.jpg>  
<https://www.dermis.net/bilder/CD017/550px/img0093.jpg>  
<https://www.dermis.net/bilder/CD195/550px/img0088.jpg>  
<https://www.dermis.net/bilder/CD069/550px/img0104.jpg>  
<https://www.dermis.net/bilder/CD033/550px/img0018.jpg>  
<https://www.dermis.net/bilder/CD194/550px/img0087.jpg>

<https://www.dermis.net/bilder/CD194/550px/img0088.jpg>  
<https://www.dermis.net/bilder/CD188/550px/img0024.jpg>  
<https://www.dermis.net/bilder/CD191/550px/img0036.jpg>  
<https://www.dermis.net/bilder/CD191/550px/img0037.jpg>  
<https://www.dermis.net/bilder/CD196/550px/img0118.jpg>  
<https://www.dermis.net/bilder/CD189/550px/img0107.jpg>  
<https://www.dermis.net/bilder/CD189/550px/img0108.jpg>  
<https://www.dermis.net/bilder/CD189/550px/img0109.jpg>  
<https://www.dermis.net/bilder/CD033/550px/img0045.jpg>  
<https://www.dermis.net/bilder/CD184/550px/img0026.jpg>  
<https://www.dermis.net/bilder/CD039/550px/img0096.jpg>  
<https://www.dermis.net/bilder/CD182/550px/img0070.jpg>  
<https://www.dermis.net/bilder/CD182/550px/img0074.jpg>  
<https://www.dermis.net/bilder/CD182/550px/img0073.jpg>  
<https://www.dermis.net/bilder/CD182/550px/img0072.jpg>  
<https://www.dermis.net/bilder/CD182/550px/img0071.jpg>  
<https://www.dermis.net/bilder/CD182/550px/img0069.jpg>  
<https://www.dermis.net/bilder/CD043/550px/img0029.jpg>  
<https://www.dermis.net/bilder/CD043/550px/img0031.jpg>  
<https://www.dermis.net/bilder/CD192/550px/img0058.jpg>  
<https://www.dermis.net/bilder/CD040/550px/img0055.jpg>  
<https://www.dermis.net/bilder/CD193/550px/img0075.jpg>  
<https://www.dermis.net/bilder/CD194/550px/img0001.jpg>  
<https://www.dermis.net/bilder/CD194/550px/img0002.jpg>  
<https://www.dermis.net/bilder/CD180/550px/img0073.jpg>  
<https://www.dermis.net/bilder/CD180/550px/img0074.jpg>  
<https://www.dermis.net/bilder/CD004/550px/img0044.jpg>  
<https://www.dermis.net/bilder/CD021/550px/img0039.jpg>  
<https://www.dermis.net/bilder/CD192/550px/img0027.jpg>  
<https://www.dermis.net/bilder/CD192/550px/img0028.jpg>  
<https://www.dermis.net/bilder/CD212/550px/img0131.jpg>  
<https://www.dermis.net/bilder/CD189/550px/img0091.jpg>  
<https://www.dermis.net/bilder/CD027/550px/img0036.jpg>  
<https://www.dermis.net/bilder/CD027/550px/img0037.jpg>  
<https://www.dermis.net/bilder/CD013/550px/img0019.jpg>  
<https://www.dermis.net/bilder/CD179/550px/img0007.jpg>  
<https://www.dermis.net/bilder/CD179/550px/img0008.jpg>  
<https://www.dermis.net/bilder/CD193/550px/img0029.jpg>  
<https://www.dermis.net/bilder/CD042/550px/img0066.jpg>  
<https://www.dermis.net/bilder/CD184/550px/img0086.jpg>  
<https://www.dermis.net/bilder/CD184/550px/img0064.jpg>  
<https://www.dermis.net/bilder/CD180/550px/img0007.jpg>  
<https://www.dermis.net/bilder/CD199/550px/img0023.jpg>  
<https://www.dermis.net/bilder/CD195/550px/img0002.jpg>  
<https://www.dermis.net/bilder/CD195/550px/img0005.jpg>  
<https://www.dermis.net/bilder/CD198/550px/img0110.jpg>  
<https://www.dermis.net/bilder/CD212/550px/img0122.jpg>  
<https://www.dermis.net/bilder/CD024/550px/img0083.jpg>

<https://www.dermis.net/bilder/CD024/550px/img0084.jpg>  
<https://www.dermis.net/bilder/CD199/550px/img0096.jpg>  
<https://www.dermis.net/bilder/CD210/550px/img0027.jpg>  
<https://www.dermis.net/bilder/CD033/550px/img0035.jpg>  
<https://www.dermis.net/bilder/CD180/550px/img0033.jpg>  
<https://www.dermis.net/bilder/CD211/550px/img0002.jpg>  
<https://www.dermis.net/bilder/CD189/550px/img0060.jpg>  
<https://www.dermis.net/bilder/CD189/550px/img0062.jpg>  
<https://www.dermis.net/bilder/CD035/550px/img0071.jpg>  
<https://www.dermis.net/bilder/CD012/550px/img0093.jpg>  
<https://www.dermis.net/bilder/CD198/550px/img0168.jpg>  
<https://www.dermis.net/bilder/CD198/550px/img0170.jpg>  
<https://www.dermis.net/bilder/CD198/550px/img0171.jpg>  
<https://www.dermis.net/bilder/CD199/550px/img0069.jpg>  
<https://www.dermis.net/bilder/CD199/550px/img0070.jpg>  
<https://www.dermis.net/bilder/CD199/550px/img0074.jpg>  
<https://www.dermis.net/bilder/CD182/550px/img0066.jpg>  
<https://www.dermis.net/bilder/CD178/550px/img0033.jpg>  
<https://www.dermis.net/bilder/CD185/550px/img0050.jpg>  
<https://www.dermis.net/bilder/CD185/550px/img0051.jpg>  
<https://www.dermis.net/bilder/CD211/550px/img0062.jpg>  
<https://www.dermis.net/bilder/CD211/550px/img0042.jpg>  
<https://www.dermis.net/bilder/CD042/550px/img0058.jpg>  
<https://www.dermis.net/bilder/CD042/550px/img0059.jpg>  
<https://www.dermis.net/bilder/CD193/550px/img0044.jpg>  
<https://www.dermis.net/bilder/CD193/550px/img0045.jpg>  
<https://www.dermis.net/bilder/CD192/550px/img0074.jpg>  
<https://www.dermis.net/bilder/CD181/550px/img0084.jpg>  
<https://www.dermis.net/bilder/CD025/550px/img0025.jpg>  
<https://www.dermis.net/bilder/CD198/550px/img0184.jpg>  
<https://www.dermis.net/bilder/CD056/550px/img0092.jpg>  
<https://www.dermis.net/bilder/CD195/550px/img0020.jpg>  
<https://www.dermis.net/bilder/CD195/550px/img0021.jpg>  
<https://www.dermis.net/bilder/CD185/550px/img0042.jpg>  
<https://www.dermis.net/bilder/CD185/550px/img0043.jpg>  
<https://www.dermis.net/bilder/CD193/550px/img0146.jpg>  
<https://www.dermis.net/bilder/CD194/550px/img0117.jpg>  
<https://www.dermis.net/bilder/CD195/550px/img0114.jpg>  
<https://www.dermis.net/bilder/CD041/550px/img0071.jpg>  
<https://www.dermis.net/bilder/CD041/550px/img0081.jpg>  
<https://www.dermis.net/bilder/CD036/550px/img0034.jpg>  
<https://www.dermis.net/bilder/CD046/550px/img0045.jpg>  
<https://www.dermis.net/bilder/CD004/550px/img0029.jpg>  
<https://www.dermis.net/bilder/CD024/550px/img0033.jpg>  
<https://www.dermis.net/bilder/CD006/550px/img0030.jpg>  
<https://www.dermis.net/bilder/CD017/550px/img0094.jpg>  
<https://www.dermis.net/bilder/CD036/550px/img0004.jpg>  
<https://www.dermis.net/bilder/CD073/550px/img0002.jpg>



<https://www.dermis.net/bilder/CD211/550px/img0080.jpg>  
<https://www.dermis.net/bilder/CD002/550px/img0095.jpg>  
<https://www.dermis.net/bilder/CD012/550px/img0083.jpg>  
<https://www.dermis.net/bilder/CD034/550px/img0057.jpg>  
<https://www.dermis.net/bilder/CD034/550px/img0058.jpg>  
<https://www.dermis.net/bilder/CD028/550px/img0002.jpg>  
<https://www.dermis.net/bilder/CD014/550px/img0086.jpg>  
<https://www.dermis.net/bilder/CD041/550px/img0050.jpg>  
<https://www.dermis.net/bilder/CD016/550px/img0037.jpg>  
<https://www.dermis.net/bilder/CD003/550px/img0031.jpg>  
<https://www.dermis.net/bilder/CD069/550px/img0098.jpg>  
<https://www.dermis.net/bilder/CD016/550px/img0033.jpg>  
<https://www.dermis.net/bilder/CD025/550px/img0095.jpg>  
<https://www.dermis.net/bilder/CD018/550px/img0043.jpg>  
<https://www.dermis.net/bilder/CD018/550px/img0019.jpg>  
<https://www.dermis.net/bilder/CD054/550px/img0011.jpg>  
<https://www.dermis.net/bilder/CD016/550px/img0041.jpg>  
<https://www.dermis.net/bilder/CD014/550px/img0092.jpg>  
<https://www.dermis.net/bilder/CD054/550px/img0031.jpg>  
<https://www.dermis.net/bilder/CD016/550px/img0062.jpg>  
<https://www.dermis.net/bilder/CD034/550px/img0095.jpg>  
<https://www.dermis.net/bilder/CD055/550px/img0090.jpg>  
<https://www.dermis.net/bilder/CD055/550px/img0091.jpg>  
<https://www.dermis.net/bilder/CD023/550px/img0033.jpg>  
<https://www.dermis.net/bilder/CD027/550px/img0092.jpg>  
<https://www.dermis.net/bilder/CD018/550px/img0044.jpg>  
<https://www.dermis.net/bilder/CD023/550px/img0080.jpg>  
<https://www.dermis.net/bilder/CD046/550px/img0046.jpg>  
<https://www.dermis.net/bilder/CD039/550px/img0052.jpg>  
<https://www.dermis.net/bilder/CD026/550px/img0006.jpg>  
<https://www.dermis.net/bilder/CD023/550px/img0062.jpg>  
<https://www.dermis.net/bilder/CD023/550px/img0063.jpg>  
<https://www.dermis.net/bilder/CD033/550px/img0099.jpg>  
<https://www.dermis.net/bilder/CD033/550px/img0100.jpg>  
<https://www.dermis.net/bilder/CD036/550px/img0091.jpg>  
<https://www.dermis.net/bilder/CD052/550px/img0042.jpg>  
<https://www.dermis.net/bilder/CD003/550px/img0015.jpg>  
<https://www.dermis.net/bilder/CD025/550px/img0085.jpg>  
<https://www.dermis.net/bilder/CD037/550px/img0063.jpg>  
<https://www.dermis.net/bilder/CD037/550px/img0064.jpg>  
<https://www.dermis.net/bilder/CD014/550px/img0093.jpg>  
<https://www.dermis.net/bilder/CD051/550px/img0085.jpg>  
<https://www.dermis.net/bilder/CD018/550px/img0086.jpg>  
<https://www.dermis.net/bilder/CD040/550px/img0035.jpg>  
<https://www.dermis.net/bilder/CD052/550px/img0066.jpg>  
<https://www.dermis.net/bilder/CD055/550px/img0088.jpg>  
<https://www.dermis.net/bilder/CD052/550px/img0085.jpg>  
<https://www.dermis.net/bilder/CD015/550px/img0038.jpg>

<https://www.dermis.net/bilder/CD016/550px/img0040.jpg>  
<https://www.dermis.net/bilder/CD037/550px/img0050.jpg>  
<https://www.dermis.net/bilder/CD054/550px/img0107.jpg>  
<https://www.dermis.net/bilder/CD018/550px/img0056.jpg>  
<https://www.dermis.net/bilder/CD024/550px/img0099.jpg>  
<https://www.dermis.net/bilder/CD054/550px/img0093.jpg>  
<https://www.dermis.net/bilder/CD005/550px/img0043.jpg>  
<https://www.dermis.net/bilder/CD034/550px/img0030.jpg>  
<https://www.dermis.net/bilder/CD016/550px/img0044.jpg>  
<https://www.dermis.net/bilder/CD007/550px/img0056.jpg>  
<https://www.dermis.net/bilder/CD007/550px/img0021.jpg>  
<https://www.dermis.net/bilder/CD025/550px/img0090.jpg>  
<https://www.dermis.net/bilder/CD007/550px/img0020.jpg>  
<https://www.dermis.net/bilder/CD057/550px/img0014.jpg>  
<https://www.dermis.net/bilder/CD017/550px/img0080.jpg>  
<https://www.dermis.net/bilder/CD016/550px/img0036.jpg>  
<https://www.dermis.net/bilder/CD014/550px/img0053.jpg>  
<https://www.dermis.net/bilder/CD006/550px/img0025.jpg>  
<https://www.dermis.net/bilder/CD047/550px/img0016.jpg>  
<https://www.dermis.net/bilder/CD039/550px/img0021.jpg>  
<https://www.dermis.net/bilder/CD050/550px/img0004.jpg>  
<https://www.dermis.net/bilder/CD052/550px/img0082.jpg>  
<https://www.dermis.net/bilder/CD047/550px/img0081.jpg>  
<https://www.dermis.net/bilder/CD016/550px/img0038.jpg>  
<https://www.dermis.net/bilder/CD050/550px/img0086.jpg>  
<https://www.dermis.net/bilder/CD048/550px/img0013.jpg>  
<https://www.dermis.net/bilder/CD040/550px/img0089.jpg>  
<https://www.dermis.net/bilder/CD040/550px/img0090.jpg>  
<https://www.dermis.net/bilder/CD052/550px/img0081.jpg>  
<https://www.dermis.net/bilder/CD024/550px/img0056.jpg>  
<https://www.dermis.net/bilder/CD047/550px/img0007.jpg>  
<https://www.dermis.net/bilder/CD040/550px/img0078.jpg>  
<https://www.dermis.net/bilder/CD047/550px/img0014.jpg>  
<https://www.dermis.net/bilder/CD047/550px/img0015.jpg>  
<https://www.dermis.net/bilder/CD057/550px/img0004.jpg>  
<https://www.dermis.net/bilder/CD015/550px/img0035.jpg>  
<https://www.dermis.net/bilder/CD039/550px/img0056.jpg>  
<https://www.dermis.net/bilder/CD005/550px/img0094.jpg>  
<https://www.dermis.net/bilder/CD020/550px/img0048.jpg>  
<https://www.dermis.net/bilder/CD006/550px/img0095.jpg>  
<https://www.dermis.net/bilder/CD043/550px/img0042.jpg>  
<https://www.dermis.net/bilder/CD023/550px/img0011.jpg>  
<https://www.dermis.net/bilder/CD007/550px/img0013.jpg>  
<https://www.dermis.net/bilder/CD048/550px/img0044.jpg>  
<https://www.dermis.net/bilder/CD048/550px/img0045.jpg>  
<https://www.dermis.net/bilder/CD048/550px/img0046.jpg>  
<https://www.dermis.net/bilder/CD046/550px/img0059.jpg>  
<https://www.dermis.net/bilder/CD026/550px/img0073.jpg>

<https://www.dermis.net/bilder/CD026/550px/img0074.jpg>  
<https://www.dermis.net/bilder/CD025/550px/img0080.jpg>  
<https://www.dermis.net/bilder/CD006/550px/img0063.jpg>  
<https://www.dermis.net/bilder/CD052/550px/img0039.jpg>  
<https://www.dermis.net/bilder/CD052/550px/img0040.jpg>  
<https://www.dermis.net/bilder/CD016/550px/img0042.jpg>  
<https://www.dermis.net/bilder/CD178/550px/img0107.jpg>  
<https://www.dermis.net/bilder/CD178/550px/img0018.jpg>  
<https://www.dermis.net/bilder/CD056/550px/img0062.jpg>  
<https://www.dermis.net/bilder/CD181/550px/img0036.jpg>  
<https://www.dermis.net/bilder/CD196/550px/img0097.jpg>  
<https://www.dermis.net/bilder/CD196/550px/img0098.jpg>  
<https://www.dermis.net/bilder/CD199/550px/img0095.jpg>  
<https://www.dermis.net/bilder/CD212/550px/img0038.jpg>  
<https://www.dermis.net/bilder/CD212/550px/img0040.jpg>  
<https://www.dermis.net/bilder/CD193/550px/img0021.jpg>  
<https://www.dermis.net/bilder/CD035/550px/img0077.jpg>  
<https://www.dermis.net/bilder/CD036/550px/img0049.jpg>  
<https://www.dermis.net/bilder/CD189/550px/img0072.jpg>  
<https://www.dermis.net/bilder/CD189/550px/img0073.jpg>  
<https://www.dermis.net/bilder/CD184/550px/img0084.jpg>  
<https://www.dermis.net/bilder/CD036/550px/img0094.jpg>  
<https://www.dermis.net/bilder/CD195/550px/img0029.jpg>  
<https://www.dermis.net/bilder/CD021/550px/img0092.jpg>  
<https://www.dermis.net/bilder/CD024/550px/img0082.jpg>  
<https://www.dermis.net/bilder/CD007/550px/img0016.jpg>  
<https://www.dermis.net/bilder/CD189/550px/img0059.jpg>  
<https://www.dermis.net/bilder/CD190/550px/img0045.jpg>  
<https://www.dermis.net/bilder/CD190/550px/img0046.jpg>  
<https://www.dermis.net/bilder/CD194/550px/img0051.jpg>  
<https://www.dermis.net/bilder/CD216/550px/img0001.jpg>  
<https://www.dermis.net/bilder/CD007/550px/img0116.jpg>  
<https://www.dermis.net/bilder/CD035/550px/img0070.jpg>  
<https://www.dermis.net/bilder/CD192/550px/img0012.jpg>  
<https://www.dermis.net/bilder/CD210/550px/img0124.jpg>  
<https://www.dermis.net/bilder/CD211/550px/img0059.jpg>  
<https://www.dermis.net/bilder/CD212/550px/img0001.jpg>  
<https://www.dermis.net/bilder/CD036/550px/img0005.jpg>  
<https://www.dermis.net/bilder/CD056/550px/img0067.jpg>  
<https://www.dermis.net/bilder/CD180/550px/img0094.jpg>  
<https://www.dermis.net/bilder/CD012/550px/img0068.jpg>  
<https://www.dermis.net/bilder/CD199/550px/img0140.jpg>  
<https://www.dermis.net/bilder/CD033/550px/img0072.jpg>  
<https://www.dermis.net/bilder/CD033/550px/img0079.jpg>  
<https://www.dermis.net/bilder/CD033/550px/img0080.jpg>  
<https://www.dermis.net/bilder/CD199/550px/img0021.jpg>  
<https://www.dermis.net/bilder/CD013/550px/img0018.jpg>  
<https://www.dermis.net/bilder/CD018/550px/img0078.jpg>

<https://www.dermis.net/bilder/CD179/550px/img0001.jpg>  
<https://www.dermis.net/bilder/CD179/550px/img0002.jpg>  
<https://www.dermis.net/bilder/CD194/550px/img0131.jpg>  
<https://www.dermis.net/bilder/CD194/550px/img0132.jpg>  
<https://www.dermis.net/bilder/CD179/550px/img0025.jpg>  
<https://www.dermis.net/bilder/CD016/550px/img0039.jpg>  
<https://www.dermis.net/bilder/CD040/550px/img0093.jpg>  
<https://www.dermis.net/bilder/CD040/550px/img0094.jpg>  
<https://www.dermis.net/bilder/CD212/550px/img0069.jpg>  
<https://www.dermis.net/bilder/CD039/550px/img0095.jpg>  
<https://www.dermis.net/bilder/CD187/550px/img0036.jpg>  
<https://www.dermis.net/bilder/CD012/550px/img0072.jpg>  
<https://www.dermis.net/bilder/CD193/550px/img0094.jpg>  
<https://www.dermis.net/bilder/CD193/550px/img0095.jpg>  
<https://www.dermis.net/bilder/CD198/550px/img0083.jpg>  
<https://www.dermis.net/bilder/CD192/550px/img0032.jpg>  
<https://www.dermis.net/bilder/CD195/550px/img0068.jpg>  
<https://www.dermis.net/bilder/CD198/550px/img0091.jpg>  
<https://www.dermis.net/bilder/CD198/550px/img0092.jpg>  
<https://www.dermis.net/bilder/CD193/550px/img0105.jpg>  
<https://www.dermis.net/bilder/CD194/550px/img0061.jpg>  
<https://www.dermis.net/bilder/CD194/550px/img0062.jpg>  
<https://www.dermis.net/bilder/CD192/550px/img0011.jpg>  
<https://www.dermis.net/bilder/CD192/550px/img0019.jpg>  
<https://www.dermis.net/bilder/CD212/550px/img0075.jpg>  
<https://www.dermis.net/bilder/CD211/550px/img0030.jpg>  
<https://www.dermis.net/bilder/CD033/550px/img0043.jpg>  
<https://www.dermis.net/bilder/CD196/550px/img0087.jpg>  
<https://www.dermis.net/bilder/CD189/550px/img0077.jpg>  
<https://www.dermis.net/bilder/CD025/550px/img0020.jpg>  
<https://www.dermis.net/bilder/CD021/550px/img0056.jpg>  
<https://www.dermis.net/bilder/CD183/550px/img0003.jpg>  
<https://www.dermis.net/bilder/CD183/550px/img0004.jpg>  
<https://www.dermis.net/bilder/CD199/550px/img0028.jpg>  
<https://www.dermis.net/bilder/CD212/550px/img0071.jpg>  
<https://www.dermis.net/bilder/CD199/550px/img0026.jpg>  
<https://www.dermis.net/bilder/CD033/550px/img0013.jpg>  
<https://www.dermis.net/bilder/CD012/550px/img0069.jpg>  
<https://www.dermis.net/bilder/CD055/550px/img0047.jpg>  
<https://www.dermis.net/bilder/CD188/550px/img0022.jpg>  
<https://www.dermis.net/bilder/CD188/550px/img0023.jpg>  
<https://www.dermis.net/bilder/CD195/550px/img0074.jpg>  
<https://www.dermis.net/bilder/CD195/550px/img0075.jpg>  
<https://www.dermis.net/bilder/CD184/550px/img0047.jpg>  
<https://www.dermis.net/bilder/CD195/550px/img0019.jpg>  
<https://www.dermis.net/bilder/CD179/550px/img0003.jpg>  
<https://www.dermis.net/bilder/CD182/550px/img0032.jpg>  
<https://www.dermis.net/bilder/CD199/550px/img0065.jpg>

<https://www.dermis.net/bilder/CD191/550px/img0105.jpg>  
<https://www.dermis.net/bilder/CD178/550px/img0081.jpg>  
<https://www.dermis.net/bilder/CD178/550px/img0082.jpg>  
<https://www.dermis.net/bilder/CD012/550px/img0064.jpg>  
<https://www.dermis.net/bilder/CD192/550px/img0083.jpg>  
<https://www.dermis.net/bilder/CD056/550px/img0089.jpg>  
<https://www.dermis.net/bilder/CD056/550px/img0090.jpg>  
<https://www.dermis.net/bilder/CD201/550px/img0010.jpg>  
<https://www.dermis.net/bilder/CD192/550px/img0077.jpg>  
<https://www.dermis.net/bilder/CD180/550px/img0021.jpg>  
<https://www.dermis.net/bilder/CD180/550px/img0022.jpg>  
<https://www.dermis.net/bilder/CD186/550px/img0001.jpg>  
<https://www.dermis.net/bilder/CD185/550px/img0100.jpg>  
<https://www.dermis.net/bilder/CD186/550px/img0002.jpg>  
<https://www.dermis.net/bilder/CD196/550px/img0168.jpg>  
<https://www.dermis.net/bilder/CD192/550px/img0059.jpg>  
<https://www.dermis.net/bilder/CD198/550px/img0095.jpg>  
<https://www.dermis.net/bilder/CD184/550px/img0048.jpg>  
<https://www.dermis.net/bilder/CD192/550px/img0084.jpg>  
<https://www.dermis.net/bilder/CD033/550px/img0020.jpg>  
<https://www.dermis.net/bilder/CD195/550px/img0066.jpg>  
<https://www.dermis.net/bilder/CD195/550px/img0067.jpg>  
<https://www.dermis.net/bilder/CD021/550px/img0075.jpg>  
<https://www.dermis.net/bilder/CD012/550px/img0063.jpg>  
<https://www.dermis.net/bilder/CD029/550px/img0014.jpg>  
<https://www.dermis.net/bilder/CD033/550px/img0044.jpg>  
<https://www.dermis.net/bilder/CD210/550px/img0061.jpg>  
<https://www.dermis.net/bilder/CD210/550px/img0062.jpg>  
<https://www.dermis.net/bilder/CD025/550px/img0015.jpg>  
<https://www.dermis.net/bilder/CD194/550px/img0122.jpg>  
<https://www.dermis.net/bilder/CD199/550px/img0094.jpg>  
<https://www.dermis.net/bilder/CD212/550px/img0039.jpg>  
<https://www.dermis.net/bilder/CD195/550px/img0103.jpg>  
<https://www.dermis.net/bilder/CD013/550px/img0008.jpg>  
<https://www.dermis.net/bilder/CD028/550px/img0001.jpg>  
<https://www.dermis.net/bilder/CD001/550px/img0046.jpg>  
<https://www.dermis.net/bilder/CD178/550px/img0080.jpg>  
<https://www.dermis.net/bilder/CD041/550px/img0082.jpg>  
<https://www.dermis.net/bilder/CD040/550px/img0031.jpg>  
<https://www.dermis.net/bilder/CD071/550px/img0004.jpg>  
<https://www.dermis.net/bilder/CD028/550px/img0008.jpg>  
<https://www.dermis.net/bilder/CD069/550px/img0096.jpg>  
<https://www.dermis.net/bilder/CD193/550px/img0191.jpg>  
<https://www.dermis.net/bilder/CD193/550px/img0192.jpg>  
<https://www.dermis.net/bilder/CD006/550px/img0004.jpg>  
<https://www.dermis.net/bilder/CD006/550px/img0009.jpg>  
<https://www.dermis.net/bilder/CD054/550px/img0065.jpg>  
<https://www.dermis.net/bilder/CD073/550px/img0001.jpg>

<https://www.dermis.net/bilder/CD069/550px/img0001.jpg>  
<https://www.dermis.net/bilder/CD070/550px/img0061.jpg>  
<https://www.dermis.net/bilder/CD070/550px/img0062.jpg>  
<https://www.dermis.net/bilder/CD182/550px/img0039.jpg>  
<https://www.dermis.net/bilder/CD056/550px/img0054.jpg>  
<https://www.dermis.net/bilder/CD001/550px/img0079.jpg>  
<https://www.dermis.net/bilder/CD070/550px/img0008.jpg>  
<https://www.dermis.net/bilder/CD006/550px/img0058.jpg>  
<https://www.dermis.net/bilder/CD005/550px/img0019.jpg>  
<https://www.dermis.net/bilder/CD041/550px/img0053.jpg>  
<https://www.dermis.net/bilder/CD042/550px/img0042.jpg>  
<https://www.dermis.net/bilder/CD040/550px/img0077.jpg>  
<https://www.dermis.net/bilder/CD013/550px/img0027.jpg>  
<https://www.dermis.net/bilder/CD181/550px/img0081.jpg>  
<https://www.dermis.net/bilder/CD067/550px/img0035.jpg>  
<https://www.dermis.net/bilder/CD067/550px/img0036.jpg>  
<https://www.dermis.net/bilder/CD067/550px/img0037.jpg>  
<https://www.dermis.net/bilder/CD039/550px/img0028.jpg>  
<https://www.dermis.net/bilder/CD047/550px/img0098.jpg>  
<https://www.dermis.net/bilder/CD067/550px/img0033.jpg>  
<https://www.dermis.net/bilder/CD067/550px/img0034.jpg>  
<https://www.dermis.net/bilder/CD042/550px/img0080.jpg>  
<https://www.dermis.net/bilder/CD071/550px/img0001.jpg>  
<https://www.dermis.net/bilder/CD018/550px/img0022.jpg>  
<https://www.dermis.net/bilder/CD050/550px/img0089.jpg>  
<https://www.dermis.net/bilder/CD044/550px/img0087.jpg>  
<https://www.dermis.net/bilder/CD051/550px/img0052.jpg>  
<https://www.dermis.net/bilder/CD065/550px/img0026.jpg>  
<https://www.dermis.net/bilder/CD065/550px/img0027.jpg>  
<https://www.dermis.net/bilder/CD039/550px/img0024.jpg>  
<https://www.dermis.net/bilder/CD039/550px/img0025.jpg>  
<https://www.dermis.net/bilder/CD040/550px/img0013.jpg>  
<https://www.dermis.net/bilder/CD059/550px/img0057.jpg>  
<https://www.dermis.net/bilder/CD059/550px/img0058.jpg>  
<https://www.dermis.net/bilder/CD059/550px/img0059.jpg>  
<https://www.dermis.net/bilder/CD059/550px/img0060.jpg>  
<https://www.dermis.net/bilder/CD059/550px/img0061.jpg>  
<https://www.dermis.net/bilder/CD023/550px/img0065.jpg>  
<https://www.dermis.net/bilder/CD023/550px/img0066.jpg>  
<https://www.dermis.net/bilder/CD064/550px/img0056.jpg>  
<https://www.dermis.net/bilder/CD064/550px/img0057.jpg>  
<https://www.dermis.net/bilder/CD051/550px/img0018.jpg>  
<https://www.dermis.net/bilder/CD051/550px/img0019.jpg>  
<https://www.dermis.net/bilder/CD073/550px/img0012.jpg>  
<https://www.dermis.net/bilder/CD073/550px/img0013.jpg>  
<https://www.dermis.net/bilder/CD073/550px/img0014.jpg>  
<https://www.dermis.net/bilder/CD073/550px/img0015.jpg>  
<https://www.dermis.net/bilder/CD051/550px/img0055.jpg>

<https://www.dermis.net/bilder/CD014/550px/img0046.jpg>  
<https://www.dermis.net/bilder/CD073/550px/img0030.jpg>  
<https://www.dermis.net/bilder/CD073/550px/img0031.jpg>  
<https://www.dermis.net/bilder/CD073/550px/img0032.jpg>  
<https://www.dermis.net/bilder/CD039/550px/img0040.jpg>  
<https://www.dermis.net/bilder/CD051/550px/img0069.jpg>  
<https://www.dermis.net/bilder/CD064/550px/img0101.jpg>  
<https://www.dermis.net/bilder/CD064/550px/img0102.jpg>  
<https://www.dermis.net/bilder/CD067/550px/img0082.jpg>  
<https://www.dermis.net/bilder/CD067/550px/img0083.jpg>  
<https://www.dermis.net/bilder/CD056/550px/img0057.jpg>  
<https://www.dermis.net/bilder/CD005/550px/img0061.jpg>  
<https://www.dermis.net/bilder/CD071/550px/img0068.jpg>  
<https://www.dermis.net/bilder/CD067/550px/img0001.jpg>  
<https://www.dermis.net/bilder/CD067/550px/img0005.jpg>  
<https://www.dermis.net/bilder/CD048/550px/img0035.jpg>  
<https://www.dermis.net/bilder/CD067/550px/img0002.jpg>  
<https://www.dermis.net/bilder/CD067/550px/img0004.jpg>  
<https://www.dermis.net/bilder/CD064/550px/img0073.jpg>  
<https://www.dermis.net/bilder/CD064/550px/img0074.jpg>  
<https://www.dermis.net/bilder/CD064/550px/img0075.jpg>  
<https://www.dermis.net/bilder/CD064/550px/img0076.jpg>  
<https://www.dermis.net/bilder/CD043/550px/img0003.jpg>  
<https://www.dermis.net/bilder/CD018/550px/img0014.jpg>  
<https://www.dermis.net/bilder/CD064/550px/img0049.jpg>  
<https://www.dermis.net/bilder/CD064/550px/img0050.jpg>  
<https://www.dermis.net/bilder/CD064/550px/img0051.jpg>  
<https://www.dermis.net/bilder/CD064/550px/img0052.jpg>  
<https://www.dermis.net/bilder/CD064/550px/img0053.jpg>  
<https://www.dermis.net/bilder/CD064/550px/img0054.jpg>  
<https://www.dermis.net/bilder/CD064/550px/img0055.jpg>  
<https://www.dermis.net/bilder/CD026/550px/img0099.jpg>  
<https://www.dermis.net/bilder/CD066/550px/img0034.jpg>  
<https://www.dermis.net/bilder/CD066/550px/img0035.jpg>  
<https://www.dermis.net/bilder/CD066/550px/img0036.jpg>  
<https://www.dermis.net/bilder/CD066/550px/img0037.jpg>  
<https://www.dermis.net/bilder/CD005/550px/img0033.jpg>  
<https://www.dermis.net/bilder/CD050/550px/img0010.jpg>  
<https://www.dermis.net/bilder/CD050/550px/img0016.jpg>  
<https://www.dermis.net/bilder/CD050/550px/img0011.jpg>  
<https://www.dermis.net/bilder/CD050/550px/img0013.jpg>  
<https://www.dermis.net/bilder/CD050/550px/img0014.jpg>  
<https://www.dermis.net/bilder/CD050/550px/img0018.jpg>  
<https://www.dermis.net/bilder/CD067/550px/img0026.jpg>  
<https://www.dermis.net/bilder/CD067/550px/img0027.jpg>  
<https://www.dermis.net/bilder/CD067/550px/img0028.jpg>  
<https://www.dermis.net/bilder/CD004/550px/img0007.jpg>  
<https://www.dermis.net/bilder/CD067/550px/img0006.jpg>

<https://www.dermis.net/bilder/CD016/550px/img0046.jpg>  
<https://www.dermis.net/bilder/CD067/550px/img0007.jpg>  
<https://www.dermis.net/bilder/CD067/550px/img0009.jpg>  
<https://www.dermis.net/bilder/CD067/550px/img0010.jpg>  
<https://www.dermis.net/bilder/CD067/550px/img0011.jpg>  
<https://www.dermis.net/bilder/CD067/550px/img0012.jpg>  
<https://www.dermis.net/bilder/CD047/550px/img0048.jpg>  
<https://www.dermis.net/bilder/CD050/550px/img0062.jpg>  
<https://www.dermis.net/bilder/CD048/550px/img0052.jpg>  
<https://www.dermis.net/bilder/CD006/550px/img0070.jpg>  
<https://www.dermis.net/bilder/CD071/550px/img0010.jpg>  
<https://www.dermis.net/bilder/CD073/550px/img0016.jpg>  
<https://www.dermis.net/bilder/CD073/550px/img0017.jpg>  
<https://www.dermis.net/bilder/CD073/550px/img0018.jpg>  
<https://www.dermis.net/bilder/CD003/550px/img0004.jpg>  
<https://www.dermis.net/bilder/CD018/550px/img0062.jpg>  
<https://www.dermis.net/bilder/CD063/550px/img0085.jpg>  
<https://www.dermis.net/bilder/CD014/550px/img0066.jpg>  
<https://www.dermis.net/bilder/CD006/550px/img0069.jpg>  
<https://www.dermis.net/bilder/CD012/550px/img0091.jpg>  
<https://www.dermis.net/bilder/CD065/550px/img0094.jpg>  
<https://www.dermis.net/bilder/CD065/550px/img0096.jpg>  
<https://www.dermis.net/bilder/CD018/550px/img0068.jpg>  
<https://www.dermis.net/bilder/CD056/550px/img0016.jpg>  
<https://www.dermis.net/bilder/CD063/550px/img0001.jpg>  
<https://www.dermis.net/bilder/CD063/550px/img0002.jpg>  
<https://www.dermis.net/bilder/CD063/550px/img0005.jpg>  
<https://www.dermis.net/bilder/CD059/550px/img0045.jpg>  
<https://www.dermis.net/bilder/CD059/550px/img0046.jpg>  
<https://www.dermis.net/bilder/CD059/550px/img0047.jpg>  
<https://www.dermis.net/bilder/CD014/550px/img0045.jpg>  
<https://www.dermis.net/bilder/CD063/550px/img0003.jpg>  
<https://www.dermis.net/bilder/CD046/550px/img0017.jpg>  
<https://www.dermis.net/bilder/CD046/550px/img0018.jpg>  
<https://www.dermis.net/bilder/CD046/550px/img0024.jpg>  
<https://www.dermis.net/bilder/CD065/550px/img0024.jpg>  
<https://www.dermis.net/bilder/CD056/550px/img0045.jpg>  
<https://www.dermis.net/bilder/CD066/550px/img0097.jpg>  
<https://www.dermis.net/bilder/CD066/550px/img0098.jpg>  
<https://www.dermis.net/bilder/CD063/550px/img0091.jpg>  
<https://www.dermis.net/bilder/CD063/550px/img0092.jpg>  
<https://www.dermis.net/bilder/CD063/550px/img0080.jpg>  
<https://www.dermis.net/bilder/CD069/550px/img0085.jpg>  
<https://www.dermis.net/bilder/CD014/550px/img0042.jpg>  
<https://www.dermis.net/bilder/CD042/550px/img0027.jpg>  
<https://www.dermis.net/bilder/CD052/550px/img0057.jpg>  
<https://www.dermis.net/bilder/CD058/550px/img0026.jpg>  
<https://www.dermis.net/bilder/CD048/550px/img0063.jpg>



<https://www.dermis.net/bilder/CD048/550px/img0064.jpg>  
<https://www.dermis.net/bilder/CD058/550px/img0025.jpg>  
<https://www.dermis.net/bilder/CD054/550px/img0101.jpg>  
<https://www.dermis.net/bilder/CD054/550px/img0102.jpg>  
<https://www.dermis.net/bilder/CD049/550px/img0093.jpg>  
<https://www.dermis.net/bilder/CD003/550px/img0082.jpg>  
<https://www.dermis.net/bilder/CD003/550px/img0047.jpg>  
<https://www.dermis.net/bilder/CD048/550px/img0084.jpg>  
<https://www.dermis.net/bilder/CD026/550px/img0057.jpg>  
<https://www.dermis.net/bilder/CD008/550px/img0062.jpg>  
<https://www.dermis.net/bilder/CD058/550px/img0027.jpg>  
<https://www.dermis.net/bilder/CD042/550px/img0039.jpg>  
<https://www.dermis.net/bilder/CD052/550px/img0048.jpg>  
<https://www.dermis.net/bilder/CD023/550px/img0053.jpg>  
<https://www.dermis.net/bilder/CD023/550px/img0054.jpg>  
<https://www.dermis.net/bilder/CD056/550px/img0048.jpg>  
<https://www.dermis.net/bilder/CD048/550px/img0069.jpg>  
<https://www.dermis.net/bilder/CD006/550px/img0033.jpg>  
<https://www.dermis.net/bilder/CD006/550px/img0022.jpg>  
<https://www.dermis.net/bilder/CD044/550px/img0038.jpg>  
<https://www.dermis.net/bilder/CD036/550px/img0081.jpg>  
<https://www.dermis.net/bilder/CD050/550px/img0069.jpg>  
<https://www.dermis.net/bilder/CD036/550px/img0068.jpg>  
<https://www.dermis.net/bilder/CD059/550px/img0042.jpg>  
<https://www.dermis.net/bilder/CD059/550px/img0043.jpg>  
<https://www.dermis.net/bilder/CD059/550px/img0044.jpg>  
<https://www.dermis.net/bilder/CD005/550px/img0098.jpg>  
<https://www.dermis.net/bilder/CD014/550px/img0035.jpg>  
<https://www.dermis.net/bilder/CD003/550px/img0044.jpg>  
<https://www.dermis.net/bilder/CD059/550px/img0029.jpg>  
<https://www.dermis.net/bilder/CD059/550px/img0030.jpg>  
<https://www.dermis.net/bilder/CD023/550px/img0031.jpg>  
<https://www.dermis.net/bilder/CD058/550px/img0028.jpg>  
<https://www.dermis.net/bilder/CD004/550px/img0002.jpg>  
<https://www.dermis.net/bilder/CD018/550px/img0073.jpg>  
<https://www.dermis.net/bilder/CD014/550px/img0090.jpg>  
<https://www.dermis.net/bilder/CD039/550px/img0053.jpg>  
<https://www.dermis.net/bilder/CD026/550px/img0065.jpg>  
<https://www.dermis.net/bilder/CD026/550px/img0066.jpg>  
<https://www.dermis.net/bilder/CD044/550px/img0045.jpg>  
<https://www.dermis.net/bilder/CD066/550px/img0101.jpg>  
<https://www.dermis.net/bilder/CD066/550px/img0102.jpg>  
<https://www.dermis.net/bilder/CD063/550px/img0036.jpg>  
<https://www.dermis.net/bilder/CD063/550px/img0034.jpg>  
<https://www.dermis.net/bilder/CD063/550px/img0035.jpg>  
<https://www.dermis.net/bilder/CD025/550px/img0098.jpg>  
<https://www.dermis.net/bilder/CD025/550px/img0099.jpg>  
<https://www.dermis.net/bilder/CD067/550px/img0023.jpg>

<https://www.dermis.net/bilder/CD054/550px/img0096.jpg>  
<https://www.dermis.net/bilder/CD054/550px/img0098.jpg>  
<https://www.dermis.net/bilder/CD014/550px/img0007.jpg>  
<https://www.dermis.net/bilder/CD067/550px/img0065.jpg>  
<https://www.dermis.net/bilder/CD063/550px/img0009.jpg>  
<https://www.dermis.net/bilder/CD063/550px/img0011.jpg>  
<https://www.dermis.net/bilder/CD063/550px/img0012.jpg>  
<https://www.dermis.net/bilder/CD063/550px/img0010.jpg>  
<https://www.dermis.net/bilder/CD063/550px/img0054.jpg>  
<https://www.dermis.net/bilder/CD036/550px/img0092.jpg>  
<https://www.dermis.net/bilder/CD007/550px/img0003.jpg>  
<https://www.dermis.net/bilder/CD052/550px/img0095.jpg>  
<https://www.dermis.net/bilder/CD001/550px/img0102.jpg>  
<https://www.dermis.net/bilder/CD028/550px/img0026.jpg>  
<https://www.dermis.net/bilder/CD028/550px/img0027.jpg>  
<https://www.dermis.net/bilder/CD028/550px/img0029.jpg>  
<https://www.dermis.net/bilder/CD028/550px/img0030.jpg>  
<https://www.dermis.net/bilder/CD028/550px/img0032.jpg>  
<https://www.dermis.net/bilder/CD028/550px/img0036.jpg>  
<https://www.dermis.net/bilder/CD027/550px/img0041.jpg>  
<https://www.dermis.net/bilder/CD027/550px/img0045.jpg>  
<https://www.dermis.net/bilder/CD054/550px/img0095.jpg>  
<https://www.dermis.net/bilder/CD003/550px/img0017.jpg>  
<https://www.dermis.net/bilder/CD064/550px/img0094.jpg>  
<https://www.dermis.net/bilder/CD064/550px/img0095.jpg>  
<https://www.dermis.net/bilder/CD064/550px/img0096.jpg>  
<https://www.dermis.net/bilder/CD059/550px/img0037.jpg>  
<https://www.dermis.net/bilder/CD067/550px/img0020.jpg>  
<https://www.dermis.net/bilder/CD016/550px/img0011.jpg>  
<https://www.dermis.net/bilder/CD067/550px/img0018.jpg>  
<https://www.dermis.net/bilder/CD067/550px/img0019.jpg>  
<https://www.dermis.net/bilder/CD067/550px/img0021.jpg>  
<https://www.dermis.net/bilder/CD067/550px/img0022.jpg>  
<https://www.dermis.net/bilder/CD023/550px/img0002.jpg>  
<https://www.dermis.net/bilder/CD023/550px/img0004.jpg>  
<https://www.dermis.net/bilder/CD023/550px/img0058.jpg>  
<https://www.dermis.net/bilder/CD058/550px/img0006.jpg>  
<https://www.dermis.net/bilder/CD058/550px/img0001.jpg>  
<https://www.dermis.net/bilder/CD058/550px/img0002.jpg>  
<https://www.dermis.net/bilder/CD058/550px/img0035.jpg>  
<https://www.dermis.net/bilder/CD058/550px/img0099.jpg>  
<https://www.dermis.net/bilder/CD049/550px/img0007.jpg>  
<https://www.dermis.net/bilder/CD049/550px/img0008.jpg>  
<https://www.dermis.net/bilder/CD049/550px/img0009.jpg>  
<https://www.dermis.net/bilder/CD049/550px/img0010.jpg>  
<https://www.dermis.net/bilder/CD049/550px/img0013.jpg>  
<https://www.dermis.net/bilder/CD049/550px/img0014.jpg>  
<https://www.dermis.net/bilder/CD049/550px/img0015.jpg>

<https://www.dermis.net/bilder/CD049/550px/img0017.jpg>  
<https://www.dermis.net/bilder/CD049/550px/img0018.jpg>  
<https://www.dermis.net/bilder/CD049/550px/img0019.jpg>  
<https://www.dermis.net/bilder/CD060/550px/img0021.jpg>  
<https://www.dermis.net/bilder/CD060/550px/img0020.jpg>  
<https://www.dermis.net/bilder/CD020/550px/img0068.jpg>  
<https://www.dermis.net/bilder/CD018/550px/img0083.jpg>  
<https://www.dermis.net/bilder/CD057/550px/img0048.jpg>  
<https://www.dermis.net/bilder/CD055/550px/img0086.jpg>  
<https://www.dermis.net/bilder/CD060/550px/img0093.jpg>  
<https://www.dermis.net/bilder/CD060/550px/img0094.jpg>  
<https://www.dermis.net/bilder/CD060/550px/img0095.jpg>  
<https://www.dermis.net/bilder/CD042/550px/img0074.jpg>  
<https://www.dermis.net/bilder/CD042/550px/img0075.jpg>  
<https://www.dermis.net/bilder/CD036/550px/img0061.jpg>  
<https://www.dermis.net/bilder/CD049/550px/img0029.jpg>  
<https://www.dermis.net/bilder/CD032/550px/img0063.jpg>  
<https://www.dermis.net/bilder/CD032/550px/img0064.jpg>  
<https://www.dermis.net/bilder/CD003/550px/img0089.jpg>  
<https://www.dermis.net/bilder/CD067/550px/img0072.jpg>  
<https://www.dermis.net/bilder/CD065/550px/img0088.jpg>  
<https://www.dermis.net/bilder/CD065/550px/img0090.jpg>  
<https://www.dermis.net/bilder/CD065/550px/img0091.jpg>  
<https://www.dermis.net/bilder/CD065/550px/img0093.jpg>  
<https://www.dermis.net/bilder/CD051/550px/img0086.jpg>  
<https://www.dermis.net/bilder/CD060/550px/img0097.jpg>  
<https://www.dermis.net/bilder/CD060/550px/img0099.jpg>  
<https://www.dermis.net/bilder/CD060/550px/img0100.jpg>  
<https://www.dermis.net/bilder/CD060/550px/img0101.jpg>  
<https://www.dermis.net/bilder/CD060/550px/img0102.jpg>  
<https://www.dermis.net/bilder/CD059/550px/img0025.jpg>  
<https://www.dermis.net/bilder/CD059/550px/img0026.jpg>  
<https://www.dermis.net/bilder/CD058/550px/img0009.jpg>  
<https://www.dermis.net/bilder/CD058/550px/img0016.jpg>  
<https://www.dermis.net/bilder/CD058/550px/img0014.jpg>  
<https://www.dermis.net/bilder/CD058/550px/img0019.jpg>  
<https://www.dermis.net/bilder/CD067/550px/img0042.jpg>  
<https://www.dermis.net/bilder/CD067/550px/img0043.jpg>  
<https://www.dermis.net/bilder/CD067/550px/img0044.jpg>  
<https://www.dermis.net/bilder/CD067/550px/img0045.jpg>  
<https://www.dermis.net/bilder/CD020/550px/img0092.jpg>  
<https://www.dermis.net/bilder/CD049/550px/img0001.jpg>  
<https://www.dermis.net/bilder/CD049/550px/img0002.jpg>  
<https://www.dermis.net/bilder/CD049/550px/img0003.jpg>  
<https://www.dermis.net/bilder/CD049/550px/img0004.jpg>  
<https://www.dermis.net/bilder/CD049/550px/img0005.jpg>  
<https://www.dermis.net/bilder/CD049/550px/img0006.jpg>  
<https://www.dermis.net/bilder/CD007/550px/img0015.jpg>

<https://www.dermis.net/bilder/CD049/550px/img0062.jpg>  
<https://www.dermis.net/bilder/CD049/550px/img0063.jpg>  
<https://www.dermis.net/bilder/CD065/550px/img0100.jpg>  
<https://www.dermis.net/bilder/CD060/550px/img0074.jpg>  
<https://www.dermis.net/bilder/CD060/550px/img0075.jpg>  
<https://www.dermis.net/bilder/CD020/550px/img0011.jpg>  
<https://www.dermis.net/bilder/CD048/550px/img0061.jpg>  
<https://www.dermis.net/bilder/CD048/550px/img0062.jpg>  
<https://www.dermis.net/bilder/CD067/550px/img0093.jpg>  
<https://www.dermis.net/bilder/CD067/550px/img0094.jpg>  
<https://www.dermis.net/bilder/CD018/550px/img0096.jpg>  
<https://www.dermis.net/bilder/CD052/550px/img0065.jpg>  
<https://www.dermis.net/bilder/CD055/550px/img0087.jpg>  
<https://www.dermis.net/bilder/CD046/550px/img0053.jpg>  
<https://www.dermis.net/bilder/CD029/550px/img0019.jpg>  
<https://www.dermis.net/bilder/CD049/550px/img0050.jpg>  
<https://www.dermis.net/bilder/CD065/550px/img0056.jpg>  
<https://www.dermis.net/bilder/CD063/550px/img0029.jpg>  
<https://www.dermis.net/bilder/CD049/550px/img0083.jpg>  
<https://www.dermis.net/bilder/CD024/550px/img0019.jpg>  
<https://www.dermis.net/bilder/CD035/550px/img0023.jpg>  
<https://www.dermis.net/bilder/CD035/550px/img0024.jpg>  
<https://www.dermis.net/bilder/CD014/550px/img0003.jpg>  
<https://www.dermis.net/bilder/CD024/550px/img0094.jpg>  
<https://www.dermis.net/bilder/CD049/550px/img0079.jpg>  
<https://www.dermis.net/bilder/CD065/550px/img0010.jpg>  
<https://www.dermis.net/bilder/CD058/550px/img0077.jpg>  
<https://www.dermis.net/bilder/CD058/550px/img0084.jpg>  
<https://www.dermis.net/bilder/CD154/550px/img0088.jpg>  
<https://www.dermis.net/bilder/CD154/550px/img0089.jpg>  
<https://www.dermis.net/bilder/CD063/550px/img0065.jpg>  
<https://www.dermis.net/bilder/CD026/550px/img0033.jpg>  
<https://www.dermis.net/bilder/CD026/550px/img0036.jpg>  
<https://www.dermis.net/bilder/CD026/550px/img0037.jpg>  
<https://www.dermis.net/bilder/CD042/550px/img0043.jpg>  
<https://www.dermis.net/bilder/CD036/550px/img0020.jpg>  
<https://www.dermis.net/bilder/CD065/550px/img0074.jpg>  
<https://www.dermis.net/bilder/CD065/550px/img0075.jpg>  
<https://www.dermis.net/bilder/CD036/550px/img0026.jpg>  
<https://www.dermis.net/bilder/CD060/550px/img0002.jpg>  
<https://www.dermis.net/bilder/CD066/550px/img0064.jpg>  
<https://www.dermis.net/bilder/CD066/550px/img0065.jpg>  
<https://www.dermis.net/bilder/CD066/550px/img0066.jpg>  
<https://www.dermis.net/bilder/CD066/550px/img0067.jpg>  
<https://www.dermis.net/bilder/CD058/550px/img0065.jpg>  
<https://www.dermis.net/bilder/CD058/550px/img0069.jpg>  
<https://www.dermis.net/bilder/CD058/550px/img0070.jpg>  
<https://www.dermis.net/bilder/CD058/550px/img0071.jpg>

<https://www.dermis.net/bilder/CD058/550px/img0072.jpg>  
<https://www.dermis.net/bilder/CD060/550px/img0001.jpg>  
<https://www.dermis.net/bilder/CD047/550px/img0025.jpg>  
<https://www.dermis.net/bilder/CD044/550px/img0022.jpg>  
<https://www.dermis.net/bilder/CD015/550px/img0041.jpg>  
<https://www.dermis.net/bilder/CD059/550px/img0071.jpg>  
<https://www.dermis.net/bilder/CD059/550px/img0072.jpg>  
<https://www.dermis.net/bilder/CD037/550px/img0001.jpg>  
<https://www.dermis.net/bilder/CD063/550px/img0084.jpg>  
<https://www.dermis.net/bilder/CD056/550px/img0008.jpg>  
<https://www.dermis.net/bilder/CD057/550px/img0024.jpg>  
<https://www.dermis.net/bilder/CD040/550px/img0008.jpg>  
<https://www.dermis.net/bilder/CD027/550px/img0077.jpg>  
<https://www.dermis.net/bilder/CD057/550px/img0064.jpg>  
<https://www.dermis.net/bilder/CD024/550px/img0098.jpg>  
<https://www.dermis.net/bilder/CD014/550px/img0023.jpg>  
<https://www.dermis.net/bilder/CD067/550px/img0024.jpg>  
<https://www.dermis.net/bilder/CD026/550px/img0076.jpg>  
<https://www.dermis.net/bilder/CD058/550px/img0100.jpg>  
<https://www.dermis.net/bilder/CD066/550px/img0090.jpg>  
<https://www.dermis.net/bilder/CD066/550px/img0091.jpg>  
<https://www.dermis.net/bilder/CD058/550px/img0041.jpg>  
<https://www.dermis.net/bilder/CD058/550px/img0047.jpg>  
<https://www.dermis.net/bilder/CD058/550px/img0048.jpg>  
<https://www.dermis.net/bilder/CD014/550px/img0033.jpg>  
<https://www.dermis.net/bilder/CD058/550px/img0045.jpg>  
<https://www.dermis.net/bilder/CD004/550px/img0080.jpg>  
<https://www.dermis.net/bilder/CD018/550px/img0091.jpg>  
<https://www.dermis.net/bilder/CD039/550px/img0081.jpg>  
<https://www.dermis.net/bilder/CD039/550px/img0083.jpg>  
<https://www.dermis.net/bilder/CD042/550px/img0055.jpg>  
<https://www.dermis.net/bilder/CD042/550px/img0056.jpg>  
<https://www.dermis.net/bilder/CD042/550px/img0057.jpg>  
<https://www.dermis.net/bilder/CD058/550px/img0021.jpg>  
<https://www.dermis.net/bilder/CD058/550px/img0046.jpg>  
<https://www.dermis.net/bilder/CD064/550px/img0066.jpg>  
<https://www.dermis.net/bilder/CD064/550px/img0068.jpg>  
<https://www.dermis.net/bilder/CD061/550px/img0009.jpg>  
<https://www.dermis.net/bilder/CD061/550px/img0010.jpg>  
<https://www.dermis.net/bilder/CD063/550px/img0030.jpg>  
<https://www.dermis.net/bilder/CD063/550px/img0031.jpg>  
<https://www.dermis.net/bilder/CD018/550px/img0018.jpg>  
<https://www.dermis.net/bilder/CD057/550px/img0035.jpg>  
<https://www.dermis.net/bilder/CD067/550px/img0100.jpg>  
<https://www.dermis.net/bilder/CD033/550px/img0090.jpg>  
<https://www.dermis.net/bilder/CD058/550px/img0064.jpg>  
<https://www.dermis.net/bilder/CD047/550px/img0053.jpg>  
<https://www.dermis.net/bilder/CD047/550px/img0056.jpg>

<https://www.dermis.net/bilder/CD063/550px/img0078.jpg>  
<https://www.dermis.net/bilder/CD063/550px/img0070.jpg>  
<https://www.dermis.net/bilder/CD063/550px/img0071.jpg>  
<https://www.dermis.net/bilder/CD032/550px/img0061.jpg>  
<https://www.dermis.net/bilder/CD052/550px/img0036.jpg>  
<https://www.dermis.net/bilder/CD035/550px/img0092.jpg>  
<https://www.dermis.net/bilder/CD064/550px/img0012.jpg>  
<https://www.dermis.net/bilder/CD064/550px/img0013.jpg>  
<https://www.dermis.net/bilder/CD064/550px/img0014.jpg>  
<https://www.dermis.net/bilder/CD040/550px/img0051.jpg>  
<https://www.dermis.net/bilder/CD064/550px/img0015.jpg>  
<https://www.dermis.net/bilder/CD064/550px/img0016.jpg>  
<https://www.dermis.net/bilder/CD064/550px/img0018.jpg>  
<https://www.dermis.net/bilder/CD064/550px/img0019.jpg>  
<https://www.dermis.net/bilder/CD064/550px/img0020.jpg>  
<https://www.dermis.net/bilder/CD064/550px/img0021.jpg>  
<https://www.dermis.net/bilder/CD067/550px/img0084.jpg>  
<https://www.dermis.net/bilder/CD067/550px/img0085.jpg>  
<https://www.dermis.net/bilder/CD065/550px/img0017.jpg>  
<https://www.dermis.net/bilder/CD023/550px/img0039.jpg>  
<https://www.dermis.net/bilder/CD047/550px/img0046.jpg>  
<https://www.dermis.net/bilder/CD025/550px/img0029.jpg>  
<https://www.dermis.net/bilder/CD065/550px/img0106.jpg>  
<https://www.dermis.net/bilder/CD064/550px/img0089.jpg>  
<https://www.dermis.net/bilder/CD064/550px/img0090.jpg>  
<https://www.dermis.net/bilder/CD064/550px/img0091.jpg>  
<https://www.dermis.net/bilder/CD064/550px/img0092.jpg>  
<https://www.dermis.net/bilder/CD007/550px/img0041.jpg>  
<https://www.dermis.net/bilder/CD037/550px/img0053.jpg>  
<https://www.dermis.net/bilder/CD027/550px/img0067.jpg>  
<https://www.dermis.net/bilder/CD027/550px/img0068.jpg>  
<https://www.dermis.net/bilder/CD054/550px/img0055.jpg>  
<https://www.dermis.net/bilder/CD064/550px/img0083.jpg>  
<https://www.dermis.net/bilder/CD064/550px/img0084.jpg>  
<https://www.dermis.net/bilder/CD064/550px/img0085.jpg>  
<https://www.dermis.net/bilder/CD064/550px/img0086.jpg>  
<https://www.dermis.net/bilder/CD064/550px/img0087.jpg>  
<https://www.dermis.net/bilder/CD064/550px/img0088.jpg>  
<https://www.dermis.net/bilder/CD059/550px/img0020.jpg>  
<https://www.dermis.net/bilder/CD059/550px/img0021.jpg>  
<https://www.dermis.net/bilder/CD059/550px/img0022.jpg>  
<https://www.dermis.net/bilder/CD059/550px/img0023.jpg>  
<https://www.dermis.net/bilder/CD063/550px/img0038.jpg>  
<https://www.dermis.net/bilder/CD063/550px/img0039.jpg>  
<https://www.dermis.net/bilder/CD063/550px/img0040.jpg>  
<https://www.dermis.net/bilder/CD046/550px/img0085.jpg>  
<https://www.dermis.net/bilder/CD046/550px/img0086.jpg>  
<https://www.dermis.net/bilder/CD065/550px/img0030.jpg>

<https://www.dermis.net/bilder/CD065/550px/img0032.jpg>  
<https://www.dermis.net/bilder/CD065/550px/img0033.jpg>  
<https://www.dermis.net/bilder/CD050/550px/img0023.jpg>  
<https://www.dermis.net/bilder/CD050/550px/img0024.jpg>  
<https://www.dermis.net/bilder/CD047/550px/img0010.jpg>  
<https://www.dermis.net/bilder/CD033/550px/img0075.jpg>  
<https://www.dermis.net/bilder/CD066/550px/img0073.jpg>  
<https://www.dermis.net/bilder/CD066/550px/img0074.jpg>  
<https://www.dermis.net/bilder/CD066/550px/img0075.jpg>  
<https://www.dermis.net/bilder/CD018/550px/img0009.jpg>  
<https://www.dermis.net/bilder/CD067/550px/img0103.jpg>  
<https://www.dermis.net/bilder/CD027/550px/img0012.jpg>  
<https://www.dermis.net/bilder/CD027/550px/img0011.jpg>  
<https://www.dermis.net/bilder/CD050/550px/img0046.jpg>  
<https://www.dermis.net/bilder/CD050/550px/img0047.jpg>  
<https://www.dermis.net/bilder/CD039/550px/img0002.jpg>  
<https://www.dermis.net/bilder/CD054/550px/img0073.jpg>  
<https://www.dermis.net/bilder/CD058/550px/img0052.jpg>  
<https://www.dermis.net/bilder/CD060/550px/img0069.jpg>  
<https://www.dermis.net/bilder/CD064/550px/img0105.jpg>  
<https://www.dermis.net/bilder/CD064/550px/img0106.jpg>  
<https://www.dermis.net/bilder/CD005/550px/img0015.jpg>  
<https://www.dermis.net/bilder/CD004/550px/img0076.jpg>  
<https://www.dermis.net/bilder/CD063/550px/img0049.jpg>  
<https://www.dermis.net/bilder/CD063/550px/img0050.jpg>  
<https://www.dermis.net/bilder/CD063/550px/img0051.jpg>  
<https://www.dermis.net/bilder/CD067/550px/img0108.jpg>  
<https://www.dermis.net/bilder/CD051/550px/img0020.jpg>  
<https://www.dermis.net/bilder/CD039/550px/img0057.jpg>  
<https://www.dermis.net/bilder/CD064/550px/img0079.jpg>  
<https://www.dermis.net/bilder/CD064/550px/img0082.jpg>  
<https://www.dermis.net/bilder/CD066/550px/img0104.jpg>  
<https://www.dermis.net/bilder/CD057/550px/img0042.jpg>  
<https://www.dermis.net/bilder/CD052/550px/img0035.jpg>  
<https://www.dermis.net/bilder/CD065/550px/img0084.jpg>  
<https://www.dermis.net/bilder/CD065/550px/img0085.jpg>  
<https://www.dermis.net/bilder/CD065/550px/img0086.jpg>  
<https://www.dermis.net/bilder/CD066/550px/img0024.jpg>  
<https://www.dermis.net/bilder/CD066/550px/img0023.jpg>  
<https://www.dermis.net/bilder/CD044/550px/img0031.jpg>  
<https://www.dermis.net/bilder/CD057/550px/img0043.jpg>  
<https://www.dermis.net/bilder/CD057/550px/img0044.jpg>  
<https://www.dermis.net/bilder/CD048/550px/img0057.jpg>  
<https://www.dermis.net/bilder/CD059/550px/img0031.jpg>  
<https://www.dermis.net/bilder/CD059/550px/img0032.jpg>  
<https://www.dermis.net/bilder/CD063/550px/img0024.jpg>  
<https://www.dermis.net/bilder/CD065/550px/img0098.jpg>  
<https://www.dermis.net/bilder/CD025/550px/img0083.jpg>

<https://www.dermis.net/bilder/CD025/550px/img0084.jpg>  
<https://www.dermis.net/bilder/CD047/550px/img0034.jpg>  
<https://www.dermis.net/bilder/CD047/550px/img0035.jpg>  
<https://www.dermis.net/bilder/CD047/550px/img0036.jpg>  
<https://www.dermis.net/bilder/CD047/550px/img0037.jpg>  
<https://www.dermis.net/bilder/CD065/550px/img0061.jpg>  
<https://www.dermis.net/bilder/CD007/550px/img0032.jpg>  
<https://www.dermis.net/bilder/CD033/550px/img0088.jpg>  
<https://www.dermis.net/bilder/CD063/550px/img0055.jpg>  
<https://www.dermis.net/bilder/CD063/550px/img0056.jpg>  
<https://www.dermis.net/bilder/CD049/550px/img0087.jpg>  
<https://www.dermis.net/bilder/CD049/550px/img0094.jpg>  
<https://www.dermis.net/bilder/CD049/550px/img0095.jpg>  
<https://www.dermis.net/bilder/CD063/550px/img0044.jpg>  
<https://www.dermis.net/bilder/CD063/550px/img0045.jpg>  
<https://www.dermis.net/bilder/CD063/550px/img0046.jpg>  
<https://www.dermis.net/bilder/CD007/550px/img0001.jpg>  
<https://www.dermis.net/bilder/CD025/550px/img0035.jpg>  
<https://www.dermis.net/bilder/CD034/550px/img0009.jpg>  
<https://www.dermis.net/bilder/CD024/550px/img0062.jpg>  
<https://www.dermis.net/bilder/CD024/550px/img0063.jpg>  
<https://www.dermis.net/bilder/CD024/550px/img0064.jpg>  
<https://www.dermis.net/bilder/CD024/550px/img0067.jpg>  
<https://www.dermis.net/bilder/CD024/550px/img0072.jpg>  
<https://www.dermis.net/bilder/CD060/550px/img0048.jpg>  
<https://www.dermis.net/bilder/CD043/550px/img0048.jpg>  
<https://www.dermis.net/bilder/CD048/550px/img0079.jpg>  
<https://www.dermis.net/bilder/CD027/550px/img0071.jpg>  
<https://www.dermis.net/bilder/CD067/550px/img0090.jpg>  
<https://www.dermis.net/bilder/CD051/550px/img0063.jpg>  
<https://www.dermis.net/bilder/CD056/550px/img0034.jpg>  
<https://www.dermis.net/bilder/CD004/550px/img0096.jpg>  
<https://www.dermis.net/bilder/CD064/550px/img0097.jpg>  
<https://www.dermis.net/bilder/CD064/550px/img0098.jpg>  
<https://www.dermis.net/bilder/CD065/550px/img0052.jpg>  
<https://www.dermis.net/bilder/CD067/550px/img0059.jpg>  
<https://www.dermis.net/bilder/CD024/550px/img0049.jpg>  
<https://www.dermis.net/bilder/CD064/550px/img0004.jpg>  
<https://www.dermis.net/bilder/CD064/550px/img0005.jpg>  
<https://www.dermis.net/bilder/CD064/550px/img0006.jpg>  
<https://www.dermis.net/bilder/CD064/550px/img0007.jpg>  
<https://www.dermis.net/bilder/CD064/550px/img0008.jpg>  
<https://www.dermis.net/bilder/CD064/550px/img0009.jpg>  
<https://www.dermis.net/bilder/CD064/550px/img0010.jpg>  
<https://www.dermis.net/bilder/CD024/550px/img0025.jpg>  
<https://www.dermis.net/bilder/CD024/550px/img0026.jpg>  
<https://www.dermis.net/bilder/CD024/550px/img0027.jpg>  
<https://www.dermis.net/bilder/CD040/550px/img0009.jpg>



<https://www.dermis.net/bilder/CD036/550px/img0096.jpg>  
<https://www.dermis.net/bilder/CD047/550px/img0079.jpg>  
<https://www.dermis.net/bilder/CD047/550px/img0080.jpg>  
<https://www.dermis.net/bilder/CD002/550px/img0074.jpg>  
<https://www.dermis.net/bilder/CD047/550px/img0082.jpg>  
<https://www.dermis.net/bilder/CD047/550px/img0083.jpg>  
<https://www.dermis.net/bilder/CD026/550px/img0086.jpg>  
<https://www.dermis.net/bilder/CD067/550px/img0057.jpg>  
<https://www.dermis.net/bilder/CD067/550px/img0058.jpg>  
<https://www.dermis.net/bilder/CD024/550px/img0050.jpg>  
<https://www.dermis.net/bilder/CD007/550px/img0033.jpg>  
<https://www.dermis.net/bilder/CD065/550px/img0104.jpg>  
<https://www.dermis.net/bilder/CD014/550px/img0010.jpg>  
<https://www.dermis.net/bilder/CD059/550px/img0001.jpg>  
<https://www.dermis.net/bilder/CD059/550px/img0002.jpg>  
<https://www.dermis.net/bilder/CD059/550px/img0007.jpg>  
<https://www.dermis.net/bilder/CD014/550px/img0011.jpg>  
<https://www.dermis.net/bilder/CD060/550px/img0104.jpg>  
<https://www.dermis.net/bilder/CD060/550px/img0105.jpg>  
<https://www.dermis.net/bilder/CD064/550px/img0060.jpg>  
<https://www.dermis.net/bilder/CD064/550px/img0061.jpg>  
<https://www.dermis.net/bilder/CD064/550px/img0062.jpg>  
<https://www.dermis.net/bilder/CD064/550px/img0063.jpg>  
<https://www.dermis.net/bilder/CD064/550px/img0064.jpg>  
<https://www.dermis.net/bilder/CD049/550px/img0052.jpg>  
<https://www.dermis.net/bilder/CD049/550px/img0054.jpg>  
<https://www.dermis.net/bilder/CD067/550px/img0060.jpg>  
<https://www.dermis.net/bilder/CD067/550px/img0061.jpg>  
<https://www.dermis.net/bilder/CD019/550px/img0011.jpg>  
<https://www.dermis.net/bilder/CD059/550px/img0003.jpg>  
<https://www.dermis.net/bilder/CD059/550px/img0005.jpg>  
<https://www.dermis.net/bilder/CD059/550px/img0006.jpg>  
<https://www.dermis.net/bilder/CD059/550px/img0052.jpg>  
<https://www.dermis.net/bilder/CD059/550px/img0053.jpg>  
<https://www.dermis.net/bilder/CD057/550px/img0003.jpg>  
<https://www.dermis.net/bilder/CD040/550px/img0081.jpg>  
<https://www.dermis.net/bilder/CD048/550px/img0008.jpg>  
<https://www.dermis.net/bilder/CD048/550px/img0011.jpg>  
<https://www.dermis.net/bilder/CD036/550px/img0045.jpg>  
<https://www.dermis.net/bilder/CD018/550px/img0101.jpg>  
<https://www.dermis.net/bilder/CD035/550px/img0033.jpg>  
<https://www.dermis.net/bilder/CD035/550px/img0034.jpg>  
<https://www.dermis.net/bilder/CD037/550px/img0011.jpg>  
<https://www.dermis.net/bilder/CD020/550px/img0059.jpg>  
<https://www.dermis.net/bilder/CD020/550px/img0060.jpg>  
<https://www.dermis.net/bilder/CD018/550px/img0092.jpg>  
<https://www.dermis.net/bilder/CD005/550px/img0046.jpg>  
<https://www.dermis.net/bilder/CD063/550px/img0105.jpg>

<https://www.dermis.net/bilder/CD066/550px/img0086.jpg>  
<https://www.dermis.net/bilder/CD066/550px/img0087.jpg>  
<https://www.dermis.net/bilder/CD052/550px/img0088.jpg>  
<https://www.dermis.net/bilder/CD007/550px/img0022.jpg>  
<https://www.dermis.net/bilder/CD006/550px/img0090.jpg>  
<https://www.dermis.net/bilder/CD046/550px/img0073.jpg>  
<https://www.dermis.net/bilder/CD046/550px/img0074.jpg>  
<https://www.dermis.net/bilder/CD006/550px/img0024.jpg>  
<https://www.dermis.net/bilder/CD007/550px/img0054.jpg>  
<https://www.dermis.net/bilder/CD061/550px/img0013.jpg>  
<https://www.dermis.net/bilder/CD065/550px/img0034.jpg>  
<https://www.dermis.net/bilder/CD004/550px/img0098.jpg>  
<https://www.dermis.net/bilder/CD033/550px/img0095.jpg>  
<https://www.dermis.net/bilder/CD066/550px/img0105.jpg>  
<https://www.dermis.net/bilder/CD066/550px/img0106.jpg>  
<https://www.dermis.net/bilder/CD067/550px/img0095.jpg>  
<https://www.dermis.net/bilder/CD067/550px/img0096.jpg>  
<https://www.dermis.net/bilder/CD066/550px/img0001.jpg>  
<https://www.dermis.net/bilder/CD066/550px/img0003.jpg>  
<https://www.dermis.net/bilder/CD066/550px/img0004.jpg>  
<https://www.dermis.net/bilder/CD066/550px/img0005.jpg>  
<https://www.dermis.net/bilder/CD066/550px/img0006.jpg>  
<https://www.dermis.net/bilder/CD004/550px/img0001.jpg>  
<https://www.dermis.net/bilder/CD048/550px/img0030.jpg>  
<https://www.dermis.net/bilder/CD002/550px/img0090.jpg>  
<https://www.dermis.net/bilder/CD049/550px/img0046.jpg>  
<https://www.dermis.net/bilder/CD065/550px/img0103.jpg>  
<https://www.dermis.net/bilder/CD058/550px/img0074.jpg>  
<https://www.dermis.net/bilder/CD057/550px/img0033.jpg>  
<https://www.dermis.net/bilder/CD057/550px/img0008.jpg>  
<https://www.dermis.net/bilder/CD057/550px/img0012.jpg>  
<https://www.dermis.net/bilder/CD048/550px/img0106.jpg>  
<https://www.dermis.net/bilder/CD049/550px/img0075.jpg>  
<https://www.dermis.net/bilder/CD051/550px/img0034.jpg>  
<https://www.dermis.net/bilder/CD051/550px/img0035.jpg>  
<https://www.dermis.net/bilder/CD039/550px/img0098.jpg>  
<https://www.dermis.net/bilder/CD067/550px/img0106.jpg>  
<https://www.dermis.net/bilder/CD067/550px/img0107.jpg>  
<https://www.dermis.net/bilder/CD048/550px/img0040.jpg>  
<https://www.dermis.net/bilder/CD048/550px/img0041.jpg>  
<https://www.dermis.net/bilder/CD048/550px/img0042.jpg>  
<https://www.dermis.net/bilder/CD048/550px/img0043.jpg>  
<https://www.dermis.net/bilder/CD066/550px/img0084.jpg>  
<https://www.dermis.net/bilder/CD066/550px/img0085.jpg>  
<https://www.dermis.net/bilder/CD066/550px/img0100.jpg>  
<https://www.dermis.net/bilder/CD041/550px/img0032.jpg>  
<https://www.dermis.net/bilder/CD067/550px/img0049.jpg>  
<https://www.dermis.net/bilder/CD067/550px/img0050.jpg>

<https://www.dermis.net/bilder/CD067/550px/img0051.jpg>  
<https://www.dermis.net/bilder/CD067/550px/img0052.jpg>  
<https://www.dermis.net/bilder/CD058/550px/img0037.jpg>  
<https://www.dermis.net/bilder/CD058/550px/img0042.jpg>  
<https://www.dermis.net/bilder/CD058/550px/img0043.jpg>  
<https://www.dermis.net/bilder/CD058/550px/img0044.jpg>  
<https://www.dermis.net/bilder/CD058/550px/img0073.jpg>  
<https://www.dermis.net/bilder/CD058/550px/img0080.jpg>  
<https://www.dermis.net/bilder/CD060/550px/img0044.jpg>  
<https://www.dermis.net/bilder/CD060/550px/img0045.jpg>  
<https://www.dermis.net/bilder/CD047/550px/img0097.jpg>  
<https://www.dermis.net/bilder/CD048/550px/img0105.jpg>  
<https://www.dermis.net/bilder/CD047/550px/img0040.jpg>  
<https://www.dermis.net/bilder/CD066/550px/img0016.jpg>  
<https://www.dermis.net/bilder/CD066/550px/img0017.jpg>  
<https://www.dermis.net/bilder/CD066/550px/img0018.jpg>  
<https://www.dermis.net/bilder/CD066/550px/img0019.jpg>  
<https://www.dermis.net/bilder/CD066/550px/img0042.jpg>  
<https://www.dermis.net/bilder/CD066/550px/img0043.jpg>  
<https://www.dermis.net/bilder/CD066/550px/img0044.jpg>  
<https://www.dermis.net/bilder/CD066/550px/img0020.jpg>  
<https://www.dermis.net/bilder/CD014/550px/img0017.jpg>  
<https://www.dermis.net/bilder/CD040/550px/img0058.jpg>  
<https://www.dermis.net/bilder/CD050/550px/img0103.jpg>  
<https://www.dermis.net/bilder/CD046/550px/img0071.jpg>  
<https://www.dermis.net/bilder/CD060/550px/img0088.jpg>  
<https://www.dermis.net/bilder/CD060/550px/img0089.jpg>  
<https://www.dermis.net/bilder/CD067/550px/img0075.jpg>  
<https://www.dermis.net/bilder/CD067/550px/img0076.jpg>  
<https://www.dermis.net/bilder/CD049/550px/img0073.jpg>  
<https://www.dermis.net/bilder/CD049/550px/img0077.jpg>  
<https://www.dermis.net/bilder/CD054/550px/img0047.jpg>  
<https://www.dermis.net/bilder/CD048/550px/img0102.jpg>  
<https://www.dermis.net/bilder/CD051/550px/img0099.jpg>  
<https://www.dermis.net/bilder/CD050/550px/img0049.jpg>  
<https://www.dermis.net/bilder/CD050/550px/img0050.jpg>  
<https://www.dermis.net/bilder/CD050/550px/img0051.jpg>  
<https://www.dermis.net/bilder/CD065/550px/img0004.jpg>  
<https://www.dermis.net/bilder/CD067/550px/img0105.jpg>  
<https://www.dermis.net/bilder/CD014/550px/img0094.jpg>  
<https://www.dermis.net/bilder/CD058/550px/img0060.jpg>  
<https://www.dermis.net/bilder/CD065/550px/img0022.jpg>  
<https://www.dermis.net/bilder/CD046/550px/img0075.jpg>  
<https://www.dermis.net/bilder/CD027/550px/img0099.jpg>  
<https://www.dermis.net/bilder/CD067/550px/img0078.jpg>  
<https://www.dermis.net/bilder/CD067/550px/img0079.jpg>  
<https://www.dermis.net/bilder/CD036/550px/img0014.jpg>  
<https://www.dermis.net/bilder/CD023/550px/img0017.jpg>

<https://www.dermis.net/bilder/CD049/550px/img0099.jpg>  
<https://www.dermis.net/bilder/CD052/550px/img0001.jpg>  
<https://www.dermis.net/bilder/CD052/550px/img0002.jpg>  
<https://www.dermis.net/bilder/CD018/550px/img0048.jpg>  
<https://www.dermis.net/bilder/CD036/550px/img0044.jpg>  
<https://www.dermis.net/bilder/CD014/550px/img0064.jpg>  
<https://www.dermis.net/bilder/CD003/550px/img0051.jpg>  
<https://www.dermis.net/bilder/CD046/550px/img0072.jpg>  
<https://www.dermis.net/bilder/CD018/550px/img0095.jpg>  
<https://www.dermis.net/bilder/CD065/550px/img0054.jpg>  
<https://www.dermis.net/bilder/CD154/550px/img0091.jpg>  
<https://www.dermis.net/bilder/CD018/550px/img0008.jpg>  
<https://www.dermis.net/bilder/CD058/550px/img0058.jpg>  
<https://www.dermis.net/bilder/CD049/550px/img0097.jpg>  
<https://www.dermis.net/bilder/CD037/550px/img0003.jpg>  
<https://www.dermis.net/bilder/CD058/550px/img0023.jpg>  
<https://www.dermis.net/bilder/CD058/550px/img0024.jpg>  
<https://www.dermis.net/bilder/CD067/550px/img0013.jpg>  
<https://www.dermis.net/bilder/CD067/550px/img0014.jpg>  
<https://www.dermis.net/bilder/CD067/550px/img0016.jpg>  
<https://www.dermis.net/bilder/CD067/550px/img0067.jpg>  
<https://www.dermis.net/bilder/CD067/550px/img0068.jpg>  
<https://www.dermis.net/bilder/CD052/550px/img0020.jpg>  
<https://www.dermis.net/bilder/CD058/550px/img0057.jpg>  
<https://www.dermis.net/bilder/CD065/550px/img0021.jpg>  
<https://www.dermis.net/bilder/CD057/550px/img0020.jpg>  
<https://www.dermis.net/bilder/CD066/550px/img0077.jpg>  
<https://www.dermis.net/bilder/CD066/550px/img0078.jpg>  
<https://www.dermis.net/bilder/CD060/550px/img0054.jpg>  
<https://www.dermis.net/bilder/CD058/550px/img0088.jpg>  
<https://www.dermis.net/bilder/CD060/550px/img0055.jpg>  
<https://www.dermis.net/bilder/CD060/550px/img0056.jpg>  
<https://www.dermis.net/bilder/CD060/550px/img0053.jpg>  
<https://www.dermis.net/bilder/CD047/550px/img0091.jpg>  
<https://www.dermis.net/bilder/CD047/550px/img0093.jpg>  
<https://www.dermis.net/bilder/CD066/550px/img0027.jpg>  
<https://www.dermis.net/bilder/CD066/550px/img0029.jpg>  
<https://www.dermis.net/bilder/CD066/550px/img0030.jpg>  
<https://www.dermis.net/bilder/CD066/550px/img0031.jpg>  
<https://www.dermis.net/bilder/CD059/550px/img0073.jpg>  
<https://www.dermis.net/bilder/CD059/550px/img0074.jpg>  
<https://www.dermis.net/bilder/CD059/550px/img0075.jpg>  
<https://www.dermis.net/bilder/CD059/550px/img0076.jpg>  
<https://www.dermis.net/bilder/CD024/550px/img0004.jpg>  
<https://www.dermis.net/bilder/CD052/550px/img0013.jpg>  
<https://www.dermis.net/bilder/CD063/550px/img0074.jpg>  
<https://www.dermis.net/bilder/CD039/550px/img0044.jpg>  
<https://www.dermis.net/bilder/CD060/550px/img0057.jpg>

<https://www.dermis.net/bilder/CD051/550px/img0065.jpg>  
<https://www.dermis.net/bilder/CD051/550px/img0067.jpg>  
<https://www.dermis.net/bilder/CD051/550px/img0068.jpg>  
<https://www.dermis.net/bilder/CD060/550px/img0081.jpg>  
<https://www.dermis.net/bilder/CD041/550px/img0015.jpg>  
<https://www.dermis.net/bilder/CD014/550px/img0096.jpg>  
<https://www.dermis.net/bilder/CD040/550px/img0022.jpg>  
<https://www.dermis.net/bilder/CD060/550px/img0059.jpg>  
<https://www.dermis.net/bilder/CD060/550px/img0060.jpg>  
<https://www.dermis.net/bilder/CD040/550px/img0079.jpg>  
<https://www.dermis.net/bilder/CD067/550px/img0081.jpg>  
<https://www.dermis.net/bilder/CD025/550px/img0082.jpg>  
<https://www.dermis.net/bilder/CD032/550px/img0086.jpg>  
<https://www.dermis.net/bilder/CD039/550px/img0055.jpg>  
<https://www.dermis.net/bilder/CD050/550px/img0055.jpg>  
<https://www.dermis.net/bilder/CD064/550px/img0071.jpg>  
<https://www.dermis.net/bilder/CD064/550px/img0072.jpg>  
<https://www.dermis.net/bilder/CD007/550px/img0010.jpg>  
<https://www.dermis.net/bilder/CD067/550px/img0030.jpg>  
<https://www.dermis.net/bilder/CD067/550px/img0031.jpg>  
<https://www.dermis.net/bilder/CD067/550px/img0032.jpg>  
<https://www.dermis.net/bilder/CD064/550px/img0099.jpg>  
<https://www.dermis.net/bilder/CD064/550px/img0100.jpg>  
<https://www.dermis.net/bilder/CD063/550px/img0072.jpg>  
<https://www.dermis.net/bilder/CD066/550px/img0069.jpg>  
<https://www.dermis.net/bilder/CD057/550px/img0027.jpg>  
<https://www.dermis.net/bilder/CD060/550px/img0049.jpg>  
<https://www.dermis.net/bilder/CD060/550px/img0050.jpg>  
<https://www.dermis.net/bilder/CD005/550px/img0100.jpg>  
<https://www.dermis.net/bilder/CD020/550px/img0087.jpg>  
<https://www.dermis.net/bilder/CD032/550px/img0027.jpg>  
<https://www.dermis.net/bilder/CD032/550px/img0028.jpg>  
<https://www.dermis.net/bilder/CD027/550px/img0083.jpg>  
<https://www.dermis.net/bilder/CD026/550px/img0097.jpg>  
<https://www.dermis.net/bilder/CD063/550px/img0089.jpg>  
<https://www.dermis.net/bilder/CD048/550px/img0054.jpg>  
<https://www.dermis.net/bilder/CD048/550px/img0055.jpg>  
<https://www.dermis.net/bilder/CD048/550px/img0056.jpg>  
<https://www.dermis.net/bilder/CD060/550px/img0070.jpg>  
<https://www.dermis.net/bilder/CD027/550px/img0085.jpg>  
<https://www.dermis.net/bilder/CD048/550px/img0103.jpg>  
<https://www.dermis.net/bilder/CD057/550px/img0028.jpg>  
<https://www.dermis.net/bilder/CD067/550px/img0097.jpg>  
<https://www.dermis.net/bilder/CD024/550px/img0029.jpg>  
<https://www.dermis.net/bilder/CD064/550px/img0104.jpg>  
<https://www.dermis.net/bilder/CD005/550px/img0088.jpg>  
<https://www.dermis.net/bilder/CD032/550px/img0032.jpg>  
<https://www.dermis.net/bilder/CD154/550px/img0084.jpg>

<https://www.dermis.net/bilder/CD154/550px/img0085.jpg>  
<https://www.dermis.net/bilder/CD154/550px/img0086.jpg>  
<https://www.dermis.net/bilder/CD154/550px/img0087.jpg>  
<https://www.dermis.net/bilder/CD057/550px/img0045.jpg>  
<https://www.dermis.net/bilder/CD065/550px/img0102.jpg>  
<https://www.dermis.net/bilder/CD067/550px/img0040.jpg>  
<https://www.dermis.net/bilder/CD067/550px/img0041.jpg>  
<https://www.dermis.net/bilder/CD040/550px/img0092.jpg>  
<https://www.dermis.net/bilder/CD067/550px/img0071.jpg>  
<https://www.dermis.net/bilder/CD067/550px/img0069.jpg>  
<https://www.dermis.net/bilder/CD040/550px/img0026.jpg>  
<https://www.dermis.net/bilder/CD040/550px/img0027.jpg>  
<https://www.dermis.net/bilder/CD040/550px/img0028.jpg>  
<https://www.dermis.net/bilder/CD061/550px/img0011.jpg>  
<https://www.dermis.net/bilder/CD067/550px/img0038.jpg>  
<https://www.dermis.net/bilder/CD067/550px/img0039.jpg>  
<https://www.dermis.net/bilder/CD066/550px/img0088.jpg>  
<https://www.dermis.net/bilder/CD066/550px/img0089.jpg>  
<https://www.dermis.net/bilder/CD027/550px/img0057.jpg>  
<https://www.dermis.net/bilder/CD027/550px/img0060.jpg>  
<https://www.dermis.net/bilder/CD039/550px/img0026.jpg>  
<https://www.dermis.net/bilder/CD065/550px/img0045.jpg>  
<https://www.dermis.net/bilder/CD065/550px/img0046.jpg>  
<https://www.dermis.net/bilder/CD054/550px/img0083.jpg>  
<https://www.dermis.net/bilder/CD060/550px/img0082.jpg>  
<https://www.dermis.net/bilder/CD060/550px/img0083.jpg>  
<https://www.dermis.net/bilder/CD005/550px/img0106.jpg>  
<https://www.dermis.net/bilder/CD044/550px/img0065.jpg>  
<https://www.dermis.net/bilder/CD065/550px/img0068.jpg>  
<https://www.dermis.net/bilder/CD065/550px/img0069.jpg>  
<https://www.dermis.net/bilder/CD065/550px/img0070.jpg>  
<https://www.dermis.net/bilder/CD003/550px/img0013.jpg>  
<https://www.dermis.net/bilder/CD040/550px/img0097.jpg>  
<https://www.dermis.net/bilder/CD051/550px/img0027.jpg>  
<https://www.dermis.net/bilder/CD051/550px/img0028.jpg>  
<https://www.dermis.net/bilder/CD006/550px/img0029.jpg>  
<https://www.dermis.net/bilder/CD059/550px/img0024.jpg>  
<https://www.dermis.net/bilder/CD067/550px/img0104.jpg>  
<https://www.dermis.net/bilder/CD007/550px/img0014.jpg>  
<https://www.dermis.net/bilder/CD064/550px/img0108.jpg>  
<https://www.dermis.net/bilder/CD059/550px/img0033.jpg>  
<https://www.dermis.net/bilder/CD065/550px/img0101.jpg>  
<https://www.dermis.net/bilder/CD032/550px/img0056.jpg>  
<https://www.dermis.net/bilder/CD060/550px/img0090.jpg>  
<https://www.dermis.net/bilder/CD060/550px/img0091.jpg>  
<https://www.dermis.net/bilder/CD060/550px/img0092.jpg>  
<https://www.dermis.net/bilder/CD067/550px/img0088.jpg>  
<https://www.dermis.net/bilder/CD051/550px/img0024.jpg>

<https://www.dermis.net/bilder/CD046/550px/img0100.jpg>  
<https://www.dermis.net/bilder/CD060/550px/img0096.jpg>  
<https://www.dermis.net/bilder/CD018/550px/img0005.jpg>  
<https://www.dermis.net/bilder/CD049/550px/img0059.jpg>  
<https://www.dermis.net/bilder/CD049/550px/img0060.jpg>  
<https://www.dermis.net/bilder/CD060/550px/img0013.jpg>  
<https://www.dermis.net/bilder/CD060/550px/img0014.jpg>  
<https://www.dermis.net/bilder/CD060/550px/img0015.jpg>  
<https://www.dermis.net/bilder/CD063/550px/img0093.jpg>  
<https://www.dermis.net/bilder/CD006/550px/img0062.jpg>  
<https://www.dermis.net/bilder/CD067/550px/img0091.jpg>  
<https://www.dermis.net/bilder/CD067/550px/img0092.jpg>  
<https://www.dermis.net/bilder/CD048/550px/img0047.jpg>  
<https://www.dermis.net/bilder/CD067/550px/img0086.jpg>  
<https://www.dermis.net/bilder/CD067/550px/img0087.jpg>  
<https://www.dermis.net/bilder/CD047/550px/img0042.jpg>  
<https://www.dermis.net/bilder/CD047/550px/img0043.jpg>  
<https://www.dermis.net/bilder/CD025/550px/img0076.jpg>  
<https://www.dermis.net/bilder/CD047/550px/img0020.jpg>  
<https://www.dermis.net/bilder/CD067/550px/img0053.jpg>  
<https://www.dermis.net/bilder/CD067/550px/img0054.jpg>  
<https://www.dermis.net/bilder/CD067/550px/img0055.jpg>  
<https://www.dermis.net/bilder/CD067/550px/img0056.jpg>  
<https://www.dermis.net/bilder/CD059/550px/img0077.jpg>  
<https://www.dermis.net/bilder/CD059/550px/img0078.jpg>  
<https://www.dermis.net/bilder/CD059/550px/img0080.jpg>  
<https://www.dermis.net/bilder/CD063/550px/img0097.jpg>  
<https://www.dermis.net/bilder/CD063/550px/img0059.jpg>  
<https://www.dermis.net/bilder/CD063/550px/img0060.jpg>  
<https://www.dermis.net/bilder/CD067/550px/img0074.jpg>  
<https://www.dermis.net/bilder/CD048/550px/img0067.jpg>  
<https://www.dermis.net/bilder/CD052/550px/img0045.jpg>  
<https://www.dermis.net/bilder/CD035/550px/img0017.jpg>  
<https://www.dermis.net/bilder/CD027/550px/img0081.jpg>  
<https://www.dermis.net/bilder/CD027/550px/img0082.jpg>  
<https://www.dermis.net/bilder/CD034/550px/img0061.jpg>  
<https://www.dermis.net/bilder/CD033/550px/img0056.jpg>  
<https://www.dermis.net/bilder/CD041/550px/img0031.jpg>  
<https://www.dermis.net/bilder/CD063/550px/img0088.jpg>  
<https://www.dermis.net/bilder/CD063/550px/img0075.jpg>  
<https://www.dermis.net/bilder/CD063/550px/img0076.jpg>  
<https://www.dermis.net/bilder/CD005/550px/img0025.jpg>  
<https://www.dermis.net/bilder/CD047/550px/img0019.jpg>  
<https://www.dermis.net/bilder/CD039/550px/img0018.jpg>  
<https://www.dermis.net/bilder/CD047/550px/img0057.jpg>  
<https://www.dermis.net/bilder/CD047/550px/img0059.jpg>  
<https://www.dermis.net/bilder/CD037/550px/img0072.jpg>  
<https://www.dermis.net/bilder/CD057/550px/img0031.jpg>

<https://www.dermis.net/bilder/CD066/550px/img0092.jpg>  
<https://www.dermis.net/bilder/CD066/550px/img0093.jpg>  
<https://www.dermis.net/bilder/CD034/550px/img0081.jpg>  
<https://www.dermis.net/bilder/CD063/550px/img0102.jpg>  
<https://www.dermis.net/bilder/CD063/550px/img0103.jpg>  
<https://www.dermis.net/bilder/CD060/550px/img0066.jpg>  
<https://www.dermis.net/bilder/CD060/550px/img0067.jpg>  
<https://www.dermis.net/bilder/CD060/550px/img0068.jpg>  
<https://www.dermis.net/bilder/CD060/550px/img0072.jpg>  
<https://www.dermis.net/bilder/CD058/550px/img0005.jpg>  
<https://www.dermis.net/bilder/CD058/550px/img0011.jpg>  
<https://www.dermis.net/bilder/CD058/550px/img0012.jpg>  
<https://www.dermis.net/bilder/CD052/550px/img0017.jpg>  
<https://www.dermis.net/bilder/CD065/550px/img0019.jpg>  
<https://www.dermis.net/bilder/CD057/550px/img0030.jpg>  
<https://www.dermis.net/bilder/CD007/550px/img0017.jpg>  
<https://www.dermis.net/bilder/CD040/550px/img0061.jpg>  
<https://www.dermis.net/bilder/CD032/550px/img0096.jpg>  
<https://www.dermis.net/bilder/CD066/550px/img0046.jpg>  
<https://www.dermis.net/bilder/CD066/550px/img0047.jpg>  
<https://www.dermis.net/bilder/CD066/550px/img0048.jpg>  
<https://www.dermis.net/bilder/CD154/550px/img0036.jpg>  
<https://www.dermis.net/bilder/CD020/550px/img0096.jpg>  
<https://www.dermis.net/bilder/CD066/550px/img0082.jpg>  
<https://www.dermis.net/bilder/CD066/550px/img0083.jpg>  
<https://www.dermis.net/bilder/CD016/550px/img0060.jpg>  
<https://www.dermis.net/bilder/CD058/550px/img0082.jpg>  
<https://www.dermis.net/bilder/CD058/550px/img0056.jpg>  
<https://www.dermis.net/bilder/CD058/550px/img0083.jpg>  
<https://www.dermis.net/bilder/CD066/550px/img0094.jpg>  
<https://www.dermis.net/bilder/CD066/550px/img0095.jpg>  
<https://www.dermis.net/bilder/CD052/550px/img0025.jpg>  
<https://www.dermis.net/bilder/CD049/550px/img0086.jpg>  
<https://www.dermis.net/bilder/CD058/550px/img0055.jpg>  
<https://www.dermis.net/bilder/CD059/550px/img0054.jpg>  
<https://www.dermis.net/bilder/CD059/550px/img0055.jpg>  
<https://www.dermis.net/bilder/CD059/550px/img0056.jpg>  
<https://www.dermis.net/bilder/CD048/550px/img0076.jpg>  
<https://www.dermis.net/bilder/CD054/550px/img0080.jpg>  
<https://www.dermis.net/bilder/CD054/550px/img0081.jpg>  
<https://www.dermis.net/bilder/CD054/550px/img0082.jpg>  
<https://www.dermis.net/bilder/CD028/550px/img0069.jpg>  
<https://www.dermis.net/bilder/CD028/550px/img0070.jpg>  
<https://www.dermis.net/bilder/CD063/550px/img0018.jpg>  
<https://www.dermis.net/bilder/CD063/550px/img0019.jpg>  
<https://www.dermis.net/bilder/CD063/550px/img0020.jpg>  
<https://www.dermis.net/bilder/CD063/550px/img0021.jpg>  
<https://www.dermis.net/bilder/CD037/550px/img0012.jpg>



<https://www.dermis.net/bilder/CD032/550px/img0075.jpg>  
<https://www.dermis.net/bilder/CD060/550px/img0106.jpg>  
<https://www.dermis.net/bilder/CD026/550px/img0045.jpg>  
<https://www.dermis.net/bilder/CD018/550px/img0098.jpg>  
<https://www.dermis.net/bilder/CD051/550px/img0036.jpg>  
<https://www.dermis.net/bilder/CD018/550px/img0010.jpg>  
<https://www.dermis.net/bilder/CD003/550px/img0085.jpg>  
<https://www.dermis.net/bilder/CD057/550px/img0022.jpg>  
<https://www.dermis.net/bilder/CD059/550px/img0027.jpg>  
<https://www.dermis.net/bilder/CD059/550px/img0028.jpg>  
<https://www.dermis.net/bilder/CD060/550px/img0038.jpg>  
<https://www.dermis.net/bilder/CD046/550px/img0032.jpg>  
<https://www.dermis.net/bilder/CD060/550px/img0084.jpg>  
<https://www.dermis.net/bilder/CD066/550px/img0049.jpg>  
<https://www.dermis.net/bilder/CD066/550px/img0050.jpg>  
<https://www.dermis.net/bilder/CD014/550px/img0051.jpg>  
<https://www.dermis.net/bilder/CD066/550px/img0058.jpg>  
<https://www.dermis.net/bilder/CD066/550px/img0059.jpg>  
<https://www.dermis.net/bilder/CD042/550px/img0051.jpg>  
<https://www.dermis.net/bilder/CD060/550px/img0037.jpg>  
<https://www.dermis.net/bilder/CD066/550px/img0051.jpg>  
<https://www.dermis.net/bilder/CD066/550px/img0052.jpg>  
<https://www.dermis.net/bilder/CD060/550px/img0040.jpg>  
<https://www.dermis.net/bilder/CD060/550px/img0041.jpg>  
<https://www.dermis.net/bilder/CD058/550px/img0050.jpg>  
<https://www.dermis.net/bilder/CD066/550px/img0071.jpg>  
<https://www.dermis.net/bilder/CD066/550px/img0072.jpg>  
<https://www.dermis.net/bilder/CD018/550px/img0017.jpg>  
<https://www.dermis.net/bilder/CD057/550px/img0025.jpg>  
<https://www.dermis.net/bilder/CD057/550px/img0026.jpg>  
<https://www.dermis.net/bilder/CD059/550px/img0064.jpg>  
<https://www.dermis.net/bilder/CD059/550px/img0065.jpg>  
<https://www.dermis.net/bilder/CD059/550px/img0066.jpg>  
<https://www.dermis.net/bilder/CD063/550px/img0041.jpg>  
<https://www.dermis.net/bilder/CD063/550px/img0042.jpg>  
<https://www.dermis.net/bilder/CD063/550px/img0043.jpg>  
<https://www.dermis.net/bilder/CD059/550px/img0067.jpg>  
<https://www.dermis.net/bilder/CD039/550px/img0031.jpg>  
<https://www.dermis.net/bilder/CD057/550px/img0046.jpg>  
<https://www.dermis.net/bilder/CD057/550px/img0047.jpg>  
<https://www.dermis.net/bilder/CD067/550px/img0101.jpg>  
<https://www.dermis.net/bilder/CD067/550px/img0102.jpg>  
<https://www.dermis.net/bilder/CD060/550px/img0071.jpg>  
<https://www.dermis.net/bilder/CD026/550px/img0026.jpg>  
<https://www.dermis.net/bilder/CD026/550px/img0027.jpg>  
<https://www.dermis.net/bilder/CD064/550px/img0107.jpg>  
<https://www.dermis.net/bilder/CD065/550px/img0071.jpg>  
<https://www.dermis.net/bilder/CD066/550px/img0008.jpg>

<https://www.dermis.net/bilder/CD066/550px/img0009.jpg>  
<https://www.dermis.net/bilder/CD058/550px/img0066.jpg>  
<https://www.dermis.net/bilder/CD058/550px/img0067.jpg>  
<https://www.dermis.net/bilder/CD058/550px/img0068.jpg>  
<https://www.dermis.net/bilder/CD035/550px/img0053.jpg>  
<https://www.dermis.net/bilder/CD046/550px/img0049.jpg>  
<https://www.dermis.net/bilder/CD058/550px/img0039.jpg>  
<https://www.dermis.net/bilder/CD036/550px/img0095.jpg>  
<https://www.dermis.net/bilder/CD003/550px/img0022.jpg>  
<https://www.dermis.net/bilder/CD052/550px/img0027.jpg>  
<https://www.dermis.net/bilder/CD052/550px/img0028.jpg>  
<https://www.dermis.net/bilder/CD087/550px/img0068.jpg>  
<https://www.dermis.net/bilder/CD085/550px/img0100.jpg>  
<https://www.dermis.net/bilder/CD088/550px/img0024.jpg>  
<https://www.dermis.net/bilder/CD088/550px/img0025.jpg>  
<https://www.dermis.net/bilder/CD093/550px/img0001.jpg>  
<https://www.dermis.net/bilder/CD093/550px/img0002.jpg>  
<https://www.dermis.net/bilder/CD093/550px/img0003.jpg>  
<https://www.dermis.net/bilder/CD093/550px/img0004.jpg>  
<https://www.dermis.net/bilder/CD093/550px/img0005.jpg>  
<https://www.dermis.net/bilder/CD093/550px/img0006.jpg>  
<https://www.dermis.net/bilder/CD082/550px/img0001.jpg>  
<https://www.dermis.net/bilder/CD082/550px/img0041.jpg>  
<https://www.dermis.net/bilder/CD095/550px/img0043.jpg>  
<https://www.dermis.net/bilder/CD103/550px/img0010.jpg>  
<https://www.dermis.net/bilder/CD106/550px/img0059.jpg>  
<https://www.dermis.net/bilder/CD106/550px/img0062.jpg>  
<https://www.dermis.net/bilder/CD106/550px/img0064.jpg>  
<https://www.dermis.net/bilder/CD099/550px/img0007.jpg>  
<https://www.dermis.net/bilder/CD085/550px/img0008.jpg>  
<https://www.dermis.net/bilder/CD085/550px/img0009.jpg>  
<https://www.dermis.net/bilder/CD085/550px/img0011.jpg>  
<https://www.dermis.net/bilder/CD106/550px/img0071.jpg>  
<https://www.dermis.net/bilder/CD093/550px/img0041.jpg>  
<https://www.dermis.net/bilder/CD098/550px/img0013.jpg>  
<https://www.dermis.net/bilder/CD099/550px/img0027.jpg>  
<https://www.dermis.net/bilder/CD099/550px/img0029.jpg>  
<https://www.dermis.net/bilder/CD086/550px/img0044.jpg>  
<https://www.dermis.net/bilder/CD087/550px/img0080.jpg>  
<https://www.dermis.net/bilder/CD085/550px/img0082.jpg>  
<https://www.dermis.net/bilder/CD085/550px/img0083.jpg>  
<https://www.dermis.net/bilder/CD085/550px/img0084.jpg>  
<https://www.dermis.net/bilder/CD085/550px/img0085.jpg>  
<https://www.dermis.net/bilder/CD097/550px/img0091.jpg>  
<https://www.dermis.net/bilder/CD085/550px/img0040.jpg>  
<https://www.dermis.net/bilder/CD085/550px/img0042.jpg>  
<https://www.dermis.net/bilder/CD085/550px/img0043.jpg>  
<https://www.dermis.net/bilder/CD107/550px/img0016.jpg>

<https://www.dermis.net/bilder/CD107/550px/img0018.jpg>  
<https://www.dermis.net/bilder/CD088/550px/img0022.jpg>  
<https://www.dermis.net/bilder/CD106/550px/img0072.jpg>  
<https://www.dermis.net/bilder/CD106/550px/img0073.jpg>  
<https://www.dermis.net/bilder/CD106/550px/img0074.jpg>  
<https://www.dermis.net/bilder/CD087/550px/img0010.jpg>  
<https://www.dermis.net/bilder/CD087/550px/img0011.jpg>  
<https://www.dermis.net/bilder/CD097/550px/img0032.jpg>  
<https://www.dermis.net/bilder/CD097/550px/img0033.jpg>  
<https://www.dermis.net/bilder/CD093/550px/img0059.jpg>  
<https://www.dermis.net/bilder/CD093/550px/img0088.jpg>  
<https://www.dermis.net/bilder/CD093/550px/img0089.jpg>  
<https://www.dermis.net/bilder/CD093/550px/img0090.jpg>  
<https://www.dermis.net/bilder/CD098/550px/img0059.jpg>  
<https://www.dermis.net/bilder/CD098/550px/img0060.jpg>  
<https://www.dermis.net/bilder/CD098/550px/img0061.jpg>  
<https://www.dermis.net/bilder/CD096/550px/img0001.jpg>  
<https://www.dermis.net/bilder/CD098/550px/img0021.jpg>  
<https://www.dermis.net/bilder/CD085/550px/img0044.jpg>  
<https://www.dermis.net/bilder/CD085/550px/img0096.jpg>  
<https://www.dermis.net/bilder/CD085/550px/img0097.jpg>  
<https://www.dermis.net/bilder/CD085/550px/img0099.jpg>  
<https://www.dermis.net/bilder/CD098/550px/img0025.jpg>  
<https://www.dermis.net/bilder/CD107/550px/img0054.jpg>  
<https://www.dermis.net/bilder/CD107/550px/img0055.jpg>  
<https://www.dermis.net/bilder/CD107/550px/img0056.jpg>  
<https://www.dermis.net/bilder/CD097/550px/img0055.jpg>  
<https://www.dermis.net/bilder/CD085/550px/img0033.jpg>  
<https://www.dermis.net/bilder/CD085/550px/img0034.jpg>  
<https://www.dermis.net/bilder/CD085/550px/img0035.jpg>  
<https://www.dermis.net/bilder/CD087/550px/img0090.jpg>  
<https://www.dermis.net/bilder/CD088/550px/img0001.jpg>  
<https://www.dermis.net/bilder/CD088/550px/img0003.jpg>  
<https://www.dermis.net/bilder/CD085/550px/img0052.jpg>  
<https://www.dermis.net/bilder/CD085/550px/img0053.jpg>  
<https://www.dermis.net/bilder/CD085/550px/img0054.jpg>  
<https://www.dermis.net/bilder/CD085/550px/img0055.jpg>  
<https://www.dermis.net/bilder/CD087/550px/img0099.jpg>  
<https://www.dermis.net/bilder/CD087/550px/img0100.jpg>  
<https://www.dermis.net/bilder/CD086/550px/img0096.jpg>  
<https://www.dermis.net/bilder/CD085/550px/img0089.jpg>  
<https://www.dermis.net/bilder/CD107/550px/img0040.jpg>  
<https://www.dermis.net/bilder/CD107/550px/img0041.jpg>  
<https://www.dermis.net/bilder/CD107/550px/img0042.jpg>  
<https://www.dermis.net/bilder/CD088/550px/img0093.jpg>  
<https://www.dermis.net/bilder/CD088/550px/img0094.jpg>  
<https://www.dermis.net/bilder/CD088/550px/img0095.jpg>  
<https://www.dermis.net/bilder/CD099/550px/img0017.jpg>

<https://www.dermis.net/bilder/CD099/550px/img0025.jpg>  
<https://www.dermis.net/bilder/CD099/550px/img0026.jpg>  
<https://www.dermis.net/bilder/CD085/550px/img0037.jpg>  
<https://www.dermis.net/bilder/CD085/550px/img0039.jpg>  
<https://www.dermis.net/bilder/CD088/550px/img0031.jpg>  
<https://www.dermis.net/bilder/CD088/550px/img0032.jpg>  
<https://www.dermis.net/bilder/CD088/550px/img0033.jpg>  
<https://www.dermis.net/bilder/CD088/550px/img0034.jpg>  
<https://www.dermis.net/bilder/CD088/550px/img0035.jpg>  
<https://www.dermis.net/bilder/CD099/550px/img0028.jpg>  
<https://www.dermis.net/bilder/CD099/550px/img0030.jpg>  
<https://www.dermis.net/bilder/CD099/550px/img0032.jpg>  
<https://www.dermis.net/bilder/CD098/550px/img0072.jpg>  
<https://www.dermis.net/bilder/CD097/550px/img0090.jpg>  
<https://www.dermis.net/bilder/CD085/550px/img0001.jpg>  
<https://www.dermis.net/bilder/CD085/550px/img0003.jpg>  
<https://www.dermis.net/bilder/CD085/550px/img0004.jpg>  
<https://www.dermis.net/bilder/CD098/550px/img0032.jpg>  
<https://www.dermis.net/bilder/CD098/550px/img0037.jpg>  
<https://www.dermis.net/bilder/CD098/550px/img0038.jpg>  
<https://www.dermis.net/bilder/CD098/550px/img0039.jpg>  
<https://www.dermis.net/bilder/CD098/550px/img0040.jpg>  
<https://www.dermis.net/bilder/CD097/550px/img0073.jpg>  
<https://www.dermis.net/bilder/CD097/550px/img0074.jpg>  
<https://www.dermis.net/bilder/CD096/550px/img0051.jpg>  
<https://www.dermis.net/bilder/CD085/550px/img0090.jpg>  
<https://www.dermis.net/bilder/CD085/550px/img0091.jpg>  
<https://www.dermis.net/bilder/CD085/550px/img0092.jpg>  
<https://www.dermis.net/bilder/CD085/550px/img0093.jpg>  
<https://www.dermis.net/bilder/CD085/550px/img0094.jpg>  
<https://www.dermis.net/bilder/CD085/550px/img0095.jpg>  
<https://www.dermis.net/bilder/CD093/550px/img0080.jpg>  
<https://www.dermis.net/bilder/CD093/550px/img0081.jpg>  
<https://www.dermis.net/bilder/CD093/550px/img0082.jpg>  
<https://www.dermis.net/bilder/CD106/550px/img0010.jpg>  
<https://www.dermis.net/bilder/CD093/550px/img0058.jpg>  
<https://www.dermis.net/bilder/CD093/550px/img0060.jpg>  
<https://www.dermis.net/bilder/CD093/550px/img0087.jpg>  
<https://www.dermis.net/bilder/CD097/550px/img0081.jpg>  
<https://www.dermis.net/bilder/CD086/550px/img0019.jpg>  
<https://www.dermis.net/bilder/CD086/550px/img0022.jpg>  
<https://www.dermis.net/bilder/CD086/550px/img0023.jpg>  
<https://www.dermis.net/bilder/CD088/550px/img0057.jpg>  
<https://www.dermis.net/bilder/CD098/550px/img0018.jpg>  
<https://www.dermis.net/bilder/CD098/550px/img0019.jpg>  
<https://www.dermis.net/bilder/CD088/550px/img0028.jpg>  
<https://www.dermis.net/bilder/CD106/550px/img0075.jpg>  
<https://www.dermis.net/bilder/CD107/550px/img0028.jpg>

<https://www.dermis.net/bilder/CD085/550px/img0018.jpg>  
<https://www.dermis.net/bilder/CD085/550px/img0019.jpg>  
<https://www.dermis.net/bilder/CD088/550px/img0036.jpg>  
<https://www.dermis.net/bilder/CD085/550px/img0038.jpg>  
<https://www.dermis.net/bilder/CD087/550px/img0091.jpg>  
<https://www.dermis.net/bilder/CD087/550px/img0092.jpg>  
<https://www.dermis.net/bilder/CD097/550px/img0061.jpg>  
<https://www.dermis.net/bilder/CD097/550px/img0062.jpg>  
<https://www.dermis.net/bilder/CD097/550px/img0063.jpg>  
<https://www.dermis.net/bilder/CD097/550px/img0064.jpg>  
<https://www.dermis.net/bilder/CD085/550px/img0045.jpg>  
<https://www.dermis.net/bilder/CD085/550px/img0046.jpg>  
<https://www.dermis.net/bilder/CD085/550px/img0047.jpg>  
<https://www.dermis.net/bilder/CD085/550px/img0048.jpg>  
<https://www.dermis.net/bilder/CD085/550px/img0049.jpg>  
<https://www.dermis.net/bilder/CD099/550px/img0013.jpg>  
<https://www.dermis.net/bilder/CD099/550px/img0061.jpg>  
<https://www.dermis.net/bilder/CD099/550px/img0062.jpg>  
<https://www.dermis.net/bilder/CD088/550px/img0064.jpg>  
<https://www.dermis.net/bilder/CD088/550px/img0065.jpg>  
<https://www.dermis.net/bilder/CD088/550px/img0023.jpg>  
<https://www.dermis.net/bilder/CD087/550px/img0013.jpg>  
<https://www.dermis.net/bilder/CD087/550px/img0014.jpg>  
<https://www.dermis.net/bilder/CD087/550px/img0072.jpg>  
<https://www.dermis.net/bilder/CD087/550px/img0073.jpg>  
<https://www.dermis.net/bilder/CD093/550px/img0025.jpg>  
<https://www.dermis.net/bilder/CD087/550px/img0042.jpg>  
<https://www.dermis.net/bilder/CD087/550px/img0044.jpg>  
<https://www.dermis.net/bilder/CD087/550px/img0045.jpg>  
<https://www.dermis.net/bilder/CD086/550px/img0099.jpg>  
<https://www.dermis.net/bilder/CD085/550px/img0056.jpg>  
<https://www.dermis.net/bilder/CD085/550px/img0057.jpg>  
<https://www.dermis.net/bilder/CD085/550px/img0058.jpg>  
<https://www.dermis.net/bilder/CD099/550px/img0075.jpg>  
<https://www.dermis.net/bilder/CD099/550px/img0076.jpg>  
<https://www.dermis.net/bilder/CD097/550px/img0021.jpg>  
<https://www.dermis.net/bilder/CD097/550px/img0022.jpg>  
<https://www.dermis.net/bilder/CD097/550px/img0023.jpg>  
<https://www.dermis.net/bilder/CD097/550px/img0030.jpg>  
<https://www.dermis.net/bilder/CD104/550px/img0038.jpg>  
<https://www.dermis.net/bilder/CD107/550px/img0015.jpg>  
<https://www.dermis.net/bilder/CD109/550px/img0068.jpg>  
<https://www.dermis.net/bilder/CD103/550px/img0026.jpg>  
<https://www.dermis.net/bilder/CD103/550px/img0031.jpg>  
<https://www.dermis.net/bilder/CD104/550px/img0066.jpg>  
<https://www.dermis.net/bilder/CD105/550px/img0014.jpg>  
<https://www.dermis.net/bilder/CD106/550px/img0058.jpg>  
<https://www.dermis.net/bilder/CD106/550px/img0065.jpg>

<https://www.dermis.net/bilder/CD106/550px/img0068.jpg>  
<https://www.dermis.net/bilder/CD109/550px/img0013.jpg>  
<https://www.dermis.net/bilder/CD098/550px/img0041.jpg>  
<https://www.dermis.net/bilder/CD099/550px/img0098.jpg>  
<https://www.dermis.net/bilder/CD098/550px/img0014.jpg>  
<https://www.dermis.net/bilder/CD098/550px/img0015.jpg>  
<https://www.dermis.net/bilder/CD098/550px/img0016.jpg>  
<https://www.dermis.net/bilder/CD099/550px/img0084.jpg>  
<https://www.dermis.net/bilder/CD087/550px/img0074.jpg>  
<https://www.dermis.net/bilder/CD086/550px/img0045.jpg>  
<https://www.dermis.net/bilder/CD098/550px/img0053.jpg>  
<https://www.dermis.net/bilder/CD085/550px/img0010.jpg>  
<https://www.dermis.net/bilder/CD099/550px/img0016.jpg>  
<https://www.dermis.net/bilder/CD099/550px/img0066.jpg>  
<https://www.dermis.net/bilder/CD087/550px/img0060.jpg>  
<https://www.dermis.net/bilder/CD087/550px/img0061.jpg>  
<https://www.dermis.net/bilder/CD086/550px/img0100.jpg>  
<https://www.dermis.net/bilder/CD088/550px/img0013.jpg>  
<https://www.dermis.net/bilder/CD088/550px/img0014.jpg>  
<https://www.dermis.net/bilder/CD087/550px/img0064.jpg>  
<https://www.dermis.net/bilder/CD087/550px/img0065.jpg>  
<https://www.dermis.net/bilder/CD087/550px/img0066.jpg>  
<https://www.dermis.net/bilder/CD093/550px/img0040.jpg>  
<https://www.dermis.net/bilder/CD093/550px/img0042.jpg>  
<https://www.dermis.net/bilder/CD093/550px/img0043.jpg>  
<https://www.dermis.net/bilder/CD106/550px/img0033.jpg>  
<https://www.dermis.net/bilder/CD107/550px/img0022.jpg>  
<https://www.dermis.net/bilder/CD110/550px/img0091.jpg>  
<https://www.dermis.net/bilder/CD088/550px/img0008.jpg>  
<https://www.dermis.net/bilder/CD107/550px/img0057.jpg>  
<https://www.dermis.net/bilder/CD107/550px/img0058.jpg>  
<https://www.dermis.net/bilder/CD094/550px/img0020.jpg>  
<https://www.dermis.net/bilder/CD088/550px/img0083.jpg>  
<https://www.dermis.net/bilder/CD088/550px/img0084.jpg>  
<https://www.dermis.net/bilder/CD097/550px/img0014.jpg>  
<https://www.dermis.net/bilder/CD097/550px/img0015.jpg>  
<https://www.dermis.net/bilder/CD097/550px/img0069.jpg>  
<https://www.dermis.net/bilder/CD097/550px/img0070.jpg>  
<https://www.dermis.net/bilder/CD106/550px/img0024.jpg>  
<https://www.dermis.net/bilder/CD087/550px/img0015.jpg>  
<https://www.dermis.net/bilder/CD087/550px/img0012.jpg>  
<https://www.dermis.net/bilder/CD098/550px/img0043.jpg>  
<https://www.dermis.net/bilder/CD099/550px/img0078.jpg>  
<https://www.dermis.net/bilder/CD086/550px/img0027.jpg>  
<https://www.dermis.net/bilder/CD088/550px/img0029.jpg>  
<https://www.dermis.net/bilder/CD099/550px/img0067.jpg>  
<https://www.dermis.net/bilder/CD097/550px/img0045.jpg>  
<https://www.dermis.net/bilder/CD097/550px/img0046.jpg>



<https://www.dermis.net/bilder/CD099/550px/img0024.jpg>  
<https://www.dermis.net/bilder/CD086/550px/img0089.jpg>  
<https://www.dermis.net/bilder/CD086/550px/img0090.jpg>  
<https://www.dermis.net/bilder/CD099/550px/img0010.jpg>  
<https://www.dermis.net/bilder/CD099/550px/img0011.jpg>  
<https://www.dermis.net/bilder/CD088/550px/img0080.jpg>  
<https://www.dermis.net/bilder/CD099/550px/img0090.jpg>  
<https://www.dermis.net/bilder/CD099/550px/img0092.jpg>  
<https://www.dermis.net/bilder/CD099/550px/img0093.jpg>  
<https://www.dermis.net/bilder/CD099/550px/img0031.jpg>  
<https://www.dermis.net/bilder/CD098/550px/img0075.jpg>  
<https://www.dermis.net/bilder/CD087/550px/img0007.jpg>  
<https://www.dermis.net/bilder/CD087/550px/img0008.jpg>  
<https://www.dermis.net/bilder/CD097/550px/img0097.jpg>  
<https://www.dermis.net/bilder/CD097/550px/img0098.jpg>  
<https://www.dermis.net/bilder/CD097/550px/img0099.jpg>  
<https://www.dermis.net/bilder/CD097/550px/img0100.jpg>  
<https://www.dermis.net/bilder/CD085/550px/img0002.jpg>  
<https://www.dermis.net/bilder/CD091/550px/img0067.jpg>  
<https://www.dermis.net/bilder/CD099/550px/img0091.jpg>  
<https://www.dermis.net/bilder/CD102/550px/img0030.jpg>  
<https://www.dermis.net/bilder/CD098/550px/img0052.jpg>  
<https://www.dermis.net/bilder/CD098/550px/img0054.jpg>  
<https://www.dermis.net/bilder/CD098/550px/img0056.jpg>  
<https://www.dermis.net/bilder/CD098/550px/img0057.jpg>  
<https://www.dermis.net/bilder/CD098/550px/img0055.jpg>  
<https://www.dermis.net/bilder/CD098/550px/img0058.jpg>  
<https://www.dermis.net/bilder/CD098/550px/img0073.jpg>  
<https://www.dermis.net/bilder/CD098/550px/img0074.jpg>  
<https://www.dermis.net/bilder/CD097/550px/img0066.jpg>  
<https://www.dermis.net/bilder/CD093/550px/img0093.jpg>  
<https://www.dermis.net/bilder/CD096/550px/img0086.jpg>  
<https://www.dermis.net/bilder/CD086/550px/img0029.jpg>  
<https://www.dermis.net/bilder/CD093/550px/img0071.jpg>  
<https://www.dermis.net/bilder/CD093/550px/img0072.jpg>  
<https://www.dermis.net/bilder/CD093/550px/img0075.jpg>  
<https://www.dermis.net/bilder/CD093/550px/img0076.jpg>  
<https://www.dermis.net/bilder/CD093/550px/img0077.jpg>  
<https://www.dermis.net/bilder/CD093/550px/img0079.jpg>  
<https://www.dermis.net/bilder/CD087/550px/img0025.jpg>  
<https://www.dermis.net/bilder/CD086/550px/img0020.jpg>  
<https://www.dermis.net/bilder/CD086/550px/img0021.jpg>  
<https://www.dermis.net/bilder/CD099/550px/img0080.jpg>  
<https://www.dermis.net/bilder/CD098/550px/img0011.jpg>  
<https://www.dermis.net/bilder/CD098/550px/img0012.jpg>  
<https://www.dermis.net/bilder/CD099/550px/img0054.jpg>  
<https://www.dermis.net/bilder/CD097/550px/img0003.jpg>  
<https://www.dermis.net/bilder/CD097/550px/img0004.jpg>



<https://www.dermis.net/bilder/CD087/550px/img0050.jpg>  
<https://www.dermis.net/bilder/CD088/550px/img0062.jpg>  
<https://www.dermis.net/bilder/CD087/550px/img0048.jpg>  
<https://www.dermis.net/bilder/CD087/550px/img0049.jpg>  
<https://www.dermis.net/bilder/CD088/550px/img0061.jpg>  
<https://www.dermis.net/bilder/CD107/550px/img0043.jpg>  
<https://www.dermis.net/bilder/CD101/550px/img0091.jpg>  
<https://www.dermis.net/bilder/CD101/550px/img0092.jpg>  
<https://www.dermis.net/bilder/CD086/550px/img0085.jpg>  
<https://www.dermis.net/bilder/CD086/550px/img0060.jpg>  
<https://www.dermis.net/bilder/CD086/550px/img0061.jpg>  
<https://www.dermis.net/bilder/CD086/550px/img0062.jpg>  
<https://www.dermis.net/bilder/CD086/550px/img0064.jpg>  
<https://www.dermis.net/bilder/CD086/550px/img0065.jpg>  
<https://www.dermis.net/bilder/CD086/550px/img0091.jpg>  
<https://www.dermis.net/bilder/CD086/550px/img0092.jpg>  
<https://www.dermis.net/bilder/CD086/550px/img0093.jpg>  
<https://www.dermis.net/bilder/CD086/550px/img0094.jpg>  
<https://www.dermis.net/bilder/CD088/550px/img0055.jpg>  
<https://www.dermis.net/bilder/CD088/550px/img0056.jpg>  
<https://www.dermis.net/bilder/CD086/550px/img0033.jpg>  
<https://www.dermis.net/bilder/CD086/550px/img0034.jpg>  
<https://www.dermis.net/bilder/CD088/550px/img0037.jpg>  
<https://www.dermis.net/bilder/CD098/550px/img0002.jpg>  
<https://www.dermis.net/bilder/CD098/550px/img0003.jpg>  
<https://www.dermis.net/bilder/CD098/550px/img0004.jpg>  
<https://www.dermis.net/bilder/CD098/550px/img0005.jpg>  
<https://www.dermis.net/bilder/CD098/550px/img0006.jpg>  
<https://www.dermis.net/bilder/CD098/550px/img0042.jpg>  
<https://www.dermis.net/bilder/CD086/550px/img0086.jpg>  
<https://www.dermis.net/bilder/CD107/550px/img0023.jpg>  
<https://www.dermis.net/bilder/CD107/550px/img0024.jpg>  
<https://www.dermis.net/bilder/CD086/550px/img0057.jpg>  
<https://www.dermis.net/bilder/CD099/550px/img0068.jpg>  
<https://www.dermis.net/bilder/CD099/550px/img0069.jpg>  
<https://www.dermis.net/bilder/CD092/550px/img0037.jpg>  
<https://www.dermis.net/bilder/CD092/550px/img0038.jpg>  
<https://www.dermis.net/bilder/CD092/550px/img0005.jpg>  
<https://www.dermis.net/bilder/CD092/550px/img0025.jpg>  
<https://www.dermis.net/bilder/CD092/550px/img0034.jpg>  
<https://www.dermis.net/bilder/CD092/550px/img0021.jpg>  
<https://www.dermis.net/bilder/CD092/550px/img0036.jpg>  
<https://www.dermis.net/bilder/CD087/550px/img0038.jpg>  
<https://www.dermis.net/bilder/CD087/550px/img0039.jpg>  
<https://www.dermis.net/bilder/CD099/550px/img0073.jpg>  
<https://www.dermis.net/bilder/CD099/550px/img0074.jpg>  
<https://www.dermis.net/bilder/CD086/550px/img0046.jpg>  
<https://www.dermis.net/bilder/CD086/550px/img0047.jpg>

<https://www.dermis.net/bilder/CD098/550px/img0068.jpg>  
<https://www.dermis.net/bilder/CD093/550px/img0046.jpg>  
<https://www.dermis.net/bilder/CD097/550px/img0026.jpg>  
<https://www.dermis.net/bilder/CD097/550px/img0027.jpg>  
<https://www.dermis.net/bilder/CD097/550px/img0029.jpg>  
<https://www.dermis.net/bilder/CD087/550px/img0022.jpg>  
<https://www.dermis.net/bilder/CD087/550px/img0001.jpg>  
<https://www.dermis.net/bilder/CD087/550px/img0002.jpg>  
<https://www.dermis.net/bilder/CD087/550px/img0003.jpg>  
<https://www.dermis.net/bilder/CD107/550px/img0013.jpg>  
<https://www.dermis.net/bilder/CD088/550px/img0058.jpg>  
<https://www.dermis.net/bilder/CD086/550px/img0025.jpg>  
<https://www.dermis.net/bilder/CD086/550px/img0074.jpg>  
<https://www.dermis.net/bilder/CD098/550px/img0010.jpg>  
<https://www.dermis.net/bilder/CD098/550px/img0062.jpg>  
<https://www.dermis.net/bilder/CD098/550px/img0017.jpg>  
<https://www.dermis.net/bilder/CD086/550px/img0007.jpg>  
<https://www.dermis.net/bilder/CD098/550px/img0066.jpg>  
<https://www.dermis.net/bilder/CD106/550px/img0045.jpg>  
<https://www.dermis.net/bilder/CD086/550px/img0097.jpg>  
<https://www.dermis.net/bilder/CD099/550px/img0064.jpg>  
<https://www.dermis.net/bilder/CD097/550px/img0084.jpg>  
<https://www.dermis.net/bilder/CD086/550px/img0055.jpg>  
<https://www.dermis.net/bilder/CD097/550px/img0087.jpg>  
<https://www.dermis.net/bilder/CD097/550px/img0049.jpg>  
<https://www.dermis.net/bilder/CD097/550px/img0050.jpg>  
<https://www.dermis.net/bilder/CD093/550px/img0030.jpg>  
<https://www.dermis.net/bilder/CD093/550px/img0031.jpg>  
<https://www.dermis.net/bilder/CD093/550px/img0032.jpg>  
<https://www.dermis.net/bilder/CD093/550px/img0033.jpg>  
<https://www.dermis.net/bilder/CD098/550px/img0064.jpg>  
<https://www.dermis.net/bilder/CD099/550px/img0083.jpg>  
<https://www.dermis.net/bilder/CD086/550px/img0048.jpg>  
<https://www.dermis.net/bilder/CD098/550px/img0071.jpg>  
<https://www.dermis.net/bilder/CD089/550px/img0008.jpg>  
<https://www.dermis.net/bilder/CD086/550px/img0077.jpg>  
<https://www.dermis.net/bilder/CD093/550px/img0094.jpg>  
<https://www.dermis.net/bilder/CD093/550px/img0095.jpg>  
<https://www.dermis.net/bilder/CD089/550px/img0004.jpg>  
<https://www.dermis.net/bilder/CD097/550px/img0010.jpg>  
<https://www.dermis.net/bilder/CD088/550px/img0099.jpg>  
<https://www.dermis.net/bilder/CD099/550px/img0094.jpg>  
<https://www.dermis.net/bilder/CD099/550px/img0095.jpg>  
<https://www.dermis.net/bilder/CD099/550px/img0096.jpg>  
<https://www.dermis.net/bilder/CD088/550px/img0091.jpg>  
<https://www.dermis.net/bilder/CD088/550px/img0092.jpg>  
<https://www.dermis.net/bilder/CD097/550px/img0008.jpg>  
<https://www.dermis.net/bilder/CD097/550px/img0009.jpg>

<https://www.dermis.net/bilder/CD088/550px/img0100.jpg>  
<https://www.dermis.net/bilder/CD098/550px/img0050.jpg>  
<https://www.dermis.net/bilder/CD098/550px/img0051.jpg>  
<https://www.dermis.net/bilder/CD098/550px/img0049.jpg>  
<https://www.dermis.net/bilder/CD086/550px/img0070.jpg>  
<https://www.dermis.net/bilder/CD086/550px/img0071.jpg>  
<https://www.dermis.net/bilder/CD086/550px/img0072.jpg>  
<https://www.dermis.net/bilder/CD086/550px/img0073.jpg>  
<https://www.dermis.net/bilder/CD106/550px/img0042.jpg>  
<https://www.dermis.net/bilder/CD106/550px/img0044.jpg>  
<https://www.dermis.net/bilder/CD098/550px/img0029.jpg>  
<https://www.dermis.net/bilder/CD098/550px/img0030.jpg>  
<https://www.dermis.net/bilder/CD055/550px/img0035.jpg>  
<https://www.dermis.net/bilder/CD093/550px/img0029.jpg>  
<https://www.dermis.net/bilder/CD088/550px/img0053.jpg>  
<https://www.dermis.net/bilder/CD087/550px/img0041.jpg>  
<https://www.dermis.net/bilder/CD087/550px/img0043.jpg>  
<https://www.dermis.net/bilder/CD085/550px/img0059.jpg>  
<https://www.dermis.net/bilder/CD085/550px/img0060.jpg>  
<https://www.dermis.net/bilder/CD103/550px/img0025.jpg>  
<https://www.dermis.net/bilder/CD103/550px/img0045.jpg>  
<https://www.dermis.net/bilder/CD103/550px/img0065.jpg>  
<https://www.dermis.net/bilder/CD106/550px/img0054.jpg>  
<https://www.dermis.net/bilder/CD106/550px/img0055.jpg>  
<https://www.dermis.net/bilder/CD106/550px/img0056.jpg>  
<https://www.dermis.net/bilder/CD106/550px/img0057.jpg>  
<https://www.dermis.net/bilder/CD106/550px/img0061.jpg>  
<https://www.dermis.net/bilder/CD106/550px/img0066.jpg>  
<https://www.dermis.net/bilder/CD106/550px/img0067.jpg>  
<https://www.dermis.net/bilder/CD096/550px/img0068.jpg>  
<https://www.dermis.net/bilder/CD087/550px/img0018.jpg>  
<https://www.dermis.net/bilder/CD087/550px/img0020.jpg>  
<https://www.dermis.net/bilder/CD087/550px/img0021.jpg>  
<https://www.dermis.net/bilder/CD087/550px/img0023.jpg>  
<https://www.dermis.net/bilder/CD106/550px/img0076.jpg>  
<https://www.dermis.net/bilder/CD106/550px/img0077.jpg>  
<https://www.dermis.net/bilder/CD106/550px/img0078.jpg>  
<https://www.dermis.net/bilder/CD106/550px/img0079.jpg>  
<https://www.dermis.net/bilder/CD106/550px/img0080.jpg>  
<https://www.dermis.net/bilder/CD107/550px/img0020.jpg>  
<https://www.dermis.net/bilder/CD086/550px/img0031.jpg>  
<https://www.dermis.net/bilder/CD088/550px/img0030.jpg>  
<https://www.dermis.net/bilder/CD086/550px/img0011.jpg>  
<https://www.dermis.net/bilder/CD099/550px/img0071.jpg>  
<https://www.dermis.net/bilder/CD099/550px/img0072.jpg>  
<https://www.dermis.net/bilder/CD106/550px/img0025.jpg>  
<https://www.dermis.net/bilder/CD106/550px/img0026.jpg>  
<https://www.dermis.net/bilder/CD106/550px/img0027.jpg>

<https://www.dermis.net/bilder/CD110/550px/img0082.jpg>  
<https://www.dermis.net/bilder/CD087/550px/img0032.jpg>  
<https://www.dermis.net/bilder/CD087/550px/img0033.jpg>  
<https://www.dermis.net/bilder/CD087/550px/img0034.jpg>  
<https://www.dermis.net/bilder/CD087/550px/img0035.jpg>  
<https://www.dermis.net/bilder/CD086/550px/img0026.jpg>  
<https://www.dermis.net/bilder/CD086/550px/img0028.jpg>  
<https://www.dermis.net/bilder/CD088/550px/img0088.jpg>  
<https://www.dermis.net/bilder/CD088/550px/img0090.jpg>  
<https://www.dermis.net/bilder/CD086/550px/img0075.jpg>  
<https://www.dermis.net/bilder/CD088/550px/img0005.jpg>  
<https://www.dermis.net/bilder/CD086/550px/img0008.jpg>  
<https://www.dermis.net/bilder/CD086/550px/img0009.jpg>  
<https://www.dermis.net/bilder/CD086/550px/img0010.jpg>  
<https://www.dermis.net/bilder/CD089/550px/img0010.jpg>  
<https://www.dermis.net/bilder/CD089/550px/img0011.jpg>  
<https://www.dermis.net/bilder/CD089/550px/img0012.jpg>  
<https://www.dermis.net/bilder/CD106/550px/img0053.jpg>  
<https://www.dermis.net/bilder/CD106/550px/img0028.jpg>  
<https://www.dermis.net/bilder/CD085/550px/img0036.jpg>  
<https://www.dermis.net/bilder/CD086/550px/img0098.jpg>  
<https://www.dermis.net/bilder/CD087/550px/img0055.jpg>  
<https://www.dermis.net/bilder/CD107/550px/img0031.jpg>  
<https://www.dermis.net/bilder/CD096/550px/img0070.jpg>  
<https://www.dermis.net/bilder/CD093/550px/img0023.jpg>  
<https://www.dermis.net/bilder/CD107/550px/img0027.jpg>  
<https://www.dermis.net/bilder/CD086/550px/img0066.jpg>  
<https://www.dermis.net/bilder/CD086/550px/img0067.jpg>  
<https://www.dermis.net/bilder/CD086/550px/img0068.jpg>  
<https://www.dermis.net/bilder/CD086/550px/img0069.jpg>  
<https://www.dermis.net/bilder/CD088/550px/img0015.jpg>  
<https://www.dermis.net/bilder/CD088/550px/img0016.jpg>  
<https://www.dermis.net/bilder/CD088/550px/img0017.jpg>  
<https://www.dermis.net/bilder/CD088/550px/img0018.jpg>  
<https://www.dermis.net/bilder/CD087/550px/img0006.jpg>  
<https://www.dermis.net/bilder/CD098/550px/img0001.jpg>  
<https://www.dermis.net/bilder/CD091/550px/img0060.jpg>  
<https://www.dermis.net/bilder/CD091/550px/img0061.jpg>  
<https://www.dermis.net/bilder/CD093/550px/img0034.jpg>  
<https://www.dermis.net/bilder/CD093/550px/img0035.jpg>  
<https://www.dermis.net/bilder/CD093/550px/img0036.jpg>  
<https://www.dermis.net/bilder/CD093/550px/img0037.jpg>  
<https://www.dermis.net/bilder/CD093/550px/img0039.jpg>  
<https://www.dermis.net/bilder/CD097/550px/img0048.jpg>  
<https://www.dermis.net/bilder/CD098/550px/img0065.jpg>  
<https://www.dermis.net/bilder/CD089/550px/img0002.jpg>  
<https://www.dermis.net/bilder/CD089/550px/img0003.jpg>  
<https://www.dermis.net/bilder/CD097/550px/img0067.jpg>

<https://www.dermis.net/bilder/CD107/550px/img0017.jpg>  
<https://www.dermis.net/bilder/CD106/550px/img0092.jpg>  
<https://www.dermis.net/bilder/CD106/550px/img0093.jpg>  
<https://www.dermis.net/bilder/CD089/550px/img0005.jpg>  
<https://www.dermis.net/bilder/CD089/550px/img0006.jpg>  
<https://www.dermis.net/bilder/CD089/550px/img0007.jpg>  
<https://www.dermis.net/bilder/CD086/550px/img0095.jpg>  
<https://www.dermis.net/bilder/CD093/550px/img0069.jpg>  
<https://www.dermis.net/bilder/CD093/550px/img0070.jpg>  
<https://www.dermis.net/bilder/CD093/550px/img0055.jpg>  
<https://www.dermis.net/bilder/CD093/550px/img0061.jpg>  
<https://www.dermis.net/bilder/CD093/550px/img0062.jpg>  
<https://www.dermis.net/bilder/CD106/550px/img0004.jpg>  
<https://www.dermis.net/bilder/CD106/550px/img0005.jpg>  
<https://www.dermis.net/bilder/CD106/550px/img0018.jpg>  
<https://www.dermis.net/bilder/CD106/550px/img0019.jpg>  
<https://www.dermis.net/bilder/CD106/550px/img0002.jpg>  
<https://www.dermis.net/bilder/CD106/550px/img0006.jpg>  
<https://www.dermis.net/bilder/CD106/550px/img0021.jpg>  
<https://www.dermis.net/bilder/CD087/550px/img0024.jpg>  
<https://www.dermis.net/bilder/CD093/550px/img0083.jpg>  
<https://www.dermis.net/bilder/CD093/550px/img0084.jpg>  
<https://www.dermis.net/bilder/CD093/550px/img0085.jpg>  
<https://www.dermis.net/bilder/CD093/550px/img0086.jpg>  
<https://www.dermis.net/bilder/CD087/550px/img0031.jpg>  
<https://www.dermis.net/bilder/CD086/550px/img0024.jpg>  
<https://www.dermis.net/bilder/CD087/550px/img0004.jpg>  
<https://www.dermis.net/bilder/CD087/550px/img0005.jpg>  
<https://www.dermis.net/bilder/CD099/550px/img0079.jpg>  
<https://www.dermis.net/bilder/CD087/550px/img0047.jpg>  
<https://www.dermis.net/bilder/CD107/550px/img0044.jpg>  
<https://www.dermis.net/bilder/CD107/550px/img0045.jpg>  
<https://www.dermis.net/bilder/CD107/550px/img0048.jpg>  
<https://www.dermis.net/bilder/CD107/550px/img0050.jpg>  
<https://www.dermis.net/bilder/CD107/550px/img0051.jpg>  
<https://www.dermis.net/bilder/CD107/550px/img0053.jpg>  
<https://www.dermis.net/bilder/CD093/550px/img0028.jpg>  
<https://www.dermis.net/bilder/CD086/550px/img0063.jpg>  
<https://www.dermis.net/bilder/CD097/550px/img0059.jpg>  
<https://www.dermis.net/bilder/CD097/550px/img0060.jpg>  
<https://www.dermis.net/bilder/CD088/550px/img0054.jpg>  
<https://www.dermis.net/bilder/CD098/550px/img0007.jpg>  
<https://www.dermis.net/bilder/CD088/550px/img0052.jpg>  
<https://www.dermis.net/bilder/CD106/550px/img0034.jpg>  
<https://www.dermis.net/bilder/CD106/550px/img0035.jpg>  
<https://www.dermis.net/bilder/CD106/550px/img0037.jpg>  
<https://www.dermis.net/bilder/CD106/550px/img0038.jpg>  
<https://www.dermis.net/bilder/CD106/550px/img0040.jpg>

<https://www.dermis.net/bilder/CD106/550px/img0041.jpg>  
<https://www.dermis.net/bilder/CD106/550px/img0046.jpg>  
<https://www.dermis.net/bilder/CD106/550px/img0048.jpg>  
<https://www.dermis.net/bilder/CD086/550px/img0058.jpg>  
<https://www.dermis.net/bilder/CD086/550px/img0059.jpg>  
<https://www.dermis.net/bilder/CD056/550px/img0017.jpg>  
<https://www.dermis.net/bilder/CD057/550px/img0070.jpg>  
<https://www.dermis.net/bilder/CD057/550px/img0071.jpg>  
<https://www.dermis.net/bilder/CD079/550px/img0015.jpg>  
<https://www.dermis.net/bilder/CD079/550px/img0016.jpg>  
<https://www.dermis.net/bilder/CD079/550px/img0017.jpg>  
<https://www.dermis.net/bilder/CD150/550px/img0070.jpg>  
<https://www.dermis.net/bilder/CD150/550px/img0072.jpg>  
<https://www.dermis.net/bilder/CD150/550px/img0073.jpg>  
<https://www.dermis.net/bilder/CD076/550px/img0066.jpg>  
<https://www.dermis.net/bilder/CD079/550px/img0041.jpg>  
<https://www.dermis.net/bilder/CD079/550px/img0042.jpg>  
<https://www.dermis.net/bilder/CD079/550px/img0043.jpg>  
<https://www.dermis.net/bilder/CD079/550px/img0045.jpg>  
<https://www.dermis.net/bilder/CD077/550px/img0029.jpg>  
<https://www.dermis.net/bilder/CD077/550px/img0030.jpg>  
<https://www.dermis.net/bilder/CD077/550px/img0031.jpg>  
<https://www.dermis.net/bilder/CD077/550px/img0009.jpg>  
<https://www.dermis.net/bilder/CD077/550px/img0010.jpg>  
<https://www.dermis.net/bilder/CD077/550px/img0014.jpg>  
<https://www.dermis.net/bilder/CD078/550px/img0079.jpg>  
<https://www.dermis.net/bilder/CD078/550px/img0081.jpg>  
<https://www.dermis.net/bilder/CD152/550px/img0057.jpg>  
<https://www.dermis.net/bilder/CD152/550px/img0060.jpg>  
<https://www.dermis.net/bilder/CD078/550px/img0047.jpg>  
<https://www.dermis.net/bilder/CD078/550px/img0048.jpg>  
<https://www.dermis.net/bilder/CD078/550px/img0049.jpg>  
<https://www.dermis.net/bilder/CD150/550px/img0018.jpg>  
<https://www.dermis.net/bilder/CD150/550px/img0019.jpg>  
<https://www.dermis.net/bilder/CD150/550px/img0021.jpg>  
<https://www.dermis.net/bilder/CD055/550px/img0038.jpg>  
<https://www.dermis.net/bilder/CD150/550px/img0063.jpg>  
<https://www.dermis.net/bilder/CD152/550px/img0070.jpg>  
<https://www.dermis.net/bilder/CD153/550px/img0005.jpg>  
<https://www.dermis.net/bilder/CD154/550px/img0099.jpg>  
<https://www.dermis.net/bilder/CD184/550px/img0003.jpg>  
<https://www.dermis.net/bilder/CD076/550px/img0076.jpg>  
<https://www.dermis.net/bilder/CD078/550px/img0061.jpg>  
<https://www.dermis.net/bilder/CD078/550px/img0092.jpg>  
<https://www.dermis.net/bilder/CD055/550px/img0012.jpg>  
<https://www.dermis.net/bilder/CD077/550px/img0098.jpg>  
<https://www.dermis.net/bilder/CD077/550px/img0100.jpg>  
<https://www.dermis.net/bilder/CD078/550px/img0068.jpg>

<https://www.dermis.net/bilder/CD052/550px/img0096.jpg>  
<https://www.dermis.net/bilder/CD153/550px/img0063.jpg>  
<https://www.dermis.net/bilder/CD153/550px/img0064.jpg>  
<https://www.dermis.net/bilder/CD153/550px/img0065.jpg>  
<https://www.dermis.net/bilder/CD153/550px/img0066.jpg>  
<https://www.dermis.net/bilder/CD033/550px/img0036.jpg>  
<https://www.dermis.net/bilder/CD003/550px/img0063.jpg>  
<https://www.dermis.net/bilder/CD003/550px/img0070.jpg>  
<https://www.dermis.net/bilder/CD003/550px/img0071.jpg>  
<https://www.dermis.net/bilder/CD003/550px/img0072.jpg>  
<https://www.dermis.net/bilder/CD017/550px/img0038.jpg>  
<https://www.dermis.net/bilder/CD077/550px/img0058.jpg>  
<https://www.dermis.net/bilder/CD077/550px/img0059.jpg>  
<https://www.dermis.net/bilder/CD079/550px/img0008.jpg>  
<https://www.dermis.net/bilder/CD079/550px/img0009.jpg>  
<https://www.dermis.net/bilder/CD079/550px/img0010.jpg>  
<https://www.dermis.net/bilder/CD151/550px/img0086.jpg>  
<https://www.dermis.net/bilder/CD151/550px/img0088.jpg>  
<https://www.dermis.net/bilder/CD152/550px/img0076.jpg>  
<https://www.dermis.net/bilder/CD152/550px/img0077.jpg>  
<https://www.dermis.net/bilder/CD152/550px/img0078.jpg>  
<https://www.dermis.net/bilder/CD152/550px/img0080.jpg>  
<https://www.dermis.net/bilder/CD152/550px/img0081.jpg>  
<https://www.dermis.net/bilder/CD079/550px/img0064.jpg>  
<https://www.dermis.net/bilder/CD029/550px/img0010.jpg>  
<https://www.dermis.net/bilder/CD152/550px/img0001.jpg>  
<https://www.dermis.net/bilder/CD056/550px/img0091.jpg>  
<https://www.dermis.net/bilder/CD085/550px/img0061.jpg>  
<https://www.dermis.net/bilder/CD085/550px/img0062.jpg>  
<https://www.dermis.net/bilder/CD085/550px/img0063.jpg>  
<https://www.dermis.net/bilder/CD055/550px/img0055.jpg>  
<https://www.dermis.net/bilder/CD001/550px/img0015.jpg>  
<https://www.dermis.net/bilder/CD001/550px/img0063.jpg>  
<https://www.dermis.net/bilder/CD001/550px/img0087.jpg>  
<https://www.dermis.net/bilder/CD001/550px/img0098.jpg>  
<https://www.dermis.net/bilder/CD076/550px/img0107.jpg>  
<https://www.dermis.net/bilder/CD076/550px/img0108.jpg>  
<https://www.dermis.net/bilder/CD153/550px/img0007.jpg>  
<https://www.dermis.net/bilder/CD153/550px/img0008.jpg>  
<https://www.dermis.net/bilder/CD153/550px/img0009.jpg>  
<https://www.dermis.net/bilder/CD153/550px/img0010.jpg>  
<https://www.dermis.net/bilder/CD153/550px/img0019.jpg>  
<https://www.dermis.net/bilder/CD153/550px/img0020.jpg>  
<https://www.dermis.net/bilder/CD153/550px/img0021.jpg>  
<https://www.dermis.net/bilder/CD078/550px/img0078.jpg>  
<https://www.dermis.net/bilder/CD079/550px/img0046.jpg>  
<https://www.dermis.net/bilder/CD079/550px/img0095.jpg>  
<https://www.dermis.net/bilder/CD151/550px/img0048.jpg>

<https://www.dermis.net/bilder/CD035/550px/img0028.jpg>  
<https://www.dermis.net/bilder/CD076/550px/img0058.jpg>  
<https://www.dermis.net/bilder/CD078/550px/img0026.jpg>  
<https://www.dermis.net/bilder/CD079/550px/img0047.jpg>  
<https://www.dermis.net/bilder/CD153/550px/img0049.jpg>  
<https://www.dermis.net/bilder/CD061/550px/img0004.jpg>  
<https://www.dermis.net/bilder/CD061/550px/img0005.jpg>  
<https://www.dermis.net/bilder/CD178/550px/img0010.jpg>  
<https://www.dermis.net/bilder/CD189/550px/img0112.jpg>  
<https://www.dermis.net/bilder/CD187/550px/img0022.jpg>  
<https://www.dermis.net/bilder/CD191/550px/img0083.jpg>  
<https://www.dermis.net/bilder/CD191/550px/img0084.jpg>  
<https://www.dermis.net/bilder/CD212/550px/img0083.jpg>  
<https://www.dermis.net/bilder/CD033/550px/img0014.jpg>  
<https://www.dermis.net/bilder/CD152/550px/img0010.jpg>  
<https://www.dermis.net/bilder/CD152/550px/img0012.jpg>  
<https://www.dermis.net/bilder/CD152/550px/img0013.jpg>  
<https://www.dermis.net/bilder/CD152/550px/img0014.jpg>  
<https://www.dermis.net/bilder/CD154/550px/img0020.jpg>  
<https://www.dermis.net/bilder/CD079/550px/img0048.jpg>  
<https://www.dermis.net/bilder/CD151/550px/img0103.jpg>  
<https://www.dermis.net/bilder/CD077/550px/img0003.jpg>  
<https://www.dermis.net/bilder/CD077/550px/img0004.jpg>  
<https://www.dermis.net/bilder/CD150/550px/img0013.jpg>  
<https://www.dermis.net/bilder/CD058/550px/img0095.jpg>  
<https://www.dermis.net/bilder/CD077/550px/img0001.jpg>  
<https://www.dermis.net/bilder/CD153/550px/img0053.jpg>  
<https://www.dermis.net/bilder/CD078/550px/img0025.jpg>  
<https://www.dermis.net/bilder/CD079/550px/img0011.jpg>  
<https://www.dermis.net/bilder/CD079/550px/img0012.jpg>  
<https://www.dermis.net/bilder/CD008/550px/img0047.jpg>  
<https://www.dermis.net/bilder/CD078/550px/img0072.jpg>  
<https://www.dermis.net/bilder/CD078/550px/img0073.jpg>  
<https://www.dermis.net/bilder/CD078/550px/img0074.jpg>  
<https://www.dermis.net/bilder/CD078/550px/img0075.jpg>  
<https://www.dermis.net/bilder/CD078/550px/img0076.jpg>  
<https://www.dermis.net/bilder/CD150/550px/img0038.jpg>  
<https://www.dermis.net/bilder/CD150/550px/img0039.jpg>  
<https://www.dermis.net/bilder/CD150/550px/img0040.jpg>  
<https://www.dermis.net/bilder/CD150/550px/img0041.jpg>  
<https://www.dermis.net/bilder/CD151/550px/img0050.jpg>  
<https://www.dermis.net/bilder/CD151/550px/img0051.jpg>  
<https://www.dermis.net/bilder/CD151/550px/img0052.jpg>  
<https://www.dermis.net/bilder/CD152/550px/img0071.jpg>  
<https://www.dermis.net/bilder/CD152/550px/img0074.jpg>  
<https://www.dermis.net/bilder/CD152/550px/img0075.jpg>  
<https://www.dermis.net/bilder/CD056/550px/img0028.jpg>  
<https://www.dermis.net/bilder/CD056/550px/img0029.jpg>



<https://www.dermis.net/bilder/CD056/550px/img0065.jpg>  
<https://www.dermis.net/bilder/CD154/550px/img0055.jpg>  
<https://www.dermis.net/bilder/CD015/550px/img0019.jpg>  
<https://www.dermis.net/bilder/CD050/550px/img0040.jpg>  
<https://www.dermis.net/bilder/CD154/550px/img0100.jpg>  
<https://www.dermis.net/bilder/CD150/550px/img0074.jpg>  
<https://www.dermis.net/bilder/CD150/550px/img0075.jpg>  
<https://www.dermis.net/bilder/CD002/550px/img0010.jpg>  
<https://www.dermis.net/bilder/CD076/550px/img0075.jpg>  
<https://www.dermis.net/bilder/CD036/550px/img0016.jpg>  
<https://www.dermis.net/bilder/CD191/550px/img0072.jpg>  
<https://www.dermis.net/bilder/CD191/550px/img0073.jpg>  
<https://www.dermis.net/bilder/CD154/550px/img0062.jpg>  
<https://www.dermis.net/bilder/CD154/550px/img0063.jpg>  
<https://www.dermis.net/bilder/CD154/550px/img0064.jpg>  
<https://www.dermis.net/bilder/CD154/550px/img0065.jpg>  
<https://www.dermis.net/bilder/CD058/550px/img0094.jpg>  
<https://www.dermis.net/bilder/CD001/550px/img0070.jpg>  
<https://www.dermis.net/bilder/CD153/550px/img0077.jpg>  
<https://www.dermis.net/bilder/CD153/550px/img0078.jpg>  
<https://www.dermis.net/bilder/CD085/550px/img0076.jpg>  
<https://www.dermis.net/bilder/CD085/550px/img0077.jpg>  
<https://www.dermis.net/bilder/CD088/550px/img0007.jpg>  
<https://www.dermis.net/bilder/CD106/550px/img0051.jpg>  
<https://www.dermis.net/bilder/CD106/550px/img0052.jpg>  
<https://www.dermis.net/bilder/CD110/550px/img0025.jpg>  
<https://www.dermis.net/bilder/CD079/550px/img0070.jpg>  
<https://www.dermis.net/bilder/CD076/550px/img0031.jpg>  
<https://www.dermis.net/bilder/CD076/550px/img0032.jpg>  
<https://www.dermis.net/bilder/CD076/550px/img0044.jpg>  
<https://www.dermis.net/bilder/CD150/550px/img0101.jpg>  
<https://www.dermis.net/bilder/CD192/550px/img0029.jpg>  
<https://www.dermis.net/bilder/CD060/550px/img0008.jpg>  
<https://www.dermis.net/bilder/CD060/550px/img0009.jpg>  
<https://www.dermis.net/bilder/CD061/550px/img0006.jpg>  
<https://www.dermis.net/bilder/CD041/550px/img0094.jpg>  
<https://www.dermis.net/bilder/CD084/550px/img0095.jpg>  
<https://www.dermis.net/bilder/CD005/550px/img0059.jpg>  
<https://www.dermis.net/bilder/CD185/550px/img0019.jpg>  
<https://www.dermis.net/bilder/CD185/550px/img0020.jpg>  
<https://www.dermis.net/bilder/CD033/550px/img0033.jpg>  
<https://www.dermis.net/bilder/CD033/550px/img0034.jpg>  
<https://www.dermis.net/bilder/CD008/550px/img0001.jpg>  
<https://www.dermis.net/bilder/CD078/550px/img0062.jpg>  
<https://www.dermis.net/bilder/CD078/550px/img0063.jpg>  
<https://www.dermis.net/bilder/CD152/550px/img0100.jpg>  
<https://www.dermis.net/bilder/CD042/550px/img0009.jpg>  
<https://www.dermis.net/bilder/CD040/550px/img0062.jpg>

<https://www.dermis.net/bilder/CD040/550px/img0064.jpg>  
<https://www.dermis.net/bilder/CD079/550px/img0089.jpg>  
<https://www.dermis.net/bilder/CD079/550px/img0090.jpg>  
<https://www.dermis.net/bilder/CD004/550px/img0055.jpg>  
<https://www.dermis.net/bilder/CD153/550px/img0030.jpg>  
<https://www.dermis.net/bilder/CD056/550px/img0035.jpg>  
<https://www.dermis.net/bilder/CD077/550px/img0041.jpg>  
<https://www.dermis.net/bilder/CD077/550px/img0042.jpg>  
<https://www.dermis.net/bilder/CD077/550px/img0044.jpg>  
<https://www.dermis.net/bilder/CD151/550px/img0026.jpg>  
<https://www.dermis.net/bilder/CD151/550px/img0027.jpg>  
<https://www.dermis.net/bilder/CD153/550px/img0041.jpg>  
<https://www.dermis.net/bilder/CD153/550px/img0042.jpg>  
<https://www.dermis.net/bilder/CD153/550px/img0043.jpg>  
<https://www.dermis.net/bilder/CD153/550px/img0046.jpg>  
<https://www.dermis.net/bilder/CD032/550px/img0003.jpg>  
<https://www.dermis.net/bilder/CD032/550px/img0004.jpg>  
<https://www.dermis.net/bilder/CD078/550px/img0003.jpg>  
<https://www.dermis.net/bilder/CD078/550px/img0058.jpg>  
<https://www.dermis.net/bilder/CD078/550px/img0059.jpg>  
<https://www.dermis.net/bilder/CD079/550px/img0093.jpg>  
<https://www.dermis.net/bilder/CD150/550px/img0009.jpg>  
<https://www.dermis.net/bilder/CD056/550px/img0002.jpg>  
<https://www.dermis.net/bilder/CD013/550px/img0028.jpg>  
<https://www.dermis.net/bilder/CD154/550px/img0012.jpg>  
<https://www.dermis.net/bilder/CD154/550px/img0013.jpg>  
<https://www.dermis.net/bilder/CD035/550px/img0073.jpg>  
<https://www.dermis.net/bilder/CD061/550px/img0001.jpg>  
<https://www.dermis.net/bilder/CD064/550px/img0001.jpg>  
<https://www.dermis.net/bilder/CD064/550px/img0025.jpg>  
<https://www.dermis.net/bilder/CD064/550px/img0026.jpg>  
<https://www.dermis.net/bilder/CD064/550px/img0027.jpg>  
<https://www.dermis.net/bilder/CD064/550px/img0028.jpg>  
<https://www.dermis.net/bilder/CD064/550px/img0029.jpg>  
<https://www.dermis.net/bilder/CD064/550px/img0030.jpg>  
<https://www.dermis.net/bilder/CD064/550px/img0031.jpg>  
<https://www.dermis.net/bilder/CD064/550px/img0032.jpg>  
<https://www.dermis.net/bilder/CD064/550px/img0033.jpg>  
<https://www.dermis.net/bilder/CD064/550px/img0034.jpg>  
<https://www.dermis.net/bilder/CD064/550px/img0035.jpg>  
<https://www.dermis.net/bilder/CD064/550px/img0036.jpg>  
<https://www.dermis.net/bilder/CD064/550px/img0037.jpg>  
<https://www.dermis.net/bilder/CD064/550px/img0038.jpg>  
<https://www.dermis.net/bilder/CD064/550px/img0039.jpg>  
<https://www.dermis.net/bilder/CD064/550px/img0040.jpg>  
<https://www.dermis.net/bilder/CD064/550px/img0041.jpg>  
<https://www.dermis.net/bilder/CD064/550px/img0042.jpg>  
<https://www.dermis.net/bilder/CD064/550px/img0043.jpg>

<https://www.dermis.net/bilder/CD064/550px/img0044.jpg>  
<https://www.dermis.net/bilder/CD064/550px/img0046.jpg>  
<https://www.dermis.net/bilder/CD077/550px/img0025.jpg>  
<https://www.dermis.net/bilder/CD077/550px/img0026.jpg>  
<https://www.dermis.net/bilder/CD077/550px/img0027.jpg>  
<https://www.dermis.net/bilder/CD079/550px/img0059.jpg>  
<https://www.dermis.net/bilder/CD040/550px/img0053.jpg>  
<https://www.dermis.net/bilder/CD040/550px/img0060.jpg>  
<https://www.dermis.net/bilder/CD151/550px/img0098.jpg>  
<https://www.dermis.net/bilder/CD151/550px/img0099.jpg>  
<https://www.dermis.net/bilder/CD154/550px/img0059.jpg>  
<https://www.dermis.net/bilder/CD154/550px/img0060.jpg>  
<https://www.dermis.net/bilder/CD154/550px/img0061.jpg>  
<https://www.dermis.net/bilder/CD055/550px/img0017.jpg>  
<https://www.dermis.net/bilder/CD016/550px/img0063.jpg>  
<https://www.dermis.net/bilder/CD079/550px/img0082.jpg>  
<https://www.dermis.net/bilder/CD021/550px/img0012.jpg>  
<https://www.dermis.net/bilder/CD021/550px/img0015.jpg>  
<https://www.dermis.net/bilder/CD078/550px/img0001.jpg>  
<https://www.dermis.net/bilder/CD076/550px/img0046.jpg>  
<https://www.dermis.net/bilder/CD076/550px/img0047.jpg>  
<https://www.dermis.net/bilder/CD078/550px/img0053.jpg>  
<https://www.dermis.net/bilder/CD078/550px/img0055.jpg>  
<https://www.dermis.net/bilder/CD078/550px/img0056.jpg>  
<https://www.dermis.net/bilder/CD150/550px/img0025.jpg>  
<https://www.dermis.net/bilder/CD150/550px/img0026.jpg>  
<https://www.dermis.net/bilder/CD018/550px/img0027.jpg>  
<https://www.dermis.net/bilder/CD018/550px/img0028.jpg>  
<https://www.dermis.net/bilder/CD153/550px/img0038.jpg>  
<https://www.dermis.net/bilder/CD056/550px/img0046.jpg>  
<https://www.dermis.net/bilder/CD055/550px/img0008.jpg>  
<https://www.dermis.net/bilder/CD079/550px/img0087.jpg>  
<https://www.dermis.net/bilder/CD085/550px/img0013.jpg>  
<https://www.dermis.net/bilder/CD152/550px/img0017.jpg>  
<https://www.dermis.net/bilder/CD153/550px/img0025.jpg>  
<https://www.dermis.net/bilder/CD153/550px/img0026.jpg>  
<https://www.dermis.net/bilder/CD154/550px/img0016.jpg>  
<https://www.dermis.net/bilder/CD085/550px/img0021.jpg>  
<https://www.dermis.net/bilder/CD079/550px/img0065.jpg>  
<https://www.dermis.net/bilder/CD079/550px/img0066.jpg>  
<https://www.dermis.net/bilder/CD079/550px/img0058.jpg>  
<https://www.dermis.net/bilder/CD151/550px/img0062.jpg>  
<https://www.dermis.net/bilder/CD151/550px/img0105.jpg>  
<https://www.dermis.net/bilder/CD153/550px/img0061.jpg>  
<https://www.dermis.net/bilder/CD151/550px/img0025.jpg>  
<https://www.dermis.net/bilder/CD025/550px/img0006.jpg>  
<https://www.dermis.net/bilder/CD150/550px/img0017.jpg>  
<https://www.dermis.net/bilder/CD151/550px/img0090.jpg>

<https://www.dermis.net/bilder/CD079/550px/img0029.jpg>  
<https://www.dermis.net/bilder/CD079/550px/img0030.jpg>  
<https://www.dermis.net/bilder/CD079/550px/img0031.jpg>  
<https://www.dermis.net/bilder/CD079/550px/img0032.jpg>  
<https://www.dermis.net/bilder/CD012/550px/img0025.jpg>  
<https://www.dermis.net/bilder/CD054/550px/img0028.jpg>  
<https://www.dermis.net/bilder/CD073/550px/img0025.jpg>  
<https://www.dermis.net/bilder/CD073/550px/img0026.jpg>  
<https://www.dermis.net/bilder/CD073/550px/img0027.jpg>  
<https://www.dermis.net/bilder/CD073/550px/img0028.jpg>  
<https://www.dermis.net/bilder/CD073/550px/img0029.jpg>  
<https://www.dermis.net/bilder/CD154/550px/img0015.jpg>  
<https://www.dermis.net/bilder/CD008/550px/img0081.jpg>  
<https://www.dermis.net/bilder/CD197/550px/img0044.jpg>  
<https://www.dermis.net/bilder/CD001/550px/img0075.jpg>  
<https://www.dermis.net/bilder/CD001/550px/img0076.jpg>  
<https://www.dermis.net/bilder/CD151/550px/img0044.jpg>  
<https://www.dermis.net/bilder/CD151/550px/img0047.jpg>  
<https://www.dermis.net/bilder/CD154/550px/img0023.jpg>  
<https://www.dermis.net/bilder/CD154/550px/img0030.jpg>  
<https://www.dermis.net/bilder/CD039/550px/img0011.jpg>  
<https://www.dermis.net/bilder/CD039/550px/img0012.jpg>  
<https://www.dermis.net/bilder/CD078/550px/img0035.jpg>  
<https://www.dermis.net/bilder/CD078/550px/img0036.jpg>  
<https://www.dermis.net/bilder/CD150/550px/img0024.jpg>  
<https://www.dermis.net/bilder/CD178/550px/img0060.jpg>  
<https://www.dermis.net/bilder/CD006/550px/img0032.jpg>  
<https://www.dermis.net/bilder/CD059/550px/img0081.jpg>  
<https://www.dermis.net/bilder/CD154/550px/img0019.jpg>  
<https://www.dermis.net/bilder/CD154/550px/img0081.jpg>  
<https://www.dermis.net/bilder/CD055/550px/img0053.jpg>  
<https://www.dermis.net/bilder/CD013/550px/img0015.jpg>  
<https://www.dermis.net/bilder/CD011/550px/img0065.jpg>  
<https://www.dermis.net/bilder/CD011/550px/img0066.jpg>  
<https://www.dermis.net/bilder/CD197/550px/img0043.jpg>  
<https://www.dermis.net/bilder/CD055/550px/img0051.jpg>  
<https://www.dermis.net/bilder/CD151/550px/img0112.jpg>  
<https://www.dermis.net/bilder/CD151/550px/img0113.jpg>  
<https://www.dermis.net/bilder/CD151/550px/img0114.jpg>  
<https://www.dermis.net/bilder/CD151/550px/img0115.jpg>  
<https://www.dermis.net/bilder/CD151/550px/img0116.jpg>  
<https://www.dermis.net/bilder/CD192/550px/img0093.jpg>  
<https://www.dermis.net/bilder/CD192/550px/img0092.jpg>  
<https://www.dermis.net/bilder/CD055/550px/img0070.jpg>  
<https://www.dermis.net/bilder/CD076/550px/img0090.jpg>  
<https://www.dermis.net/bilder/CD077/550px/img0090.jpg>  
<https://www.dermis.net/bilder/CD151/550px/img0017.jpg>  
<https://www.dermis.net/bilder/CD154/550px/img0098.jpg>

<https://www.dermis.net/bilder/CD150/550px/img0086.jpg>  
<https://www.dermis.net/bilder/CD150/550px/img0091.jpg>  
<https://www.dermis.net/bilder/CD154/550px/img0097.jpg>  
<https://www.dermis.net/bilder/CD150/550px/img0011.jpg>  
<https://www.dermis.net/bilder/CD150/550px/img0087.jpg>  
<https://www.dermis.net/bilder/CD151/550px/img0011.jpg>  
<https://www.dermis.net/bilder/CD151/550px/img0012.jpg>  
<https://www.dermis.net/bilder/CD040/550px/img0043.jpg>  
<https://www.dermis.net/bilder/CD077/550px/img0088.jpg>  
<https://www.dermis.net/bilder/CD151/550px/img0015.jpg>  
<https://www.dermis.net/bilder/CD032/550px/img0083.jpg>  
<https://www.dermis.net/bilder/CD041/550px/img0018.jpg>  
<https://www.dermis.net/bilder/CD041/550px/img0019.jpg>  
<https://www.dermis.net/bilder/CD076/550px/img0110.jpg>  
<https://www.dermis.net/bilder/CD076/550px/img0111.jpg>  
<https://www.dermis.net/bilder/CD076/550px/img0112.jpg>  
<https://www.dermis.net/bilder/CD150/550px/img0007.jpg>  
<https://www.dermis.net/bilder/CD150/550px/img0008.jpg>  
<https://www.dermis.net/bilder/CD151/550px/img0020.jpg>  
<https://www.dermis.net/bilder/CD151/550px/img0021.jpg>  
<https://www.dermis.net/bilder/CD151/550px/img0022.jpg>  
<https://www.dermis.net/bilder/CD187/550px/img0059.jpg>  
<https://www.dermis.net/bilder/CD078/550px/img0095.jpg>  
<https://www.dermis.net/bilder/CD152/550px/img0029.jpg>  
<https://www.dermis.net/bilder/CD056/550px/img0059.jpg>  
<https://www.dermis.net/bilder/CD154/550px/img0003.jpg>  
<https://www.dermis.net/bilder/CD154/550px/img0004.jpg>  
<https://www.dermis.net/bilder/CD077/550px/img0072.jpg>  
<https://www.dermis.net/bilder/CD012/550px/img0006.jpg>  
<https://www.dermis.net/bilder/CD012/550px/img0018.jpg>  
<https://www.dermis.net/bilder/CD012/550px/img0019.jpg>  
<https://www.dermis.net/bilder/CD021/550px/img0096.jpg>  
<https://www.dermis.net/bilder/CD192/550px/img0007.jpg>  
<https://www.dermis.net/bilder/CD192/550px/img0008.jpg>  
<https://www.dermis.net/bilder/CD042/550px/img0049.jpg>  
<https://www.dermis.net/bilder/CD152/550px/img0023.jpg>  
<https://www.dermis.net/bilder/CD079/550px/img0076.jpg>  
<https://www.dermis.net/bilder/CD153/550px/img0070.jpg>  
<https://www.dermis.net/bilder/CD011/550px/img0050.jpg>  
<https://www.dermis.net/bilder/CD011/550px/img0051.jpg>  
<https://www.dermis.net/bilder/CD011/550px/img0052.jpg>  
<https://www.dermis.net/bilder/CD011/550px/img0053.jpg>  
<https://www.dermis.net/bilder/CD076/550px/img0067.jpg>  
<https://www.dermis.net/bilder/CD076/550px/img0068.jpg>  
<https://www.dermis.net/bilder/CD076/550px/img0069.jpg>  
<https://www.dermis.net/bilder/CD008/550px/img0084.jpg>  
<https://www.dermis.net/bilder/CD077/550px/img0018.jpg>  
<https://www.dermis.net/bilder/CD151/550px/img0043.jpg>

<https://www.dermis.net/bilder/CD085/550px/img0005.jpg>  
<https://www.dermis.net/bilder/CD085/550px/img0006.jpg>  
<https://www.dermis.net/bilder/CD085/550px/img0078.jpg>  
<https://www.dermis.net/bilder/CD085/550px/img0079.jpg>  
<https://www.dermis.net/bilder/CD154/550px/img0082.jpg>  
<https://www.dermis.net/bilder/CD154/550px/img0083.jpg>  
<https://www.dermis.net/bilder/CD152/550px/img0031.jpg>  
<https://www.dermis.net/bilder/CD152/550px/img0032.jpg>  
<https://www.dermis.net/bilder/CD077/550px/img0056.jpg>  
<https://www.dermis.net/bilder/CD077/550px/img0048.jpg>  
<https://www.dermis.net/bilder/CD077/550px/img0049.jpg>  
<https://www.dermis.net/bilder/CD040/550px/img0029.jpg>  
<https://www.dermis.net/bilder/CD151/550px/img0039.jpg>  
<https://www.dermis.net/bilder/CD151/550px/img0041.jpg>  
<https://www.dermis.net/bilder/CD151/550px/img0042.jpg>  
<https://www.dermis.net/bilder/CD078/550px/img0037.jpg>  
<https://www.dermis.net/bilder/CD078/550px/img0038.jpg>  
<https://www.dermis.net/bilder/CD078/550px/img0039.jpg>  
<https://www.dermis.net/bilder/CD154/550px/img0053.jpg>  
<https://www.dermis.net/bilder/CD153/550px/img0033.jpg>  
<https://www.dermis.net/bilder/CD153/550px/img0034.jpg>  
<https://www.dermis.net/bilder/CD039/550px/img0037.jpg>  
<https://www.dermis.net/bilder/CD039/550px/img0038.jpg>  
<https://www.dermis.net/bilder/CD077/550px/img0061.jpg>  
<https://www.dermis.net/bilder/CD014/550px/img0029.jpg>  
<https://www.dermis.net/bilder/CD076/550px/img0045.jpg>  
<https://www.dermis.net/bilder/CD078/550px/img0060.jpg>  
<https://www.dermis.net/bilder/CD078/550px/img0094.jpg>  
<https://www.dermis.net/bilder/CD150/550px/img0078.jpg>  
<https://www.dermis.net/bilder/CD151/550px/img0078.jpg>  
<https://www.dermis.net/bilder/CD153/550px/img0055.jpg>  
<https://www.dermis.net/bilder/CD181/550px/img0071.jpg>  
<https://www.dermis.net/bilder/CD181/550px/img0072.jpg>  
<https://www.dermis.net/bilder/CD193/550px/img0134.jpg>  
<https://www.dermis.net/bilder/CD195/550px/img0084.jpg>  
<https://www.dermis.net/bilder/CD196/550px/img0001.jpg>  
<https://www.dermis.net/bilder/CD197/550px/img0034.jpg>  
<https://www.dermis.net/bilder/CD197/550px/img0035.jpg>  
<https://www.dermis.net/bilder/CD196/550px/img0077.jpg>  
<https://www.dermis.net/bilder/CD183/550px/img0030.jpg>  
<https://www.dermis.net/bilder/CD014/550px/img0034.jpg>  
<https://www.dermis.net/bilder/CD079/550px/img0068.jpg>  
<https://www.dermis.net/bilder/CD151/550px/img0034.jpg>  
<https://www.dermis.net/bilder/CD152/550px/img0069.jpg>  
<https://www.dermis.net/bilder/CD046/550px/img0057.jpg>  
<https://www.dermis.net/bilder/CD055/550px/img0005.jpg>  
<https://www.dermis.net/bilder/CD188/550px/img0020.jpg>  
<https://www.dermis.net/bilder/CD198/550px/img0106.jpg>

<https://www.dermis.net/bilder/CD078/550px/img0099.jpg>  
<https://www.dermis.net/bilder/CD078/550px/img0101.jpg>  
<https://www.dermis.net/bilder/CD078/550px/img0102.jpg>  
<https://www.dermis.net/bilder/CD151/550px/img0060.jpg>  
<https://www.dermis.net/bilder/CD151/550px/img0061.jpg>  
<https://www.dermis.net/bilder/CD011/550px/img0018.jpg>  
<https://www.dermis.net/bilder/CD011/550px/img0019.jpg>  
<https://www.dermis.net/bilder/CD152/550px/img0034.jpg>  
<https://www.dermis.net/bilder/CD152/550px/img0035.jpg>  
<https://www.dermis.net/bilder/CD152/550px/img0036.jpg>  
<https://www.dermis.net/bilder/CD152/550px/img0040.jpg>  
<https://www.dermis.net/bilder/CD152/550px/img0041.jpg>  
<https://www.dermis.net/bilder/CD152/550px/img0042.jpg>  
<https://www.dermis.net/bilder/CD152/550px/img0016.jpg>  
<https://www.dermis.net/bilder/CD043/550px/img0038.jpg>  
<https://www.dermis.net/bilder/CD043/550px/img0039.jpg>  
<https://www.dermis.net/bilder/CD037/550px/img0023.jpg>  
<https://www.dermis.net/bilder/CD076/550px/img0001.jpg>  
<https://www.dermis.net/bilder/CD076/550px/img0002.jpg>  
<https://www.dermis.net/bilder/CD076/550px/img0004.jpg>  
<https://www.dermis.net/bilder/CD076/550px/img0005.jpg>  
<https://www.dermis.net/bilder/CD076/550px/img0006.jpg>  
<https://www.dermis.net/bilder/CD076/550px/img0008.jpg>  
<https://www.dermis.net/bilder/CD151/550px/img0002.jpg>  
<https://www.dermis.net/bilder/CD151/550px/img0003.jpg>  
<https://www.dermis.net/bilder/CD151/550px/img0004.jpg>  
<https://www.dermis.net/bilder/CD152/550px/img0093.jpg>  
<https://www.dermis.net/bilder/CD152/550px/img0096.jpg>  
<https://www.dermis.net/bilder/CD154/550px/img0101.jpg>  
<https://www.dermis.net/bilder/CD154/550px/img0102.jpg>  
<https://www.dermis.net/bilder/CD154/550px/img0103.jpg>  
<https://www.dermis.net/bilder/CD154/550px/img0104.jpg>  
<https://www.dermis.net/bilder/CD002/550px/img0017.jpg>  
<https://www.dermis.net/bilder/CD152/550px/img0098.jpg>  
<https://www.dermis.net/bilder/CD153/550px/img0001.jpg>  
<https://www.dermis.net/bilder/CD153/550px/img0002.jpg>  
<https://www.dermis.net/bilder/CD153/550px/img0003.jpg>  
<https://www.dermis.net/bilder/CD153/550px/img0048.jpg>  
<https://www.dermis.net/bilder/CD193/550px/img0005.jpg>  
<https://www.dermis.net/bilder/CD151/550px/img0091.jpg>  
<https://www.dermis.net/bilder/CD076/550px/img0035.jpg>  
<https://www.dermis.net/bilder/CD078/550px/img0084.jpg>  
<https://www.dermis.net/bilder/CD078/550px/img0086.jpg>  
<https://www.dermis.net/bilder/CD079/550px/img0050.jpg>  
<https://www.dermis.net/bilder/CD055/550px/img0019.jpg>  
<https://www.dermis.net/bilder/CD055/550px/img0020.jpg>  
<https://www.dermis.net/bilder/CD003/550px/img0073.jpg>  
<https://www.dermis.net/bilder/CD057/550px/img0002.jpg>

<https://www.dermis.net/bilder/CD055/550px/img0007.jpg>  
<https://www.dermis.net/bilder/CD191/550px/img0022.jpg>  
<https://www.dermis.net/bilder/CD079/550px/img0078.jpg>  
<https://www.dermis.net/bilder/CD018/550px/img0002.jpg>  
<https://www.dermis.net/bilder/CD152/550px/img0048.jpg>  
<https://www.dermis.net/bilder/CD021/550px/img0070.jpg>  
<https://www.dermis.net/bilder/CD151/550px/img0074.jpg>  
<https://www.dermis.net/bilder/CD151/550px/img0075.jpg>  
<https://www.dermis.net/bilder/CD154/550px/img0005.jpg>  
<https://www.dermis.net/bilder/CD154/550px/img0008.jpg>  
<https://www.dermis.net/bilder/CD003/550px/img0025.jpg>  
<https://www.dermis.net/bilder/CD077/550px/img0008.jpg>  
<https://www.dermis.net/bilder/CD003/550px/img0076.jpg>  
<https://www.dermis.net/bilder/CD003/550px/img0077.jpg>  
<https://www.dermis.net/bilder/CD043/550px/img0044.jpg>  
<https://www.dermis.net/bilder/CD043/550px/img0045.jpg>  
<https://www.dermis.net/bilder/CD043/550px/img0046.jpg>  
<https://www.dermis.net/bilder/CD043/550px/img0047.jpg>  
<https://www.dermis.net/bilder/CD021/550px/img0071.jpg>  
<https://www.dermis.net/bilder/CD039/550px/img0091.jpg>  
<https://www.dermis.net/bilder/CD039/550px/img0093.jpg>  
<https://www.dermis.net/bilder/CD039/550px/img0094.jpg>  
<https://www.dermis.net/bilder/CD039/550px/img0097.jpg>  
<https://www.dermis.net/bilder/CD035/550px/img0068.jpg>  
<https://www.dermis.net/bilder/CD154/550px/img0073.jpg>  
<https://www.dermis.net/bilder/CD057/550px/img0013.jpg>  
<https://www.dermis.net/bilder/CD077/550px/img0054.jpg>  
<https://www.dermis.net/bilder/CD077/550px/img0062.jpg>  
<https://www.dermis.net/bilder/CD153/550px/img0051.jpg>  
<https://www.dermis.net/bilder/CD152/550px/img0085.jpg>  
<https://www.dermis.net/bilder/CD152/550px/img0086.jpg>  
<https://www.dermis.net/bilder/CD191/550px/img0065.jpg>  
<https://www.dermis.net/bilder/CD106/550px/img0008.jpg>  
<https://www.dermis.net/bilder/CD002/550px/img0098.jpg>  
<https://www.dermis.net/bilder/CD002/550px/img0075.jpg>  
<https://www.dermis.net/bilder/CD021/550px/img0008.jpg>  
<https://www.dermis.net/bilder/CD021/550px/img0043.jpg>  
<https://www.dermis.net/bilder/CD002/550px/img0073.jpg>  
<https://www.dermis.net/bilder/CD013/550px/img0049.jpg>  
<https://www.dermis.net/bilder/CD150/550px/img0106.jpg>  
<https://www.dermis.net/bilder/CD150/550px/img0107.jpg>  
<https://www.dermis.net/bilder/CD002/550px/img0099.jpg>  
<https://www.dermis.net/bilder/CD021/550px/img0002.jpg>  
<https://www.dermis.net/bilder/CD150/550px/img0001.jpg>  
<https://www.dermis.net/bilder/CD150/550px/img0002.jpg>  
<https://www.dermis.net/bilder/CD150/550px/img0044.jpg>  
<https://www.dermis.net/bilder/CD150/550px/img0045.jpg>  
<https://www.dermis.net/bilder/CD154/550px/img0056.jpg>



<https://www.dermis.net/bilder/CD154/550px/img0057.jpg>  
<https://www.dermis.net/bilder/CD154/550px/img0058.jpg>  
<https://www.dermis.net/bilder/CD012/550px/img0046.jpg>  
<https://www.dermis.net/bilder/CD012/550px/img0057.jpg>  
<https://www.dermis.net/bilder/CD012/550px/img0058.jpg>  
<https://www.dermis.net/bilder/CD012/550px/img0059.jpg>  
<https://www.dermis.net/bilder/CD012/550px/img0060.jpg>  
<https://www.dermis.net/bilder/CD076/550px/img0049.jpg>  
<https://www.dermis.net/bilder/CD076/550px/img0050.jpg>  
<https://www.dermis.net/bilder/CD079/550px/img0084.jpg>  
<https://www.dermis.net/bilder/CD077/550px/img0052.jpg>  
<https://www.dermis.net/bilder/CD061/550px/img0002.jpg>  
<https://www.dermis.net/bilder/CD061/550px/img0003.jpg>  
<https://www.dermis.net/bilder/CD067/550px/img0017.jpg>  
<https://www.dermis.net/bilder/CD191/550px/img0108.jpg>  
<https://www.dermis.net/bilder/CD191/550px/img0111.jpg>  
<https://www.dermis.net/bilder/CD191/550px/img0112.jpg>  
<https://www.dermis.net/bilder/CD151/550px/img0106.jpg>  
<https://www.dermis.net/bilder/CD151/550px/img0107.jpg>  
<https://www.dermis.net/bilder/CD151/550px/img0108.jpg>  
<https://www.dermis.net/bilder/CD151/550px/img0110.jpg>  
<https://www.dermis.net/bilder/CD042/550px/img0033.jpg>  
<https://www.dermis.net/bilder/CD187/550px/img0078.jpg>  
<https://www.dermis.net/bilder/CD187/550px/img0079.jpg>  
<https://www.dermis.net/bilder/CD187/550px/img0080.jpg>  
<https://www.dermis.net/bilder/CD187/550px/img0081.jpg>  
<https://www.dermis.net/bilder/CD187/550px/img0082.jpg>  
<https://www.dermis.net/bilder/CD152/550px/img0018.jpg>  
<https://www.dermis.net/bilder/CD152/550px/img0019.jpg>  
<https://www.dermis.net/bilder/CD152/550px/img0020.jpg>  
<https://www.dermis.net/bilder/CD151/550px/img0097.jpg>  
<https://www.dermis.net/bilder/CD183/550px/img0022.jpg>  
<https://www.dermis.net/bilder/CD183/550px/img0024.jpg>  
<https://www.dermis.net/bilder/CD183/550px/img0025.jpg>  
<https://www.dermis.net/bilder/CD076/550px/img0099.jpg>  
<https://www.dermis.net/bilder/CD076/550px/img0100.jpg>  
<https://www.dermis.net/bilder/CD076/550px/img0101.jpg>  
<https://www.dermis.net/bilder/CD077/550px/img0022.jpg>  
<https://www.dermis.net/bilder/CD079/550px/img0035.jpg>  
<https://www.dermis.net/bilder/CD077/550px/img0023.jpg>  
<https://www.dermis.net/bilder/CD077/550px/img0024.jpg>  
<https://www.dermis.net/bilder/CD079/550px/img0034.jpg>  
<https://www.dermis.net/bilder/CD154/550px/img0011.jpg>  
<https://www.dermis.net/bilder/CD079/550px/img0037.jpg>  
<https://www.dermis.net/bilder/CD079/550px/img0039.jpg>  
<https://www.dermis.net/bilder/CD185/550px/img0006.jpg>  
<https://www.dermis.net/bilder/CD185/550px/img0007.jpg>  
<https://www.dermis.net/bilder/CD185/550px/img0008.jpg>

<https://www.dermis.net/bilder/CD150/550px/img0079.jpg>  
<https://www.dermis.net/bilder/CD011/550px/img0097.jpg>  
<https://www.dermis.net/bilder/CD151/550px/img0054.jpg>  
<https://www.dermis.net/bilder/CD151/550px/img0055.jpg>  
<https://www.dermis.net/bilder/CD061/550px/img0007.jpg>  
<https://www.dermis.net/bilder/CD079/550px/img0056.jpg>  
<https://www.dermis.net/bilder/CD055/550px/img0002.jpg>  
<https://www.dermis.net/bilder/CD055/550px/img0013.jpg>  
<https://www.dermis.net/bilder/CD076/550px/img0077.jpg>  
<https://www.dermis.net/bilder/CD076/550px/img0078.jpg>  
<https://www.dermis.net/bilder/CD077/550px/img0068.jpg>  
<https://www.dermis.net/bilder/CD153/550px/img0039.jpg>  
<https://www.dermis.net/bilder/CD154/550px/img0068.jpg>  
<https://www.dermis.net/bilder/CD210/550px/img0031.jpg>  
<https://www.dermis.net/bilder/CD002/550px/img0014.jpg>  
<https://www.dermis.net/bilder/CD076/550px/img0029.jpg>  
<https://www.dermis.net/bilder/CD043/550px/img0033.jpg>  
<https://www.dermis.net/bilder/CD078/550px/img0010.jpg>  
<https://www.dermis.net/bilder/CD078/550px/img0011.jpg>  
<https://www.dermis.net/bilder/CD078/550px/img0012.jpg>  
<https://www.dermis.net/bilder/CD078/550px/img0013.jpg>  
<https://www.dermis.net/bilder/CD002/550px/img0056.jpg>  
<https://www.dermis.net/bilder/CD039/550px/img0033.jpg>  
<https://www.dermis.net/bilder/CD077/550px/img0006.jpg>  
<https://www.dermis.net/bilder/CD078/550px/img0027.jpg>  
<https://www.dermis.net/bilder/CD079/550px/img0062.jpg>  
<https://www.dermis.net/bilder/CD079/550px/img0086.jpg>  
<https://www.dermis.net/bilder/CD079/550px/img0099.jpg>  
<https://www.dermis.net/bilder/CD150/550px/img0062.jpg>  
<https://www.dermis.net/bilder/CD150/550px/img0097.jpg>  
<https://www.dermis.net/bilder/CD150/550px/img0098.jpg>  
<https://www.dermis.net/bilder/CD151/550px/img0024.jpg>  
<https://www.dermis.net/bilder/CD151/550px/img0057.jpg>  
<https://www.dermis.net/bilder/CD151/550px/img0102.jpg>  
<https://www.dermis.net/bilder/CD152/550px/img0065.jpg>  
<https://www.dermis.net/bilder/CD153/550px/img0084.jpg>  
<https://www.dermis.net/bilder/CD153/550px/img0086.jpg>  
<https://www.dermis.net/bilder/CD154/550px/img0002.jpg>  
<https://www.dermis.net/bilder/CD150/550px/img0077.jpg>  
<https://www.dermis.net/bilder/CD153/550px/img0103.jpg>  
<https://www.dermis.net/bilder/CD187/550px/img0035.jpg>  
<https://www.dermis.net/bilder/CD085/550px/img0015.jpg>  
<https://www.dermis.net/bilder/CD085/550px/img0016.jpg>  
<https://www.dermis.net/bilder/CD085/550px/img0017.jpg>  
<https://www.dermis.net/bilder/CD085/550px/img0032.jpg>  
<https://www.dermis.net/bilder/CD184/550px/img0013.jpg>  
<https://www.dermis.net/bilder/CD151/550px/img0079.jpg>  
<https://www.dermis.net/bilder/CD151/550px/img0080.jpg>

<https://www.dermis.net/bilder/CD079/550px/img0019.jpg>  
<https://www.dermis.net/bilder/CD079/550px/img0021.jpg>  
<https://www.dermis.net/bilder/CD079/550px/img0022.jpg>  
<https://www.dermis.net/bilder/CD190/550px/img0058.jpg>  
<https://www.dermis.net/bilder/CD028/550px/img0090.jpg>  
<https://www.dermis.net/bilder/CD028/550px/img0092.jpg>  
<https://www.dermis.net/bilder/CD028/550px/img0093.jpg>  
<https://www.dermis.net/bilder/CD028/550px/img0096.jpg>  
<https://www.dermis.net/bilder/CD152/550px/img0083.jpg>  
<https://www.dermis.net/bilder/CD210/550px/img0156.jpg>  
<https://www.dermis.net/bilder/CD013/550px/img0025.jpg>  
<https://www.dermis.net/bilder/CD040/550px/img0048.jpg>  
<https://www.dermis.net/bilder/CD055/550px/img0010.jpg>  
<https://www.dermis.net/bilder/CD055/550px/img0011.jpg>  
<https://www.dermis.net/bilder/CD055/550px/img0015.jpg>  
<https://www.dermis.net/bilder/CD055/550px/img0016.jpg>  
<https://www.dermis.net/bilder/CD055/550px/img0030.jpg>  
<https://www.dermis.net/bilder/CD076/550px/img0052.jpg>  
<https://www.dermis.net/bilder/CD076/550px/img0054.jpg>  
<https://www.dermis.net/bilder/CD076/550px/img0056.jpg>  
<https://www.dermis.net/bilder/CD076/550px/img0064.jpg>  
<https://www.dermis.net/bilder/CD077/550px/img0033.jpg>  
<https://www.dermis.net/bilder/CD077/550px/img0034.jpg>  
<https://www.dermis.net/bilder/CD078/550px/img0071.jpg>  
<https://www.dermis.net/bilder/CD079/550px/img0024.jpg>  
<https://www.dermis.net/bilder/CD079/550px/img0092.jpg>  
<https://www.dermis.net/bilder/CD079/550px/img0097.jpg>  
<https://www.dermis.net/bilder/CD079/550px/img0098.jpg>  
<https://www.dermis.net/bilder/CD150/550px/img0057.jpg>  
<https://www.dermis.net/bilder/CD150/550px/img0068.jpg>  
<https://www.dermis.net/bilder/CD151/550px/img0059.jpg>  
<https://www.dermis.net/bilder/CD153/550px/img0040.jpg>  
<https://www.dermis.net/bilder/CD153/550px/img0060.jpg>  
<https://www.dermis.net/bilder/CD153/550px/img0087.jpg>  
<https://www.dermis.net/bilder/CD153/550px/img0088.jpg>  
<https://www.dermis.net/bilder/CD154/550px/img0042.jpg>  
<https://www.dermis.net/bilder/CD190/550px/img0053.jpg>  
<https://www.dermis.net/bilder/CD185/550px/img0018.jpg>  
<https://www.dermis.net/bilder/CD184/550px/img0078.jpg>  
<https://www.dermis.net/bilder/CD183/550px/img0015.jpg>  
<https://www.dermis.net/bilder/CD193/550px/img0162.jpg>  
<https://www.dermis.net/bilder/CD193/550px/img0163.jpg>  
<https://www.dermis.net/bilder/CD194/550px/img0064.jpg>  
<https://www.dermis.net/bilder/CD195/550px/img0080.jpg>  
<https://www.dermis.net/bilder/CD195/550px/img0081.jpg>  
<https://www.dermis.net/bilder/CD196/550px/img0130.jpg>  
<https://www.dermis.net/bilder/CD196/550px/img0131.jpg>  
<https://www.dermis.net/bilder/CD196/550px/img0132.jpg>

<https://www.dermis.net/bilder/CD196/550px/img0134.jpg>  
<https://www.dermis.net/bilder/CD196/550px/img0136.jpg>  
<https://www.dermis.net/bilder/CD193/550px/img0172.jpg>  
<https://www.dermis.net/bilder/CD193/550px/img0173.jpg>  
<https://www.dermis.net/bilder/CD210/550px/img0022.jpg>  
<https://www.dermis.net/bilder/CD211/550px/img0071.jpg>  
<https://www.dermis.net/bilder/CD211/550px/img0072.jpg>  
<https://www.dermis.net/bilder/CD076/550px/img0037.jpg>  
<https://www.dermis.net/bilder/CD079/550px/img0001.jpg>  
<https://www.dermis.net/bilder/CD079/550px/img0002.jpg>  
<https://www.dermis.net/bilder/CD079/550px/img0003.jpg>  
<https://www.dermis.net/bilder/CD079/550px/img0004.jpg>  
<https://www.dermis.net/bilder/CD153/550px/img0071.jpg>  
<https://www.dermis.net/bilder/CD153/550px/img0072.jpg>  
<https://www.dermis.net/bilder/CD153/550px/img0073.jpg>  
<https://www.dermis.net/bilder/CD153/550px/img0074.jpg>  
<https://www.dermis.net/bilder/CD033/550px/img0037.jpg>  
<https://www.dermis.net/bilder/CD077/550px/img0070.jpg>  
<https://www.dermis.net/bilder/CD077/550px/img0075.jpg>  
<https://www.dermis.net/bilder/CD077/550px/img0077.jpg>  
<https://www.dermis.net/bilder/CD153/550px/img0092.jpg>  
<https://www.dermis.net/bilder/CD153/550px/img0093.jpg>  
<https://www.dermis.net/bilder/CD042/550px/img0024.jpg>  
<https://www.dermis.net/bilder/CD042/550px/img0025.jpg>  
<https://www.dermis.net/bilder/CD042/550px/img0026.jpg>  
<https://www.dermis.net/bilder/CD016/550px/img0049.jpg>  
<https://www.dermis.net/bilder/CD077/550px/img0016.jpg>  
<https://www.dermis.net/bilder/CD079/550px/img0072.jpg>  
<https://www.dermis.net/bilder/CD052/550px/img0094.jpg>  
<https://www.dermis.net/bilder/CD036/550px/img0065.jpg>  
<https://www.dermis.net/bilder/CD056/550px/img0030.jpg>  
<https://www.dermis.net/bilder/CD185/550px/img0046.jpg>  
<https://www.dermis.net/bilder/CD056/550px/img0078.jpg>  
<https://www.dermis.net/bilder/CD152/550px/img0021.jpg>  
<https://www.dermis.net/bilder/CD152/550px/img0022.jpg>  
<https://www.dermis.net/bilder/CD011/550px/img0082.jpg>  
<https://www.dermis.net/bilder/CD011/550px/img0084.jpg>  
<https://www.dermis.net/bilder/CD065/550px/img0063.jpg>  
<https://www.dermis.net/bilder/CD036/550px/img0027.jpg>  
<https://www.dermis.net/bilder/CD152/550px/img0051.jpg>  
<https://www.dermis.net/bilder/CD152/550px/img0052.jpg>  
<https://www.dermis.net/bilder/CD152/550px/img0053.jpg>  
<https://www.dermis.net/bilder/CD152/550px/img0055.jpg>  
<https://www.dermis.net/bilder/CD154/550px/img0092.jpg>  
<https://www.dermis.net/bilder/CD154/550px/img0093.jpg>  
<https://www.dermis.net/bilder/CD078/550px/img0041.jpg>  
<https://www.dermis.net/bilder/CD078/550px/img0042.jpg>  
<https://www.dermis.net/bilder/CD078/550px/img0043.jpg>

<https://www.dermis.net/bilder/CD078/550px/img0045.jpg>  
<https://www.dermis.net/bilder/CD150/550px/img0083.jpg>  
<https://www.dermis.net/bilder/CD152/550px/img0003.jpg>  
<https://www.dermis.net/bilder/CD152/550px/img0004.jpg>  
<https://www.dermis.net/bilder/CD152/550px/img0005.jpg>  
<https://www.dermis.net/bilder/CD152/550px/img0006.jpg>  
<https://www.dermis.net/bilder/CD152/550px/img0092.jpg>  
<https://www.dermis.net/bilder/CD077/550px/img0096.jpg>  
<https://www.dermis.net/bilder/CD076/550px/img0073.jpg>  
<https://www.dermis.net/bilder/CD076/550px/img0074.jpg>  
<https://www.dermis.net/bilder/CD151/550px/img0104.jpg>  
<https://www.dermis.net/bilder/CD001/550px/img0031.jpg>  
<https://www.dermis.net/bilder/CD003/550px/img0078.jpg>  
<https://www.dermis.net/bilder/CD006/550px/img0054.jpg>  
<https://www.dermis.net/bilder/CD026/550px/img0062.jpg>  
<https://www.dermis.net/bilder/CD058/550px/img0085.jpg>  
<https://www.dermis.net/bilder/CD058/550px/img0091.jpg>  
<https://www.dermis.net/bilder/CD058/550px/img0092.jpg>  
<https://www.dermis.net/bilder/CD063/550px/img0067.jpg>  
<https://www.dermis.net/bilder/CD063/550px/img0068.jpg>  
<https://www.dermis.net/bilder/CD178/550px/img0028.jpg>  
<https://www.dermis.net/bilder/CD178/550px/img0030.jpg>  
<https://www.dermis.net/bilder/CD181/550px/img0001.jpg>  
<https://www.dermis.net/bilder/CD183/550px/img0013.jpg>  
<https://www.dermis.net/bilder/CD183/550px/img0014.jpg>  
<https://www.dermis.net/bilder/CD184/550px/img0050.jpg>  
<https://www.dermis.net/bilder/CD184/550px/img0052.jpg>  
<https://www.dermis.net/bilder/CD185/550px/img0078.jpg>  
<https://www.dermis.net/bilder/CD185/550px/img0081.jpg>  
<https://www.dermis.net/bilder/CD185/550px/img0082.jpg>  
<https://www.dermis.net/bilder/CD187/550px/img0053.jpg>  
<https://www.dermis.net/bilder/CD187/550px/img0054.jpg>  
<https://www.dermis.net/bilder/CD187/550px/img0055.jpg>  
<https://www.dermis.net/bilder/CD187/550px/img0056.jpg>  
<https://www.dermis.net/bilder/CD187/550px/img0057.jpg>  
<https://www.dermis.net/bilder/CD187/550px/img0070.jpg>  
<https://www.dermis.net/bilder/CD191/550px/img0044.jpg>  
<https://www.dermis.net/bilder/CD191/550px/img0045.jpg>  
<https://www.dermis.net/bilder/CD191/550px/img0046.jpg>  
<https://www.dermis.net/bilder/CD192/550px/img0069.jpg>  
<https://www.dermis.net/bilder/CD194/550px/img0129.jpg>  
[http://www.hellenicdermatlas.com/photos/0000/0001/00000001\\_standalone.jpg](http://www.hellenicdermatlas.com/photos/0000/0001/00000001_standalone.jpg)  
[http://www.hellenicdermatlas.com/photos/0000/0002/00000002\\_standalone.jpg](http://www.hellenicdermatlas.com/photos/0000/0002/00000002_standalone.jpg)  
[http://www.hellenicdermatlas.com/photos/0000/0003/00000003\\_standalone.jpg](http://www.hellenicdermatlas.com/photos/0000/0003/00000003_standalone.jpg)  
[http://www.hellenicdermatlas.com/photos/0000/0004/00000004\\_standalone.jpg](http://www.hellenicdermatlas.com/photos/0000/0004/00000004_standalone.jpg)  
[http://www.hellenicdermatlas.com/photos/0000/0005/00000005\\_standalone.jpg](http://www.hellenicdermatlas.com/photos/0000/0005/00000005_standalone.jpg)  
[http://www.hellenicdermatlas.com/photos/0000/0006/00000006\\_standalone.jpg](http://www.hellenicdermatlas.com/photos/0000/0006/00000006_standalone.jpg)  
[http://www.hellenicdermatlas.com/photos/0000/0007/00000007\\_standalone.jpg](http://www.hellenicdermatlas.com/photos/0000/0007/00000007_standalone.jpg)



























































































































[http://www.hellenicdermatlas.com/photos/0000/2822/00002822\\_standalone.jpg](http://www.hellenicdermatlas.com/photos/0000/2822/00002822_standalone.jpg)  
[http://www.hellenicdermatlas.com/photos/0000/2823/00002823\\_standalone.jpg](http://www.hellenicdermatlas.com/photos/0000/2823/00002823_standalone.jpg)  
[http://www.hellenicdermatlas.com/photos/0000/2824/00002824\\_standalone.jpg](http://www.hellenicdermatlas.com/photos/0000/2824/00002824_standalone.jpg)  
[http://www.hellenicdermatlas.com/photos/0000/2825/00002825\\_standalone.jpg](http://www.hellenicdermatlas.com/photos/0000/2825/00002825_standalone.jpg)  
[http://www.hellenicdermatlas.com/photos/0000/2826/00002826\\_standalone.jpg](http://www.hellenicdermatlas.com/photos/0000/2826/00002826_standalone.jpg)  
[http://www.hellenicdermatlas.com/photos/0000/2827/00002827\\_standalone.jpg](http://www.hellenicdermatlas.com/photos/0000/2827/00002827_standalone.jpg)  
[http://www.hellenicdermatlas.com/photos/0000/2828/00002828\\_standalone.jpg](http://www.hellenicdermatlas.com/photos/0000/2828/00002828_standalone.jpg)  
[http://www.hellenicdermatlas.com/photos/0000/2829/00002829\\_standalone.jpg](http://www.hellenicdermatlas.com/photos/0000/2829/00002829_standalone.jpg)  
[http://www.hellenicdermatlas.com/photos/0000/2830/00002830\\_standalone.jpg](http://www.hellenicdermatlas.com/photos/0000/2830/00002830_standalone.jpg)  
[http://www.hellenicdermatlas.com/photos/0000/2831/00002831\\_standalone.jpg](http://www.hellenicdermatlas.com/photos/0000/2831/00002831_standalone.jpg)  
[http://www.hellenicdermatlas.com/photos/0000/2832/00002832\\_standalone.jpg](http://www.hellenicdermatlas.com/photos/0000/2832/00002832_standalone.jpg)  
[http://www.hellenicdermatlas.com/photos/0000/0017/00000017\\_standalone.jpg](http://www.hellenicdermatlas.com/photos/0000/0017/00000017_standalone.jpg)  
[http://www.hellenicdermatlas.com/photos/0000/1755/00001755\\_standalone.jpg](http://www.hellenicdermatlas.com/photos/0000/1755/00001755_standalone.jpg)  
[http://www.hellenicdermatlas.com/photos/0000/2155/00002155\\_standalone.jpg](http://www.hellenicdermatlas.com/photos/0000/2155/00002155_standalone.jpg)  
[http://www.hellenicdermatlas.com/photos/0000/2833/00002833\\_standalone.jpg](http://www.hellenicdermatlas.com/photos/0000/2833/00002833_standalone.jpg)
